# Supplementary material for: In Silico Repositioning-Chemogenomics Strategy Identifies New Drugs with Potential Activity against Multiple Life Stages of Schistosoma mansoni
Source: PLoS Negl Trop Dis. 2015 Jan 8;9(1):e3435. doi: 10.1371/journal.pntd.0003435 (PMC4287566; doi:10.1371/journal.pntd.0003435)
Supplement: S2 Table — Dataset of known schistosomicidal compounds, with SMILES line notation for describing chemical structures, references, molecular descriptors and cluster analysis results. (XLSX) [file pntd.0003435.s003.xlsx]

## Sheet: __JChemStructureSheet
Hash	StructureStringLength	StructureStringFormat	StructureString
F0B2F0576033E5152BC9532B1382F9D1	1	cxsmiles	JChemExcelugEAAB+LCAAAAAAABADtvQdgHEmWJSYvbcp7f0r1StfgdKEIgGATJNiQQBDswYjN5pLsHWlHIymrKoHKZVZlXWYWQMztnbz33nvvvffee++997o7nU4n99//P1xmZAFs9s5K2smeIYCqyB8/fnwfPyK+9+3vf3myRf/e4X9OdvmH+ejLkz35WP/0f7c/7/lN+Nf9z056n92XH5/2vnigPR5sveh9J796n3QbHHQ/7bYV6NTtBiB9LPc3Nb/nPhXqGCoZksTfDYjnv92B32/n/67z871vf///AZtztzu6AQAA
40ADEA3EC008FFB706BCFC7649D11EF6	1	cxsmiles	JChemExceluQEAAB+LCAAAAAAABADtvQdgHEmWJSYvbcp7f0r1StfgdKEIgGATJNiQQBDswYjN5pLsHWlHIymrKoHKZVZlXWYWQMztnbz33nvvvffee++997o7nU4n99//P1xmZAFs9s5K2smeIYCqyB8/fnwfPyK+9+3vf3myRf/e4X9OdvmH+ejLkz352Gtx77OT3mf78uN+74tPFdyDrRe97+RX75NugwfdT7ttBTp1uwFIH8t7m5rvdT81JDAkib/7Ze93fav3uSFwSOjbQtW3vvft7/8/yi1ijLkBAAA=
F58314FB908A699097C2057E69DBF8F8	1	cxsmiles	JChemExcelZgAAAB+LCAAAAAAABADtvQdgHEmWJSYvbcp7f0r1StfgdKEIgGATJNiQQBDswYjN5pLsHWlHIymrKoHKZVZlXWYWQMztnbz33nvvvffee++997o7nU4n99//P1xmZAFs9s5K2smeIYCqyB8/fnwfPyK+9+3vv9ia7i6nW/TbnenWSXlHf93Fvy+3PvvyDn+/Z1r0/t1rdqn14NeA8/8A7/pYvGYAAAA=
06A081A2BE561056947861023B380BBB	1	cxsmiles	JChemExcelagAAAB+LCAAAAAAABADtvQdgHEmWJSYvbcp7f0r1StfgdKEIgGATJNiQQBDswYjN5pLsHWlHIymrKoHKZVZlXWYWQMztnbz33nvvvffee++997o7nU4n99//P1xmZAFs9s5K2smeIYCqyB8/fnwfPyK+9+3vv9ia7k636Jc7kX93n915ufXZl3eozXK6N9hsr9m9swnK9779/f8HVtZF0moAAAA=
31520C0769ADF8339FFBD51FA6DDC02B	1	cxsmiles	JChemExcelPQAAAB+LCAAAAAAABADtvQdgHEmWJSYvbcp7f0r1StfgdKEIgGATJNiQQBDswYjN5pLsHWlHIymrKoHKZVZlXWYWQMztnbz33nvvvffee++997o7nU4n99//P1xmZAFs9s5K2smeIYCqyB8/fnwfPyK+9+3vT3er6dZ0i367M93Fvydbn31Jvy6rpfyif1faxrX8fwBL5dkDPQAAAA==
DDA328457E02D69672AEA25F986F2172	1	cxsmiles	JChemExcelagAAAB+LCAAAAAAABADtvQdgHEmWJSYvbcp7f0r1StfgdKEIgGATJNiQQBDswYjN5pLsHWlHIymrKoHKZVZlXWYWQMztnbz33nvvvffee++997o7nU4n99//P1xmZAFs9s5K2smeIYCqyB8/fnwfPyK+9+3vT3enW/Tjjv67d7L12Zd3pvemW1+e8Cf8z42/ehC2ntR3pvvLarq1Pd2b7vJn9/b/H3qC34hqAAAA
5021CEBB6753C98D681D7E911617C6B7	1	cxsmiles	JChemExcelOgAAAB+LCAAAAAAABADtvQdgHEmWJSYvbcp7f0r1StfgdKEIgGATJNiQQBDswYjN5pLsHWlHIymrKoHKZVZlXWYWQMztnbz33nvvvffee++997o7nU4n99//P1xmZAFs9s5K2smeIYCqyB8/fnwfPyK+9+3vf7ncrZbTvenudHc53Vryz2q59dmXd6Z7u3dOtqjJHf7H+/V73/7+/wMwIJDaOgAAAA==
5C2CAC943829AE132B7AE1FBEDC75052	1	cxsmiles	JChemExcelXgAAAB+LCAAAAAAABADtvQdgHEmWJSYvbcp7f0r1StfgdKEIgGATJNiQQBDswYjN5pLsHWlHIymrKoHKZVZlXWYWQMztnbz33nvvvffee++997o7nU4n99//P1xmZAFs9s5K2smeIYCqyB8/fnwfPyK+9+3vv9ia7i6nW/TbHfm32b3zcuuzL+/w53v+N8G/e9Ruujv49e73vv39/weIdv+NXgAAAA==
5512F47293919A1D1759C36BEEE599DE	1	cxsmiles	JChemExcelswAAAB+LCAAAAAAABADtvQdgHEmWJSYvbcp7f0r1StfgdKEIgGATJNiQQBDswYjN5pLsHWlHIymrKoHKZVZlXWYWQMztnbz33nvvvffee++997o7nU4n99//P1xmZAFs9s5K2smeIYCqyB8/fnwfPyK+9+3vv9g92frsyzv0z8kW/XlnujeVn/rvl/Ix/+N9vrt3x/vixZb3x8ku//Bf9H79Ur/G/1+jZ/x/unu7Tr/37e//P4kAlpuzAAAA
863BD2BD50FCD4798035956CA5D99C1D	1	cxsmiles	JChemExcelagAAAB+LCAAAAAAABADtvQdgHEmWJSYvbcp7f0r1StfgdKEIgGATJNiQQBDswYjN5pLsHWlHIymrKoHKZVZlXWYWQMztnbz33nvvvffee++997o7nU4n99//P1xmZAFs9s5K2smeIYCqyB8/fnwfPyK+9+3vfzndne6dbJ1s0e93PjvZelLfmd5bVtOt6d69O9O9KX8e+Xd3D61Ptj778s6X8jL/g//HPvx/AKpiH7dqAAAA
092CC62DB3315BBFCD0B93CBF3A95CB3	1	cxsmiles	JChemExcelTgAAAB+LCAAAAAAABADtvQdgHEmWJSYvbcp7f0r1StfgdKEIgGATJNiQQBDswYjN5pLsHWlHIymrKoHKZVZlXWYWQMztnbz33nvvvffee++997o7nU4n99//P1xmZAFs9s5K2smeIYCqyB8/fnwfPyK+9+3vv9g92frsyzsnW/T7nc9Otl7wLy938eGX090p/xn5dxf/ylv8z/e+/f3/B/Nr7sJOAAAA
9E2DF27B9BB869204C51B6FC1130B465	1	cxsmiles	JChemExcelzwAAAB+LCAAAAAAABADtvQdgHEmWJSYvbcp7f0r1StfgdKEIgGATJNiQQBDswYjN5pLsHWlHIymrKoHKZVZlXWYWQMztnbz33nvvvffee++997o7nU4n99//P1xmZAFs9s5K2smeIYCqyB8/fnwfPyK+9+3vv9g92frsyzv0z8kW/XlnujfdnW5N5Xf9RL7hf/D/4T9fbHl/xH+1/UXb7Vqor9EK/wc6HjJbX3a61893v/ft7/8/P4pLoM8AAAA=
99F624512AD6CD555F340B3B82AB613B	1	cxsmiles	JChemExcelPQAAAB+LCAAAAAAABADtvQdgHEmWJSYvbcp7f0r1StfgdKEIgGATJNiQQBDswYjN5pLsHWlHIymrKoHKZVZlXWYWQMztnbz33nvvvffee++997o7nU4n99//P1xmZAFs9s5K2smeIYCqyB8/fnwfPyK+9+3vT3eb6dZ0i367M93Fvydbn31Jvy6rpfyifzfaxrX8fwCMKl+pPQAAAA==
DA35227D30A5F397A0E05905B1A55E95	1	cxsmiles	JChemExcelZQAAAB+LCAAAAAAABADtvQdgHEmWJSYvbcp7f0r1StfgdKEIgGATJNiQQBDswYjN5pLsHWlHIymrKoHKZVZlXWYWQMztnbz33nvvvffee++997o7nU4n99//P1xmZAFs9s5K2smeIYCqyB8/fnwfPyK+9+3vv9g92frsyzsnW/T7nc9Otl7wLy938eGX090p/2n+/VKa8T/er16T3f5X/w9VKiQvZQAAAA==
A835C1DF2F8E29D42FDFAA4F345AEB0B	1	cxsmiles	JChemExcelTQAAAB+LCAAAAAAABADtvQdgHEmWJSYvbcp7f0r1StfgdKEIgGATJNiQQBDswYjN5pLsHWlHIymrKoHKZVZlXWYWQMztnbz33nvvvffee++997o7nU4n99//P1xmZAFs9s5K2smeIYCqyB8/fnwfPyK+9+3vv9g92frsyzsnW/T7nc9Otl7wLy938eGX090p/2n+PSnNr7v4V17if7737e//P6/AT6xNAAAA
3B895FEC11D05531661AF7CB90D0E9DF	1	cxsmiles	JChemExcelXgAAAB+LCAAAAAAABADtvQdgHEmWJSYvbcp7f0r1StfgdKEIgGATJNiQQBDswYjN5pLsHWlHIymrKoHKZVZlXWYWQMztnbz33nvvvffee++997o7nU4n99//P1xmZAFs9s5K2smeIYCqyB8/fnwfPyK+9+3vv9g92frsyzsnW/T7nc9Otl7wLy938eGX090p/6n/7gV/hd/s4qdA4X++9+3v/z/HhTl7XgAAAA==
B0914945B29381A5F26AAF61438930AE	1	cxsmiles	JChemExcelawAAAB+LCAAAAAAABADtvQdgHEmWJSYvbcp7f0r1StfgdKEIgGATJNiQQBDswYjN5pLsHWlHIymrKoHKZVZlXWYWQMztnbz33nvvvffee++997o7nU4n99//P1xmZAFs9s5K2smeIYCqyB8/fnwfPyK+9+3vT3enW/TjznTL/OR/d7884V/4H/z/ZOuzL+njZbWUX/Tv4KWt7ksG2Pe+/f3/By8zPE9rAAAA
E31111F66B7756F572766A105CBBBAE5	1	cxsmiles	JChemExceltQAAAB+LCAAAAAAABADtvQdgHEmWJSYvbcp7f0r1StfgdKEIgGATJNiQQBDswYjN5pLsHWlHIymrKoHKZVZlXWYWQMztnbz33nvvvffee++997o7nU4n99//P1xmZAFs9s5K2smeIYCqyB8/fnwfPyK+9+3vv9h68dnJFv1yZ7o7lZ97060X/Jt8vqU/8M/Q596nkT9P9uyn2sXui63PvrxD/3uNn/i/7V3/NQ37kP8fPxr4w7UAAAA=
D922A0ACFEB59A9D9965662A72A819D8	1	cxsmiles	JChemExceltgAAAB+LCAAAAAAABADtvQdgHEmWJSYvbcp7f0r1StfgdKEIgGATJNiQQBDswYjN5pLsHWlHIymrKoHKZVZlXWYWQMztnbz33nvvvffee++997o7nU4n99//P1xmZAFs9s5K2smeIYCqyB8/fnwfPyK+9+3vv9h68dnJFv1yZ7o7lZ97060X/Jt8vqU/8M/Q596nkT9P9uyn2sXui63PvrxD/3uNn/i/7V3//bIDzrz4vW9///8Bk25ls7YAAAA=
A3C2C1242BFBD4882111ED63AD13D774	1	cxsmiles	JChemExcelCQEAAB+LCAAAAAAABADtvQdgHEmWJSYvbcp7f0r1StfgdKEIgGATJNiQQBDswYjN5pLsHWlHIymrKoHKZVZlXWYWQMztnbz33nvvvffee++997o7nU4n99//P1xmZAFs9s5K2smeIYCqyB8/fnwfPyK+9+3vv9ia7k73plv06x3z70lpft1bdr/78oR/4X+8z3f37nhfxH99seG7r9vsG0L+/wE9f1OsCQEAAA==
1AFEB7A70CE40743CF3823C609D1C371	1	cxsmiles	JChemExcel8wAAAB+LCAAAAAAABADtvQdgHEmWJSYvbcp7f0r1StfgdKEIgGATJNiQQBDswYjN5pLsHWlHIymrKoHKZVZlXWYWQMztnbz33nvvvffee++997o7nU4n99//P1xmZAFs9s5K2smeIYCqyB8/fnwfPyK+9+3vv9ia7k73plv06x3z70lpft1bdr/78oR/4X+8z3f37nhfeL++6H7w/s3ku28Izf8HaB3uyfMAAAA=
D76EA52322109D4DBB2C8B7ADE9452B5	1	cxsmiles	JChemExcelKgEAAB+LCAAAAAAABADtvQdgHEmWJSYvbcp7f0r1StfgdKEIgGATJNiQQBDswYjN5pLsHWlHIymrKoHKZVZlXWYWQMztnbz33nvvvffee++997o7nU4n99//P1xmZAFs9s5K2smeIYCqyB8/fnwfPyK+9+3vv9ia7k73plv06x3z70lpft1bdr/78oR/4X+8z3f37nhfxH99seG7G399/5fljW9odP8PLfNDDSoBAAA=
07FD49F14C743F6CA0E4D6E56CF6F32E	1	cxsmiles	JChemExcel7QAAAB+LCAAAAAAABADtvQdgHEmWJSYvbcp7f0r1StfgdKEIgGATJNiQQBDswYjN5pLsHWlHIymrKoHKZVZlXWYWQMztnbz33nvvvffee++997o7nU4n99//P1xmZAFs9s5K2smeIYCqyB8/fnwfPyK+9+3vv9ia7k73plv06x3z70lpft1bdr/78oR/4X+8z3f37nhfxH99sdV59xZvCPBvBMH/B25xzhztAAAA
FC9229035CCD4FFE97FC1DD9F3D89F75	1	cxsmiles	JChemExcel4wAAAB+LCAAAAAAABADtvQdgHEmWJSYvbcp7f0r1StfgdKEIgGATJNiQQBDswYjN5pLsHWlHIymrKoHKZVZlXWYWQMztnbz33nvvvffee++997o7nU4n99//P1xmZAFs9s5K2smeIYCqyB8/fnwfPyK+9+3vv9ia7k73ltOtL0+26M87/A/+P93y/qUGe+aDkzL8bnfvjvdq/NcXG77b9MaH4/b/AAnll13jAAAA
0430EE91A88B1835A085A1776B2BB423	1	cxsmiles	JChemExcel4gAAAB+LCAAAAAAABADtvQdgHEmWJSYvbcp7f0r1StfgdKEIgGATJNiQQBDswYjN5pLsHWlHIymrKoHKZVZlXWYWQMztnbz33nvvvffee++997o7nU4n99//P1xmZAFs9s5K2smeIYCqyB8/fnwfPyK+9+3vv9ia7k73plv06x3z70lpft1bdr/78oR/4X+8z3f37nhfxH99seG7XrNvCKv/B/dwyaPiAAAA
67923593A74DC84B80C43E048C8C82AF	1	cxsmiles	JChemExcel7QAAAB+LCAAAAAAABADtvQdgHEmWJSYvbcp7f0r1StfgdKEIgGATJNiQQBDswYjN5pLsHWlHIymrKoHKZVZlXWYWQMztnbz33nvvvffee++997o7nU4n99//P1xmZAFs9s5K2smeIYCqyB8/fnwfPyK+9+3vv9ia7k73plv06x3z70lpft1bdr/78oR/4X+8z3f37nhfxH99seG7TW98Qwj+P56wNMTtAAAA
DC04F82895F9E2AAC84D8EFBBF258681	1	cxsmiles	JChemExcelMgAAAB+LCAAAAAAABADtvQdgHEmWJSYvbcp7f0r1StfgdKEIgGATJNiQQBDswYjN5pLsHWlHIymrKoHKZVZlXWYWQMztnbz33nvvvffee++997o7nU4n99//P1xmZAFs9s5K2smeIYCqyB8/fnwfPyK+9+3vT3enW/TjznTL/tzFzxdbn315h/63Pd1dVkv8Md09+fEX/w/hw90AMgAAAA==
6168068044BE949800CB31254F81011A	1	cxsmiles	JChemExcelSwAAAB+LCAAAAAAABADtvQdgHEmWJSYvbcp7f0r1StfgdKEIgGATJNiQQBDswYjN5pLsHWlHIymrKoHKZVZlXWYWQMztnbz33nvvvffee++997o7nU4n99//P1xmZAFs9s5K2smeIYCqyB8/fnwfPyK+9+3vT3enW/TjjvlXf+7i3+0bvlxWy63PvqS/T378xf8DzxrExksAAAA=
3AE5C0937606F0C347D369A74B742EC6	1	cxsmiles	JChemExcelLQAAAB+LCAAAAAAABADtvQdgHEmWJSYvbcp7f0r1StfgdKEIgGATJNiQQBDswYjN5pLsHWlHIymrKoHKZVZlXWYWQMztnbz33nvvvffee++997o7nU4n99//P1xmZAFs9s5K2smeIYCqyB8/fnwfPyK+9+3vT3enW/TjznTL/OR/d0/KO9vT3WW13PrsS/z54y/+H/VhOGctAAAA
29F7626819941930D5A9475575EA7EDD	1	cxsmiles	JChemExcelUgAAAB+LCAAAAAAABADtvQdgHEmWJSYvbcp7f0r1StfgdKEIgGATJNiQQBDswYjN5pLsHWlHIymrKoHKZVZlXWYWQMztnbz33nvvvffee++997o7nU4n99//P1xmZAFs9s5K2smeIYCqyB8/fnwfPyK+9+3vT3enW1+ebNFvd/gf/P92n/C/u9vT3WW13PrsS/r95Mdf/D8+a0x5UgAAAA==
EF746B811989C1FFF49ECCFF22A26A0C	1	cxsmiles	JChemExcelTwAAAB+LCAAAAAAABADtvQdgHEmWJSYvbcp7f0r1StfgdKEIgGATJNiQQBDswYjN5pLsHWlHIymrKoHKZVZlXWYWQMztnbz33nvvvffee++997o7nU4n99//P1xmZAFs9s5K2smeIYCqyB8/fnwfPyK+9+3vv9iif+6c7H72Yro33ZryX0v+d7p3svXZl3de7HID/kg+35VW2lb/QKv/B2HfYyZPAAAA
8207EE83591726E6B3668159D7CFEA4D	1	cxsmiles	JChemExcelTwAAAB+LCAAAAAAABADtvQdgHEmWJSYvbcp7f0r1StfgdKEIgGATJNiQQBDswYjN5pLsHWlHIymrKoHKZVZlXWYWQMztnbz33nvvvffee++997o7nU4n99//P1xmZAFs9s5K2smeIYCqyB8/fnwfPyK+9+3vv9iif+6c7H72Yro33ZryX0v+d7p3svXZl3de7HID/kg+311Ks+BftPp/ANhGR+hPAAAA
CBEFB9E23FA0B995F332A3AACD91D0A9	1	cxsmiles	JChemExcelUwAAAB+LCAAAAAAABADtvQdgHEmWJSYvbcp7f0r1StfgdKEIgGATJNiQQBDswYjN5pLsHWlHIymrKoHKZVZlXWYWQMztnbz33nvvvffee++997o7nU4n99//P1xmZAFs9s5K2smeIYCqyB8/fnwfPyK+9+3vv9iif+6c7H72Yro33ZryX0v+d7p3svXZl3de7HID/kg+35VW4b8nJX3xvW9///8BaJNDblMAAAA=
555EF4BF3FB8B3C88050F0D01F46D351	1	cxsmiles	JChemExceldQAAAB+LCAAAAAAABADtvQdgHEmWJSYvbcp7f0r1StfgdKEIgGATJNiQQBDswYjN5pLsHWlHIymrKoHKZVZlXWYWQMztnbz33nvvvffee++997o7nU4n99//P1xmZAFs9s5K2smeIYCqyB8/fnwfPyK+9+3vv9iif+6c7H72Yro33ZryX0v+d7p3svXZl3de7HID/kg+35VW5l/96TfzWnde/t63v///AKk8ecd1AAAA
1FD142CA29AB10DA4D54EE8AB19C17AB	1	cxsmiles	JChemExcelfAAAAB+LCAAAAAAABADtvQdgHEmWJSYvbcp7f0r1StfgdKEIgGATJNiQQBDswYjN5pLsHWlHIymrKoHKZVZlXWYWQMztnbz33nvvvffee++997o7nU4n99//P1xmZAFs9s5K2smeIYCqyB8/fnwfPyK+9+3vv9iif+6c7H72Yro33ZryX0v+d7p3svXZl3de7HID/kg+35VW5t8v/e/2wu+8f/e83wHy/wE4yLq3fAAAAA==
DDA802C5CEA54BCDE8AD8DFDE5EC6870	1	cxsmiles	JChemExcelVAAAAB+LCAAAAAAABADtvQdgHEmWJSYvbcp7f0r1StfgdKEIgGATJNiQQBDswYjN5pLsHWlHIymrKoHKZVZlXWYWQMztnbz33nvvvffee++997o7nU4n99//P1xmZAFs9s5K2smeIYCqyB8/fnwfPyK+9+3vv9iif+6c7H72Yro33ZryX0v+d7p3svXZl3de7HID/kg+35VWkX/R9P8BO0mCZ1QAAAA=
E5DE73DE0F37397F18205C25E34411C3	1	cxsmiles	JChemExcelTwAAAB+LCAAAAAAABADtvQdgHEmWJSYvbcp7f0r1StfgdKEIgGATJNiQQBDswYjN5pLsHWlHIymrKoHKZVZlXWYWQMztnbz33nvvvffee++997o7nU4n99//P1xmZAFs9s5K2smeIYCqyB8/fnwfPyK+9+3vv9iif+6c7H72Yro33ZryX0v+d7p3svXZl3de7HID/kg+39VW8kP/Rav/B9WJEkJPAAAA
A5BD983E9F06B05C41F351BA08F22A0D	1	cxsmiles	JChemExcellAAAAB+LCAAAAAAABADtvQdgHEmWJSYvbcp7f0r1StfgdKEIgGATJNiQQBDswYjN5pLsHWlHIymrKoHKZVZlXWYWQMztnbz33nvvvffee++997o7nU4n99//P1xmZAFs9s5K2smeIYCqyB8/fnwfPyK+9+3vT3enW/Tjjv67N92a7uK3E/57q/Pri92Trc++DD7Z4k9e3Iu/MPDrPf7R/XQPPf8/bKh6NpQAAAA=
F5E833984E3D16DDF8D44511ECE40139	1	cxsmiles	JChemExcellQAAAB+LCAAAAAAABADtvQdgHEmWJSYvbcp7f0r1StfgdKEIgGATJNiQQBDswYjN5pLsHWlHIymrKoHKZVZlXWYWQMztnbz33nvvvffee++997o7nU4n99//P1xmZAFs9s5K2smeIYCqyB8/fnwfPyK+9+3vT3enW/Tjjv67N92a7uK3E/57q/Pri92Trc++DD7Zkk/udZsGvz67Q//zP5Hm3XZ76Pr/AVq6v22VAAAA
B3EC2114A90A544CF85F4463DB9F7B18	1	cxsmiles	JChemExcelkwAAAB+LCAAAAAAABADtvQdgHEmWJSYvbcp7f0r1StfgdKEIgGATJNiQQBDswYjN5pLsHWlHIymrKoHKZVZlXWYWQMztnbz33nvvvffee++997o7nU4n99//P1xmZAFs9s5K2smeIYCqyB8/fnwfPyK+9+3vT3enW/Tjjv67N92a7uK3E/57q/Pri92Trc++DD7Zkk/udZsGv4bvaONuqz10/P8AYNQxdpMAAAA=
DDE90082F69ED8743AD85DD76A9DFBDD	1	cxsmiles	JChemExceltgAAAB+LCAAAAAAABADtvQdgHEmWJSYvbcp7f0r1StfgdKEIgGATJNiQQBDswYjN5pLsHWlHIymrKoHKZVZlXWYWQMztnbz33nvvvffee++997o7nU4n99//P1xmZAFs9s5K2smeIYCqyB8/fnwfPyK+9+3vv9ia7k636Jc78u9yumf+PCn1M/13d+/OCf/G/3i/vtiNf36yt/Xllyf3tga+9X69xz86n34Z9rdr2vw/5iC0Y7YAAAA=
EFDFFDB6AACBC36E0F3E692D1E8449B0	1	cxsmiles	JChemExcel5QAAAB+LCAAAAAAABADtvQdgHEmWJSYvbcp7f0r1StfgdKEIgGATJNiQQBDswYjN5pLsHWlHIymrKoHKZVZlXWYWQMztnbz33nvvvffee++997o7nU4n99//P1xmZAFs9s5K2smeIYCqyB8/fnwfPyK+9+3vv9ia7k636Jc78u9yumf+PCn1M/13d+/OyS7/esL/Dvz6Qv7Y29Ty3taXX57sb22Ew7/u84/Op1/eC9rsxdoopt/79vf/HzkqTprlAAAA
EEA402D3EAE17C087119FCD795708F33	1	cxsmiles	JChemExcel1wAAAB+LCAAAAAAABADtvQdgHEmWJSYvbcp7f0r1StfgdKEIgGATJNiQQBDswYjN5pLsHWlHIymrKoHKZVZlXWYWQMztnbz33nvvvffee++997o7nU4n99//P1xmZAFs9s5K2smeIYCqyB8/fnwfPyK+9+3vv9ia7k636Jc78u9yumf+PCn1M/13d+/OyS7/esL/Dvz6Qv7Y29Ty3taXX55seZ/wL52/vT+/vBe8vhdro7h979vf/38AN4V/6dcAAAA=
ECCAE75A22A52281C132624B2943CA53	1	cxsmiles	JChemExcel4gAAAB+LCAAAAAAABADtvQdgHEmWJSYvbcp7f0r1StfgdKEIgGATJNiQQBDswYjN5pLsHWlHIymrKoHKZVZlXWYWQMztnbz33nvvvffee++997o7nU4n99//P1xmZAFs9s5K2smeIYCqyB8/fnwfPyK+9+3vv9ia7k636Jc78u9yumf+PCn1M/13d+/OyS7/esL/Dvz6Ysv7jD/f2/TSva0vvzzpvtID4f788l7w+l6sjaL5vW9///8BTmeEDuIAAAA=
8A11F28C1B51F89E8BF2B0C8680A47D0	1	cxsmiles	JChemExcel3QAAAB+LCAAAAAAABADtvQdgHEmWJSYvbcp7f0r1StfgdKEIgGATJNiQQBDswYjN5pLsHWlHIymrKoHKZVZlXWYWQMztnbz33nvvvffee++997o7nU4n99//P1xmZAFs9s5K2smeIYCqyB8/fnwfPyK+9+3vv9ia7k636Jc78u9yumf+9D+e7u7dOdl6dof+9+zOyS5/dsL/Dvz6Qv7Y29Ty3taXX55seZ/wL52/vT+/vBe8vhdro7h979vf/38AaCY5jN0AAAA=
291B262CD3770769C256A552253ECAB5	1	cxsmiles	JChemExcelwQAAAB+LCAAAAAAABADtvQdgHEmWJSYvbcp7f0r1StfgdKEIgGATJNiQQBDswYjN5pLsHWlHIymrKoHKZVZlXWYWQMztnbz33nvvvffee++997o7nU4n99//P1xmZAFs9s5K2smeIYCqyB8/fnwfPyK+9+3vv9ia7k636Jc78u9yumf+PCn1M/13d+/OCf/G/3i/vtiNf36yt/Xllyf3tryPvhyCMfDrPf7R/XTXfPr/ABNNdhzBAAAA
2E43225D2C813FCDEF01F2CBF36E7D75	1	cxsmiles	JChemExcelmQAAAB+LCAAAAAAABADtvQdgHEmWJSYvbcp7f0r1StfgdKEIgGATJNiQQBDswYjN5pLsHWlHIymrKoHKZVZlXWYWQMztnbz33nvvvffee++997o7nU4n99//P1xmZAFs9s5K2smeIYCqyB8/fnwfPyK+9+3vT3enW/Tjjv67N92a7uK3E/57q/Pri92Trc++DD7Zkk/udZve/Ku80v10D93/P+PNJXWZAAAA
09A2B8829C428542D49E44242F3516BD	1	cxsmiles	JChemExcelKAEAAB+LCAAAAAAABADtvQdgHEmWJSYvbcp7f0r1StfgdKEIgGATJNiQQBDswYjN5pLsHWlHIymrKoHKZVZlXWYWQMztnbz33nvvvffee++997o7nU4n99//P1xmZAFs9s5K2smeIYCqyB8/fnwfPyK+9+3vv9iif+5Md5dT/mU53VtumV939+6c8K/8z8ku//jS++jl1mdf3tnyP4n/enOL/5f9iv9/qQP+3re///8AfGpsJCgBAAA=
9CD76A266B8DDA17182301CC971F822E	1	cxsmiles	JChemExcellQAAAB+LCAAAAAAABADtvQdgHEmWJSYvbcp7f0r1StfgdKEIgGATJNiQQBDswYjN5pLsHWlHIymrKoHKZVZlXWYWQMztnbz33nvvvffee++997o7nU4n99//P1xmZAFs9s5K2smeIYCqyB8/fnwfPyK+9+3vv9g62frsyzvT3enWlydb9MEd/sf7Ff+fbnn/7gV/+f/u7jEg+WS53D3Z/ewFgRdg3M+L3Qj08M//B9cBRKGVAAAA
43FAAC0819E0051761B5A85DD96A7B85	1	cxsmiles	JChemExcelhwAAAB+LCAAAAAAABADtvQdgHEmWJSYvbcp7f0r1StfgdKEIgGATJNiQQBDswYjN5pLsHWlHIymrKoHKZVZlXWYWQMztnbz33nvvvffee++997o7nU4n99//P1xmZAFs9s5K2smeIYCqyB8/fnwfPyK+9+3vv9g62frsyzsnW/T7Hf4n/utrtML/p7tT/sD8+8z8tiv/Lqfbe9OtZjd4ufuS9+/23u7/Ay1icCWHAAAA
313C38DB9119EDFB46247C8E01FFAFCF	1	cxsmiles	JChemExcelhwAAAB+LCAAAAAAABADtvQdgHEmWJSYvbcp7f0r1StfgdKEIgGATJNiQQBDswYjN5pLsHWlHIymrKoHKZVZlXWYWQMztnbz33nvvvffee++997o7nU4n99//P1xmZAFs9s5K2smeIYCqyB8/fnwfPyK+9+3vv9g62frsyzsnu1v0xx38hZ/8j/+rfI3/v0Zz/H+620z5U/13V/5dTrf3plvNrv/66+lu0NT/d3tv9/8B8LHhTYcAAAA=
B211AA8D1E47C5BF30B4EF6B6CB2E36E	1	cxsmiles	JChemExcellQAAAB+LCAAAAAAABADtvQdgHEmWJSYvbcp7f0r1StfgdKEIgGATJNiQQBDswYjN5pLsHWlHIymrKoHKZVZlXWYWQMztnbz33nvvvffee++997o7nU4n99//P1xmZAFs9s5K2smeIYCqyB8/fnwfPyK+9+3vn2x9drJFP+9Md6fys//vLv6lhl/eebE13V1O9wZb7jW7dwTclrwT+/XFlvdH57vvffv7/w+cIYoelQAAAA==
C2F145EB55B55358BBDB1DCBD605ED16	1	cxsmiles	JChemExcelhwAAAB+LCAAAAAAABADtvQdgHEmWJSYvbcp7f0r1StfgdKEIgGATJNiQQBDswYjN5pLsHWlHIymrKoHKZVZlXWYWQMztnbz33nvvvffee++997o7nU4n99//P1xmZAFs9s5K2smeIYCqyB8/fnwfPyK+9+3vT3enW/TjznSrme4+qe+cbH325Z0XW9Pd5XRvuvXlCX/J/0gr/9+T8s50r9m94zWK//piqwMn/PP/ATClDgiHAAAA
71BA540D63C9E1D8C71DC66F385018AF	1	cxsmiles	JChemExcelvAAAAB+LCAAAAAAABADtvQdgHEmWJSYvbcp7f0r1StfgdKEIgGATJNiQQBDswYjN5pLsHWlHIymrKoHKZVZlXWYWQMztnbz33nvvvffee++997o7nU4n99//P1xmZAFs9s5K2smeIYCqyB8/fnwfPyK+9+3vv9g62frsyzsnu3snW/TnHf7n5J788D6RXyOfSFP+ZNf9umd/ne5O+ffp1nK5e7L72Qvq70QhUMcvduM9dX7t//n/AIKda3u8AAAA
668B269E2EA725CE314DEA66FC898A3D	1	cxsmiles	JChemExcelbwAAAB+LCAAAAAAABADtvQdgHEmWJSYvbcp7f0r1StfgdKEIgGATJNiQQBDswYjN5pLsHWlHIymrKoHKZVZlXWYWQMztnbz33nvvvffee++997o7nU4n99//P1xmZAFs9s5K2smeIYCqyB8/fnwfPyK+9+3vv9g62frsyzsnu1v0x50vp3tT/iXy796X2oj/2l1Ot6lts3vnhD/kf15Pdwdf397b/X8AjPhcCG8AAAA=
481EF0869C98F9CA8AD1B7CE600B0A0C	1	cxsmiles	JChemExcellQAAAB+LCAAAAAAABADtvQdgHEmWJSYvbcp7f0r1StfgdKEIgGATJNiQQBDswYjN5pLsHWlHIymrKoHKZVZlXWYWQMztnbz33nvvvffee++997o7nU4n99//P1xmZAFs9s5K2smeIYCqyB8/fnwfPyK+9+3vv9g62frsyzvT3ekW/XXH/Ks/d/HvazTA/9EWH/A/+L/353S3CiDsyr/L6fbedKvZ9Zu+7nbm/bu9t/v/ACvMjB6VAAAA
5330BFC3D5879F200137F51F15D9474F	1	cxsmiles	JChemExcelfgAAAB+LCAAAAAAABADtvQdgHEmWJSYvbcp7f0r1StfgdKEIgGATJNiQQBDswYjN5pLsHWlHIymrKoHKZVZlXWYWQMztnbz33nvvvffee++997o7nU4n99//P1xmZAFs9s5K2smeIYCqyB8/fnwfPyK+9+3vv9g62frsyzvT3ekW/XUn/He6i5+v0QD/P+GP+R/vV266u5xu7023ml3/m9dxqPzv9t7u/wNLBCggfgAAAA==
548D82E2A901C0D99B9866E74FB142C8	1	cxsmiles	JChemExceldgAAAB+LCAAAAAAABADtvQdgHEmWJSYvbcp7f0r1StfgdKEIgGATJNiQQBDswYjN5pLsHWlHIymrKoHKZVZlXWYWQMztnbz33nvvvffee++997o7nU4n99//P1xmZAFs9s5K2smeIYCqyB8/fnwfPyK+9+3vv9g62frsyzvT3Wq69aS+M92iz+gv+Vf/2loud092P3tBLU/4E37lxa78in/109iv/T//H53leIF2AAAA
F0D85155040AF9B4F337A456166F922A	1	cxsmiles	JChemExcelUAAAAB+LCAAAAAAABADtvQdgHEmWJSYvbcp7f0r1StfgdKEIgGATJNiQQBDswYjN5pLsHWlHIymrKoHKZVZlXWYWQMztnbz33nvvvffee++997o7nU4n99//P1xmZAFs9s5K2smeIYCqyB8/fnwfPyK+9+3vv9g62frsyzsnW/T7Hf7n9cnuZy9efCaf8JcvdvHrdHfKH023zE/59KSkVs/u0P+e/T+Nk0KvUAAAAA==
443021C7390B7EBF28A62E83A30E4092	1	cxsmiles	JChemExcelZQAAAB+LCAAAAAAABADtvQdgHEmWJSYvbcp7f0r1StfgdKEIgGATJNiQQBDswYjN5pLsHWlHIymrKoHKZVZlXWYWQMztnbz33nvvvffee++997o7nU4n99//P1xmZAFs9s5K2smeIYCqyB8/fnwfPyK+9+3vv9g62frsyzsnW/T7na3p7pR/ify7K//e9H0Tfnjy4y/+H3uGuUxlAAAA
1082691C372C3FB5165580A2204E42B5	1	cxsmiles	JChemExcelhAAAAB+LCAAAAAAABADtvQdgHEmWJSYvbcp7f0r1StfgdKEIgGATJNiQQBDswYjN5pLsHWlHIymrKoHKZVZlXWYWQMztnbz33nvvvffee++997o7nU4n99//P1xmZAFs9s5K2smeIYCqyB8/fnwfPyK+9+3vT3enW/Tjjvn3ZOuzL++8+Oxk7/X0nvksaHHvxd4J/8b/cPMvgw/sr/j/a3yP/3c+n249qe9Md7/37e//P4/6YzOEAAAA
FB0A6FB211428A0AB6152921F08736E6	1	cxsmiles	JChemExcelmAAAAB+LCAAAAAAABADtvQdgHEmWJSYvbcp7f0r1StfgdKEIgGATJNiQQBDswYjN5pLsHWlHIymrKoHKZVZlXWYWQMztnbz33nvvvffee++997o7nU4n99//P1xmZAFs9s5K2smeIYCqyB8/fnwfPyK+9+3vv9g62frsyzsnW/T7Hf4H/5/uLpfTrdf6Kbd4wb9P95rpvenWdI8/+9J7rQMh/o3/671YW/y/2f1/APb1KvKYAAAA
D43EA332496FCF72CB5306D38FDF3E3D	1	cxsmiles	JChemExceldgAAAB+LCAAAAAAABADtvQdgHEmWJSYvbcp7f0r1StfgdKEIgGATJNiQQBDswYjN5pLsHWlHIymrKoHKZVZlXWYWQMztnbz33nvvvffee++997o7nU4n99//P1xmZAFs9s5K2smeIYCqyB8/fnwfPyK+9+3vn2zRP3c+kx/yL//zYvdk6/V0b8p/TLfMT/53d+/O663PvryD/3uvMKAXJ/h0uhu8ELx89v8AOXPNsnYAAAA=
DF2C476384755F817B504BF94E3EFDFC	1	cxsmiles	JChemExceloAAAAB+LCAAAAAAABADtvQdgHEmWJSYvbcp7f0r1StfgdKEIgGATJNiQQBDswYjN5pLsHWlHIymrKoHKZVZlXWYWQMztnbz33nvvvffee++997o7nU4n99//P1xmZAFs9s5K2smeIYCqyB8/fnwfPyK+9+3vv9g62frsyzvT3ekW/XVH/9378oR/4X+8X7+c7k13uYVpvxe8F8DQn7svFMr7d/P/AAn3UaygAAAA
C1DAE037EB722EDC5C75EA001AFEF87A	1	cxsmiles	JChemExcelhgAAAB+LCAAAAAAABADtvQdgHEmWJSYvbcp7f0r1StfgdKEIgGATJNiQQBDswYjN5pLsHWlHIymrKoHKZVZlXWYWQMztnbz33nvvvffee++997o7nU4n99//P1xmZAFs9s5K2smeIYCqyB8/fnwfPyK+9+3vv9iif+6cbH325Z3p7nSrme5Nd0/4M/3C/vpii1t9Gf+W/9yzvwZglwSU/478u9fs/j9tOFzzhgAAAA==
E84FFDCCAE234598D63DA9586BA08737	1	cxsmiles	JChemExcelVgAAAB+LCAAAAAAABADtvQdgHEmWJSYvbcp7f0r1StfgdKEIgGATJNiQQBDswYjN5pLsHWlHIymrKoHKZVZlXWYWQMztnbz33nvvvffee++997o7nU4n99//P1xmZAFs9s5K2smeIYCqyB8/fnwfPyK+9+3vv9g62frsyzsnW/T7Hf7n9cnuZy9efCaf8JcvdvHrdHfKH5l/p1snJX0orezb3/v29/8f6YVb4FYAAAA=
6A42761C596DA5A461ECE1D83C2D89DA	1	cxsmiles	JChemExcelSwAAAB+LCAAAAAAABADtvQdgHEmWJSYvbcp7f0r1StfgdKEIgGATJNiQQBDswYjN5pLsHWlHIymrKoHKZVZlXWYWQMztnbz33nvvvffee++997o7nU4n99//P1xmZAFs9s5K2smeIYCqyB8/fnwfPyK+9+3vv9g62frsyzsnW/T7Hf7n9cnuZy9efCaf8JcvdvHrdHfKH5l/n9TmV3z9/wA9MUGUSwAAAA==
93208D3338B8D8D9C69DC47390CAC598	1	cxsmiles	JChemExcelYwAAAB+LCAAAAAAABADtvQdgHEmWJSYvbcp7f0r1StfgdKEIgGATJNiQQBDswYjN5pLsHWlHIymrKoHKZVZlXWYWQMztnbz33nvvvffee++997o7nU4n99//P1xmZAFs9s5K2smeIYCqyB8/fnwfPyK+9+3vv9g62frsyzsnW/T7Hf7n9cnuZy9efCaf8JcvdvHrdHfKH5l/v/Te8X71muC1/wcNPcZaYwAAAA==
9ECE3117017BD52DC7363E7A852CDD6A	1	cxsmiles	JChemExcelYAAAAB+LCAAAAAAABADtvQdgHEmWJSYvbcp7f0r1StfgdKEIgGATJNiQQBDswYjN5pLsHWlHIymrKoHKZVZlXWYWQMztnbz33nvvvffee++997o7nU4n99//P1xmZAFs9s5K2smeIYCqyB8/fnwfPyK+9+3vv9g62frsyzvT3ekW/XXH/PvlCf/C/3i/ek125d/ldG+6dVLaF+VffLDX7P4/mPKWVWAAAAA=
A9321D712B9A814B2886B76EEBB57919	1	cxsmiles	JChemExceljQAAAB+LCAAAAAAABADtvQdgHEmWJSYvbcp7f0r1StfgdKEIgGATJNiQQBDswYjN5pLsHWlHIymrKoHKZVZlXWYWQMztnbz33nvvvffee++997o7nU4n99//P1xmZAFs9s5K2smeIYCqyB8/fnwfPyK+9+3vv9g62frsyzsnW/T7Hf5nuttM5Rf9U/6dblXTveCLoNHeHYbzQv8Mm/iQvJ68X7/37e//P25cqvyNAAAA
3824720AE4EB92F3373CB530E5A448FB	1	cxsmiles	JChemExceltAAAAB+LCAAAAAAABADtvQdgHEmWJSYvbcp7f0r1StfgdKEIgGATJNiQQBDswYjN5pLsHWlHIymrKoHKZVZlXWYWQMztnbz33nvvvffee++997o7nU4n99//P1xmZAFs9s5K2smeIYCqyB8/fnwfPyK+9+3vT3enW/TjznSvmW4tp3vTrenuCX/C/+D/nT9fbJ1sffblHfvi1pedBoOf73agxX8F/A39/z9J0IfptAAAAA==
36516CB6C6AC737DE3A65B49A3B9B669	1	cxsmiles	JChemExcelmQAAAB+LCAAAAAAABADtvQdgHEmWJSYvbcp7f0r1StfgdKEIgGATJNiQQBDswYjN5pLsHWlHIymrKoHKZVZlXWYWQMztnbz33nvvvffee++997o7nU4n99//P1xmZAFs9s5K2smeIYCqyB8/fnwfPyK+9+3vv9ia7i6nWy/2Trborzv8j/frl/7He/wD/5/uTfn35XJrurfc9d/oAPB+ne7qS/KXgoj8u7v3/wBD/jbYmQAAAA==
6D178F3E867661C16CA87512197246A1	1	cxsmiles	JChemExceliAAAAB+LCAAAAAAABADtvQdgHEmWJSYvbcp7f0r1StfgdKEIgGATJNiQQBDswYjN5pLsHWlHIymrKoHKZVZlXWYWQMztnbz33nvvvffee++997o7nU4n99//P1xmZAFs9s5K2smeIYCqyB8/fnwfPyK+9+3vv9g62frsyzvT3ekW/XVnunVS3jG/8r+7X57wL/yPfGK+39zuxa73QfzX17vo+7Mv/x/RYR0KiAAAAA==
F5EFD790AD3220BC498CA9446CD8FF92	1	cxsmiles	JChemExcelfQAAAB+LCAAAAAAABADtvQdgHEmWJSYvbcp7f0r1StfgdKEIgGATJNiQQBDswYjN5pLsHWlHIymrKoHKZVZlXWYWQMztnbz33nvvvffee++997o7nU4n99//P1xmZAFs9s5K2smeIYCqyB8/fnwfPyK+9+3vv9g62frsyzsnu1v0x53p3lR+9v/d+3LDl7t7d074N/1zSc/u9nQ3bHpS2vbf+/b3/x/LUwQdfQAAAA==
3849C14F074092B364C33905444966C8	1	cxsmiles	JChemExcelmQAAAB+LCAAAAAAABADtvQdgHEmWJSYvbcp7f0r1StfgdKEIgGATJNiQQBDswYjN5pLsHWlHIymrKoHKZVZlXWYWQMztnbz33nvvvffee++997o7nU4n99//P1xmZAFs9s5K2smeIYCqyB8/fnwfPyK+9+3vn2x9drJFP+9Md6fys//v7kl5h9p9eefF1nR3Od3Tj+99KW/yP19O7+nHe83uHe+L+K8vtrw/Ot9979vf/38ArHF4wJkAAAA=
0969724B6F7EDE8198D7DB5D0853E82A	1	cxsmiles	JChemExcelvwAAAB+LCAAAAAAABADtvQdgHEmWJSYvbcp7f0r1StfgdKEIgGATJNiQQBDswYjN5pLsHWlHIymrKoHKZVZlXWYWQMztnbz33nvvvffee++997o7nU4n99//P1xmZAFs9s5K2smeIYCqyB8/fnwfPyK+9+3vv9g62frsyzsnW/T7Hf5Hf53uTvmXyL+78u/N31fTveFGe3e45xf6Z9iE/mMoHl79P/8fRKejw78AAAA=
CF1E491B5AAC19A5796C578C4AAD4BFE	1	cxsmiles	JChemExcelqQAAAB+LCAAAAAAABADtvQdgHEmWJSYvbcp7f0r1StfgdKEIgGATJNiQQBDswYjN5pLsHWlHIymrKoHKZVZlXWYWQMztnbz33nvvvffee++997o7nU4n99//P1xmZAFs9s5K2smeIYCqyB8/fnwfPyK+9+3vv9g62frsyzsnu1v0x53p3lR+9v/d+3LDl7t79P/pVrW5Cff0Qv/sAD/hX/gf71f0ufu9b3///wGG/NuVqQAAAA==
7DF0EF3D1E178561EA2C6436828C46F8	1	cxsmiles	JChemExcelZwAAAB+LCAAAAAAABADtvQdgHEmWJSYvbcp7f0r1StfgdKEIgGATJNiQQBDswYjN5pLsHWlHIymrKoHKZVZlXWYWQMztnbz33nvvvffee++997o7nU4n99//P1xmZAFs9s5K2smeIYCqyB8/fnwfPyK+9+3vv9g62frsyzvT3Wo53Zru0id3TrbwL/+D/093p1vVdG/KH0T+3d27wyC+9N4LQfw/nWKC1mcAAAA=
792CF4B321FCDA89EF4E6AEB96084EED	1	cxsmiles	JChemExcelZAAAAB+LCAAAAAAABADtvQdgHEmWJSYvbcp7f0r1StfgdKEIgGATJNiQQBDswYjN5pLsHWlHIymrKoHKZVZlXWYWQMztnbz33nvvvffee++997o7nU4n99//P1xmZAFs9s5K2smeIYCqyB8/fnwfPyK+9+3vn/z4yckW/bzD/7zYPdl6Pd2b8h/TLfOT/93du/N667Mv7+D/L/gj/P+zFyf4YLpbLan9Lj7y4H3v29//fwBMuVBuZAAAAA==
4FBA50E912B1A3BDAE7BC8D97D1F4D0C	1	cxsmiles	JChemExcelhwAAAB+LCAAAAAAABADtvQdgHEmWJSYvbcp7f0r1StfgdKEIgGATJNiQQBDswYjN5pLsHWlHIymrKoHKZVZlXWYWQMztnbz33nvvvffee++997o7nU4n99//P1xmZAFs9s5K2smeIYCqyB8/fnwfPyK+9+3vv9g62frsyzsnu5+dbNGfd+Rf/eOFfLRLDaa7y+nWlP9udrWVvkDfvtid7smXkX/3/Na7Xi/8z/e+/f3/BxoGREaHAAAA
915B008739270B0BF5551CE10EE77816	1	cxsmiles	JChemExcelfgAAAB+LCAAAAAAABADtvQdgHEmWJSYvbcp7f0r1StfgdKEIgGATJNiQQBDswYjN5pLsHWlHIymrKoHKZVZlXWYWQMztnbz33nvvvffee++997o7nU4n99//P1xmZAFs9s5K2smeIYCqyB8/fnwfPyK+9+3vv9g62frsyzsnu5+dbNGfd+Rf/eOFfLRLDaa7y+nWlP9udrWVvkDfSsPprjTQf/e+DJrZX7+c7k13v/ft7/8/VKUAwn4AAAA=
B20428869413CAC4B941A763817650C9	1	cxsmiles	JChemExcelbgAAAB+LCAAAAAAABADtvQdgHEmWJSYvbcp7f0r1StfgdKEIgGATJNiQQBDswYjN5pLsHWlHIymrKoHKZVZlXWYWQMztnbz33nvvvffee++997o7nU4n99//P1xmZAFs9s5K2smeIYCqyB8/fnwfPyK+9+3vv9g62frsyzsnu5+dbNGfd17wv/IZ//rZyS5+THeX060pf9Ls6leuqXnLfjrdbaSx/gsY/w9IAaewbgAAAA==
288D5A389D30D696F1FBD80267E9858E	1	cxsmiles	JChemExcellQAAAB+LCAAAAAAABADtvQdgHEmWJSYvbcp7f0r1StfgdKEIgGATJNiQQBDswYjN5pLsHWlHIymrKoHKZVZlXWYWQMztnbz33nvvvffee++997o7nU4n99//P1xmZAFs9s5K2smeIYCqyB8/fnwfPyK+9+3vv9g62frsyzsnW/T7Hf7H+/XFrvzx2Yvp3nRryr8vl3snW14b/qXzd/fP3bCH6a6Aivy7e1L+P+EEWM2VAAAA
6360C342E5E35669D8F21F0A9104C890	1	cxsmiles	JChemExcelkAAAAB+LCAAAAAAABADtvQdgHEmWJSYvbcp7f0r1StfgdKEIgGATJNiQQBDswYjN5pLsHWlHIymrKoHKZVZlXWYWQMztnbz33nvvvffee++997o7nU4n99//P1xmZAFs9s5K2smeIYCqyB8/fnwfPyK+9+3vv9g62frsyzsnW/T7Hf7H+/XFrvzx2Yvp3nRryr8vl3snW14b/qXzd/fPXephuivv6797X3qNviTwu9/79vf/HwEnzCmQAAAA
B629BAAF02D4678A14FC7C293E6ABB05	1	cxsmiles	JChemExcelbgAAAB+LCAAAAAAABADtvQdgHEmWJSYvbcp7f0r1StfgdKEIgGATJNiQQBDswYjN5pLsHWlHIymrKoHKZVZlXWYWQMztnbz33nvvvffee++997o7nU4n99//P1xmZAFs9s5K2smeIYCqyB8/fnwfPyK+9+3vv9g62frsyzsnW/T7Hf7H+/XFrvzx2Yvp3nRryr8vl3vb+Au/R/7dYxC7BHK6u/S/aXb/H4VDL1BuAAAA
B7416EC68FE4AA39290CD2104DE4C8CC	1	cxsmiles	JChemExcelnwAAAB+LCAAAAAAABADtvQdgHEmWJSYvbcp7f0r1StfgdKEIgGATJNiQQBDswYjN5pLsHWlHIymrKoHKZVZlXWYWQMztnbz33nvvvffee++997o7nU4n99//P1xmZAFs9s5K2smeIYCqyB8/fnwfPyK+9+3vT3enW/TjznTryxP+hf+J//p667Mv7+D/L/b6DbxP4hC6Dfbsr4rBno/Bl9Pdvf8HcSEYNp8AAAA=
874BED8FE39F6B1D6F7281220EE99089	1	cxsmiles	JChemExcelsgAAAB+LCAAAAAAABADtvQdgHEmWJSYvbcp7f0r1StfgdKEIgGATJNiQQBDswYjN5pLsHWlHIymrKoHKZVZlXWYWQMztnbz33nvvvffee++997o7nU4n99//P1xmZAFs9s5K2smeIYCqyB8/fnwfPyK+9+3vv9g62frsyzvT3ekW/XXH/Ks/d/HvazTA/9EWH/A/+L/358ku//jS/6j3rcAMe9L+uKft6e5yuhf7nv/dq3b/H7wR6EyyAAAA
23D913BCC0361BDB32735D008448A740	1	cxsmiles	JChemExceliwAAAB+LCAAAAAAABADtvQdgHEmWJSYvbcp7f0r1StfgdKEIgGATJNiQQBDswYjN5pLsHWlHIymrKoHKZVZlXWYWQMztnbz33nvvvffee++997o7nU4n99//P1xmZAFs9s5K2smeIYCqyB8/fnwfPyK+9+3vv9g62frsyzsnW/T7Hf7H+/U1vsL/p7tT/iDy7678az5rprsM8EsPDP6/fQOI/weJVCrSiwAAAA==
0236F72ED1B6BC4AC4FE08AF1410F2DD	1	cxsmiles	JChemExcelqwAAAB+LCAAAAAAABADtvQdgHEmWJSYvbcp7f0r1StfgdKEIgGATJNiQQBDswYjN5pLsHWlHIymrKoHKZVZlXWYWQMztnbz33nvvvffee++997o7nU4n99//P1xmZAFs9s5K2smeIYCqyB8/fnwfPyK+9+3vn2zRP3c+kx/yL//zYsv7I2iE/7/e+uzLO/j/dHfKH5p/9eeuvEUNXugHy+letOVes2u69TrsIPO9b3///wEo9WnzqwAAAA==
E169516A0592D978F242FCE5A79D4F87	1	cxsmiles	JChemExcelpQAAAB+LCAAAAAAABADtvQdgHEmWJSYvbcp7f0r1StfgdKEIgGATJNiQQBDswYjN5pLsHWlHIymrKoHKZVZlXWYWQMztnbz33nvvvffee++997o7nU4n99//P1xmZAFs9s5K2smeIYCqyB8/fnwfPyK+9+3vv9g62frsyzvT3ekW/XXH/Ks/d/HvazTA/9EWH/A/+L/358ku//jS/6j3rcBcTvcU/L2B5l9O72mLvWb3/wGIvQ6PpQAAAA==
444261D2F2CAD2F26613DE55020A84F1	1	cxsmiles	JChemExceluQAAAB+LCAAAAAAABADtvQdgHEmWJSYvbcp7f0r1StfgdKEIgGATJNiQQBDswYjN5pLsHWlHIymrKoHKZVZlXWYWQMztnbz33nvvvffee++997o7nU4n99//P1xmZAFs9s5K2smeIYCqyB8/fnwfPyK+9+3vv9g62frsyzvT3ekW/XXH/Ks/d/HvazTA/19sdZt5/3LTE/59q/OrfN9M9wju7olAijSJv+z/umfa/j/rYDJ1uQAAAA==
5C53C4B8E58BE8ED6E34D2084ACC96F7	1	cxsmiles	JChemExceliwAAAB+LCAAAAAAABADtvQdgHEmWJSYvbcp7f0r1StfgdKEIgGATJNiQQBDswYjN5pLsHWlHIymrKoHKZVZlXWYWQMztnbz33nvvvffee++997o7nU4n99//P1xmZAFs9s5K2smeIYCqyB8/fnwfPyK+9+3vv9g62frsyzvT3ekW/XXH/PvlCf/C/3if7/Y+310up1uvvU8Z3Av91X463Qvhe//unZR3mt3/B+wGF1iLAAAA
2BEC883314F7A92810C3A003C9F3BDE5	1	cxsmiles	JChemExcelfQAAAB+LCAAAAAAABADtvQdgHEmWJSYvbcp7f0r1StfgdKEIgGATJNiQQBDswYjN5pLsHWlHIymrKoHKZVZlXWYWQMztnbz33nvvvffee++997o7nU4n99//P1xmZAFs9s5K2smeIYCqyB8/fnwfPyK+9+3vv9g62frsyzsnW/T7Hf5nujuVn/rvM/Pbrvy7XE63Xnvt+f0X0mTPvHRS2vfliy+9N/D/Zvf/AT0lJ8h9AAAA
E5457D88E52AB3DD22A0B1D043631728	1	cxsmiles	JChemExcelUAAAAB+LCAAAAAAABADtvQdgHEmWJSYvbcp7f0r1StfgdKEIgGATJNiQQBDswYjN5pLsHWlHIymrKoHKZVZlXWYWQMztnbz33nvvvffee++997o7nU4n99//P1xmZAFs9s5K2smeIYCqyB8/fnwfPyK+9+3vv9g62frsyzsnW/T7Hf7n9cnuZy9efCaf8JcvdvHrdHe5nG699lp6v+L/ze7/AyWzIplQAAAA
FC45874B40C58DE9CAA37821F17B11E3	1	cxsmiles	JChemExcelggAAAB+LCAAAAAAABADtvQdgHEmWJSYvbcp7f0r1StfgdKEIgGATJNiQQBDswYjN5pLsHWlHIymrKoHKZVZlXWYWQMztnbz33nvvvffee++997o7nU4n99//P1xmZAFs9s5K2smeIYCqyB8/fnwfPyK+9+3vv9g62frsyzvT3Wa6tZzunmzRZ3f4H/x/e7o75T8i/+7Kv7Hv5Tt6eTnde+2B9H5d7nGj/wc5veGsggAAAA==
7E0E5A726D7F9BE0BA30CA2B2457C280	1	cxsmiles	JChemExcelzgAAAB+LCAAAAAAABADtvQdgHEmWJSYvbcp7f0r1StfgdKEIgGATJNiQQBDswYjN5pLsHWlHIymrKoHKZVZlXWYWQMztnbz33nvvvffee++997o7nU4n99//P1xmZAFs9s5K2smeIYCqyB8/fnwfPyK+9+3vv9g62frsyzvT3ekW/XXH/PvlCf/C/3i/3vzlrvwbQnshP/eW0y3z0XKv+yowGQK7CRvb7f8Df/P4ks4AAAA=
EEE85734E402FD6D68A792B24C964BE8	1	cxsmiles	JChemExcelnAAAAB+LCAAAAAAABADtvQdgHEmWJSYvbcp7f0r1StfgdKEIgGATJNiQQBDswYjN5pLsHWlHIymrKoHKZVZlXWYWQMztnbz33nvvvffee++997o7nU4n99//P1xmZAFs9s5K2smeIYCqyB8/fnwfPyK+9+3vv9g62frsyzvT3enWszvTLfok/Hf3GX/nf/5Cfu4tp1vmo+XenRP+lf/B/wHXftD5bvgb0+n3vv39/wesXpp8nAAAAA==
BA78ACDC48930174AC3E2B91BD57E56F	1	cxsmiles	JChemExcellQAAAB+LCAAAAAAABADtvQdgHEmWJSYvbcp7f0r1StfgdKEIgGATJNiQQBDswYjN5pLsHWlHIymrKoHKZVZlXWYWQMztnbz33nvvvffee++997o7nU4n99//P1xmZAFs9s5K2smeIYCqyB8/fnwfPyK+9+3vv9g62frsyzvT3Wa6RX/e0X935d/gs60X8nNvOd0yHy337pzwr/wP/g+A9oPOd8PfeN3+PyTFfW2VAAAA
DF4EC8B05355745ED0FC7E6ECD3181FC	1	cxsmiles	JChemExcelugAAAB+LCAAAAAAABADtvQdgHEmWJSYvbcp7f0r1StfgdKEIgGATJNiQQBDswYjN5pLsHWlHIymrKoHKZVZlXWYWQMztnbz33nvvvffee++997o7nU4n99//P1xmZAFs9s5K2smeIYCqyB8/fnwfPyK+9+3vv9ia7i6nW9Mt+v3OdGu5e+eEf+V/8P8XW94Hne+Gv5nuGojy7wv++Xrrsy/v4P/TvfBr/bk3DN9rvfu9b3///wFcZidnugAAAA==
831697D07C41068472E41C54802A4269	1	cxsmiles	JChemExceleQAAAB+LCAAAAAAABADtvQdgHEmWJSYvbcp7f0r1StfgdKEIgGATJNiQQBDswYjN5pLsHWlHIymrKoHKZVZlXWYWQMztnbz33nvvvffee++997o7nU4n99//P1xmZAFs9s5K2smeIYCqyB8/fnwfPyK+9+3vv9g62frsyzvT3ekW/XVnunVS3jG/8r+7+MB+6/873cXP7enuckl/aGv8+xoQ8f8T/pD/8X793re///8A4Icy93kAAAA=
A8B51FF285D1460C4A9A77BB51E7CB36	1	cxsmiles	JChemExcelfQAAAB+LCAAAAAAABADtvQdgHEmWJSYvbcp7f0r1StfgdKEIgGATJNiQQBDswYjN5pLsHWlHIymrKoHKZVZlXWYWQMztnbz33nvvvffee++997o7nU4n99//P1xmZAFs9s5K2smeIYCqyB8/fnwfPyK+9+3vv9g62frsyzvT3ekW/XUn8u/uydazO/S/Z3dO+AP+x/v1y+nucrk33Voup3vmFfy7vQnm9779/f8HuZXZfH0AAAA=
1D13503B8A659D48FC3EECC2621ED58D	1	cxsmiles	JChemExcelkQAAAB+LCAAAAAAABADtvQdgHEmWJSYvbcp7f0r1StfgdKEIgGATJNiQQBDswYjN5pLsHWlHIymrKoHKZVZlXWYWQMztnbz33nvvvffee++997o7nU4n99//P1xmZAFs9s5K2smeIYCqyB8/fnwfPyK+9+3vT3eX0y36ecf8O93Fz236nL7QD/mjF7sn/Bf/4/36Yutk67Mv6RPvM/6l8/fwnye75tP/B0uZOPWRAAAA
016751C585732CDCA66C1EE214D0419B	1	cxsmiles	JChemExceltQAAAB+LCAAAAAAABADtvQdgHEmWJSYvbcp7f0r1StfgdKEIgGATJNiQQBDswYjN5pLsHWlHIymrKoHKZVZlXWYWQMztnbz33nvvvffee++997o7nU4n99//P1xmZAFs9s5K2smeIYCqyB8/fnwfPyK+9+3vT3eX0y36eWe6pT938e82fb4MP3qxe8J/8T/ery+2TrY++9L/xP91r/fJjb/KK91Pd82n/w+oXjYktQAAAA==
810949E5FD26B9501A71EAE8774ECB57	1	cxsmiles	JChemExcelfwAAAB+LCAAAAAAABADtvQdgHEmWJSYvbcp7f0r1StfgdKEIgGATJNiQQBDswYjN5pLsHWlHIymrKoHKZVZlXWYWQMztnbz33nvvvffee++997o7nU4n99//P1xmZAFs9s5K2smeIYCqyB8/fnwfPyK+9+3vT3eX063pFv12R//dxb/b9Ln7gj96sXvCf/E/3q8vtk62PvvyznQvgOL/u/fMb3+yyz++9+3v/z++4pzifwAAAA==
09FC5FAA7AEE6AD68B387AD9054FCFA8	1	cxsmiles	JChemExcelZgAAAB+LCAAAAAAABADtvQdgHEmWJSYvbcp7f0r1StfgdKEIgGATJNiQQBDswYjN5pLsHWlHIymrKoHKZVZlXWYWQMztnbz33nvvvffee++997o7nU4n99//P1xmZAFs9s5K2smeIYCqyB8/fnwfPyK+9+3vv9iif+6cbH325Z3p7pT/mG41093o5/h3udw94V/4H/x/O2wQ/Lv7vW9///8BatuVzWYAAAA=
68D9BA6CC9C06D935773B5F705B42172	1	cxsmiles	JChemExcelgQAAAB+LCAAAAAAABADtvQdgHEmWJSYvbcp7f0r1StfgdKEIgGATJNiQQBDswYjN5pLsHWlHIymrKoHKZVZlXWYWQMztnbz33nvvvffee++997o7nU4n99//P1xmZAFs9s5K2smeIYCqyB8/fnwfPyK+9+3vv9g62frsyzvT3ekW/XVnunVS3jG/8r+7X57wL/wP/u/96f365XR3udybbi2X0z3zJv7ddpDl32cW8Pe+/f3/B875NP2BAAAA
D786FC1C85101F661378E7018295D3E4	1	cxsmiles	JChemExcelfgAAAB+LCAAAAAAABADtvQdgHEmWJSYvbcp7f0r1StfgdKEIgGATJNiQQBDswYjN5pLsHWlHIymrKoHKZVZlXWYWQMztnbz33nvvvffee++997o7nU4n99//P1xmZAFs9s5K2smeIYCqyB8/fnwfPyK+9+3vT3er6dZ0i367M93Fv9vT3eUy/OjF7gn/xf94v77Y8j/f5R/4/+utz768g/9PdxVM/9/dk/L/AS92MzR+AAAA
0D71B69DD2CAB8E964C2E0585656A50B	1	cxsmiles	JChemExcelXwAAAB+LCAAAAAAABADtvQdgHEmWJSYvbcp7f0r1StfgdKEIgGATJNiQQBDswYjN5pLsHWlHIymrKoHKZVZlXWYWQMztnbz33nvvvffee++997o7nU4n99//P1xmZAFs9s5K2smeIYCqyB8/fnwfPyK+9+3vv9g62frsyzvT3ekW/XVH/l0ud0/4F/6HP99dTrf3plvN7h3vm9fha8G/23u7/w+E1FgzXwAAAA==
701D31334AB26001E9F848F96172EC4A	1	cxsmiles	JChemExcellwAAAB+LCAAAAAAABADtvQdgHEmWJSYvbcp7f0r1StfgdKEIgGATJNiQQBDswYjN5pLsHWlHIymrKoHKZVZlXWYWQMztnbz33nvvvffee++997o7nU4n99//P1xmZAFs9s5K2smeIYCqyB8/fnwfPyK+9+3vT3eX060vT7bo1zv8j/cr/j/dmvLv01358rMv77zYjTd/sTXdWy7tC3v4d3u6p3/qvyel+XWv8/rJrun0/wGvA2FylwAAAA==
4AAE08005E977DAC11A953AA217126DE	1	cxsmiles	JChemExceldAAAAB+LCAAAAAAABADtvQdgHEmWJSYvbcp7f0r1StfgdKEIgGATJNiQQBDswYjN5pLsHWlHIymrKoHKZVZlXWYWQMztnbz33nvvvffee++997o7nU4n99//P1xmZAFs9s5K2smeIYCqyB8/fnwfPyK+9+3vv9g62frsyzsnu5+dbNGfd+Rf/eOFfLRLDaa7y+nWlP9udrWVvkDfakP36XRX2sq/S/1j93vf/v7/A5rRH3N0AAAA
E81BA955212352BD47F503A6CA5F546F	1	cxsmiles	JChemExcelewAAAB+LCAAAAAAABADtvQdgHEmWJSYvbcp7f0r1StfgdKEIgGATJNiQQBDswYjN5pLsHWlHIymrKoHKZVZlXWYWQMztnbz33nvvvffee++997o7nU4n99//P1xmZAFs9s5K2smeIYCqyB8/fnwfPyK+9+3vv9g62frsyzsnu1v0x50X/K98wr/K3/Il/j/dXU63pvxnsxu0wTvmdfspN+df/H93v/ft7/8/rnVqfXsAAAA=
75AC27FB399DC1D4004C063D388ACE20	1	cxsmiles	JChemExceltQAAAB+LCAAAAAAABADtvQdgHEmWJSYvbcp7f0r1StfgdKEIgGATJNiQQBDswYjN5pLsHWlHIymrKoHKZVZlXWYWQMztnbz33nvvvffee++997o7nU4n99//P1xmZAFs9s5K2smeIYCqyB8/fnwfPyK+9+3vv9g62frsyzsnu1v0x50vp3tT/iXy796X2oj/2m3QdLrLb395wl/wP96vnT9Ptl7Iz72t4Ub8y8av/x8TkQ4NtQAAAA==
4A7F8B8A1321983875A3393116A85B4F	1	cxsmiles	JChemExcelugAAAB+LCAAAAAAABADtvQdgHEmWJSYvbcp7f0r1StfgdKEIgGATJNiQQBDswYjN5pLsHWlHIymrKoHKZVZlXWYWQMztnbz33nvvvffee++997o7nU4n99//P1xmZAFs9s5K2smeIYCqyB8/fnwfPyK+9+3vv9g62frsyzsnW/T7Hf7ny+nulH+J/LvrtcP/vT+9X18DIv7/wm/v/YpO7R/TvcHu9rp97Jqe/x8sZQafugAAAA==
738665A8033B9E2C812612F042A1A3A6	1	cxsmiles	JChemExcelkwAAAB+LCAAAAAAABADtvQdgHEmWJSYvbcp7f0r1StfgdKEIgGATJNiQQBDswYjN5pLsHWlHIymrKoHKZVZlXWYWQMztnbz33nvvvffee++997o7nU4n99//P1xmZAFs9s5K2smeIYCqyB8/fnwfPyK+9+3vT3enW/Tjjvn39Qn/wv8Ev3725Z0XW9O95fTedOuktO29f+81e+Er9tcXW94fne88ALvf+/b3/x/h0pB/kwAAAA==
C489BF2870337C9EBA7CEE49E7F63069	1	cxsmiles	JChemExcelpAAAAB+LCAAAAAAABADtvQdgHEmWJSYvbcp7f0r1StfgdKEIgGATJNiQQBDswYjN5pLsHWlHIymrKoHKZVZlXWYWQMztnbz33nvvvffee++997o7nU4n99//P1xmZAFs9s5K2smeIYCqyB8/fnwfPyK+9+3vT3enW/Tjjvn3yxP+hf8Jfv3syzsvtqZ7y+k9bbrvN/1yuq8f32v2whdjv77Y8v7ofOdhs/u9b3///wGRC53TpAAAAA==
095375634DF0267CC28F9011C51CB202	1	cxsmiles	JChemExcelowAAAB+LCAAAAAAABADtvQdgHEmWJSYvbcp7f0r1StfgdKEIgGATJNiQQBDswYjN5pLsHWlHIymrKoHKZVZlXWYWQMztnbz33nvvvffee++997o7nU4n99//P1xmZAFs9s5K2smeIYCqyB8/fnwfPyK+9+3vT3eb6dZ0i367M93Fv9vT3eV0Tz/p/0vfSLuTrc++vPNiS1s/i7ZtdqkZft2SN2K/vtjy/uh8971vf///AeEo6aOjAAAA
9F9C8128C65F4F6AEE29DB1F91049A4B	1	cxsmiles	JChemExcelswAAAB+LCAAAAAAABADtvQdgHEmWJSYvbcp7f0r1StfgdKEIgGATJNiQQBDswYjN5pLsHWlHIymrKoHKZVZlXWYWQMztnbz33nvvvffee++997o7nU4n99//P1xmZAFs9s5K2smeIYCqyB8/fnwfPyK+9+3vv9ia7i6nW9Mt+v3OdGu5e+eEf+V/8P8Xu94H3q9f+h/v2ubTXQNK/n3BP19vffblHfx/ume+OCnv2G73fGCdfjxgu9/79vf/HwM9nl6zAAAA
3B105B3D79C048F9A20AD29D3DB9373D	1	cxsmiles	JChemExcelbgAAAB+LCAAAAAAABADtvQdgHEmWJSYvbcp7f0r1StfgdKEIgGATJNiQQBDswYjN5pLsHWlHIymrKoHKZVZlXWYWQMztnbz33nvvvffee++997o7nU4n99//P1xmZAFs9s5K2smeIYCqyB8/fnwfPyK+9+3vn2zRP3f4n5OtL7882Tr58Rd3+J+TXf3UaxD9Vdrx397HnVbf+/b3/x+cIrKSbgAAAA==
58E5DE403E1651E6685AFCD405CCD6C7	1	cxsmiles	JChemExceljgAAAB+LCAAAAAAABADtvQdgHEmWJSYvbcp7f0r1StfgdKEIgGATJNiQQBDswYjN5pLsHWlHIymrKoHKZVZlXWYWQMztnbz33nvvvffee++997o7nU4n99//P1xmZAFs9s5K2smeIYCqyB8/fnwfPyK+9+3vn2zRP3f4n5PdvS+/PNn68svdO1vex/zVnrTwGvu/fvblnRe7Q1/e9Ouu6eX/Ablf8dOOAAAA
FCDE701456ABDF0BA03DCC21A31CABE6	1	cxsmiles	JChemExcelgQAAAB+LCAAAAAAABADtvQdgHEmWJSYvbcp7f0r1StfgdKEIgGATJNiQQBDswYjN5pLsHWlHIymrKoHKZVZlXWYWQMztnbz33nvvvffee++997o7nU4n99//P1xmZAFs9s5K2smeIYCqyB8/fnwfPyK+9+3vT3enW/TjznTL/OR/d0/KOyf8K/9zsvXllydb3gf8S+fv3tc//oI+++zLO18GkPxG/w9PwKz8gQAAAA==
E318B158FAF331C0DD9F449707810E76	1	cxsmiles	JChemExceljgAAAB+LCAAAAAAABADtvQdgHEmWJSYvbcp7f0r1StfgdKEIgGATJNiQQBDswYjN5pLsHWlHIymrKoHKZVZlXWYWQMztnbz33nvvvffee++997o7nU4n99//P1xmZAFs9s5K2smeIYCqyB8/fnwfPyK+9+3vv9g62frsyzsnW/T7Hf7H/3VXfuxtffkl/f7ll3v+t53G/gtxaJv6+N63v///AL8JEoqOAAAA
A317FE3EAC3057A4BC0E6868680CE788	1	cxsmiles	JChemExceldQAAAB+LCAAAAAAABADtvQdgHEmWJSYvbcp7f0r1StfgdKEIgGATJNiQQBDswYjN5pLsHWlHIymrKoHKZVZlXWYWQMztnbz33nvvvffee++997o7nU4n99//P1xmZAFs9s5K2smeIYCqyB8/fnwfPyK+9+3vT3enW/Tjjv67Z/7qfLqLnyf815b+wD/86S7/erK39eWX9PuXX+6ZhrZF8Of/A7J1NUV1AAAA
AB0040D66E7B8D2D4CE9E933B26DFDAC	1	cxsmiles	JChemExcelcAAAAB+LCAAAAAAABADtvQdgHEmWJSYvbcp7f0r1StfgdKEIgGATJNiQQBDswYjN5pLsHWlHIymrKoHKZVZlXWYWQMztnbz33nvvvffee++997o7nU4n99//P1xmZAFs9s5K2smeIYCqyB8/fnwfPyK+9+3vT3enW/TjznTL/OR/d0/4J/+D/+uf3U93+deTva0vv6Tfv/xyzzTsvKd//j+09LIHcAAAAA==
A272F0B3E41FE15A108E4186BE5B9804	1	cxsmiles	JChemExcelZAAAAB+LCAAAAAAABADtvQdgHEmWJSYvbcp7f0r1StfgdKEIgGATJNiQQBDswYjN5pLsHWlHIymrKoHKZVZlXWYWQMztnbz33nvvvffee++997o7nU4n99//P1xmZAFs9s5K2smeIYCqyB8/fnwfPyK+9+3vT3enW/TjznTL/OR/d0/KOyf865b+wD/4/8ku/3qyt/Xll/T7l1/umYa2RfDn/wPG5/gYZAAAAA==
68C5F47342B7FA24EB6656EAE309CFF7	1	cxsmiles	JChemExcelZQAAAB+LCAAAAAAABADtvQdgHEmWJSYvbcp7f0r1StfgdKEIgGATJNiQQBDswYjN5pLsHWlHIymrKoHKZVZlXWYWQMztnbz33nvvvffee++997o7nU4n99//P1xmZAFs9s5K2smeIYCqyB8/fnwfPyK+9+3vT3enW/TjjvlXf+7i3xP+fUt/4B/+dJd/Pdnb+vJL+v3LL/dMQ9si+PP/ARFM87llAAAA
FA0E26C6F9CA49CA1B267E27E6747589	1	cxsmiles	JChemExcelcwAAAB+LCAAAAAAABADtvQdgHEmWJSYvbcp7f0r1StfgdKEIgGATJNiQQBDswYjN5pLsHWlHIymrKoHKZVZlXWYWQMztnbz33nvvvffee++997o7nU4n99//P1xmZAFs9s5K2smeIYCqyB8/fnwfPyK+9+3vT3enW/TjznTL/OR/d0/4J/+D/5/s7n355cm9rS9Ptr7cvbPV/db96f+6d6/zyfe+/f3/BwEZUqxzAAAA
943A23773483C1AE48B49F891B8BC8D0	1	cxsmiles	JChemExcelaAAAAB+LCAAAAAAABADtvQdgHEmWJSYvbcp7f0r1StfgdKEIgGATJNiQQBDswYjN5pLsHWlHIymrKoHKZVZlXWYWQMztnbz33nvvvffee++997o7nU4n99//P1xmZAFs9s5K2smeIYCqyB8/fnwfPyK+9+3vT3enW/TjjvlXf+7i35PdvS+/PLm39eXJ1pe7d7ZO+Cv+h791f/q/7t3rfPK9b3///wGC0yZeaAAAAA==
1EF34682247A4C554A3951E168900F45	1	cxsmiles	JChemExceleAAAAB+LCAAAAAAABADtvQdgHEmWJSYvbcp7f0r1StfgdKEIgGATJNiQQBDswYjN5pLsHWlHIymrKoHKZVZlXWYWQMztnbz33nvvvffee++997o7nU4n99//P1xmZAFs9s5K2smeIYCqyB8/fnwfPyK+9+3vn2zRP3f4n5PdvS+/PNn68svdO1vex/zVnrTwGvu/fvblnRe7Q1968A28/wdNN81/eAAAAA==
A19DD87D592C0C450DB873E60D87E95D	1	cxsmiles	JChemExcelgwAAAB+LCAAAAAAABADtvQdgHEmWJSYvbcp7f0r1StfgdKEIgGATJNiQQBDswYjN5pLsHWlHIymrKoHKZVZlXWYWQMztnbz33nvvvffee++997o7nU4n99//P1xmZAFs9s5K2smeIYCqyB8/fnwfPyK+9+3vn2zRP3f4n5PdvS+/PNn68svdO1vex/zVnrTwGvu/fvblnRe7Q19Gf901oP8fwf1un4MAAAA=
2C7446F63451E7BFBA82DC91984C48D5	1	cxsmiles	JChemExcelhgAAAB+LCAAAAAAABADtvQdgHEmWJSYvbcp7f0r1StfgdKEIgGATJNiQQBDswYjN5pLsHWlHIymrKoHKZVZlXWYWQMztnbz33nvvvffee++997o7nU4n99//P1xmZAFs9s5K2smeIYCqyB8/fnwfPyK+9+3vv9g62frsyzsnW/T7Hf7H/3VXfuxtffkl/f7ll3v+t53G3Xfdr9Pdqfzs/7v7vW9///8Bsf8MpoYAAAA=
A786CA0329F3511A637E5E951FB6B711	1	cxsmiles	JChemExcelcgAAAB+LCAAAAAAABADtvQdgHEmWJSYvbcp7f0r1StfgdKEIgGATJNiQQBDswYjN5pLsHWlHIymrKoHKZVZlXWYWQMztnbz33nvvvffee++997o7nU4n99//P1xmZAFs9s5K2smeIYCqyB8/fnwfPyK+9+3vT3enW/TjznTL/OR/d7884V/4H/zf+/Nk60v6tvN99+/e1z/+4s7Jj7/4fwAgUnP2cgAAAA==
58CF83B99B94B9AC2E90F88947E9F0B8	1	cxsmiles	JChemExcelcwAAAB+LCAAAAAAABADtvQdgHEmWJSYvbcp7f0r1StfgdKEIgGATJNiQQBDswYjN5pLsHWlHIymrKoHKZVZlXWYWQMztnbz33nvvvffee++997o7nU4n99//P1xmZAFs9s5K2smeIYCqyB8/fnwfPyK+9+3vn2zRP3c+kx/yr/765ZcnW94H/Evn797XP/6CPvvsyztfBpD8Rv8PpEyLbnMAAAA=
E04074314B9EC7F1308143FD16C1FFC5	1	cxsmiles	JChemExcelZwAAAB+LCAAAAAAABADtvQdgHEmWJSYvbcp7f0r1StfgdKEIgGATJNiQQBDswYjN5pLsHWlHIymrKoHKZVZlXWYWQMztnbz33nvvvffee++997o7nU4n99//P1xmZAFs9s5K2smeIYCqyB8/fnwfPyK+9+3vT3enW/TjznTL/OR/d0/KOye7e19+eXJv68uTrS9372yd8Df8D/7v/en/unev88n3vv39/wc8TMEMZwAAAA==
04A77E122F72E995B8C9B8765FD1AE40	1	cxsmiles	JChemExcelZwAAAB+LCAAAAAAABADtvQdgHEmWJSYvbcp7f0r1StfgdKEIgGATJNiQQBDswYjN5pLsHWlHIymrKoHKZVZlXWYWQMztnbz33nvvvffee++997o7nU4n99//P1xmZAFs9s5K2smeIYCqyB8/fnwfPyK+9+3vT3enW/TjznTL/OR/d5/Ud05297788uTe1pcnW1/u3tk64W/4H/zf+9P/de9e55Pvffv7/w/6DvGsZwAAAA==
CC7236893819F3BF23B90169B6393D59	1	cxsmiles	JChemExcelqgAAAB+LCAAAAAAABADtvQdgHEmWJSYvbcp7f0r1StfgdKEIgGATJNiQQBDswYjN5pLsHWlHIymrKoHKZVZlXWYWQMztnbz33nvvvffee++997o7nU4n99//P1xmZAFs9s5K2smeIYCqyB8/fnwfPyK+9+3vv9g62frsyzsnW/T7Hf7H/3VXfuxtffkl/f7ll3v+t53G8sKe//q9HkD5NfKJNPU61Y711/8HEW8ixaoAAAA=
5B7F8C667786CEF07390655D375D7371	1	cxsmiles	JChemExceldQAAAB+LCAAAAAAABADtvQdgHEmWJSYvbcp7f0r1StfgdKEIgGATJNiQQBDswYjN5pLsHWlHIymrKoHKZVZlXWYWQMztnbz33nvvvffee++997o7nU4n99//P1xmZAFs9s5K2smeIYCqyB8/fnwfPyK+9+3vn2zRP3f4n6/766782Nv68kv6/csv9/xvO42/9+3v/z84B4uEdQAAAA==
CBDDC7BC006742CC1FFBF7697E091F16	1	cxsmiles	JChemExcelZgAAAB+LCAAAAAAABADtvQdgHEmWJSYvbcp7f0r1StfgdKEIgGATJNiQQBDswYjN5pLsHWlHIymrKoHKZVZlXWYWQMztnbz33nvvvffee++997o7nU4n99//P1xmZAFs9s5K2smeIYCqyB8/fnwfPyK+9+3vT3enW/TjjvlXf+7i3xP+fUt+/fLLky3vA/6l83fv6x9/cefkx1/8Pw2kntxmAAAA
82EBF1ACF73F30961ADF61B65404FCFD	1	cxsmiles	JChemExcelZAAAAB+LCAAAAAAABADtvQdgHEmWJSYvbcp7f0r1StfgdKEIgGATJNiQQBDswYjN5pLsHWlHIymrKoHKZVZlXWYWQMztnbz33nvvvffee++997o7nU4n99//P1xmZAFs9s5K2smeIYCqyB8/fnwfPyK+9+3vT3enW/TjznTL/OR/d5/Ud0741y39gX/w/5Nd/vVkb+vLL+n3L7/cMw1ti+DP/webz/stZAAAAA==
0479BE84DE0A5ECF179760A59CC612F0	1	cxsmiles	JChemExceldgAAAB+LCAAAAAAABADtvQdgHEmWJSYvbcp7f0r1StfgdKEIgGATJNiQQBDswYjN5pLsHWlHIymrKoHKZVZlXWYWQMztnbz33nvvvffee++997o7nU4n99//P1xmZAFs9s5K2smeIYCqyB8/fnwfPyK+9+3vn2zRP3f4n5Otz768E/z95ZcnW94H/Evn797XP/5CAH0ZQPIb/T+o0JLAdgAAAA==
CFA2AC4C1BB5CBC322FEEAA79615992F	1	cxsmiles	JChemExceldAAAAB+LCAAAAAAABADtvQdgHEmWJSYvbcp7f0r1StfgdKEIgGATJNiQQBDswYjN5pLsHWlHIymrKoHKZVZlXWYWQMztnbz33nvvvffee++997o7nU4n99//P1xmZAFs9s5K2smeIYCqyB8/fnwfPyK+9+3vT3enW/TjznTL/OR/d7884V/4H/z/ZHfvyy9P7m3R51/u3tnqfuv+9H/du9f55Hvf/v7/A6n00ip0AAAA
25247EBFB5E1AD5E257444FC5B670398	1	cxsmiles	JChemExceldQAAAB+LCAAAAAAABADtvQdgHEmWJSYvbcp7f0r1StfgdKEIgGATJNiQQBDswYjN5pLsHWlHIymrKoHKZVZlXWYWQMztnbz33nvvvffee++997o7nU4n99//P1xmZAFs9s5K2smeIYCqyB8/fnwfPyK+9+3vv9g62frsyzsnW/T7Hf7H/3VXfuxtffkl/f7ll3v+t53G3p8bG/0/YRktW3UAAAA=
C0BB1F5984238FF85673745D8DB3E9B1	1	cxsmiles	JChemExcelewAAAB+LCAAAAAAABADtvQdgHEmWJSYvbcp7f0r1StfgdKEIgGATJNiQQBDswYjN5pLsHWlHIymrKoHKZVZlXWYWQMztnbz33nvvvffee++997o7nU4n99//P1xmZAFs9s5K2smeIYCqyB8/fnwfPyK+9+3vv9g62frsyzsnW/T7Hf7H/3VXfuxtffkl/f7ll3v+t53G3XcB9ss43O99+/v/D/1MSEB7AAAA
9AFCB236F26D443C36954B2A8DEFD78C	1	cxsmiles	JChemExcelewAAAB+LCAAAAAAABADtvQdgHEmWJSYvbcp7f0r1StfgdKEIgGATJNiQQBDswYjN5pLsHWlHIymrKoHKZVZlXWYWQMztnbz33nvvvffee++997o7nU4n99//P1xmZAFs9s5K2smeIYCqyB8/fnwfPyK+9+3vv9g62frsyzsnW/T7Hf7H/3VXfuxtffkl/f7ll3v+t53GnT+nu1P52f9393vf/v7/A8G2lC97AAAA
8A47903DD5EBCDF4763D57A80272C14A	1	cxsmiles	JChemExcelZQAAAB+LCAAAAAAABADtvQdgHEmWJSYvbcp7f0r1StfgdKEIgGATJNiQQBDswYjN5pLsHWlHIymrKoHKZVZlXWYWQMztnbz33nvvvffee++997o7nU4n99//P1xmZAFs9s5K2smeIYCqyB8/fnwfPyK+9+3vn/z4yckW/bzD/5zs7vl/eb/e2/ryZHfryy9P9ra+vOd/02nY//P/AW2U9FllAAAA
2608806BA9ACEFD135ACD8498715870D	1	cxsmiles	JChemExcelggAAAB+LCAAAAAAABADtvQdgHEmWJSYvbcp7f0r1StfgdKEIgGATJNiQQBDswYjN5pLsHWlHIymrKoHKZVZlXWYWQMztnbz33nvvvffee++997o7nU4n99//P1xmZAFs9s5K2smeIYCqyB8/fnwfPyK+9+3vT3enW/TjznTL/OR/d19sffblHfrfCf/N/5zs7vl/eb/e2/ryZHfryy9P9ra+vOd/02nY//P/Ab0UXmKCAAAA
379A87260B5DE3482ADA7136F4F7D942	1	cxsmiles	JChemExceliQAAAB+LCAAAAAAABADtvQdgHEmWJSYvbcp7f0r1StfgdKEIgGATJNiQQBDswYjN5pLsHWlHIymrKoHKZVZlXWYWQMztnbz33nvvvffee++997o7nU4n99//P1xmZAFs9s5K2smeIYCqyB8/fnwfPyK+9+3vT3enW/TjznTL/OR/d0/4J/+D/3t/nuzu+X95v97b+vJkd+vLL0/2tr6853/Tadj/8/8BRbfNbokAAAA=
AE877C39C5D1AA45C5E1FEADB8A5D845	1	cxsmiles	JChemExceliQAAAB+LCAAAAAAABADtvQdgHEmWJSYvbcp7f0r1StfgdKEIgGATJNiQQBDswYjN5pLsHWlHIymrKoHKZVZlXWYWQMztnbz33nvvvffee++997o7nU4n99//P1xmZAFs9s5K2smeIYCqyB8/fnwfPyK+9+3vn2zRP3f4H+/XL0+2PvvS/8D/dXdv4It7W1+e7G59+eXJ3taX9/xvOg37f/4/4pmf9IkAAAA=
DC29C3AD62B49E69DE37A42B5C942832	1	cxsmiles	JChemExcelbwAAAB+LCAAAAAAABADtvQdgHEmWJSYvbcp7f0r1StfgdKEIgGATJNiQQBDswYjN5pLsHWlHIymrKoHKZVZlXWYWQMztnbz33nvvvffee++997o7nU4n99//P1xmZAFs9s5K2smeIYCqyB8/fnwfPyK+9+3vn2zRP3c+kx/yr/y6u+f/5f16b+vLk92tL7882dv68p7/Tadh/8//B1E4cTBvAAAA
D4A62E523D82A95F97DE7CBD4B92DEBF	1	cxsmiles	JChemExcelgwAAAB+LCAAAAAAABADtvQdgHEmWJSYvbcp7f0r1StfgdKEIgGATJNiQQBDswYjN5pLsHWlHIymrKoHKZVZlXWYWQMztnbz33nvvvffee++997o7nU4n99//P1xmZAFs9s5K2smeIYCqyB8/fnwfPyK+9+3vn2zRP3f4n5t/3d0b+OLe1pcnu1tffnmyt/XlPf+bTsP+n/8PMsfKoYMAAAA=
4C0BAB37E264CBC9DE0F5E55190AEFB9	1	cxsmiles	JChemExcelfgAAAB+LCAAAAAAABADtvQdgHEmWJSYvbcp7f0r1StfgdKEIgGATJNiQQBDswYjN5pLsHWlHIymrKoHKZVZlXWYWQMztnbz33nvvvffee++997o7nU4n99//P1xmZAFs9s5K2smeIYCqyB8/fnwfPyK+9+3vT3enW/TjjvlXf+7i3xP+nf852d3z//J+vbf15cnu1pdfnuxtfXnP/6bTsP/n/wNlTHgIfgAAAA==
B8ED3966A0F8DCA0C3657B5E71F5F66D	1	cxsmiles	JChemExcelVwAAAB+LCAAAAAAABADtvQdgHEmWJSYvbcp7f0r1StfgdKEIgGATJNiQQBDswYjN5pLsHWlHIymrKoHKZVZlXWYWQMztnbz33nvvvffee++997o7nU4n99//P1xmZAFs9s5K2smeIYCqyB8/fnwfPyK+9+3vn2zRP3f4n5PdvS+/PLm39eXJ1pe7d7a8b/hbr6H36969ziff+/b3/x8H05rFVwAAAA==
1FAE84C9BF8DFFF2192D50047221CA94	1	cxsmiles	JChemExcelcQAAAB+LCAAAAAAABADtvQdgHEmWJSYvbcp7f0r1StfgdKEIgGATJNiQQBDswYjN5pLsHWlHIymrKoHKZVZlXWYWQMztnbz33nvvvffee++997o7nU4n99//P1xmZAFs9s5K2smeIYCqyB8/fnwfPyK+9+3vn2zRP3f4n5PdvS+/PLm39eXJ1pe7d7a8b/hbr6H36969AAL/+FJ/dtp+79vf/38AsDF233EAAAA=
21446C06BA9D96D59F76B24E66D6C703	1	cxsmiles	JChemExcelZQAAAB+LCAAAAAAABADtvQdgHEmWJSYvbcp7f0r1StfgdKEIgGATJNiQQBDswYjN5pLsHWlHIymrKoHKZVZlXWYWQMztnbz33nvvvffee++997o7nU4n99//P1xmZAFs9s5K2smeIYCqyB8/fnwfPyK+9+3vT3enW/TjznTL/OR/d0/KOyf8K/9zsvXllydb3gf8S+fv3tc//uLOyY+/+H8A0eiIxGUAAAA=
C3EB6A66EDC3E7F23C4D1EE3E3AEAE0F	1	cxsmiles	JChemExcelkgAAAB+LCAAAAAAABADtvQdgHEmWJSYvbcp7f0r1StfgdKEIgGATJNiQQBDswYjN5pLsHWlHIymrKoHKZVZlXWYWQMztnbz33nvvvffee++997o7nU4n99//P1xmZAFs9s5K2smeIYCqyB8/fnwfPyK+9+3vT3enW/TjjvlXf+7i3xP+fUt+/fLLky3vA/6l83f/68++vPNlAKXTnr4PP/t/ABQYscaSAAAA
6C295A2E49C8198F2A03EC5A3E2B744A	1	cxsmiles	JChemExcelngAAAB+LCAAAAAAABADtvQdgHEmWJSYvbcp7f0r1StfgdKEIgGATJNiQQBDswYjN5pLsHWlHIymrKoHKZVZlXWYWQMztnbz33nvvvffee++997o7nU4n99//P1xmZAFs9s5K2smeIYCqyB8/fnwfPyK+9+3vT3enW/TjjvlXf+7i3xP+fUt+/fLLky3vA/6l83f/68++vPNlAKXTfuP3/w8HcxzYngAAAA==
119CB11BCDC398880097A6D7D9BD5336	1	cxsmiles	JChemExcellwAAAB+LCAAAAAAABADtvQdgHEmWJSYvbcp7f0r1StfgdKEIgGATJNiQQBDswYjN5pLsHWlHIymrKoHKZVZlXWYWQMztnbz33nvvvffee++997o7nU4n99//P1xmZAFs9s5K2smeIYCqyB8/fnwfPyK+9+3vn2zRP3f4n5Otz76kf7788mTL+5R/6fzd/5re/DIANdT+xl+/9+3v/z8eUZoNlwAAAA==
04A2488EA287EA3C99FA13D1CD4866AE	1	cxsmiles	JChemExceleQAAAB+LCAAAAAAABADtvQdgHEmWJSYvbcp7f0r1StfgdKEIgGATJNiQQBDswYjN5pLsHWlHIymrKoHKZVZlXWYWQMztnbz33nvvvffee++997o7nU4n99//P1xmZAFs9s5K2smeIYCqyB8/fnwfPyK+9+3vn2zRP3f4n5PdvS+/PNn68svdO1vex/zVnrTwGvu/fvblnRe78S+/DDowAP8f37VutHkAAAA=
8F0DFDC05EE0B9DA408784133FDD933A	1	cxsmiles	JChemExcelTQAAAB+LCAAAAAAABADtvQdgHEmWJSYvbcp7f0r1StfgdKEIgGATJNiQQBDswYjN5pLsHWlHIymrKoHKZVZlXWYWQMztnbz33nvvvffee++997o7nU4n99//P1xmZAFs9s5K2smeIYCqyB8/fnwfPyK+9+3vn2zRP3f4n5PdvS+/PNn68svdO1vex/zVnrTwG/OPL/Xn9779/f8HgF4+xE0AAAA=
8E9320CE7029DF61CDDC3BBABEFF8C4E	1	cxsmiles	JChemExcelUgAAAB+LCAAAAAAABADtvQdgHEmWJSYvbcp7f0r1StfgdKEIgGATJNiQQBDswYjN5pLsHWlHIymrKoHKZVZlXWYWQMztnbz33nvvvffee++997o7nU4n99//P1xmZAFs9s5K2smeIYCqyB8/fnwfPyK+9+3vn2zRP3f4n5PdvS+/PNn68svdO1vex/zVnrTwGsuvT2r/wyf1/wNdJpLPUgAAAA==
8A8E85049500B4E796AC5CA403C6C8AF	1	cxsmiles	JChemExcelZQAAAB+LCAAAAAAABADtvQdgHEmWJSYvbcp7f0r1StfgdKEIgGATJNiQQBDswYjN5pLsHWlHIymrKoHKZVZlXWYWQMztnbz33nvvvffee++997o7nU4n99//P1xmZAFs9s5K2smeIYCqyB8/fnwfPyK+9+3vT3enW/TjznTL/OR/d0/4J/+D/3t/nuzKj72tL7+k37/8cs//ttP4e9/+/v8DIWLU42UAAAA=
78B399FD600EE3CD5FF784BEFB178D26	1	cxsmiles	JChemExcelWgAAAB+LCAAAAAAABADtvQdgHEmWJSYvbcp7f0r1StfgdKEIgGATJNiQQBDswYjN5pLsHWlHIymrKoHKZVZlXWYWQMztnbz33nvvvffee++997o7nU4n99//P1xmZAFs9s5K2smeIYCqyB8/fnwfPyK+9+3vT3enW/TjjvlXf+7i3xP+nf852ZUfe1tffkm/f/nlnv9tp/H3vv39/wcESzA+WgAAAA==
DF8DF648C9AD39A92860DFD3C146588C	1	cxsmiles	JChemExceliQAAAB+LCAAAAAAABADtvQdgHEmWJSYvbcp7f0r1StfgdKEIgGATJNiQQBDswYjN5pLsHWlHIymrKoHKZVZlXWYWQMztnbz33nvvvffee++997o7nU4n99//P1xmZAFs9s5K2smeIYCqyB8/fnwfPyK+9+3vn2zRP3f4n5PdvS+/PNn68svdO1vex/zVnmnht78nP7xP5NfIJ9JUYHShfu/b3/9/APX2ws6JAAAA
415DC3F97A27264F96920A4B32163BD3	1	cxsmiles	JChemExcelSQAAAB+LCAAAAAAABADtvQdgHEmWJSYvbcp7f0r1StfgdKEIgGATJNiQQBDswYjN5pLsHWlHIymrKoHKZVZlXWYWQMztnbz33nvvvffee++997o7nU4n99//P1xmZAFs9s5K2smeIYCqyB8/fnwfPyK+9+3vn2zRP3f4n5PdvS+/PNn68svdO1vex/zVnrTwGnu//viL/wfVn4c7SQAAAA==
13C71DC7BCCBCABD841080E180120818	1	cxsmiles	JChemExcelXwAAAB+LCAAAAAAABADtvQdgHEmWJSYvbcp7f0r1StfgdKEIgGATJNiQQBDswYjN5pLsHWlHIymrKoHKZVZlXWYWQMztnbz33nvvvffee++997o7nU4n99//P1xmZAFs9s5K2smeIYCqyB8/fnwfPyK+9+3vn2zRP3f4n5t/3ZUfe1tffkm/f/nlnv9tp/H3vv39/weYogBsXwAAAA==
2A2BEAA44D732289F462724C193B0941	1	cxsmiles	JChemExcelZQAAAB+LCAAAAAAABADtvQdgHEmWJSYvbcp7f0r1StfgdKEIgGATJNiQQBDswYjN5pLsHWlHIymrKoHKZVZlXWYWQMztnbz33nvvvffee++997o7nU4n99//P1xmZAFs9s5K2smeIYCqyB8/fnwfPyK+9+3vn2zRP3f4H+/XL0+2PvvS/8D/dVd+7G19+SX9/uWXe/63ncbf+/b3/x9EbG9JZQAAAA==
0043CB34F0B725A35299A0F0851FF056	1	cxsmiles	JChemExcelXgAAAB+LCAAAAAAABADtvQdgHEmWJSYvbcp7f0r1StfgdKEIgGATJNiQQBDswYjN5pLsHWlHIymrKoHKZVZlXWYWQMztnbz33nvvvffee++997o7nU4n99//P1xmZAFs9s5K2smeIYCqyB8/fnwfPyK+9+3vT3enW/TjznTL/OR/d19sffblHfrfCf/N/5zsyo+9rS+/pN+//HLP/5a/Cv78fwABmj67XgAAAA==
57820517679B2D336B7F634E4B09FA9E	1	cxsmiles	JChemExcelSwAAAB+LCAAAAAAABADtvQdgHEmWJSYvbcp7f0r1StfgdKEIgGATJNiQQBDswYjN5pLsHWlHIymrKoHKZVZlXWYWQMztnbz33nvvvffee++997o7nU4n99//P1xmZAFs9s5K2smeIYCqyB8/fnwfPyK+9+3vn2zRP3c+kx/yr/y6Kz/2tr78kn7/8ss9/9tO4+99+/v/D2OUhylLAAAA
58E7E6790285645A7BE5437DC5853B24	1	cxsmiles	JChemExcelfAAAAB+LCAAAAAAABADtvQdgHEmWJSYvbcp7f0r1StfgdKEIgGATJNiQQBDswYjN5pLsHWlHIymrKoHKZVZlXWYWQMztnbz33nvvvffee++997o7nU4n99//P1xmZAFs9s5K2smeIYCqyB8/fnwfPyK+9+3vT3enW/Tjjv67N92a7uK3F7sn/An/4/36Ysv7o/Pdya4ACUH6/+6e7JkX/x+W/RBmfAAAAA==
41CE9016918511241EBD9402679A4C3D	1	cxsmiles	JChemExcelXQAAAB+LCAAAAAAABADtvQdgHEmWJSYvbcp7f0r1StfgdKEIgGATJNiQQBDswYjN5pLsHWlHIymrKoHKZVZlXWYWQMztnbz33nvvvffee++997o7nU4n99//P1xmZAFs9s5K2smeIYCqyB8/fnwfPyK+9+3vv9g62frsyztfnmzRH3f4H/x/uruc7k35T/Ov/txb7uInvzXdDZs8M7+hyf8D9gPXZV0AAAA=
84FBECB9A98675FA352FC65C8F2C9652	1	cxsmiles	JChemExcelNAAAAB+LCAAAAAAABADtvQdgHEmWJSYvbcp7f0r1StfgdKEIgGATJNiQQBDswYjN5pLsHWlHIymrKoHKZVZlXWYWQMztnbz33nvvvffee++997o7nU4n99//P1xmZAFs9s5K2smeIYCqyB8/fnwfPyK+9+3vv9iif+6cbH325R359cVnJ/xzultNt6b6K3+BNp99+f8AtgGvgDQAAAA=
61BAD6A1EE3A23A58E3184A8832EB594	1	cxsmiles	JChemExcelegAAAB+LCAAAAAAABADtvQdgHEmWJSYvbcp7f0r1StfgdKEIgGATJNiQQBDswYjN5pLsHWlHIymrKoHKZVZlXWYWQMztnbz33nvvvffee++997o7nU4n99//P1xmZAFs9s5K2smeIYCqyB8/fnwfPyK+9+3vT3enW/Tjjv6792Jrei/4xP/33uvp3nQXv57wB1very+2vM86Tfp//j9IbWmKegAAAA==
0B24A88C950B40C9393B02E8924127EC	1	cxsmiles	JChemExcelXwAAAB+LCAAAAAAABADtvQdgHEmWJSYvbcp7f0r1StfgdKEIgGATJNiQQBDswYjN5pLsHWlHIymrKoHKZVZlXWYWQMztnbz33nvvvffee++997o7nU4n99//P1xmZAFs9s5K2smeIYCqyB8/fnwfPyK+9+3vf3myRf/e4X/0V/+jl1uffUmf4NcvvSb4Z7k7lZ/TvenW0vy+u3fnBf/6vW9///8BibnWcF8AAAA=
87CA507F787AFEBDEB25ABDFE2517A1B	1	cxsmiles	JChemExcelfAAAAB+LCAAAAAAABADtvQdgHEmWJSYvbcp7f0r1StfgdKEIgGATJNiQQBDswYjN5pLsHWlHIymrKoHKZVZlXWYWQMztnbz33nvvvffee++997o7nU4n99//P1xmZAFs9s5K2smeIYCqyB8/fnwfPyK+9+3vf3mydbJFP+/wP/xL5++TXf71ZI9/UPvPvrSf7W59yT/dGyf3tNm9e9zyS33vZPdeCPf/AVGFPTJ8AAAA
1E86F24B07758113063FD700EF9F7103	1	cxsmiles	JChemExcel5gAAAB+LCAAAAAAABADtvQdgHEmWJSYvbcp7f0r1StfgdKEIgGATJNiQQBDswYjN5pLsHWlHIymrKoHKZVZlXWYWQMztnbz33nvvvffee++997o7nU4n99//P1xmZAFs9s5K2smeIYCqyB8/fnwfPyK+9+3vf3my9dmXd0626Nc7/I/++qX3+80f45/l7nQL/zHAF/zRdG8qP/v/7vG/u/q+B6YDFf/fnu4OwtmNNnjmf/3/AN1YWBrmAAAA
3CEAB77C20878835AA07327CCF21F697	1	cxsmiles	JChemExcelogIAAB+LCAAAAAAABADtvQdgHEmWJSYvbcp7f0r1StfgdKEIgGATJNiQQBDswYjN5pLsHWlHIymrKoHKZVZlXWYWQMztnbz33nvvvffee++997o7nU4n99//P1xmZAFs9s5K2smeIYCqyB8/fnwfPyK+9+3vf3myRf/e2Qp/4B/83/vzZOv3xY/PTrbudr7hP3f51xcE4LMvzZfv85fA3PzJ+3wfw0YQDdsMD3jznzfS630bfWAf7/3nBwL/gNdv1Uj//H8A5IoOYqICAAA=
6DFD3777A0949B8C1275A6AC78B31140	1	cxsmiles	JChemExceliQAAAB+LCAAAAAAABADtvQdgHEmWJSYvbcp7f0r1StfgdKEIgGATJNiQQBDswYjN5pLsHWlHIymrKoHKZVZlXWYWQMztnbz33nvvvffee++997o7nU4n99//P1xmZAFs9s5K2smeIYCqyB8/fnwfPyK+9+3vn2zRP3f4n5Nd+bH12Zd3vjzZ4z++PLm39SX9sWe/dM17v3qf8Kd7vXb33JdB2/8H/pAZZIkAAAA=
2D43A3A823695560D49BBB53E938A92D	1	cxsmiles	JChemExcelxAAAAB+LCAAAAAAABADtvQdgHEmWJSYvbcp7f0r1StfgdKEIgGATJNiQQBDswYjN5pLsHWlHIymrKoHKZVZlXWYWQMztnbz33nvvvffee++997o7nU4n99//P1xmZAFs9s5K2smeIYCqyB8/fnwfPyK+9+3vT3enW/TjjvlXf+7i3xP+nf95seX90fnO+/XLk63PvrxzsvvZydYL+n/8HW7zZfe7Xe04REeRYnRe4D2AD978fwACFX4LxAAAAA==
54BE3ABD7407B5DE07347EDBA9BA1D0C	1	cxsmiles	JChemExcel+AAAAB+LCAAAAAAABADtvQdgHEmWJSYvbcp7f0r1StfgdKEIgGATJNiQQBDswYjN5pLsHWlHIymrKoHKZVZlXWYWQMztnbz33nvvvffee++997o7nU4n99//P1xmZAFs9s5K2smeIYCqyB8/fnwfPyK+9+3vv9g62frsyzsvdk+26K87/I/3K762f3S+O9ntfiqgfBjy4zP58Rpf4//T3Sl/EPl3t9uJ+/U93rqh6f8D9LRs1PgAAAA=
A7478D93189437EFC08847C34A527B12	1	cxsmiles	JChemExcelggAAAB+LCAAAAAAABADtvQdgHEmWJSYvbcp7f0r1StfgdKEIgGATJNiQQBDswYjN5pLsHWlHIymrKoHKZVZlXWYWQMztnbz33nvvvffee++997o7nU4n99//P1xmZAFs9s5K2smeIYCqyB8/fnwfPyK+9+3vn+xu0b93Tvjf3q97W19+eXJvy/voy72htvFf7/GP7qe75tP/BxgR+MGCAAAA
340ED8C89BF93C7DDF9D1E501C303B57	1	cxsmiles	JChemExcelpAAAAB+LCAAAAAAABADtvQdgHEmWJSYvbcp7f0r1StfgdKEIgGATJNiQQBDswYjN5pLsHWlHIymrKoHKZVZlXWYWQMztnbz33nvvvffee++997o7nU4n99//P1xmZAFs9s5K2smeIYCqyB8/fnwfPyK+9+3vf3my9dmXd0626Nc7/M/JrvzwPvF+3dv68suTe1tf7uHX7pf7A29q0+6X9/y3ul/umk//H6xgtSOkAAAA
F5537252D446AA19F3861C61FE7F85CA	1	cxsmiles	JChemExcelpAAAAB+LCAAAAAAABADtvQdgHEmWJSYvbcp7f0r1StfgdKEIgGATJNiQQBDswYjN5pLsHWlHIymrKoHKZVZlXWYWQMztnbz33nvvvffee++997o7nU4n99//P1xmZAFs9s5K2smeIYCqyB8/fnwfPyK+9+3vv9iif+6c8L/y627vE+/Xva0vvzy5t/XlHn7tfrk/8KY27X55z38rjsX3vv39/wd6Eq57pAAAAA==
F8B13F07BF0477DA1F717E37B7152460	1	cxsmiles	JChemExcel1gAAAB+LCAAAAAAABADtvQdgHEmWJSYvbcp7f0r1StfgdKEIgGATJNiQQBDswYjN5pLsHWlHIymrKoHKZVZlXWYWQMztnbz33nvvvffee++997o7nU4n99//P1xmZAFs9s5K2smeIYCqyB8/fnwfPyK+9+3vf3myRf/e2dIf+Mf7tfPnwK+7m77c2/ryy5N7W1/u4dful/sDb2rT7pf3/LfiWHzv29//fwB+QO8r1gAAAA==
1D31A4A992884F6F6DBA7509BF894EDF	1	cxsmiles	JChemExceldQAAAB+LCAAAAAAABADtvQdgHEmWJSYvbcp7f0r1StfgdKEIgGATJNiQQBDswYjN5pLsHWlHIymrKoHKZVZlXWYWQMztnbz33nvvvffee++997o7nU4n99//P1xmZAFs9s5K2smeIYCqyB8/fnwfPyK+9+3vf/l667Mv72x99vrOlydb9PedrenulH+J/LuLf7UZ/nmx1fngxl+/9+3v/z8E8Y94dQAAAA==
5CA5D9F927D0F01C2A568DDE29A6B168	1	cxsmiles	JChemExcelYwAAAB+LCAAAAAAABADtvQdgHEmWJSYvbcp7f0r1StfgdKEIgGATJNiQQBDswYjN5pLsHWlHIymrKoHKZVZlXWYWQMztnbz33nvvvffee++997o7nU4n99//P1xmZAFs9s5K2smeIYCqyB8/fnwfPyK+9+3vT3enW/Tjjvl3uvXsznQXv5/sfvbihD/lf062Pvvyzout6V63Pf/c3aPvqAH9z3vne9/+/v8DyVywtWMAAAA=
3709E9C43784FBA551FCB4AF9962A13A	1	cxsmiles	JChemExcelYAAAAB+LCAAAAAAABADtvQdgHEmWJSYvbcp7f0r1StfgdKEIgGATJNiQQBDswYjN5pLsHWlHIymrKoHKZVZlXWYWQMztnbz33nvvvffee++997o7nU4n99//P1xmZAFs9s5K2smeIYCqyB8/fnwfPyK+9+3vT3enW/TjjvlXf+7i35Pdz16c8N/8z8nWZ1/eebE13QvfOCnNr7t7d7zm3/v29/8f4cRYuWAAAAA=
4A1DD8D595FB44F0E8EFE8B418208139	1	cxsmiles	JChemExcelVwAAAB+LCAAAAAAABADtvQdgHEmWJSYvbcp7f0r1StfgdKEIgGATJNiQQBDswYjN5pLsHWlHIymrKoHKZVZlXWYWQMztnbz33nvvvffee++997o7nU4n99//P1xmZAFs9s5K2smeIYCqyB8/fnwfPyK+9+3vv9id7k236Jc75l/9uXey9dmLE/6d/znZ/ezLO9PdsK337+5JeefFFrX57Mv/BzYMiBVXAAAA
072130B423C04CF26015FFCBC7841DFB	1	cxsmiles	JChemExceliAAAAB+LCAAAAAAABADtvQdgHEmWJSYvbcp7f0r1StfgdKEIgGATJNiQQBDswYjN5pLsHWlHIymrKoHKZVZlXWYWQMztnbz33nvvvffee++997o7nU4n99//P1xmZAFs9s5K2smeIYCqyB8/fnwfPyK+9+3vT3enW/TjznTr5Mdf3NHf96a7J1tfnuzxX/j/lmsm/z4zv+3i3xP+fWv41xdb3h+d77737e//P5Y7XUaIAAAA
EDBEF2384EB05D753E2FEE0FB39170F1	1	cxsmiles	JChemExceljgAAAB+LCAAAAAAABADtvQdgHEmWJSYvbcp7f0r1StfgdKEIgGATJNiQQBDswYjN5pLsHWlHIymrKoHKZVZlXWYWQMztnbz33nvvvffee++997o7nU4n99//P1xmZAFs9s5K2smeIYCqyB8/fnwfPyK+9+3vT3enW/Tjjv67N92a7uK3F1vum5PSfC3/7p7wT/7nZI9/8K/ep9FfX2x5f3S++963v///AAr7tj+OAAAA
AF4DDCCC8734A51EEA93AFE85EB50383	1	cxsmiles	JChemExcelmwAAAB+LCAAAAAAABADtvQdgHEmWJSYvbcp7f0r1StfgdKEIgGATJNiQQBDswYjN5pLsHWlHIymrKoHKZVZlXWYWQMztnbz33nvvvffee++997o7nU4n99//P1xmZAFs9s5K2smeIYCqyB8/fnwfPyK+9+3vn2zRP3f4ny9PdvXnnv68t/Ul/bGnbbym/V+9T/jTvV67e+7L3e6X/T//HylHUA+bAAAA
CA084F4191CFB2CE003C7457A6B4F39A	1	cxsmiles	JChemExcelegAAAB+LCAAAAAAABADtvQdgHEmWJSYvbcp7f0r1StfgdKEIgGATJNiQQBDswYjN5pLsHWlHIymrKoHKZVZlXWYWQMztnbz33nvvvffee++997o7nU4n99//P1xmZAFs9s5K2smeIYCqyB8/fnwfPyK+9+3vf3myRf/e2ZruTvmX6dZyujfdMn94/+7u3TnZenaH/vfM+2WXv3zB/yqoDb9K6+99+/v/D/NAY1d6AAAA
B56F9710CCF113E59C6BAFA0092B68A1	1	cxsmiles	JChemExcelhwAAAB+LCAAAAAAABADtvQdgHEmWJSYvbcp7f0r1StfgdKEIgGATJNiQQBDswYjN5pLsHWlHIymrKoHKZVZlXWYWQMztnbz33nvvvffee++997o7nU4n99//P1xmZAFs9s5K2smeIYCqyB8/fnwfPyK+9+3vfzndnW7Rzzvm3xP++Zn8ONn67Ms78mv3b20x3Qtf/1J/eC9JM6/Rbufb/wc1DRzOhwAAAA==
CE2A267A0D8489A955D7204F4A7E276C	1	cxsmiles	JChemExcelewAAAB+LCAAAAAAABADtvQdgHEmWJSYvbcp7f0r1StfgdKEIgGATJNiQQBDswYjN5pLsHWlHIymrKoHKZVZlXWYWQMztnbz33nvvvffee++997o7nU4n99//P1xmZAFs9s5K2smeIYCqyB8/fnwfPyK+9+3vf/lii/69c7L12Zf0D37Vv7/mrwRGIE53p/Kz/+/u9779/f8HHDEGGXsAAAA=
75C622C9E08A173D92EBF41C17E9426A	1	cxsmiles	JChemExcelKQEAAB+LCAAAAAAABADtvQdgHEmWJSYvbcp7f0r1StfgdKEIgGATJNiQQBDswYjN5pLsHWlHIymrKoHKZVZlXWYWQMztnbz33nvvvffee++997o7nU4n99//P1xmZAFs9s5K2smeIYCqyB8/fnwfPyK+9+3vn+x+drJ3sjW9N92iv+5Mt7482frsyzsn/Bf/s/Hj6b2TXftn59utzt/en/6vu71293ptuk38v6OYDfR175Y47e2G7f4fECDD1CkBAAA=
320B9460ADA1E7E59B6685D827EEE068	1	cxsmiles	JChemExcelPAEAAB+LCAAAAAAABADtvQdgHEmWJSYvbcp7f0r1StfgdKEIgGATJNiQQBDswYjN5pLsHWlHIymrKoHKZVZlXWYWQMztnbz33nvvvffee++997o7nU4n99//P1xmZAFs9s5K2smeIYCqyB8/fnwfPyK+9+3vv/jsZOvFFv1y52Trsxf4af7Cv/6v/U/wT7zt8K+benjfX+N4/5BG8f8A+E5qwzwBAAA=
3D7A0E4213F16372522442F80F02BDF8	1	cxsmiles	JChemExceljQAAAB+LCAAAAAAABADtvQdgHEmWJSYvbcp7f0r1StfgdKEIgGATJNiQQBDswYjN5pLsHWlHIymrKoHKZVZlXWYWQMztnbz33nvvvffee++997o7nU4n99//P1xmZAFs9s5K2smeIYCqyB8/fnwfPyK+9+3vn2x9drI73Ztu0e93Iv/unfBP/sf7dcMbu3t+Q+/XF1veH53vvvft7/8/6NGsyI0AAAA=
2687A5626C470DDC068013473E676D83	1	cxsmiles	JChemExcel0QEAAB+LCAAAAAAABADtvQdgHEmWJSYvbcp7f0r1StfgdKEIgGATJNiQQBDswYjN5pLsHWlHIymrKoHKZVZlXWYWQMztnbz33nvvvffee++997o7nU4n99//P1xmZAFs9s5K2smeIYCqyB8/fnwfPyK+9+3vf3my9dmXd052t+j3Oyf879aX3u/865589GXYzH9Dv/lS//ZaDMB94b7UV/HP7yvffnaydVf//H2/ob/55139/DPp5u6tsR1oIbTrU8P7/eaPB1psBLLXRUX//H8AYcH8xtEBAAA=
E694A2009F7D08D5AD4837485B902596	1	cxsmiles	JChemExceldQAAAB+LCAAAAAAABADtvQdgHEmWJSYvbcp7f0r1StfgdKEIgGATJNiQQBDswYjN5pLsHWlHIymrKoHKZVZlXWYWQMztnbz33nvvvffee++997o7nU4n99//P1xmZAFs9s5K2smeIYCqyB8/fnwfPyK+9+3vf3myu0U/7pzwv/zPC/8D7/Pp3lR+6r9fet95n+/x2wKVmnz2pQ/7e9/+/v8DzNvuTXUAAAA=
88673F3D5E275A5138783270BA586F4D	1	cxsmiles	JChemExcelmAAAAB+LCAAAAAAABADtvQdgHEmWJSYvbcp7f0r1StfgdKEIgGATJNiQQBDswYjN5pLsHWlHIymrKoHKZVZlXWYWQMztnbz33nvvvffee++997o7nU4n99//P1xmZAFs9s5K2smeIYCqyB8/fnwfPyK+9+3vT3enW/TjjvlXf+7i3xP+fevLk90t70/+dY9/vNjyPvOa9Fvyr7v2126v3r/o+f8BA2gwh5gAAAA=
8843FD54807F721C729A065639D2D1F4	1	cxsmiles	JChemExcelPQAAAB+LCAAAAAAABADtvQdgHEmWJSYvbcp7f0r1StfgdKEIgGATJNiQQBDswYjN5pLsHWlHIymrKoHKZVZlXWYWQMztnbz33nvvvffee++997o7nU4n99//P1xmZAFs9s5K2smeIYCqyB8/fnwfPyK+9+3vfzndnW6dlHemW/THHf/X3df4qvsp/7r75fe+/f3/Bxj8cTc9AAAA
E3D4907FD9DFDAFC140331C60237D14E	1	cxsmiles	JChemExcel7QAAAB+LCAAAAAAABADtvQdgHEmWJSYvbcp7f0r1StfgdKEIgGATJNiQQBDswYjN5pLsHWlHIymrKoHKZVZlXWYWQMztnbz33nvvvffee++997o7nU4n99//P1xmZAFs9s5K2smeIYCqyB8/fnwfPyK+9+3vf3my9dmXd052t0626K87/A/+7/3p/7p3y3b3tk72PzvxPv7s5D71dOK996V8LD9do/3b99Bptydf7Mbe/N63v///AGVP+qDtAAAA
45B3160ACDA6776442AA6BCB0B5BADC3	1	cxsmiles	JChemExceleQAAAB+LCAAAAAAABADtvQdgHEmWJSYvbcp7f0r1StfgdKEIgGATJNiQQBDswYjN5pLsHWlHIymrKoHKZVZlXWYWQMztnbz33nvvvffee++997o7nU4n99//P1xmZAFs9s5K2smeIYCqyB8/fnwfPyK+9+3vT3enW/Tjjv6792Jres98clKaj+Xfe6+ne9Nd/HrCH2wN//piy/uj8933vv39/wc9wuMJeQAAAA==
76C02120AC173814491969F1D364D3BD	1	cxsmiles	JChemExceldwAAAB+LCAAAAAAABADtvQdgHEmWJSYvbcp7f0r1StfgdKEIgGATJNiQQBDswYjN5pLsHWlHIymrKoHKZVZlXWYWQMztnbz33nvvvffee++997o7nU4n99//P1xmZAFs9s5K2smeIYCqyB8/fnwfPyK+9+3vn2x9drI73Ztu0e93Iv/uve5+eVKaX3f37pzwb/yP9+uLLe+Pznff+/b3/x9l6ZDldwAAAA==
B5508C604D5E79031F0CD76C796D60DD	1	cxsmiles	JChemExceloAAAAB+LCAAAAAAABADtvQdgHEmWJSYvbcp7f0r1StfgdKEIgGATJNiQQBDswYjN5pLsHWlHIymrKoHKZVZlXWYWQMztnbz33nvvvffee++997o7nU4n99//P1xmZAFs9s5K2smeIYCqyB8/fnwfPyK+9+3vfzndnW7RzzvmX/25e8I/9Y+wyUlpft2lX0+2vKb8S+dv78/3afu9b3///wFlmHQAoAAAAA==
60AC6C01A0CE36024F169498AAD5EA72	1	cxsmiles	JChemExcelrwAAAB+LCAAAAAAABADtvQdgHEmWJSYvbcp7f0r1StfgdKEIgGATJNiQQBDswYjN5pLsHWlHIymrKoHKZVZlXWYWQMztnbz33nvvvffee++997o7nU4n99//P1xmZAFs9s5K2smeIYCqyB8/fnwfPyK+9+3vT3enW/TjjvlXf+7i35Otk/LOZydb3Tbev7vyb/jNlyf8C//j/fpiK/5558/ON15H/w/F/mGSrwAAAA==
A39BCBBD74C3E55850FCF9E6C313B812	1	cxsmiles	JChemExcelhAAAAB+LCAAAAAAABADtvQdgHEmWJSYvbcp7f0r1StfgdKEIgGATJNiQQBDswYjN5pLsHWlHIymrKoHKZVZlXWYWQMztnbz33nvvvffee++997o7nU4n99//P1xmZAFs9s5K2smeIYCqyB8/fnwfPyK+9+3vn2x9drI73Ztu0e93Iv/unfDPz070z8GGu3t3pA3/4/36Ysv7o/Pd9779/f8HXyMq9oQAAAA=
563AAB6FC626909296A1E19FE7204836	1	cxsmiles	JChemExcel7wAAAB+LCAAAAAAABADtvQdgHEmWJSYvbcp7f0r1StfgdKEIgGATJNiQQBDswYjN5pLsHWlHIymrKoHKZVZlXWYWQMztnbz33nvvvffee++997o7nU4n99//P1xmZAFs9s5K2smeIYCqyB8/fnwfPyK+9+3vf3myu3WyRb/c+Ux+yL9bX55sffal+QP/8Hd79/jjF35Lr810fyo/+//uy/sDL+qXX5oG97x2IV7++7sRDDf9+f8AIf6u8u8AAAA=
4B6667CD75F664D7ABBCFE3834CB1878	1	cxsmiles	JChemExceljwAAAB+LCAAAAAAABADtvQdgHEmWJSYvbcp7f0r1StfgdKEIgGATJNiQQBDswYjN5pLsHWlHIymrKoHKZVZlXWYWQMztnbz33nvvvffee++997o7nU4n99//P1xmZAFs9s5K2smeIYCqyB8/fnwfPyK+9+3vf3my9dmXd6a7060v6a870y36RT7a49/wIf/jfdv5jP/d63wcb7W7sdX/Axda1fyPAAAA
460A0BFCB2DFACDC45CB8CAF97660DA5	1	cxsmiles	JChemExcelNwIAAB+LCAAAAAAABADtvQdgHEmWJSYvbcp7f0r1StfgdKEIgGATJNiQQBDswYjN5pLsHWlHIymrKoHKZVZlXWYWQMztnbz33nvvvffee++997o7nU4n99//P1xmZAFs9s5K2smeIYCqyB8/fnwfPyK+9+3vf3myRf/e4X9OdvmH+ejLkz35WP/0fz+5F3x1sh/+aX7e9z/mXz/tfeL9+kB+HPS7faiY/e67Oxa818j7pAsTb3Q+77YW4NTtBjB9LD/d1FwGHpCMf9/vfW7/NsPqfh68L2Q35I9QYvCVjV3seb8PwVHm+N63v///AFYYQL43AgAA
BF8B2BD534A76AA91B3ECF8926FEC374	1	cxsmiles	JChemExcelEwEAAB+LCAAAAAAABADtvQdgHEmWJSYvbcp7f0r1StfgdKEIgGATJNiQQBDswYjN5pLsHWlHIymrKoHKZVZlXWYWQMztnbz33nvvvffee++997o7nU4n99//P1xmZAFs9s5K2smeIYCqyB8/fnwfPyK+9+3vf3my9dmXd052t0626K87/A/+7/3p/7p3y3b3tk72Pzvpfjy9P92abmmXIZzBj+W9k/3bd9xptydf7Mbe7P/5/wATWfYsEwEAAA==
F229BD3BDF27490705A5FE529AFC5C2A	1	cxsmiles	JChemExcelKQEAAB+LCAAAAAAABADtvQdgHEmWJSYvbcp7f0r1StfgdKEIgGATJNiQQBDswYjN5pLsHWlHIymrKoHKZVZlXWYWQMztnbz33nvvvffee++997o7nU4n99//P1xmZAFs9s5K2smeIYCqyB8/fnwfPyK+9+3vf3my9dmXd+ifky366478K7/u7tGX3gf8S+fvk3u917a8dp+d7DP86f3p1pf4YPqp+UIbfzn9dLo1vf/lye69/T6Yz3oI3IRPD5H3AHayx79+2f/q/wEi0kBLKQEAAA==
3847509E7FDD9CBB64E7E8CADB091670	1	cxsmiles	JChemExcelngAAAB+LCAAAAAAABADtvQdgHEmWJSYvbcp7f0r1StfgdKEIgGATJNiQQBDswYjN5pLsHWlHIymrKoHKZVZlXWYWQMztnbz33nvvvffee++997o7nU4n99//P1xmZAFs9s5K2smeIYCqyB8/fnwfPyK+9+3vT3enW/TjznTvZOuzL++c3JO/9vXTrS9P+Bf+Z+gTecP/XMF8Od2j/3bNNyd79iXzSQgq/PP/AdX07VueAAAA
45465B66AB71D4DBF3D89849666CECF8	1	cxsmiles	JChemExcelnwAAAB+LCAAAAAAABADtvQdgHEmWJSYvbcp7f0r1StfgdKEIgGATJNiQQBDswYjN5pLsHWlHIymrKoHKZVZlXWYWQMztnbz33nvvvffee++997o7nU4n99//P1xmZAFs9s5K2smeIYCqyB8/fnwfPyK+9+3vT3enW/TjznTL/OR/d7884V/4nxt/lT8/+3Lg6xe7N0Lwf901MP8fn9apip8AAAA=
6077712646668568964F334DB7D4F3D8	1	cxsmiles	JChemExcel4QAAAB+LCAAAAAAABADtvQdgHEmWJSYvbcp7f0r1StfgdKEIgGATJNiQQBDswYjN5pLsHWlHIymrKoHKZVZlXWYWQMztnbz33nvvvffee++997o7nU4n99//P1xmZAFs9s5K2smeIYCqyB8/fnwfPyK+9+3vT3er6Rb9vDPdmu7i58ku//nlydZnX9452dM/9vbo8xP+g//hlu5P/1d5/+Rer/m+wtrXVwC/26j30r0efPlV8eu03tsNP/l/AMCuw2LhAAAA
E2DD454F0B4B054D5E2641BE3F48F9AA	1	cxsmiles	JChemExcellQAAAB+LCAAAAAAABADtvQdgHEmWJSYvbcp7f0r1StfgdKEIgGATJNiQQBDswYjN5pLsHWlHIymrKoHKZVZlXWYWQMztnbz33nvvvffee++997o7nU4n99//P1xmZAFs9s5K2smeIYCqyB8/fnwfPyK+9+3vf3myRf/e4X/01xf6x2df3jnZ9b747GRvem/Kvwb/7i+Dz6b39g0kfnePf7zY8j7jz3fdr8E3/w9RhWfWlQAAAA==
9A6DA6D4DA46EE97055E396D2A66E910	1	cxsmiles	JChemExcelkwAAAB+LCAAAAAAABADtvQdgHEmWJSYvbcp7f0r1StfgdKEIgGATJNiQQBDswYjN5pLsHWlHIymrKoHKZVZlXWYWQMztnbz33nvvvffee++997o7nU4n99//P1xmZAFs9s5K2smeIYCqyB8/fnwfPyK+9+3vfzndnW7Rzzv67950a7qL3074763ur7vy417vC//XL/n3kx8/0bbelxte20O//w9tcOnzkwAAAA==
5523B9DE715760F0EF5BD122DAC7D97C	1	cxsmiles	JChemExcelIgEAAB+LCAAAAAAABADtvQdgHEmWJSYvbcp7f0r1StfgdKEIgGATJNiQQBDswYjN5pLsHWlHIymrKoHKZVZlXWYWQMztnbz33nvvvffee++997o7nU4n99//P1xmZAFs9s5K2smeIYCqyB8/fnwfPyK+9+3vf3my9dmXd+ifky366478K7/u7tGX3gf8S+fvk3u917a8dp+d7DP86f3p1pf4YPqp+UIbfzn9dLo1vf/lye69/T6Yz3oI3IRPD5H3AHayx6TwP/t/ADhVLPsiAQAA
C622ED6FB904CF910933D8F319E06379	1	cxsmiles	JChemExceliAMAAB+LCAAAAAAABADtvQdgHEmWJSYvbcp7f0r1StfgdKEIgGATJNiQQBDswYjN5pLsHWlHIymrKoHKZVZlXWYWQMztnbz33nvvvffee++997o7nU4n99//P1xmZAFs9s5K2smeIYCqyB8/fnwfPyK+9+3vf3myRf/e4X+8X1/oB599aT79+fPJ5vHjX/ep94r7+hZ/fsDrP+RG+Ge6O+WfS/lrT/6K/Lu79yGD/Hnbzf8DvJrzj4gDAAA=
5898D54ED259E441788212A887876E61	1	cxsmiles	JChemExcellgAAAB+LCAAAAAAABADtvQdgHEmWJSYvbcp7f0r1StfgdKEIgGATJNiQQBDswYjN5pLsHWlHIymrKoHKZVZlXWYWQMztnbz33nvvvffee++997o7nU4n99//P1xmZAFs9s5K2smeIYCqyB8/fnwfPyK+9+3vT3enW9V0b7pFv9/Rf++dbH325Z2TffnrvvnuyxP+hf8Z+kTe8D9XMF9O70139+7oF533wj//Hw9rv5eWAAAA
7D342E6B7F9401EF714CAF3205AC79CE	1	cxsmiles	JChemExcelQAEAAB+LCAAAAAAABADtvQdgHEmWJSYvbcp7f0r1StfgdKEIgGATJNiQQBDswYjN5pLsHWlHIymrKoHKZVZlXWYWQMztnbz33nvvvffee++997o7nU4n99//P1xmZAFs9s5K2smeIYCqyB8/fnwfPyK+9+3vf3my9dmXd6a7060v6a87063plvzkf3dP+Cf/0//V+8T79MugBQHvt+6+uMu/EirDbYKvdmMtHJQ4cl92P46j74Ha3Oh73/7+/wOOliqIQAEAAA==
80EE84D8814E9AD882EC6DBCC164D006	1	cxsmiles	JChemExcelPAAAAB+LCAAAAAAABADtvQdgHEmWJSYvbcp7f0r1StfgdKEIgGATJNiQQBDswYjN5pLsHWlHIymrKoHKZVZlXWYWQMztnbz33nvvvffee++997o7nU4n99//P1xmZAFs9s5K2smeIYCqyB8/fnwfPyK+9+3vv9g62frsyztfvvjsZOv1yRZ9cof/wf83/vn/AJUZnBM8AAAA
7B3A46ECA27F6462E30E95B9E9FEF302	1	cxsmiles	JChemExcelbQAAAB+LCAAAAAAABADtvQdgHEmWJSYvbcp7f0r1StfgdKEIgGATJNiQQBDswYjN5pLsHWlHIymrKoHKZVZlXWYWQMztnbz33nvvvffee++997o7nU4n99//P1xmZAFs9s5K2smeIYCqyB8/fnwfPyK+9+3vT3eX0y36eWe5Nd3FzxP+a8v79Uvvo+mutDb/npTm1138uunb/wdwB6dcbQAAAA==
F5C130CC78418CFC72B3C7880443B9AC	1	cxsmiles	JChemExcelbgEAAB+LCAAAAAAABADtvQdgHEmWJSYvbcp7f0r1StfgdKEIgGATJNiQQBDswYjN5pLsHWlHIymrKoHKZVZlXWYWQMztnbz33nvvvffee++997o7nU4n99//P1xmZAFs9s5K2smeIYCqyB8/fnwfPyK+9+3vf3my9dmXd0626Nc7W/oD/+D/+ueX8Y+7n+7yr1+e7OGFzpf+39TAvrOn7wTfv+erA4266Nn2X3Zf+NJrHh/qBrA9vAXabqTx/wOkTEFUbgEAAA==
7F325CFB666FAB642C85A9037C509BFD	1	cxsmiles	JChemExcelkgEAAB+LCAAAAAAABADtvQdgHEmWJSYvbcp7f0r1StfgdKEIgGATJNiQQBDswYjN5pLsHWlHIymrKoHKZVZlXWYWQMztnbz33nvvvffee++997o7nU4n99//P1xmZAFs9s5K2smeIYCqyB8/fnwfPyK+9+3vf3my9dmXd0626Nc7W/oD/+D/J7v865f9b0/29Jt7W/Rt57Wg4T350QF8T1+/xath+/eF/2X3hS+95t23bgS76TWDnP14r9ui++tu95Pvffv7/w/JI76lkgEAAA==
9B974C11467B784DCC70F5398F4FDAEF	1	cxsmiles	JChemExcelWgAAAB+LCAAAAAAABADtvQdgHEmWJSYvbcp7f0r1StfgdKEIgGATJNiQQBDswYjN5pLsHWlHIymrKoHKZVZlXWYWQMztnbz33nvvvffee++997o7nU4n99//P1xmZAFs9s5K2smeIYCqyB8/fnwfPyK+9+3vf3myRf/e4X/01y8/4Hf8g7//H7KyARRaAAAA
2D1F4A50A57C0A2F71763C934AA995E7	1	cxsmiles	JChemExceljgAAAB+LCAAAAAAABADtvQdgHEmWJSYvbcp7f0r1StfgdKEIgGATJNiQQBDswYjN5pLsHWlHIymrKoHKZVZlXWYWQMztnbz33nvvvffee++997o7nU4n99//P1xmZAFs9s5K2smeIYCqyB8/fnwfPyK+9+3vv9iif+5Md5fTreV0byp/bX15wr/wP0OfyHt7d17sel95v77YOtn67Ms7073KQOV/9zrNTnYNzP8Hv5YxZY4AAAA=
D3285636465D49C627F559398818CADE	1	cxsmiles	JChemExcelegAAAB+LCAAAAAAABADtvQdgHEmWJSYvbcp7f0r1StfgdKEIgGATJNiQQBDswYjN5pLsHWlHIymrKoHKZVZlXWYWQMztnbz33nvvvffee++997o7nU4n99//P1xmZAFs9s5K2smeIYCqyB8/fnwfPyK+9+3vT3enW/Tjjv6792Jrei/4xP/33uvp3nQXv57wB1vDv77Y8v7ofPe9b3///wF6mg0WegAAAA==
FE28FB5AC8175052A05CB23BB5136EAF	1	cxsmiles	JChemExcel6gAAAB+LCAAAAAAABADtvQdgHEmWJSYvbcp7f0r1StfgdKEIgGATJNiQQBDswYjN5pLsHWlHIymrKoHKZVZlXWYWQMztnbz33nvvvffee++997o7nU4n99//P1xmZAFs9s5K2smeIYCqyB8/fnwfPyK+9+3vfzndnW7Rzzvm3y/5x97J1mdf3pneM3/vT7e0wT35Znfvzgl/sMV/f6l/4B/8/0Te2/I+7rVw3+zzjy9PdvWnARx74Uvv9xcDbeyfu+bX/wfXnuT96gAAAA==
1A66E78002E36AB6513F28403B81F467	1	cxsmiles	JChemExcelsgAAAB+LCAAAAAAABADtvQdgHEmWJSYvbcp7f0r1StfgdKEIgGATJNiQQBDswYjN5pLsHWlHIymrKoHKZVZlXWYWQMztnbz33nvvvffee++997o7nU4n99//P1xmZAFs9s5K2smeIYCqyB8/fnwfPyK+9+3vn2x9drJFP+9Md6fyU/7dM3+Fn35v+cn3d+UF/gf/f7HV+aDzp4O83Jp2X97u9Ov/u9sH9v8Arc++47IAAAA=
E52C8FCA0E3848D55BE224FE2DD31718	1	cxsmiles	JChemExceltQAAAB+LCAAAAAAABADtvQdgHEmWJSYvbcp7f0r1StfgdKEIgGATJNiQQBDswYjN5pLsHWlHIymrKoHKZVZlXWYWQMztnbz33nvvvffee++997o7nU4n99//P1xmZAFs9s5K2smeIYCqyB8/fnwfPyK+9+3vfzndnW6dbH325Z2TLfrzzpb+wD/4v/dn55vp1pf8Y2+6VU3vTbfM3x8I7V7vm93wg/8H5sY0KLUAAAA=
59E6404B4076D00385B764C37DA231E3	1	cxsmiles	JChemExcelywAAAB+LCAAAAAAABADtvQdgHEmWJSYvbcp7f0r1StfgdKEIgGATJNiQQBDswYjN5pLsHWlHIymrKoHKZVZlXWYWQMztnbz33nvvvffee++997o7nU4n99//P1xmZAFs9s5K2smeIYCqyB8/fnwfPyK+9+3vf3myRf/e4X9OdvmH+ejLkz35WP/0fn/BP7wP4t/J+waOgeu90oPjdyK/721qqAh/79vf/38AamA3NssAAAA=
76DCE753E591E2C0DC4D824F5345F297	1	cxsmiles	JChemExceloAEAAB+LCAAAAAAABADtvQdgHEmWJSYvbcp7f0r1StfgdKEIgGATJNiQQBDswYjN5pLsHWlHIymrKoHKZVZlXWYWQMztnbz33nvvvffee++997o7nU4n99//P1xmZAFs9s5K2smeIYCqyB8/fnwfPyK+9+3vf3my9dmXd0626Nc7W/oD/3i/8p+7/OuXYcNuI/nzS+/3W0LfU+j3tr482af/dyEH7+679/b1vQF0vux+HEe4C7U3jM9O7nlfbAAi4xhucDsou+bT/wcF2M8goAEAAA==
4497E30BF30E6FE19781D02FACA9A68C	1	cxsmiles	JChemExcelbgAAAB+LCAAAAAAABADtvQdgHEmWJSYvbcp7f0r1StfgdKEIgGATJNiQQBDswYjN5pLsHWlHIymrKoHKZVZlXWYWQMztnbz33nvvvffee++997o7nU4n99//P1xmZAFs9s5K2smeIYCqyB8/fnwfPyK+9+3vT3enW/TjznRvuiW/fW/5yfe3pvfwAX9hv+af+1+e8C/8z5fTff343t4d73N5I2y5u/f/AKmn3Q1uAAAA
5CBF04B82E35078AFABA41E6EAAFF03B	1	cxsmiles	JChemExcel2wAAAB+LCAAAAAAABADtvQdgHEmWJSYvbcp7f0r1StfgdKEIgGATJNiQQBDswYjN5pLsHWlHIymrKoHKZVZlXWYWQMztnbz33nvvvffee++997o7nU4n99//P1xmZAFs9s5K2smeIYCqyB8/fnwfPyK+9+3vf3myu0U/7pzwv1tfnuzxL1/q3/LVl/y795H3xgv/dfudQum167TtfyfYGKwIjc9O/JZemyhA++H/A4Ww/pvbAAAA
0F73D323AACC01612E958B9F3452A2C6	1	cxsmiles	JChemExcelWgEAAB+LCAAAAAAABADtvQdgHEmWJSYvbcp7f0r1StfgdKEIgGATJNiQQBDswYjN5pLsHWlHIymrKoHKZVZlXWYWQMztnbz33nvvvffee++997o7nU4n99//P1xmZAFs9s5K2smeIYCqyB8/fnwfPyK+9+3vf3myRf/e2TrZ+uzLO1+e7PJf9MfJnn7xJX+jf+AfbUCf3dvqfSyveL/zr/v8w3SlH8UB31MEvL6n96b8Z+Tfe9KYO9xS5PmjvQHUNv/5woyeOt0d7HRX/t34/f8D+TuPyVoBAAA=
740E69C54DD0E0AAB2DC1D8A0A224C8B	1	cxsmiles	JChemExcelvAAAAB+LCAAAAAAABADtvQdgHEmWJSYvbcp7f0r1StfgdKEIgGATJNiQQBDswYjN5pLsHWlHIymrKoHKZVZlXWYWQMztnbz33nvvvffee++997o7nU4n99//P1xmZAFs9s5K2smeIYCqyB8/fnwfPyK+9+3vn2x9drI73Ztu0e93Iv/uve5+qT939+683vrsyzv4/4utE/6Q/8H/h//0fn2xO/D5Bmgnu+bT/wcCt5VpvAAAAA==
BCA83E4DAF526141A09EBA79AB26A791	1	cxsmiles	JChemExcel9wEAAB+LCAAAAAAABADtvQdgHEmWJSYvbcp7f0r1StfgdKEIgGATJNiQQBDswYjN5pLsHWlHIymrKoHKZVZlXWYWQMztnbz33nvvvffee++997o7nU4n99//P1xmZAFs9s5K2smeIYCqyB8/fnwfPyK+9+3vf3myRf/e4X9OdvmH+ejLkz352Px5L/zT/Nz3P+7+en/L+8v7cqD5p/LjQe+LA0Xt4daLge7i/fCvDzf07kGnbjcA8Qf1Kf/Y77b7kn8XMn3pfW7/NkTrfh68L1Q31A8myG8WeWVjG53c7337+/8PfnGwwvcBAAA=
6F06BC71EF9983874D0BE2D1A228F058	1	cxsmiles	JChemExcelfwAAAB+LCAAAAAAABADtvQdgHEmWJSYvbcp7f0r1StfgdKEIgGATJNiQQBDswYjN5pLsHWlHIymrKoHKZVZlXWYWQMztnbz33nvvvffee++997o7nU4n99//P1xmZAFs9s5K2smeIYCqyB8/fnwfPyK+9+3vT3enW/Tjjv6792Jres98Enxz7/V0b7qLX0+2nt2h/z2jX/DnlnwW+/XFlvdH57vvffv7/w/pw2ZmfwAAAA==
3A7668B47C6930967F7FCC4AECB997E5	1	cxsmiles	JChemExcelmQAAAB+LCAAAAAAABADtvQdgHEmWJSYvbcp7f0r1StfgdKEIgGATJNiQQBDswYjN5pLsHWlHIymrKoHKZVZlXWYWQMztnbz33nvvvffee++997o7nU4n99//P1xmZAFs9s5K2smeIYCqyB8/fnwfPyK+9+3vn2zRP3f4H/3V+4Q/3d378mRXGsgP+nP35N7Wl/R/7zX+VT/Z/+yEwHz2JTXdd4B6PQnMe90O9z778v8BFwgdkZkAAAA=
3043EF326EB3F823531BFD4C1D629312	1	cxsmiles	JChemExcel4AAAAB+LCAAAAAAABADtvQdgHEmWJSYvbcp7f0r1StfgdKEIgGATJNiQQBDswYjN5pLsHWlHIymrKoHKZVZlXWYWQMztnbz33nvvvffee++997o7nU4n99//P1xmZAFs9s5K2smeIYCqyB8/fnwfPyK+9+3vT3enW/TjjvlXf+7i3xP+nf/53otPvr/l/41fOn97f/6/4dfvffv7/w8Hxa+d4AAAAA==
E66C697E7623B8254674AAD3565FF802	1	cxsmiles	JChemExcelggAAAB+LCAAAAAAABADtvQdgHEmWJSYvbcp7f0r1StfgdKEIgGATJNiQQBDswYjN5pLsHWlHIymrKoHKZVZlXWYWQMztnbz33nvvvffee++997o7nU4n99//P1xmZAFs9s5K2smeIYCqyB8/fnwfPyK+9+3vv/jsZPdki36585n8ONn77ORe+MnWC/7pf3TvM3yKtrvSBP9qa/sr/j/dnfLvkX/x5v8D7lvBy4IAAAA=
ECF34F335C5D5930D77C0DC4C6C3AEF7	1	cxsmiles	JChemExcelNwAAAB+LCAAAAAAABADtvQdgHEmWJSYvbcp7f0r1StfgdKEIgGATJNiQQBDswYjN5pLsHWlHIymrKoHKZVZlXWYWQMztnbz33nvvvffee++997o7nU4n99//P1xmZAFs9s5K2smeIYCqyB8/fnwfPyK+9+3vT3enW/Tjjvv34vtfnmx99uWdE/6E//Ea7H7v29//fwAQmYmYNwAAAA==
5CCA5943CA64AA8A1B2FC54DF6E54A14	1	cxsmiles	JChemExcelQwAAAB+LCAAAAAAABADtvQdgHEmWJSYvbcp7f0r1StfgdKEIgGATJNiQQBDswYjN5pLsHWlHIymrKoHKZVZlXWYWQMztnbz33nvvvffee++997o7nU4n99//P1xmZAFs9s5K2smeIYCqyB8/fnwfPyK+9+3vf3my9dmXd6a70y36407k393X3/v2xfdP+A/+x/v1e9/+/v8DHXFXE0MAAAA=
035C07FB4E37CF4FE76E99428F0B5C63	1	cxsmiles	JChemExcelvQAAAB+LCAAAAAAABADtvQdgHEmWJSYvbcp7f0r1StfgdKEIgGATJNiQQBDswYjN5pLsHWlHIymrKoHKZVZlXWYWQMztnbz33nvvvffee++997o7nU4n99//P1xmZAFs9s5K2smeIYCqyB8/fnwfPyK+9+3vT3enW/TjjvlXf+7i3xdbJ1uffXmn28T7l5ud7Eq7F3sn/Cn/c/Ove/zjdm29X3fNa/8PtXTLsr0AAAA=
01E275375532372C6D669AE206989B2A	1	cxsmiles	JChemExcelxwAAAB+LCAAAAAAABADtvQdgHEmWJSYvbcp7f0r1StfgdKEIgGATJNiQQBDswYjN5pLsHWlHIymrKoHKZVZlXWYWQMztnbz33nvvvffee++997o7nU4n99//P1xmZAFs9s5K2smeIYCqyB8/fnwfPyK+9+3vf3myRf/e2ZruTvmX6d5066S8o394v+7hG/nQ/OR/d/funGw9u0P/e3ZHYeEf79cXW/HP47/eqlHY/v8BaWmKuMcAAAA=
60818C8AB7338825EDA0ECB080C46897	1	cxsmiles	JChemExcel0AAAAB+LCAAAAAAABADtvQdgHEmWJSYvbcp7f0r1StfgdKEIgGATJNiQQBDswYjN5pLsHWlHIymrKoHKZVZlXWYWQMztnbz33nvvvffee++997o7nU4n99//P1xmZAFs9s5K2smeIYCqyB8/fnwfPyK+9+3vfzndnW6dbH325Z2TLfrzDv8T/xX/n2592fuEPuNfdv3XdvVtB/j2nWjLk136sdX7bsOf/w+QSahx0AAAAA==
CAF952987FF355668053AB15A5353B36	1	cxsmiles	JChemExcelxQAAAB+LCAAAAAAABADtvQdgHEmWJSYvbcp7f0r1StfgdKEIgGATJNiQQBDswYjN5pLsHWlHIymrKoHKZVZlXWYWQMztnbz33nvvvffee++997o7nU4n99//P1xmZAFs9s5K2smeIYCqyB8/fnwfPyK+9+3vfzndnW6dbH325Z2TLfrzDv8T/xX/n259KT/ML7udBv6ruwrBAb99R9ryZJd+bA338b1vf///AbgKhsvFAAAA
727DE83E9E051BFE14610A4D416B15EB	1	cxsmiles	JChemExcelxQAAAB+LCAAAAAAABADtvQdgHEmWJSYvbcp7f0r1StfgdKEIgGATJNiQQBDswYjN5pLsHWlHIymrKoHKZVZlXWYWQMztnbz33nvvvffee++997o7nU4n99//P1xmZAFs9s5K2smeIYCqyB8/fnwfPyK+9+3vfzndnW7RzzvTrS9P+Bf+Rz6hz/iX3ZOtz768430d/7X7za42cO++DxxuebJLP7aG+/jet7///wBhBZcpxQAAAA==
852228D1FC88045C703B93BB5E89C911	1	cxsmiles	JChemExcelpgAAAB+LCAAAAAAABADtvQdgHEmWJSYvbcp7f0r1StfgdKEIgGATJNiQQBDswYjN5pLsHWlHIymrKoHKZVZlXWYWQMztnbz33nvvvffee++997o7nU4n99//P1xmZAFs9s5K2smeIYCqyB8/fnwfPyK+9+3vf3myRf/e4X+8X1/sDny+Ff/cb7I3vTfl3yL/3nvd/fKkNL/u3Qsg7vKP7337+/8PdppTx6YAAAA=
5AEA6AB87A76539EB724602B33911835	1	cxsmiles	JChemExcelhgAAAB+LCAAAAAAABADtvQdgHEmWJSYvbcp7f0r1StfgdKEIgGATJNiQQBDswYjN5pLsHWlHIymrKoHKZVZlXWYWQMztnbz33nvvvffee++997o7nU4n99//P1xmZAFs9s5K2smeIYCqyB8/fnwfPyK+9+3vT3enW/TjznTrpDT/THfxyckuf3GydbL12Zd3vjzhv/Qj+yv+/9nJ1ovP0Cz41L7eebkP4P8BVdy1fIYAAAA=
B9572FDA8B1308230DD6FEB6A9985EC7	1	cxsmiles	JChemExcelgwAAAB+LCAAAAAAABADtvQdgHEmWJSYvbcp7f0r1StfgdKEIgGATJNiQQBDswYjN5pLsHWlHIymrKoHKZVZlXWYWQMztnbz33nvvvffee++997o7nU4n99//P1xmZAFs9s5K2smeIYCqyB8/fnwfPyK+9+3vn2x9drI73Ztu0e93Iv/ufXnCv+hfg+129+54Db1fX2x5f3S++963v///AEyWco2DAAAA
7C002AC38D7380C43EA1048D34AD4D37	1	cxsmiles	JChemExcelggAAAB+LCAAAAAAABADtvQdgHEmWJSYvbcp7f0r1StfgdKEIgGATJNiQQBDswYjN5pLsHWlHIymrKoHKZVZlXWYWQMztnbz33nvvvffee++997o7nU4n99//P1xmZAFs9s5K2smeIYCqyB8/fnwfPyK+9+3vv9g62aIfd/gf/N/7s/frZye7070p/xr5dy/+6oY3dvf+H1RXa0KCAAAA
27FA633908D9129B30181F9B4D1520BC	1	cxsmiles	JChemExceldwAAAB+LCAAAAAAABADtvQdgHEmWJSYvbcp7f0r1StfgdKEIgGATJNiQQBDswYjN5pLsHWlHIymrKoHKZVZlXWYWQMztnbz33nvvvffee++997o7nU4n99//P1xmZAFs9s5K2smeIYCqyB8/fnwfPyK+9+3vf3mydbL12Zd3XmzRH3emu1P5qf+e/PgL+ne6i79Otp7dof/RPyf8Lf8jX9g/XwMU/t8F9Mz8BlD/D1NWWz93AAAA
8CC7A84DED74967CC745E20B97AD5A61	1	cxsmiles	JChemExcelWgAAAB+LCAAAAAAABADtvQdgHEmWJSYvbcp7f0r1StfgdKEIgGATJNiQQBDswYjN5pLsHWlHIymrKoHKZVZlXWYWQMztnbz33nvvvffee++997o7nU4n99//P1xmZAFs9s5K2smeIYCqyB8/fnwfPyK+9+3vv9g92frsyzsvtvjHyS79pE/v8D/4f+fP6e6Ufzf/0n+70uzZHfrfMwJEYD778v8BUlae71oAAAA=
C65A230E6A50AF7B6CA21C6D84041A67	1	cxsmiles	JChemExceldwAAAB+LCAAAAAAABADtvQdgHEmWJSYvbcp7f0r1StfgdKEIgGATJNiQQBDswYjN5pLsHWlHIymrKoHKZVZlXWYWQMztnbz33nvvvffee++997o7nU4n99//P1xmZAFs9s5K2smeIYCqyB8/fnwfPyK+9+3vn2zRP3f4ny9fbn32+s7Wl95H+P9r/ftk67Mv7/hfdtoF32xs+v8AO66TincAAAA=
3036417D4B24CE0C01F9A812E2142BC1	1	cxsmiles	JChemExcelfgAAAB+LCAAAAAAABADtvQdgHEmWJSYvbcp7f0r1StfgdKEIgGATJNiQQBDswYjN5pLsHWlHIymrKoHKZVZlXWYWQMztnbz33nvvvffee++997o7nU4n99//P1xmZAFs9s5K2smeIYCqyB8/fnwfPyK+9+3vn2x9drJFP+9Md6fyc+tL+YD/ufUnu/iXgH1558Uu/5AGCtxrfbJrXvp/ABH0kRZ+AAAA
06BC7700A1977DEBF8C739B48307532A	1	cxsmiles	JChemExcel2wAAAB+LCAAAAAAABADtvQdgHEmWJSYvbcp7f0r1StfgdKEIgGATJNiQQBDswYjN5pLsHWlHIymrKoHKZVZlXWYWQMztnbz33nvvvffee++997o7nU4n99//P1xmZAFs9s5K2smeIYCqyB8/fnwfPyK+9+3vv9iif+6cbJ3wT/6Hf+n87f1p3vjsS//Tk1392H3i/bq39eWXJ/e2vtzDr90v9wfe1KbdL+/5b3W/3DWf/j9KqvKw2wAAAA==
B1B09C0841C1E1E0128EA842E331876A	1	cxsmiles	JChemExcelsAAAAB+LCAAAAAAABADtvQdgHEmWJSYvbcp7f0r1StfgdKEIgGATJNiQQBDswYjN5pLsHWlHIymrKoHKZVZlXWYWQMztnbz33nvvvffee++997o7nU4n99//P1xmZAFs9s5K2smeIYCqyB8/fnwfPyK+9+3vv9iif+682DrZ/ezFCf/O/3i/vt69M92d8q/Bv3snW599eWd6L/KV/HvvxdZ0d88H5f1KPUY/7/wZfvP/ABzjUyqwAAAA
ABAC735F6F449D104A007C7AE6E65A8E	1	cxsmiles	JChemExcelYgAAAB+LCAAAAAAABADtvQdgHEmWJSYvbcp7f0r1StfgdKEIgGATJNiQQBDswYjN5pLsHWlHIymrKoHKZVZlXWYWQMztnbz33nvvvffee++997o7nU4n99//P1xmZAFs9s5K2smeIYCqyB8/fnwfPyK+9+3vvz7Z/exk68VnL6Z70y36+47596Q0v+7h3xf8+8nWZ1/eebF7wn/It7vha96/u9/79vf/H+joBaJiAAAA
A535CA61D7DAA374FABBCBE927089677	1	cxsmiles	JChemExcelYAAAAB+LCAAAAAAABADtvQdgHEmWJSYvbcp7f0r1StfgdKEIgGATJNiQQBDswYjN5pLsHWlHIymrKoHKZVZlXWYWQMztnbz33nvvvffee++997o7nU4n99//P1xmZAFs9s5K2smeIYCqyB8/fnwfPyK+9+3vvz7Z/exk68VnL6Z70y36+47595n5bQ//vuDfT7Y++/LOi90T/kO+3Q3fOinNr7vf+/b3/x+02uSTYAAAAA==
EBA07DC61CEF78AB30CCA3C611E8B57A	1	cxsmiles	JChemExcelkAAAAB+LCAAAAAAABADtvQdgHEmWJSYvbcp7f0r1StfgdKEIgGATJNiQQBDswYjN5pLsHWlHIymrKoHKZVZlXWYWQMztnbz33nvvvffee++997o7nU4n99//P1xmZAFs9s5K2smeIYCqyB8/fnwfPyK+9+3vf3myu0U/7nx5sqc/7219SX/snfCfW/oD//R/9T7hT/d67e65L3e7X/b//H8AOAlj8pAAAAA=
3BD8E14413FC7C7E7236B3B14C2965ED	1	cxsmiles	JChemExceliQAAAB+LCAAAAAAABADtvQdgHEmWJSYvbcp7f0r1StfgdKEIgGATJNiQQBDswYjN5pLsHWlHIymrKoHKZVZlXWYWQMztnbz33nvvvffee++997o7nU4n99//P1xmZAFs9s5K2smeIYCqyB8/fnwfPyK+9+3vfzndnW7RzzvmX/25++UJ/8L/4P8nu/zrl9M922ZLmnwmPzrttc3eAJzw0/8HWUTdu4kAAAA=
1F3AAFE4028EC26AB68970AF44E00AD6	1	cxsmiles	JChemExcelZwAAAB+LCAAAAAAABADtvQdgHEmWJSYvbcp7f0r1StfgdKEIgGATJNiQQBDswYjN5pLsHWlHIymrKoHKZVZlXWYWQMztnbz33nvvvffee++997o7nU4n99//P1xmZAFs9s5K2smeIYCqyB8/fnwfPyK+9+3vf3myRf/e4X9OdvnHiy3vs+nedOvZneD/e8/u+C/Jr1/2fhdg+P3/AU3omHFnAAAA
F11ACC1C1BA9EA641A95419EB83B0BED	1	cxsmiles	JChemExcelHgAAAB+LCAAAAAAABADtvQdgHEmWJSYvbcp7f0r1StfgdKEIgGATJNiQQBDswYjN5pLsHWlHIymrKoHKZVZlXWYWQMztnbz33nvvvffee++997o7nU4n99//P1xmZAFs9s5K2smeIYCqyB8/fnwfPyK+9+3vv9iif+5872X7/a2T8g7+r598+/v/DyOlE4EeAAAA
1C36517DF6ED3FFDDD3AE6BA7118B8AE	1	cxsmiles	JChemExcelCAEAAB+LCAAAAAAABADtvQdgHEmWJSYvbcp7f0r1StfgdKEIgGATJNiQQBDswYjN5pLsHWlHIymrKoHKZVZlXWYWQMztnbz33nvvvffee++997o7nU4n99//P1xmZAFs9s5K2smeIYCqyB8/fnwfPyK+9+3vn2zRP3f4n/9P/Prly63vfblNf3z25Z0v402+9+KT72/5f+OXzt/hn/8POD35JwgBAAA=
6DED4F0DA0EEE9ED723CC0B7CDE77A82	1	cxsmiles	JChemExceluQAAAB+LCAAAAAAABADtvQdgHEmWJSYvbcp7f0r1StfgdKEIgGATJNiQQBDswYjN5pLsHWlHIymrKoHKZVZlXWYWQMztnbz33nvvvffee++997o7nU4n99//P1xmZAFs9s5K2smeIYCqyB8/fnwfPyK+9+3vf3my9dmXd0626Nc7/M+mXz87+dn9/Ha/fu/b3/9/AP0AwZO5AAAA
9EA61F205872C413AC65D92C96B25DEB	1	cxsmiles	JChemExcelYgAAAB+LCAAAAAAABADtvQdgHEmWJSYvbcp7f0r1StfgdKEIgGATJNiQQBDswYjN5pLsHWlHIymrKoHKZVZlXWYWQMztnbz33nvvvffee++997o7nU4n99//P1xmZAFs9s5K2smeIYCqyB8/fnwfPyK+9+3vv9id7k236Jc75l/9uXey9dmLE/5962T3sy/v6O/4hxvshq95/+6elHdebNErn335/wA5dkmUYgAAAA==
80C3736566AD647B0709FDC022443968	1	cxsmiles	JChemExcelYgAAAB+LCAAAAAAABADtvQdgHEmWJSYvbcp7f0r1StfgdKEIgGATJNiQQBDswYjN5pLsHWlHIymrKoHKZVZlXWYWQMztnbz33nvvvffee++997o7nU4n99//P1xmZAFs9s5K2smeIYCqyB8/fnwfPyK+9+3vv9id7k236Jc75l/9uXey9dmLE/5962T3s9d39Hf8ww12w9e8f3dPyjsvtj778s5nX/4/ex+DmmIAAAA=
066CC2E106FAF5E5A2B2EEA5C0C6F5DF	1	cxsmiles	JChemExcelawAAAB+LCAAAAAAABADtvQdgHEmWJSYvbcp7f0r1StfgdKEIgGATJNiQQBDswYjN5pLsHWlHIymrKoHKZVZlXWYWQMztnbz33nvvvffee++997o7nU4n99//P1xmZAFs9s5K2smeIYCqyB8/fnwfPyK+9+3vv9id7k236Jc75l/9uXfCP7de8A/942T3s9fmd/zDLXfD971/d0/KOy+2Pvvyzmdf/j9+umVIawAAAA==
B39477F7E79F95217DE0CA3163E70119	1	cxsmiles	JChemExcelawAAAB+LCAAAAAAABADtvQdgHEmWJSYvbcp7f0r1StfgdKEIgGATJNiQQBDswYjN5pLsHWlHIymrKoHKZVZlXWYWQMztnbz33nvvvffee++997o7nU4n99//P1xmZAFs9s5K2smeIYCqyB8/fnwfPyK+9+3vv9id7k236Jc75l/9uXfCP7de8A/942T3sy/N7/iHW+6G73v/7p6Ud15s0Sufffn/ADzTr0ZrAAAA
1B2FE3611859316F5E1EA99D341E8A00	1	cxsmiles	JChemExcelYgAAAB+LCAAAAAAABADtvQdgHEmWJSYvbcp7f0r1StfgdKEIgGATJNiQQBDswYjN5pLsHWlHIymrKoHKZVZlXWYWQMztnbz33nvvvffee++997o7nU4n99//P1xmZAFs9s5K2smeIYCqyB8/fnwfPyK+9+3vfzndnW7RzzvTrWf0f/53F3+f7H724oS/2TrZ+uz1nRfSas+0ln/15+4eff/Zl3fof/oO/vnet7///wB6QjWBYgAAAA==
9B876DF7D021DAAFD684CD2F3E32BDCB	1	cxsmiles	JChemExceldAAAAB+LCAAAAAAABADtvQdgHEmWJSYvbcp7f0r1StfgdKEIgGATJNiQQBDswYjN5pLsHWlHIymrKoHKZVZlXWYWQMztnbz33nvvvffee++997o7nU4n99//P1xmZAFs9s5K2smeIYCqyB8/fnwfPyK+9+3vf3myRf/e2ZruTvmXyL+7+Pdkl/842frsyzvmneBz+8l0dykvLrf0Vffd9779/f8HVGBy1HQAAAA=
07502BC11C15707706B1487B69F1BB00	1	cxsmiles	JChemExceldwAAAB+LCAAAAAAABADtvQdgHEmWJSYvbcp7f0r1StfgdKEIgGATJNiQQBDswYjN5pLsHWlHIymrKoHKZVZlXWYWQMztnbz33nvvvffee++997o7nU4n99//P1xmZAFs9s5K2smeIYCqyB8/fnwfPyK+9+3vf3my+9nJ3ost+vXOCf/72Unwx97J1mdf0l/68XRvKj+3vpQP+B/5ZODzPQa3qwC+9+3v/z9lOdLhdwAAAA==
3406E78B80E87A70A9414F5F2A217688	1	cxsmiles	JChemExcelbwAAAB+LCAAAAAAABADtvQdgHEmWJSYvbcp7f0r1StfgdKEIgGATJNiQQBDswYjN5pLsHWlHIymrKoHKZVZlXWYWQMztnbz33nvvvffee++997o7nU4n99//P1xmZAFs9s5K2smeIYCqyB8/fnwfPyK+9+3vf3my+9nJ3ost+vXOCf/72cmW+WXvZOuzL+njz+QDbrOrf0x3p/JT/9WfuwLo2R363zOFaF7+fwAsVMwLbwAAAA==
2A344C2598A51CA04D1F94FEF2FD65AC	1	cxsmiles	JChemExcelggAAAB+LCAAAAAAABADtvQdgHEmWJSYvbcp7f0r1StfgdKEIgGATJNiQQBDswYjN5pLsHWlHIymrKoHKZVZlXWYWQMztnbz33nvvvffee++997o7nU4n99//P1xmZAFs9s5K2smeIYCqyB8/fnwfPyK+9+3vf3my+9nJ3ost+vXOCf/72cmW+WXvZOuzL+njz+QDbrOrf0x3p/Jz60v5wDYZ/HzXdWI+/H8AUiiJr4IAAAA=
E24ABAA21D3EC0DB3D3214830158E519	1	cxsmiles	JChemExcelbwAAAB+LCAAAAAAABADtvQdgHEmWJSYvbcp7f0r1StfgdKEIgGATJNiQQBDswYjN5pLsHWlHIymrKoHKZVZlXWYWQMztnbz33nvvvffee++997o7nU4n99//P1xmZAFs9s5K2smeIYCqyB8/fnwfPyK+9+3vf3my+9nJ3ost+vXOCf/72cmW+WXvZOuzL+njz+SD6d5Ufuq/+nNP3n12h/737A7g8ecOovnz/wH4UNxWbwAAAA==
8A311A72F609E53742ED35241F216442	1	cxsmiles	JChemExcelggAAAB+LCAAAAAAABADtvQdgHEmWJSYvbcp7f0r1StfgdKEIgGATJNiQQBDswYjN5pLsHWlHIymrKoHKZVZlXWYWQMztnbz33nvvvffee++997o7nU4n99//P1xmZAFs9s5K2smeIYCqyB8/fnwfPyK+9+3vf3my+9nJ3ost+vXOCf/72cmW+WXvZOuzL+njz+SD6d5Ufm59KR/wP/LJwOd7DHdXAbhOzJ//D/fy0N2CAAAA
8E2FE4A75B487EE9EA6573AA85B14636	1	cxsmiles	JChemExcelXwAAAB+LCAAAAAAABADtvQdgHEmWJSYvbcp7f0r1StfgdKEIgGATJNiQQBDswYjN5pLsHWlHIymrKoHKZVZlXWYWQMztnbz33nvvvffee++997o7nU4n99//P1xmZAFs9s5K2smeIYCqyB8/fnwfPyK+9+3vT3enW/TjznRruvXlydZnX9454b/5H/mC/93Vjzvfbvzz/wG+5T7VXwAAAA==
26A39BB0AD4E3EEC3F4BFA27F7E71E0C	1	cxsmiles	JChemExcelLAEAAB+LCAAAAAAABADtvQdgHEmWJSYvbcp7f0r1StfgdKEIgGATJNiQQBDswYjN5pLsHWlHIymrKoHKZVZlXWYWQMztnbz33nvvvffee++997o7nU4n99//P1xmZAFs9s5K2smeIYCqyB8/fnwfPyK+9+3vf3myRf/e2ZIfn53oL/wP/j/8Z/Cia7Drf9n9da/X/J7fxiAT9vbZyX6/r/6vX/Lv+zcN4N6GBv6vu3thu/8HuR6FnSwBAAA=
63F986E66B70AB97E4815AA27498C164	1	cxsmiles	JChemExcelIQEAAB+LCAAAAAAABADtvQdgHEmWJSYvbcp7f0r1StfgdKEIgGATJNiQQBDswYjN5pLsHWlHIymrKoHKZVZlXWYWQMztnbz33nvvvffee++997o7nU4n99//P1xmZAFs9s5K2smeIYCqyB8/fnwfPyK+9+3vf3myRf/e2ZIfn53oL/wP/j/8Z/Cia7Drf9n9da/X/J7f5kv3+2cn+/0O+r/KG/s3YX1vQwP/1929sN3/A/GLDiEhAQAA
40A8A6EF449CED108BE07AF6D5C4D02E	1	cxsmiles	JChemExcelYQAAAB+LCAAAAAAABADtvQdgHEmWJSYvbcp7f0r1StfgdKEIgGATJNiQQBDswYjN5pLsHWlHIymrKoHKZVZlXWYWQMztnbz33nvvvffee++997o7nU4n99//P1xmZAFs9s5K2smeIYCqyB8/fnwfPyK+9+3vf3my9dmXd0626Nc7/M+LXfrk9Z3X9K98an+Z7k3lZ//fPWlogfCfu599+f8AJbfM02EAAAA=
01AB874BBBF08628EDF50F0E7BFB171A	1	cxsmiles	JChemExcelZAAAAB+LCAAAAAAABADtvQdgHEmWJSYvbcp7f0r1StfgdKEIgGATJNiQQBDswYjN5pLsHWlHIymrKoHKZVZlXWYWQMztnbz33nvvvffee++997o7nU4n99//P1xmZAFs9s5K2smeIYCqyB8/fnwfPyK+9+3vfzndnW7Rzzvm3+le+Df+XU539+683vrsyzv4/wl/tnXi/Y5/8P/IZ/8PF/aAtGQAAAA=
010988B5FC05572CF11C882E3301EF45	1	cxsmiles	JChemExceloAAAAB+LCAAAAAAABADtvQdgHEmWJSYvbcp7f0r1StfgdKEIgGATJNiQQBDswYjN5pLsHWlHIymrKoHKZVZlXWYWQMztnbz33nvvvffee++997o7nU4n99//P1xmZAFs9s5K2smeIYCqyB8/fnwfPyK+9+3vfzndnW7Rzzvm3+le+Df+XU539+683vrsyzv4/8kuf3iy9dmLWGP9d+/FZye7XeDev7vy78bv/x+2wbzMoAAAAA==
8D9210A294ECA87007642FFCC95A2C1B	1	cxsmiles	JChemExcelmwAAAB+LCAAAAAAABADtvQdgHEmWJSYvbcp7f0r1StfgdKEIgGATJNiQQBDswYjN5pLsHWlHIymrKoHKZVZlXWYWQMztnbz33nvvvffee++997o7nU4n99//P1xmZAFs9s5K2smeIYCqyB8/fnwfPyK+9+3vfzndnW7Rzzvm3+le+Df+XU539+683vrsyzv4/8kuf3iy9dkL03gZvLP34rOT3S5c799d+Xfj9/8PHOF3QJsAAAA=
CDCC0047FA463D8FB47238E072507107	1	cxsmiles	JChemExceleAAAAB+LCAAAAAAABADtvQdgHEmWJSYvbcp7f0r1StfgdKEIgGATJNiQQBDswYjN5pLsHWlHIymrKoHKZVZlXWYWQMztnbz33nvvvffee++997o7nU4n99//P1xmZAFs9s5K2smeIYCqyB8/fnwfPyK+9+3vfzndnW7Rzzvm3+le+Df+XU539+683vrsyzv4/8kuf3iy9dmLE/5N/7S/vvjsZNf7s/Pt9779/f8Hiwpk8XgAAAA=
5B1BC59AAFDDA62B4CA54EA837C7EA99	1	cxsmiles	JChemExcelXAAAAB+LCAAAAAAABADtvQdgHEmWJSYvbcp7f0r1StfgdKEIgGATJNiQQBDswYjN5pLsHWlHIymrKoHKZVZlXWYWQMztnbz33nvvvffee++997o7nU4n99//P1xmZAFs9s5K2smeIYCqyB8/fnwfPyK+9+3vn2zRP3c+O9mSX/gf/P9kl3/1PvV/3dv6kv7vtes0+N63v///AERbnAVcAAAA
34A67F75B204D73733E81B7A73E4AC46	1	cxsmiles	JChemExcelhgAAAB+LCAAAAAAABADtvQdgHEmWJSYvbcp7f0r1StfgdKEIgGATJNiQQBDswYjN5pLsHWlHIymrKoHKZVZlXWYWQMztnbz33nvvvffee++997o7nU4n99//P1xmZAFs9s5K2smeIYCqyB8/fnwfPyK+9+3vn2ydbNGPO5/JD/m3++t0dyo/5d+9L73vvpzuTXcDCJ99eefFbhyQ/+su//jet7///wC2aK3DhgAAAA==
580CA9128E0C65E5256934973E34C682	1	cxsmiles	JChemExcel3gAAAB+LCAAAAAAABADtvQdgHEmWJSYvbcp7f0r1StfgdKEIgGATJNiQQBDswYjN5pLsHWlHIymrKoHKZVZlXWYWQMztnbz33nvvvffee++997o7nU4n99//P1xmZAFs9s5K2smeIYCqyB8/fnwfPyK+9+3vfzndnW7RzzvTLfOT/9398oR/4X/w/5Nd/vXL6Z5p9+XJPflIW3ovfHmyP/QVw5I/v+z9rm9tbKOderjKF9O9k63PvjR4fu/b3/9/ADZOuO/eAAAA
70D2DA99430CC5909773A055EB65510B	1	cxsmiles	JChemExcelXgAAAB+LCAAAAAAABADtvQdgHEmWJSYvbcp7f0r1StfgdKEIgGATJNiQQBDswYjN5pLsHWlHIymrKoHKZVZlXWYWQMztnbz33nvvvffee++997o7nU4n99//P1xmZAFs9s5K2smeIYCqyB8/fnwfPyK+9+3vv9id7k236Jc7kX/3Xi9jX+6d7PIvJ1uffXnnyxP+XT+wv37v29//fwD0alfIXgAAAA==
8088CB2E4B4B8EF5C4CC7433FACFDEF6	1	cxsmiles	JChemExcelXQAAAB+LCAAAAAAABADtvQdgHEmWJSYvbcp7f0r1StfgdKEIgGATJNiQQBDswYjN5pLsHWlHIymrKoHKZVZlXWYWQMztnbz33nvvvffee++997o7nU4n99//P1xmZAFs9s5K2smeIYCqyB8/fnwfPyK+9+3vv9id7k236Jc7kX/3Xi/py5Oy8+nJLv9ysvXZl3e+POHf9QP76/e+/f3/BykslRBdAAAA
8FA3ADDCCA3E3FF809B6A1742845E220	1	cxsmiles	JChemExcelaAAAAB+LCAAAAAAABADtvQdgHEmWJSYvbcp7f0r1StfgdKEIgGATJNiQQBDswYjN5pLsHWlHIymrKoHKZVZlXWYWQMztnbz33nvvvffee++997o7nU4n99//P1xmZAFs9s5K2smeIYCqyB8/fnwfPyK+9+3vv9id7k236Jc7kX/3Tvgn/7OMNds72eVfTrY++/LOl15r79fvffv7/w+t5FgxaAAAAA==
FDAC20118A753AB78B57D5E1B96ED87C	1	cxsmiles	JChemExcelwQAAAB+LCAAAAAAABADtvQdgHEmWJSYvbcp7f0r1StfgdKEIgGATJNiQQBDswYjN5pLsHWlHIymrKoHKZVZlXWYWQMztnbz33nvvvffee++997o7nU4n99//P1xmZAFs9s5K2smeIYCqyB8/fnwfPyK+9+3vT3eX0y36eWe5Nd3FzxP+i/852d360v9Tfv1y12/z5XRX3jf/6k+G9WK3/zp/vnWy9dmX/if9ns2nXfgnpfl196T8fwC2ntyuwQAAAA==
1F28AEA270F7713673E881498E8027D7	1	cxsmiles	JChemExcelfwAAAB+LCAAAAAAABADtvQdgHEmWJSYvbcp7f0r1StfgdKEIgGATJNiQQBDswYjN5pLsHWlHIymrKoHKZVZlXWYWQMztnbz33nvvvffee++997o7nU4n99//P1xmZAFs9s5K2smeIYCqyB8/fnwfPyK+9+3vT3enW/Tjjv67d7L12cm96X7wof/vPjX48s6GBvf26f/D38rre9Pd7337+/8P34MNfn8AAAA=
5DD2D01610CC404E9A2EB9BE4A380C4F	1	cxsmiles	JChemExcelsAAAAB+LCAAAAAAABADtvQdgHEmWJSYvbcp7f0r1StfgdKEIgGATJNiQQBDswYjN5pLsHWlHIymrKoHKZVZlXWYWQMztnbz33nvvvffee++997o7nU4n99//P1xmZAFs9s5K2smeIYCqyB8/fnwfPyK+9+3vv9g62frsyzvT3ekW/XVnudya7p7wr/wP/r9tvjT/npTm11386zXvtvSbvfDh9n/tdOo32DWf/j/SPCFjsAAAAA==
553A94F01122563CDFE15A34DA927C97	1	cxsmiles	JChemExcelkwAAAB+LCAAAAAAABADtvQdgHEmWJSYvbcp7f0r1StfgdKEIgGATJNiQQBDswYjN5pLsHWlHIymrKoHKZVZlXWYWQMztnbz33nvvvffee++997o7nU4n99//P1xmZAFs9s5K2smeIYCqyB8/fnwfPyK+9+3vT3eXW/TjznRvKj/7/+5Nd0/4N/7nhf+H//mW90cH2r0vve++nN6b7nVePtnlH9/79vf/H9HSQJiTAAAA
AD3314937D698C7E85CBD9635AA3C313	1	cxsmiles	JChemExcelQQAAAB+LCAAAAAAABADtvQdgHEmWJSYvbcp7f0r1StfgdKEIgGATJNiQQBDswYjN5pLsHWlHIymrKoHKZVZlXWYWQMztnbz33nvvvffee++997o7nU4n99//P1xmZAFs9s5K2smeIYCqyB8/fnwfPyK+9+3vfzndnW49uzPdot/veL/tvvjsBb6Sj+Xfk9J9u/XZl3c++/L/AVr7CSxBAAAA
734F00092DECE5396F9AFE577E53FE06	1	cxsmiles	JChemExcelQgAAAB+LCAAAAAAABADtvQdgHEmWJSYvbcp7f0r1StfgdKEIgGATJNiQQBDswYjN5pLsHWlHIymrKoHKZVZlXWYWQMztnbz33nvvvffee++997o7nU4n99//P1xmZAFs9s5K2smeIYCqyB8/fnwfPyK+9+3vfzndnW7RzzvBv3vT3ZOtz7688+UJ/72lP/AP/n+yZ379fwBT5JLhQgAAAA==
CFAD9EA8B5657738C375D94A9A633C02	1	cxsmiles	JChemExcelQwAAAB+LCAAAAAAABADtvQdgHEmWJSYvbcp7f0r1StfgdKEIgGATJNiQQBDswYjN5pLsHWlHIymrKoHKZVZlXWYWQMztnbz33nvvvffee++997o7nU4n99//P1xmZAFs9s5K2smeIYCqyB8/fnwfPyK+9+3vfzndnW7RzzvBv3vT3ZOtz7688+UJ/72lP/AP/n+yx79++b1vf///AZtr9cNDAAAA
BCE0DED12FC98EB9F8D50C03A16088BC	1	cxsmiles	JChemExcelgQAAAB+LCAAAAAAABADtvQdgHEmWJSYvbcp7f0r1StfgdKEIgGATJNiQQBDswYjN5pLsHWlHIymrKoHKZVZlXWYWQMztnbz33nvvvffee++997o7nU4n99//P1xmZAFs9s5K2smeIYCqyB8/fnwfPyK+9+3vT3enW/TjjvmX/tvFby+2PvvyDv3vZJe/ONk6wQdfnvBf/A/+/9nJ1ovP8F3wqX0n8kb45/8D7gGC/oEAAAA=
799A24ACE9B06009A7FC92C2FD589543	1	cxsmiles	JChemExceltwAAAB+LCAAAAAAABADtvQdgHEmWJSYvbcp7f0r1StfgdKEIgGATJNiQQBDswYjN5pLsHWlHIymrKoHKZVZlXWYWQMztnbz33nvvvffee++997o7nU4n99//P1xmZAFs9s5K2smeIYCqyB8/fnwfPyK+9+3vv9iif+6c8L8bfr1lsx/Cr9/79vf/H4DUoku3AAAA
A1216D131B605AA55FA80034755B32F8	1	cxsmiles	JChemExcelrAAAAB+LCAAAAAAABADtvQdgHEmWJSYvbcp7f0r1StfgdKEIgGATJNiQQBDswYjN5pLsHWlHIymrKoHKZVZlXWYWQMztnbz33nvvvffee++997o7nU4n99//P1xmZAFs9s5K2smeIYCqyB8/fnwfPyK+9+3vv9iif+6c8L/dXzd998P99Xvf/v7/A+eJY7+sAAAA
9B46A0361640AC1366DDA75C36356BA5	1	cxsmiles	JChemExcelzAAAAB+LCAAAAAAABADtvQdgHEmWJSYvbcp7f0r1StfgdKEIgGATJNiQQBDswYjN5pLsHWlHIymrKoHKZVZlXWYWQMztnbz33nvvvffee++997o7nU4n99//P1xmZAFs9s5K2smeIYCqyB8/fnwfPyK+9+3vv9g62frsyzvT3ekW/XXH/Ks/d/HvCf/O/7zY9f7wP9/y/uh8d7JrP+338kJ+21uGXyz37mxP9+Sv8Ku9KF7f+/b3/x9m2KOzzAAAAA==
4BB4D0FB05A858E4C0C7F3F6C4060064	1	cxsmiles	JChemExcelYwAAAB+LCAAAAAAABADtvQdgHEmWJSYvbcp7f0r1StfgdKEIgGATJNiQQBDswYjN5pLsHWlHIymrKoHKZVZlXWYWQMztnbz33nvvvffee++997o7nU4n99//P1xmZAFs9s5K2smeIYCqyB8/fnwfPyK+9+3vT3enW/Tjjv67d3Lvs5Otk63PvrzD/0z3prv44oS/3ur9+uW9O1veB53vv/ft7/8/mtYCgGMAAAA=
972998AF74593E38B8E5D23F03B48E9E	1	cxsmiles	JChemExcelagAAAB+LCAAAAAAABADtvQdgHEmWJSYvbcp7f0r1StfgdKEIgGATJNiQQBDswYjN5pLsHWlHIymrKoHKZVZlXWYWQMztnbz33nvvvffee++997o7nU4n99//P1xmZAFs9s5K2smeIYCqyB8/fnwfPyK+9+3vT3eb6daLz16cbNEfd/gf79cXeydbn315Z3pvyn9G/r13skcNltPd7elu+PUz89vu9779/f8Hl82ngmoAAAA=
BA52549A2F42E9B38985D1A5853B76AB	1	cxsmiles	JChemExceleAAAAB+LCAAAAAAABADtvQdgHEmWJSYvbcp7f0r1StfgdKEIgGATJNiQQBDswYjN5pLsHWlHIymrKoHKZVZlXWYWQMztnbz33nvvvffee++997o7nU4n99//P1xmZAFs9s5K2smeIYCqyB8/fnwfPyK+9+3vT3eb6daLz16cbNEfd/gf79cXeydbn315Z3pvyn9G/r13skcNltPd7elu+PWXHhzv893vffv7/w9ffDKYeAAAAA==
94A71BD002AC8B323F61B04901B008EE	1	cxsmiles	JChemExcelawAAAB+LCAAAAAAABADtvQdgHEmWJSYvbcp7f0r1StfgdKEIgGATJNiQQBDswYjN5pLsHWlHIymrKoHKZVZlXWYWQMztnbz33nvvvffee++997o7nU4n99//P1xmZAFs9s5K2smeIYCqyB8/fnwfPyK+9+3vT3eb6daLz16cbNEfd/gf79cXeydbn315Z3pvyn9G/r13skcNltPd7elu+PVJaX7d/d63v///AKI8HJdrAAAA
3CDB4B8A7295484DA9FFCDF4AF358773	1	cxsmiles	JChemExcelcgAAAB+LCAAAAAAABADtvQdgHEmWJSYvbcp7f0r1StfgdKEIgGATJNiQQBDswYjN5pLsHWlHIymrKoHKZVZlXWYWQMztnbz33nvvvffee++997o7nU4n99//P1xmZAFs9s5K2smeIYCqyB8/fnwfPyK+9+3vT3eb6daLz16cbNEfd7ame1P+Jfz3SX1nuodftVXnV/x/Od3dnu6Gr+nPXfz7YuuzL+989uX/A8gPOE9yAAAA
A639F4BB9ED04F537131D4C1AE940C5C	1	cxsmiles	JChemExceltgAAAB+LCAAAAAAABADtvQdgHEmWJSYvbcp7f0r1StfgdKEIgGATJNiQQBDswYjN5pLsHWlHIymrKoHKZVZlXWYWQMztnbz33nvvvffee++997o7nU4n99//P1xmZAFs9s5K2smeIYCqyB8/fnwfPyK+9+3vv9h68dnJ7nRvukV/3In8u/dia8O3u3t3Tvg3/sf79cXuwOdb3h+d70523ae7n72IA3i9+/8ApubbJrYAAAA=
62DDD71C922D41FB95E02CA560A31ABB	1	cxsmiles	JChemExcelrQAAAB+LCAAAAAAABADtvQdgHEmWJSYvbcp7f0r1StfgdKEIgGATJNiQQBDswYjN5pLsHWlHIymrKoHKZVZlXWYWQMztnbz33nvvvffee++997o7nU4n99//P1xmZAFs9s5K2smeIYCqyB8/fnwfPyK+9+3vv9h68dnJ7nRvukV/3In8u/dia8O3u3t3Tvg3/sf79cVW/PPOn91vdj97Ef/29e7/AxpSm9utAAAA
49B4CF3A8281DC3F980A7EDA921F58DD	1	cxsmiles	JChemExcelNwAAAB+LCAAAAAAABADtvQdgHEmWJSYvbcp7f0r1StfgdKEIgGATJNiQQBDswYjN5pLsHWlHIymrKoHKZVZlXWYWQMztnbz33nvvvffee++997o7nU4n99//P1xmZAFs9s5K2smeIYCqyB8/fnwfPyK+9+3vv9g92frsyzsvtqZ7y+kWfXBnutXs0d/0If3vhD/if052+cf3vv39/wdTLBT8NwAAAA==
6E255DF014B3945EA749F7AC15BFB2CA	1	cxsmiles	JChemExcel4gAAAB+LCAAAAAAABADtvQdgHEmWJSYvbcp7f0r1StfgdKEIgGATJNiQQBDswYjN5pLsHWlHIymrKoHKZVZlXWYWQMztnbz33nvvvffee++997o7nU4n99//P1xmZAFs9s5K2smeIYCqyB8/fnwfPyK+9+3vT3enW/TjznTL/PzyhH/hf/iT3e4n3p/ery+2btUs+PXkx1/c2XIoDCAQQcmDNNzr9779/f8HoHTIu+IAAAA=
AF5CF807AD05DF2F39434E4088276B8F	1	cxsmiles	JChemExcelPAAAAB+LCAAAAAAABADtvQdgHEmWJSYvbcp7f0r1StfgdKEIgGATJNiQQBDswYjN5pLsHWlHIymrKoHKZVZlXWYWQMztnbz33nvvvffee++997o7nU4n99//P1xmZAFs9s5K2smeIYCqyB8/fnwfPyK+9+3vf3myRf/e2TrZOinv4P/0v5dbn315Z8t8g3/w/87f/w8IyiZTPAAAAA==
CB033293A504AA90602AC75F8D27CED4	1	cxsmiles	JChemExcelYQAAAB+LCAAAAAAABADtvQdgHEmWJSYvbcp7f0r1StfgdKEIgGATJNiQQBDswYjN5pLsHWlHIymrKoHKZVZlXWYWQMztnbz33nvvvffee++997o7nU4n99//P1xmZAFs9s5K2smeIYCqyB8/fnwfPyK+9+3vv9iif+5Md6fyU//Vn7v49/XWZ1/ewf9N06X9fmu5e+eEf+V/8P/wz/8HwqBuJGEAAAA=
9B4FFF6BBA76837DD601F15C0EBB9590	1	cxsmiles	JChemExcelqwAAAB+LCAAAAAAABADtvQdgHEmWJSYvbcp7f0r1StfgdKEIgGATJNiQQBDswYjN5pLsHWlHIymrKoHKZVZlXWYWQMztnbz33nvvvffee++997o7nU4n99//P1xmZAFs9s5K2smeIYCqyB8/fnwfPyK+9+3vfzndnW7RzzvBv3vT3ZOtz768c7LLf8vv97a+dH/w51v8+wv+vfvViy39xX0Z/nlPQdtPTWd7ph+//f8Dhvypw6sAAAA=
D56982834E6759EE239862A2DE03051E	1	cxsmiles	JChemExcelgwAAAB+LCAAAAAAABADtvQdgHEmWJSYvbcp7f0r1StfgdKEIgGATJNiQQBDswYjN5pLsHWlHIymrKoHKZVZlXWYWQMztnbz33nvvvffee++997o7nU4n99//P1xmZAFs9s5K2smeIYCqyB8/fnwfPyK+9+3vf3myRf/e4X+mu1P5uTfdesG/6Zdem6HPvU8jf57s2U+1i90XW599eeezL/8fdW55aoMAAAA=
BF763DF3D0138049768FB8F5234034F8	1	cxsmiles	JChemExcelXwEAAB+LCAAAAAAABADtvQdgHEmWJSYvbcp7f0r1StfgdKEIgGATJNiQQBDswYjN5pLsHWlHIymrKoHKZVZlXWYWQMztnbz33nvvvffee++997o7nU4n99//P1xmZAFs9s5K2smeIYCqyB8/fnwfPyK+9+3vf/l667Mv7+D/093pFn1wZ7o13ZtuveDfT/iLe+YL/Tr4cj/8Uv71Gsiv0/uxZtP7g82ChvdP+Cf/cwPg6addCNP7n96xg/wSn236a7rP/96TboJeOx3tTXdvAPb/ALn5os1fAQAA
BF47EFC8F2DDD0CC1CE8FD5B9C3F8695	1	cxsmiles	JChemExcelggAAAB+LCAAAAAAABADtvQdgHEmWJSYvbcp7f0r1StfgdKEIgGATJNiQQBDswYjN5pLsHWlHIymrKoHKZVZlXWYWQMztnbz33nvvvffee++997o7nU4n99//P1xmZAFs9s5K2smeIYCqyB8/fnwfPyK+9+3vv9g62frsyztfTnenW/TnHf13D5/jN/4H/z+5x7/2P3d/+r/e25ruTXc7n/b//H8AxrjYkoIAAAA=
B966DD649ACD1AF7B97CF978687DF012	1	cxsmiles	JChemExcelwgAAAB+LCAAAAAAABADtvQdgHEmWJSYvbcp7f0r1StfgdKEIgGATJNiQQBDswYjN5pLsHWlHIymrKoHKZVZlXWYWQMztnbz33nvvvffee++997o7nU4n99//P1xmZAFs9s5K2smeIYCqyB8/fnwfPyK+9+3vv9g92frsyzsvtqZ70y36+07k3929Oye7/OsJ/9v99cVW/PP+r91Onpnf9uTfTd/60ASb7337+/8PEBYOmcIAAAA=
524508EE0F78F8C1224B8D9FF2D3C029	1	cxsmiles	JChemExceljwAAAB+LCAAAAAAABADtvQdgHEmWJSYvbcp7f0r1StfgdKEIgGATJNiQQBDswYjN5pLsHWlHIymrKoHKZVZlXWYWQMztnbz33nvvvffee++997o7nU4n99//P1xmZAFs9s5K2smeIYCqyB8/fnwfPyK+9+3vT3enW/Tjjv67N92a7uK3F1udb/x/d0/4J/9zssc/+Ffv0+ivL7a8Pzrffe/b3/9/AHcIUl6PAAAA
5A7F060BE5E8A2FA704875194293EC56	1	cxsmiles	JChemExceldgAAAB+LCAAAAAAABADtvQdgHEmWJSYvbcp7f0r1StfgdKEIgGATJNiQQBDswYjN5pLsHWlHIymrKoHKZVZlXWYWQMztnbz33nvvvffee++997o7nU4n99//P1xmZAFs9s5K2smeIYCqyB8/fnwfPyK+9+3vv9g62aIfd/gf/N/7s//rl9PdKf9m/tWfu9Lm2R3637M73Ubev2j4/wDH8RI0dgAAAA==
53DB05DABBED1FB010E6B0ADA0AE0B65	1	cxsmiles	JChemExcellwAAAB+LCAAAAAAABADtvQdgHEmWJSYvbcp7f0r1StfgdKEIgGATJNiQQBDswYjN5pLsHWlHIymrKoHKZVZlXWYWQMztnbz33nvvvffee++997o7nU4n99//P1xmZAFs9s5K2smeIYCqyB8/fnwfPyK+9+3vf3myRf/e2ZruTvkX+Xc53fP/nG6ZZvjH+3x3787JLv/6Ys9r0f9VW/mf8I/PTtzne+bX/wexmNoDlwAAAA==
B083BBF7191D6215CB86F774EAC28E11	1	cxsmiles	JChemExcelmgAAAB+LCAAAAAAABADtvQdgHEmWJSYvbcp7f0r1StfgdKEIgGATJNiQQBDswYjN5pLsHWlHIymrKoHKZVZlXWYWQMztnbz33nvvvffee++997o7nU4n99//P1xmZAFs9s5K2smeIYCqyB8/fnwfPyK+9+3vf3my9dmXd0626Nc7/E//1xf6B7Wb7k75D/Ov/tzFvy+2vFc7kKa7y+nedGuJ/+0tTXvT0P3GnXz5vW9///8B0cNWdZoAAAA=
300B645CE9CC252DEF925E2FEB3CC31B	1	cxsmiles	JChemExcelCAEAAB+LCAAAAAAABADtvQdgHEmWJSYvbcp7f0r1StfgdKEIgGATJNiQQBDswYjN5pLsHWlHIymrKoHKZVZlXWYWQMztnbz33nvvvffee++997o7nU4n99//P1xmZAFs9s5K2smeIYCqyB8/fnwfPyK+9+3vv9g62frsyzv8z4st+oB+xb/dX7/34pPvb3l/T3en8rP/7+5Jecdv6kMZhv9z2fP/A9FGWnYIAQAA
CBEA158E5A70F460A4375DCE01D7584F	1	cxsmiles	JChemExcelhwAAAB+LCAAAAAAABADtvQdgHEmWJSYvbcp7f0r1StfgdKEIgGATJNiQQBDswYjN5pLsHWlHIymrKoHKZVZlXWYWQMztnbz33nvvvffee++997o7nU4n99//P1xmZAFs9s5K2smeIYCqyB8/fnwfPyK+9+3vv9ia7k63Tso70y36i/6d7i3Nr96/u3t3Tvg3/gf/9/70fn2xFf98+I3vffv7/w8cfvdVhwAAAA==
B92A6CE2D4E04254D4E65ADD27E31224	1	cxsmiles	JChemExceldgAAAB+LCAAAAAAABADtvQdgHEmWJSYvbcp7f0r1StfgdKEIgGATJNiQQBDswYjN5pLsHWlHIymrKoHKZVZlXWYWQMztnbz33nvvvffee++997o7nU4n99//P1xmZAFs9s5K2smeIYCqyB8/fnwfPyK+9+3vn2zRP3f4H+/XF1snW5+9vvP6Nf/AX7FWnT9v+83/A5l25Ap2AAAA
C86EE4F6EC237B57358E26AF7916D4BB	1	cxsmiles	JChemExcelPAAAAB+LCAAAAAAABADtvQdgHEmWJSYvbcp7f0r1StfgdKEIgGATJNiQQBDswYjN5pLsHWlHIymrKoHKZVZlXWYWQMztnbz33nvvvffee++997o7nU4n99//P1xmZAFs9s5K2smeIYCqyB8/fnwfPyK+9+3vT3enW/Tjjv67d7L12Zd3pveCD/1/772e7k13v/ft7/8/+Ro+bDwAAAA=
CFB9D6F135971E1EC3EE5B97B87F8C7F	1	cxsmiles	JChemExcellwAAAB+LCAAAAAAABADtvQdgHEmWJSYvbcp7f0r1StfgdKEIgGATJNiQQBDswYjN5pLsHWlHIymrKoHKZVZlXWYWQMztnbz33nvvvffee++997o7nU4n99//P1xmZAFs9s5K2smeIYCqyB8/fnwfPyK+9+3vv9ia7k636Jc75t/p3uvpvfAj7997J1uffXlnurt354Q/4H/wf+9P79cXW/HPh9/43re///8ARflZrpcAAAA=
22871C7A376D65F9B2EC5FED5BEA9627	1	cxsmiles	JChemExcelmAAAAB+LCAAAAAAABADtvQdgHEmWJSYvbcp7f0r1StfgdKEIgGATJNiQQBDswYjN5pLsHWlHIymrKoHKZVZlXWYWQMztnbz33nvvvffee++997o7nU4n99//P1xmZAFs9s5K2smeIYCqyB8/fnwfPyK+9+3vf3myRf/e4X+mu1P5qf++4J9eA+/XF1vxz4ffYJh7J1uffXlnei/syPv33uvp7t7/A6+cIZyYAAAA
8D277138685E9E9C1408739426AACE78	1	cxsmiles	JChemExcelPgAAAB+LCAAAAAAABADtvQdgHEmWJSYvbcp7f0r1StfgdKEIgGATJNiQQBDswYjN5pLsHWlHIymrKoHKZVZlXWYWQMztnbz33nvvvffee++997o7nU4n99//P1xmZAFs9s5K2smeIYCqyB8/fnwfPyK+9+3vT3eX073ldIt+vUM/Xk/vTbfMn/dO+Cf/g/+/2Prsyzv0P3ph93vf/v7/AwpVrfM+AAAA
88F8E9979F9F0F33A7316791254D16B7	1	cxsmiles	JChemExcelegAAAB+LCAAAAAAABADtvQdgHEmWJSYvbcp7f0r1StfgdKEIgGATJNiQQBDswYjN5pLsHWlHIymrKoHKZVZlXWYWQMztnbz33nvvvffee++997o7nU4n99//P1xmZAFs9s5K2smeIYCqyB8/fnwfPyK+9+3vv9ia7k636Jc75t/p1kl5Z7qLP074I/6n86f364ut+OfDb3zv29//fwBhbkA2egAAAA==
C253DEC8E3909B9C6680F60C0A99AF01	1	cxsmiles	JChemExcelXAAAAB+LCAAAAAAABADtvQdgHEmWJSYvbcp7f0r1StfgdKEIgGATJNiQQBDswYjN5pLsHWlHIymrKoHKZVZlXWYWQMztnbz33nvvvffee++997o7nU4n99//P1xmZAFs9s5K2smeIYCqyB8/fnwfPyK+9+3vv9g92aIfd/gf79cXW9O9Kf9m/p1unZR3pnuddp0/T3bNp/8Pwf0aolwAAAA=
71DEC7D3155AC3E744F209ABB3E2694E	1	cxsmiles	JChemExcelcwAAAB+LCAAAAAAABADtvQdgHEmWJSYvbcp7f0r1StfgdKEIgGATJNiQQBDswYjN5pLsHWlHIymrKoHKZVZlXWYWQMztnbz33nvvvffee++997o7nU4n99//P1xmZAFs9s5K2smeIYCqyB8/fnwfPyK+9+3vT3enW/TjznTry5Otz76882LrhP/mf/D/zp+m9XSXP3nxyfe7L2wG8P8AaI69mnMAAAA=
D31F66B3817C5755B7A898EF3EFA464A	1	cxsmiles	JChemExcelMQAAAB+LCAAAAAAABADtvQdgHEmWJSYvbcp7f0r1StfgdKEIgGATJNiQQBDswYjN5pLsHWlHIymrKoHKZVZlXWYWQMztnbz33nvvvffee++997o7nU4n99//P1xmZAFs9s5K2smeIYCqyB8/fnwfPyK+9+3vT3eX0y36eWe6tZzu4peT3c9Otk62Pnt95/Xr3Tsn/CX/871vf///AW3VS58xAAAA
EF5899EEA379237F4554580D4D05DF74	1	cxsmiles	JChemExcelUgAAAB+LCAAAAAAABADtvQdgHEmWJSYvbcp7f0r1StfgdKEIgGATJNiQQBDswYjN5pLsHWlHIymrKoHKZVZlXWYWQMztnbz33nvvvffee++997o7nU4n99//P1xmZAFs9s5K2smeIYCqyB8/fnwfPyK+9+3vv9g92aIfdz472TrZ++zFydZn8jf98vrOi929O/In/4P/T3en/Hvk393vffv7/w+0DBgUUgAAAA==
F16FD3AAAAB22720B6D42D7F6B3F8886	1	cxsmiles	JChemExcelYwAAAB+LCAAAAAAABADtvQdgHEmWJSYvbcp7f0r1StfgdKEIgGATJNiQQBDswYjN5pLsHWlHIymrKoHKZVZlXWYWQMztnbz33nvvvffee++997o7nU4n99//P1xmZAFs9s5K2smeIYCqyB8/fnwfPyK+9+3vv9g92aIfdz472TrZ++zFydZn8jf98uWdF7t7d6a7U/4g8u+u/Lvx+/8HYIb8vmMAAAA=
187A914A490EEB5A00B4E61CEF74DA64	1	cxsmiles	JChemExcelZQAAAB+LCAAAAAAABADtvQdgHEmWJSYvbcp7f0r1StfgdKEIgGATJNiQQBDswYjN5pLsHWlHIymrKoHKZVZlXWYWQMztnbz33nvvvffee++997o7nU4n99//P1xmZAFs9s5K2smeIYCqyB8/fnwfPyK+9+3vT3enW8vl3nT3xdbJFv195zP5cbL32es78qv8Hf0V/98GCPwS+Xf3e9/+/v8D2S0eQWUAAAA=
CEA5998F4D7E2CB74591D921C873865F	1	cxsmiles	JChemExcelRwAAAB+LCAAAAAAABADtvQdgHEmWJSYvbcp7f0r1StfgdKEIgGATJNiQQBDswYjN5pLsHWlHIymrKoHKZVZlXWYWQMztnbz33nvvvffee++997o7nU4n99//P1xmZAFs9s5K2smeIYCqyB8/fnwfPyK+9+3vv9g92aIfdz472TrZ++yF/QM/TrY+e33nxe7enenulD+I/Lv7vW9///8BuuMSc0cAAAA=
0D919F7511896A8569149177F5DB1FF7	1	cxsmiles	JChemExcelUAAAAB+LCAAAAAAABADtvQdgHEmWJSYvbcp7f0r1StfgdKEIgGATJNiQQBDswYjN5pLsHWlHIymrKoHKZVZlXWYWQMztnbz33nvvvffee++997o7nU4n99//P1xmZAFs9s5K2smeIYCqyB8/fnwfPyK+9+3vv9h9sXey9dkL+v/JFv1952Tvs9d35Ff+hz/j3z472Z3uTvnXyL+73/v29/8fW7ap1FAAAAA=
57E923E50F5792982657405DED68DDC5	1	cxsmiles	JChemExcelRQAAAB+LCAAAAAAABADtvQdgHEmWJSYvbcp7f0r1StfgdKEIgGATJNiQQBDswYjN5pLsHWlHIymrKoHKZVZlXWYWQMztnbz33nvvvffee++997o7nU4n99//P1xmZAFs9s5K2smeIYCqyB8/fnwfPyK+9+3vv9h9sXey9dmLky36485n8uNk77PXd8wnu9PdKf8a+Xf3e9/+/v8DN9pB2kUAAAA=
80F21A7EA7061E58B667C65949A63AE7	1	cxsmiles	JChemExcelRwAAAB+LCAAAAAAABADtvQdgHEmWJSYvbcp7f0r1StfgdKEIgGATJNiQQBDswYjN5pLsHWlHIymrKoHKZVZlXWYWQMztnbz33nvvvffee++997o7nU4n99//P1xmZAFs9s5K2smeIYCqyB8/fnwfPyK+9+3vv9g92aIfdz6THyd7n7042TJ/bH32+s6L3b07090pfxD5d/d73/7+/wO21giCRwAAAA==
08D0032E509CA0D7F67E27356C9F0509	1	cxsmiles	JChemExcelTwAAAB+LCAAAAAAABADtvQdgHEmWJSYvbcp7f0r1StfgdKEIgGATJNiQQBDswYjN5pLsHWlHIymrKoHKZVZlXWYWQMztnbz33nvvvffee++997o7nU4n99//P1xmZAFs9s5K2smeIYCqyB8/fnwfPyK+9+3vT3enW8vl3nT3xdbJFv195zP5cbL32es78iv/g/9vozF+ify7+71vf///AYz4nUdPAAAA
28155237AE58E698C4CF0F13FC45B975	1	cxsmiles	JChemExcelNgAAAB+LCAAAAAAABADtvQdgHEmWJSYvbcp7f0r1StfgdKEIgGATJNiQQBDswYjN5pLsHWlHIymrKoHKZVZlXWYWQMztnbz33nvvvffee++997o7nU4n99//P1xmZAFs9s5K2smeIYCqyB8/fnwfPyK+9+3vv9g92aIfdz6THyd7n7042TJ/bH32+s6L3b078if/871vf///AZuOLKw2AAAA
88B473075F306893E4B7DB2C6AB92C2F	1	cxsmiles	JChemExcelKwAAAB+LCAAAAAAABADtvQdgHEmWJSYvbcp7f0r1StfgdKEIgGATJNiQQBDswYjN5pLsHWlHIymrKoHKZVZlXWYWQMztnbz33nvvvffee++997o7nU4n99//P1xmZAFs9s5K2smeIYCqyB8/fnwfPyK+9+3vv9g92aIfdz6THyd7n70IP9j67PWdF7t7/w/gAyHhKwAAAA==
1FBD04819BB401B781C0032305C137E0	1	cxsmiles	JChemExcelbgAAAB+LCAAAAAAABADtvQdgHEmWJSYvbcp7f0r1StfgdKEIgGATJNiQQBDswYjN5pLsHWlHIymrKoHKZVZlXWYWQMztnbz33nvvvffee++997o7nU4n99//P1xmZAFs9s5K2smeIYCqyB8/fnwfPyK+9+3vv9g92aIfdz472TrZ++zFydZn8jf98uWdF7t7d6a7U/4g8u+u/Bv7Xr4TUPzP9779/f8HjGmiAG4AAAA=
AA808700A078BD9F329766B583E9BBF6	1	cxsmiles	JChemExcelUgAAAB+LCAAAAAAABADtvQdgHEmWJSYvbcp7f0r1StfgdKEIgGATJNiQQBDswYjN5pLsHWlHIymrKoHKZVZlXWYWQMztnbz33nvvvffee++997o7nU4n99//P1xmZAFs9s5K2smeIYCqyB8/fnwfPyK+9+3vv9g92aIfdz472TrZ+uzLO1/Kn/yP9yv/uffZC2pzot999vrOi929TqP/B0fmjThSAAAA
F30BE0E8239DE547A823A5F84828058E	1	cxsmiles	JChemExceldAAAAB+LCAAAAAAABADtvQdgHEmWJSYvbcp7f0r1StfgdKEIgGATJNiQQBDswYjN5pLsHWlHIymrKoHKZVZlXWYWQMztnbz33nvvvffee++997o7nU4n99//P1xmZAFs9s5K2smeIYCqyB8/fnwfPyK+9+3vv9h9sXey9dkL+v/JFv1952Tvs9d35Ff+hz/j3z472Z3uTvnX6daXnSa3+mT3e9/+/v8DmSeqAnQAAAA=
3B2D7D6327CF9CF2FFC2BAAC02672362	1	cxsmiles	JChemExcelYQAAAB+LCAAAAAAABADtvQdgHEmWJSYvbcp7f0r1StfgdKEIgGATJNiQQBDswYjN5pLsHWlHIymrKoHKZVZlXWYWQMztnbz33nvvvffee++997o7nU4n99//P1xmZAFs9s5K2smeIYCqyB8/fnwfPyK+9+3vv9h9sXey9dkL+v/JFv1952Tvs9d3pntT/iPy7x434t8/O9md7g423P3et7///wAjYnlYYQAAAA==
CA4C41A4FCD1478FB8E9604EC715CDA8	1	cxsmiles	JChemExcelngAAAB+LCAAAAAAABADtvQdgHEmWJSYvbcp7f0r1StfgdKEIgGATJNiQQBDswYjN5pLsHWlHIymrKoHKZVZlXWYWQMztnbz33nvvvffee++997o7nU4n99//P1xmZAFs9s5K2smeIYCqyB8/fnwfPyK+9+3vT3enW/Tjjv6792Jres98Enxz7/V0b7qLX0+2nt2h/z2jX/DnlnwW+/XF7sDnW94f3dd3zaf/DxCQu7OeAAAA
EE4C39E191ABE0E2C035D24C5EA895D8	1	cxsmiles	JChemExcelSgAAAB+LCAAAAAAABADtvQdgHEmWJSYvbcp7f0r1StfgdKEIgGATJNiQQBDswYjN5pLsHWlHIymrKoHKZVZlXWYWQMztnbz33nvvvffee++997o7nU4n99//P1xmZAFs9s5K2smeIYCqyB8/fnwfPyK+9+3vv9ia7k636Jc75t8Xn5189tr8tSv/hi38715sffblnc++/H8AEcrUQEoAAAA=
8B9439C990289D5B80C6D43F8862C1E1	1	cxsmiles	JChemExcelTAAAAB+LCAAAAAAABADtvQdgHEmWJSYvbcp7f0r1StfgdKEIgGATJNiQQBDswYjN5pLsHWlHIymrKoHKZVZlXWYWQMztnbz33nvvvffee++997o7nU4n99//P1xmZAFs9s5K2smeIYCqyB8/fnwfPyK+9+3vfzndnW7Rzzvm35PS/Lp7svXZl3de6B9hK9ukpAbU6rMv/x9m8NMWTAAAAA==
57E016623E85F50116B5F96DFB05F034	1	cxsmiles	JChemExcelmwAAAB+LCAAAAAAABADtvQdgHEmWJSYvbcp7f0r1StfgdKEIgGATJNiQQBDswYjN5pLsHWlHIymrKoHKZVZlXWYWQMztnbz33nvvvffee++997o7nU4n99//P1xmZAFs9s5K2smeIYCqyB8/fnwfPyK+9+3vf/l667Mv72x99vrOlydb9Pcd/kd/feH/4X3tfdr5dfib9/n1e9/+/v8DfQI8EZsAAAA=
3308F3FECFD095EFB1B0A3584B3CCB52	1	cxsmiles	JChemExcelkAAAAB+LCAAAAAAABADtvQdgHEmWJSYvbcp7f0r1StfgdKEIgGATJNiQQBDswYjN5pLsHWlHIymrKoHKZVZlXWYWQMztnbz33nvvvffee++997o7nU4n99//P1xmZAFs9s5K2smeIYCqyB8/fnwfPyK+9+3vf/l667Mv72x99vrOlydb9Pcd/kd/feH/4X3tfRr582v++r1vf///AR7Q7aSQAAAA
32F112074FCC70E161C7BB9887A4AB9A	1	cxsmiles	JChemExcelpgAAAB+LCAAAAAAABADtvQdgHEmWJSYvbcp7f0r1StfgdKEIgGATJNiQQBDswYjN5pLsHWlHIymrKoHKZVZlXWYWQMztnbz33nvvvffee++997o7nU4n99//P1xmZAFs9s5K2smeIYCqyB8/fnwfPyK+9+3vv9g62aIfd/gf79fOnz9nv37v29//fwBzID0OpgAAAA==
D5B9DDAA99C64315AFD030062DD87841	1	cxsmiles	JChemExceldQEAAB+LCAAAAAAABADtvQdgHEmWJSYvbcp7f0r1StfgdKEIgGATJNiQQBDswYjN5pLsHWlHIymrKoHKZVZlXWYWQMztnbz33nvvvffee++997o7nU4n99//P1xmZAFs9s5K2smeIYCqyB8/fnwfPyK+9+3vf3myu3Wy9dmXd7482aI/7/A/+P/JHv/6Ymt6b8q/Tbe6TaZb+s29k7097zvv1xf3ep9/dqJ/xN/gX0727vHHu/zRl4xgF78BvKd7S0XKoN379950CNvI58EnX/Y/CpHac7/uul+DRv8PeFYu0nUBAAA=
DADCDA01864C5FAC2871C281C76CE8AC	1	cxsmiles	JChemExcelsQAAAB+LCAAAAAAABADtvQdgHEmWJSYvbcp7f0r1StfgdKEIgGATJNiQQBDswYjN5pLsHWlHIymrKoHKZVZlXWYWQMztnbz33nvvvffee++997o7nU4n99//P1xmZAFs9s5K2smeIYCqyB8/fnwfPyK+9+3vf3my9dmXd0626Nc7/E/wK3315cku//HlyZ7+vLf1Jf2xpw2HXu1+yZ/u9drdc1/udr/s//n/AECCcNSxAAAA
A8820CC50EBC038CA1971FDF64F73CBF	1	cxsmiles	JChemExcelTQAAAB+LCAAAAAAABADtvQdgHEmWJSYvbcp7f0r1StfgdKEIgGATJNiQQBDswYjN5pLsHWlHIymrKoHKZVZlXWYWQMztnbz33nvvvffee++997o7nU4n99//P1xmZAFs9s5K2smeIYCqyB8/fnwfPyK+9+3vT3enW/TjjvlXf+7i35Nd/uPFZyd7r0/4V/7H+/XFnrb53re///8AOV4e/U0AAAA=
E91870B436CEF7C04ACC389D645DEDCB	1	cxsmiles	JChemExcelUwAAAB+LCAAAAAAABADtvQdgHEmWJSYvbcp7f0r1StfgdKEIgGATJNiQQBDswYjN5pLsHWlHIymrKoHKZVZlXWYWQMztnbz33nvvvffee++997o7nU4n99//P1xmZAFs9s5K2smeIYCqyB8/fnwfPyK+9+3vT3enW8vp3nSLfr/T/3e5u3fnhH/jf15Pd5ebW/8/ITM7HVMAAAA=
C4689CFE9216125EE265A90EF583FC36	1	cxsmiles	JChemExcelQAAAAB+LCAAAAAAABADtvQdgHEmWJSYvbcp7f0r1StfgdKEIgGATJNiQQBDswYjN5pLsHWlHIymrKoHKZVZlXWYWQMztnbz33nvvvffee++997o7nU4n99//P1xmZAFs9s5K2smeIYCqyB8/fnwfPyK+9+3vT3enW/Tjjv67N92a7np/y7+7y+V06/UJ/8H/nPz4izvLvd3/B7xoZMtAAAAA
D0096F2A0B00FEA5354449192A0A6C2B	1	cxsmiles	JChemExcelRgAAAB+LCAAAAAAABADtvQdgHEmWJSYvbcp7f0r1StfgdKEIgGATJNiQQBDswYjN5pLsHWlHIymrKoHKZVZlXWYWQMztnbz33nvvvffee++997o7nU4n99//P1xmZAFs9s5K2smeIYCqyB8/fnwfPyK+9+3vT3eb6d5yujXdoj/uLPemu/h5wn/xP6+nu8vldE++7/+73N37fwDPqWypRgAAAA==
486AC2CBE5EF630634BCA04011B00277	1	cxsmiles	JChemExcelXAAAAB+LCAAAAAAABADtvQdgHEmWJSYvbcp7f0r1StfgdKEIgGATJNiQQBDswYjN5pLsHWlHIymrKoHKZVZlXWYWQMztnbz33nvvvffee++997o7nU4n99//P1xmZAFs9s5K2smeIYCqyB8/fnwfPyK+9+3vT3enW8vp3nK6RX/c8f9d7u7dOeHf+J/X092lbbXcvbONN7vv6L+73/v29/8fAOVgUlwAAAA=
FE3405639433BA8603C66CD2EB86283E	1	cxsmiles	JChemExcelYgAAAB+LCAAAAAAABADtvQdgHEmWJSYvbcp7f0r1StfgdKEIgGATJNiQQBDswYjN5pLsHWlHIymrKoHKZVZlXWYWQMztnbz33nvvvffee++997o7nU4n99//P1xmZAFs9s5K2smeIYCqyB8/fnwfPyK+9+3vT3enW/TjjvlXf+7i3xP+nf9Z7k73ltOt195H/PFyukf/BRC8f3f3/h+BaNHOYgAAAA==
473CD6BDF0934C61F2DD9DF70FA1B2B4	1	cxsmiles	JChemExcelUgAAAB+LCAAAAAAABADtvQdgHEmWJSYvbcp7f0r1StfgdKEIgGATJNiQQBDswYjN5pLsHWlHIymrKoHKZVZlXWYWQMztnbz33nvvvffee++997o7nU4n99//P1xmZAFs9s5K2smeIYCqyB8/fnwfPyK+9+3vT3eX0y36ecf8O93Fz236fDndm94Lv/T+pW+Wy929Oyf8J//zvW9///8BSes9NFIAAAA=
98EF826BB1ABADE5B18CE88D2860C7B5	1	cxsmiles	JChemExcelSgAAAB+LCAAAAAAABADtvQdgHEmWJSYvbcp7f0r1StfgdKEIgGATJNiQQBDswYjN5pLsHWlHIymrKoHKZVZlXWYWQMztnbz33nvvvffee++997o7nU4n99//P1xmZAFs9s5K2smeIYCqyB8/fnwfPyK+9+3vT3eXy73p1nSLfr8z3VpO96a7Jz/+4s4Jf8D/4P/b013TpPfv7ve+/f3/B6JYEghKAAAA
DF89C10A78A25E69AAAB9DD04ADF5C0D	1	cxsmiles	JChemExcelVwAAAB+LCAAAAAAABADtvQdgHEmWJSYvbcp7f0r1StfgdKEIgGATJNiQQBDswYjN5pLsHWlHIymrKoHKZVZlXWYWQMztnbz33nvvvffee++997o7nU4n99//P1xmZAFs9s5K2smeIYCqyB8/fnwfPyK+9+3vT3enW/TjjvlXf+7i3+3p7nI53ZveC5t4/9I3y+Xu3p0T/pP/+d63v///ALtUsEpXAAAA
E5D7424C909F08F0E0B455E078A73FE9	1	cxsmiles	JChemExcelbgAAAB+LCAAAAAAABADtvQdgHEmWJSYvbcp7f0r1StfgdKEIgGATJNiQQBDswYjN5pLsHWlHIymrKoHKZVZlXWYWQMztnbz33nvvvffee++997o7nU4n99//P1xmZAFs9s5K2smeIYCqyB8/fnwfPyK+9+3vT3eXy63p3nK6RX/coR+vT/g3/md6Tz42/578+Avz+z3+d3fvjt98N2zu/bv7vW9///8BuUiMQm4AAAA=
3F1547E33CA4EEE5AF07987FF66BDAEE	1	cxsmiles	JChemExcelYwAAAB+LCAAAAAAABADtvQdgHEmWJSYvbcp7f0r1StfgdKEIgGATJNiQQBDswYjN5pLsHWlHIymrKoHKZVZlXWYWQMztnbz33nvvvffee++997o7nU4n99//P1xmZAFs9s5K2smeIYCqyB8/fnwfPyK+9+3vT3enW/TjjvlXf+7i3218uVzuTbden/DH/M/Jj7+wrZfT3b073nf8ffDn/wM4CPlgYwAAAA==
85E47F531C0200CC4F334A3C99A30B3F	1	cxsmiles	JChemExcelTwAAAB+LCAAAAAAABADtvQdgHEmWJSYvbcp7f0r1StfgdKEIgGATJNiQQBDswYjN5pLsHWlHIymrKoHKZVZlXWYWQMztnbz33nvvvffee++997o7nU4n99//P1xmZAFs9s5K2smeIYCqyB8/fnwfPyK+9+3vT3enW/Tjjv67N91aTu9N94MP/X/pm+Vy796dE/6T/+HPd7/37e//P2Dw1yVPAAAA
ABFFCF3B9181332E4685E67674695856	1	cxsmiles	JChemExcelVwAAAB+LCAAAAAAABADtvQdgHEmWJSYvbcp7f0r1StfgdKEIgGATJNiQQBDswYjN5pLsHWlHIymrKoHKZVZlXWYWQMztnbz33nvvvffee++997o7nU4n99//P1xmZAFs9s5K2smeIYCqyB8/fnwfPyK+9+3vT3eXy+ne9N50i/64E/47vbecbm3Hv+N/7+Hf5e7enRP+m//53re///8AN30+M1cAAAA=
1C1B1E674922420C836B052B6EDE63AC	1	cxsmiles	JChemExcelTAAAAB+LCAAAAAAABADtvQdgHEmWJSYvbcp7f0r1StfgdKEIgGATJNiQQBDswYjN5pLsHWlHIymrKoHKZVZlXWYWQMztnbz33nvvvffee++997o7nU4n99//P1xmZAFs9s5K2smeIYCqyB8/fnwfPyK+9+3vT3eXy+ne9N50i/64E/n33nK6tb3pe/y73N37fwAguUD6TAAAAA==
0B301F91486D1D6DFBA13F4917CC7D1B	1	cxsmiles	JChemExcelVwAAAB+LCAAAAAAABADtvQdgHEmWJSYvbcp7f0r1StfgdKEIgGATJNiQQBDswYjN5pLsHWlHIymrKoHKZVZlXWYWQMztnbz33nvvvffee++997o7nU4n99//P1xmZAFs9s5K2smeIYCqyB8/fnwfPyK+9+3vT3enW/TjjvlXf+7i3+3p7nK5N91aLqd79F/Qzvt3d+/OCf/G/3zv29//fwCkPwoDVwAAAA==
2BC968B1FEF56D187542ACE31DCF1C4D	1	cxsmiles	JChemExcelbQAAAB+LCAAAAAAABADtvQdgHEmWJSYvbcp7f0r1StfgdKEIgGATJNiQQBDswYjN5pLsHWlHIymrKoHKZVZlXWYWQMztnbz33nvvvffee++997o7nU4n99//P1xmZAFs9s5K2smeIYCqyB8/fnwfPyK+9+3vT3enW/TjjvlXf+7i3xP+nf9Z7k73ltOt195H/PFyukf/he8qhD3//e99+/v/D0QK5CBtAAAA
8A94003FE9A294271AA9E65B7FFF0AA5	1	cxsmiles	JChemExcelTwAAAB+LCAAAAAAABADtvQdgHEmWJSYvbcp7f0r1StfgdKEIgGATJNiQQBDswYjN5pLsHWlHIymrKoHKZVZlXWYWQMztnbz33nvvvffee++997o7nU4n99//P1xmZAFs9s5K2smeIYCqyB8/fnwfPyK+9+3vT3enW/TjznRrureU3+4tp1uvT/h3/sf7Ff9fLqf3pnvT3f5X/w+pBzEsTwAAAA==
8C92D302414B1C657B9F1EE92472BF67	1	cxsmiles	JChemExcelYgAAAB+LCAAAAAAABADtvQdgHEmWJSYvbcp7f0r1StfgdKEIgGATJNiQQBDswYjN5pLsHWlHIymrKoHKZVZlXWYWQMztnbz33nvvvffee++997o7nU4n99//P1xmZAFs9s5K2smeIYCqyB8/fnwfPyK+9+3vf3my9dmXd0626Nc7W6+nu8vl3nRruZzSv/houot/t6e7+qf+63+p7+Kf/p//D9hCv7ZiAAAA
5B80D3D54CEE4C47650F0932A83CDDD1	1	cxsmiles	JChemExcelbwAAAB+LCAAAAAAABADtvQdgHEmWJSYvbcp7f0r1StfgdKEIgGATJNiQQBDswYjN5pLsHWlHIymrKoHKZVZlXWYWQMztnbz33nvvvffee++997o7nU4n99//P1xmZAFs9s5K2smeIYCqyB8/fnwfPyK+9+3vT3enW/TjjvlXf+7i3xP+nf95Pd1dLqd7063l7p3lVvcl79+9Xf8179fvffv7/w/ACKVMbwAAAA==
A7D38EF4A14570D4BB9E3144BA4FB291	1	cxsmiles	JChemExcelWQAAAB+LCAAAAAAABADtvQdgHEmWJSYvbcp7f0r1StfgdKEIgGATJNiQQBDswYjN5pLsHWlHIymrKoHKZVZlXWYWQMztnbz33nvvvffee++997o7nU4n99//P1xmZAFs9s5K2smeIYCqyB8/fnwfPyK+9+3vT3eb6dZyunuyRX/c4X9eT3eXy+kefY6/plvb03vm196/9/Dvcnfvjvf+9779/f8Hy8PTGFkAAAA=
BE8621E74298EA4528D2E013E703F930	1	cxsmiles	JChemExcelUQAAAB+LCAAAAAAABADtvQdgHEmWJSYvbcp7f0r1StfgdKEIgGATJNiQQBDswYjN5pLsHWlHIymrKoHKZVZlXWYWQMztnbz33nvvvffee++997o7nU4n99//P1xmZAFs9s5K2smeIYCqyB8/fnwfPyK+9+3vT3enW/TjznTL/OR/d5/d2Z7uLpfTveDjrdcn/Av/4/2K/y+Xu3v/D6F4nTBRAAAA
ED4EADC63A869ED1A3594D260756F928	1	cxsmiles	JChemExcelUQAAAB+LCAAAAAAABADtvQdgHEmWJSYvbcp7f0r1StfgdKEIgGATJNiQQBDswYjN5pLsHWlHIymrKoHKZVZlXWYWQMztnbz33nvvvffee++997o7nU4n99//P1xmZAFs9s5K2smeIYCqyB8/fnwfPyK+9+3vT3enW/TjznTr2R3z23QXP7enu8vldM98KP++PuFf+B/vV/x/udzd+38AUjQvo1EAAAA=
F3A79D12013EB7EE0A638F8815032CA5	1	cxsmiles	JChemExcelSgAAAB+LCAAAAAAABADtvQdgHEmWJSYvbcp7f0r1StfgdKEIgGATJNiQQBDswYjN5pLsHWlHIymrKoHKZVZlXWYWQMztnbz33nvvvffee++997o7nU4n99//P1xmZAFs9s5K2smeIYCqyB8/fnwfPyK+9+3vT3enW/Tjjv67N91aLu9Nt8yHy+nevTsn/Af/g/93/pzufu/b3/9/AL86O8FKAAAA
6BEFD58613440C4D85575A29B9BF155F	1	cxsmiles	JChemExcelRwAAAB+LCAAAAAAABADtvQdgHEmWJSYvbcp7f0r1StfgdKEIgGATJNiQQBDswYjN5pLsHWlHIymrKoHKZVZlXWYWQMztnbz33nvvvffee++997o7nU4n99//P1xmZAFs9s5K2smeIYCqyB8/fnwfPyK+9+3vT3enW/TjjvlXf+7i3+3p7nK5t1wup3v0X9DM+3d37/8BFHvM4kcAAAA=
482A689C69A636358FF24C67C94FB0EC	1	cxsmiles	JChemExcelbwAAAB+LCAAAAAAABADtvQdgHEmWJSYvbcp7f0r1StfgdKEIgGATJNiQQBDswYjN5pLsHWlHIymrKoHKZVZlXWYWQMztnbz33nvvvffee++997o7nU4n99//P1xmZAFs9s5K2smeIYCqyB8/fnwfPyK+9+3vT3enW/TjjvlXf+7i3+3p7nK6F37v/UvfuHZL+mtJrZvdOyf8Nf/j/fq9b3///wFknfaXbwAAAA==
CBA532AA85CF326DC92D64F4EBFD8D93	1	cxsmiles	JChemExcelUgAAAB+LCAAAAAAABADtvQdgHEmWJSYvbcp7f0r1StfgdKEIgGATJNiQQBDswYjN5pLsHWlHIymrKoHKZVZlXWYWQMztnbz33nvvvffee++997o7nU4n99//P1xmZAFs9s5K2smeIYCqyB8/fnwfPyK+9+3vT3enW/TjjvlXf+7i3+3p7nK6Zz/z/92b7i3p2d27c8If8D/f+/b3/x/C5auEUgAAAA==
9021AE06316BEB6B029AE0C5C88D46F8	1	cxsmiles	JChemExcelUgAAAB+LCAAAAAAABADtvQdgHEmWJSYvbcp7f0r1StfgdKEIgGATJNiQQBDswYjN5pLsHWlHIymrKoHKZVZlXWYWQMztnbz33nvvvffee++997o7nU4n99//P1xmZAFs9s5K2smeIYCqyB8/fnwfPyK+9+3vT3enW/Tjjv67N91aTre2p/eCT7f05z38e8K/8z/y4ZKevXt3prvf+/b3/x9rvP5NUgAAAA==
F3C343B156B90E0323949A5E44406F3E	1	cxsmiles	JChemExcelQgAAAB+LCAAAAAAABADtvQdgHEmWJSYvbcp7f0r1StfgdKEIgGATJNiQQBDswYjN5pLsHWlHIymrKoHKZVZlXWYWQMztnbz33nvvvffee++997o7nU4n99//P1xmZAFs9s5K2smeIYCqyB8/fnwfPyK+9+3vT3eX0y36ecf8O93Fz218vhd+4/27N91b0rO79/8Ay54sm0IAAAA=
8C4D29CAEC61C237F179E6527BFAAE02	1	cxsmiles	JChemExcelZAAAAB+LCAAAAAAABADtvQdgHEmWJSYvbcp7f0r1StfgdKEIgGATJNiQQBDswYjN5pLsHWlHIymrKoHKZVZlXWYWQMztnbz33nvvvffee++997o7nU4n99//P1xmZAFs9s5K2smeIYCqyB8/fnwfPyK+9+3vT3er6d50a3rvy5Otz768M92fbtGnd6Zb9Dd+4X/kE+/f/e3pPf11b7rbaRn++f8AuLYrH2QAAAA=
E8636167EC4A902284A8333CE13A213B	1	cxsmiles	JChemExcelbwAAAB+LCAAAAAAABADtvQdgHEmWJSYvbcp7f0r1StfgdKEIgGATJNiQQBDswYjN5pLsHWlHIymrKoHKZVZlXWYWQMztnbz33nvvvffee++997o7nU4n99//P1xmZAFs9s5K2smeIYCqyB8/fnwfPyK+9+3vf3my9dmXd052t76c7k238N+X9Okd+mXvZAu/8T/0PX7wr+7T9/3z/wHdbQVebwAAAA==
A224B00A79723AAC9F266CA81C5482C3	1	cxsmiles	JChemExcelUAAAAB+LCAAAAAAABADtvQdgHEmWJSYvbcp7f0r1StfgdKEIgGATJNiQQBDswYjN5pLsHWlHIymrKoHKZVZlXWYWQMztnbz33nvvvffee++997o7nU4n99//P1xmZAFs9s5K2smeIYCqyB8/fnwfPyK+9+3vT3enW/Tjjv67N723pOfecrq1Pb0XfLWlP+/h3xP+nf/R93a/9+3v/z/oLbixUAAAAA==
9C1DAAB85AC486D26F42C7E2E20CA34A	1	cxsmiles	JChemExceldQAAAB+LCAAAAAAABADtvQdgHEmWJSYvbcp7f0r1StfgdKEIgGATJNiQQBDswYjN5pLsHWlHIymrKoHKZVZlXWYWQMztnbz33nvvvffee++997o7nU4n99//P1xmZAFs9s5K2smeIYCqyB8/fnwfPyK+9+3vT3enW1+ebNFvd7ZOtj778o7+jn/w/86f0z1qdCItv5zuTfmL6e7ml8I//x9I+9DSdQAAAA==
C8995B4C07FB40BEFC1902EABE207FFF	1	cxsmiles	JChemExcelXwAAAB+LCAAAAAAABADtvQdgHEmWJSYvbcp7f0r1StfgdKEIgGATJNiQQBDswYjN5pLsHWlHIymrKoHKZVZlXWYWQMztnbz33nvvvffee++997o7nU4n99//P1xmZAFs9s5K2smeIYCqyB8/fnwfPyK+9+3vf3myRf/e2ZruVtO9Kf+u/9472fpMvqRfvrzz5fQeNdjV5vhHvtrw5/8DOz2+2V8AAAA=
7EE1A51AEA0FEEAF5A7E43B9C0A7CE4B	1	cxsmiles	JChemExcelPwAAAB+LCAAAAAAABADtvQdgHEmWJSYvbcp7f0r1StfgdKEIgGATJNiQQBDswYjN5pLsHWlHIymrKoHKZVZlXWYWQMztnbz33nvvvffee++997o7nU4n99//P1xmZAFs9s5K2smeIYCqyB8/fnwfPyK+9+3vT3enW/Tjjv67N92a7np/y7+7y+V0a7m3e+eE/+Z/vvft7/8/UtEelj8AAAA=
A18E5195837537E2418A3CD1ED843D13	1	cxsmiles	JChemExceljQAAAB+LCAAAAAAABADtvQdgHEmWJSYvbcp7f0r1StfgdKEIgGATJNiQQBDswYjN5pLsHWlHIymrKoHKZVZlXWYWQMztnbz33nvvvffee++997o7nU4n99//P1xmZAFs9s5K2smeIYCqyB8/fnwfPyK+9+3vn+x+drL15XRvukV/3JlufXmy9dmXd074L/5HPt705R7B+PLOdNe02ggo/vHu9779/f8Hqy6zlY0AAAA=
B6E5AD13B777CD9FF308A54883D2AED8	1	cxsmiles	JChemExcel9wAAAB+LCAAAAAAABADtvQdgHEmWJSYvbcp7f0r1StfgdKEIgGATJNiQQBDswYjN5pLsHWlHIymrKoHKZVZlXWYWQMztnbz33nvvvffee++997o7nU4n99//P1xmZAFs9s5K2smeIYCqyB8/fnwfPyK+9+3vf3myu3ey9dmXd0626K87/M/JPfmxLz+8L+73Prnx1/tbXfAKu/tJ/HVFZfeWzeXXL6Nd7plf/x9RVWmo9wAAAA==
60889FC40DBC83DEEB5F45622E5EBE72	1	cxsmiles	JChemExcel/AAAAB+LCAAAAAAABADtvQdgHEmWJSYvbcp7f0r1StfgdKEIgGATJNiQQBDswYjN5pLsHWlHIymrKoHKZVZlXWYWQMztnbz33nvvvffee++997o7nU4n99//P1xmZAFs9s5K2smeIYCqyB8/fnwfPyK+9+3vf3myu0U/7pzwv71f97a8v7wvB5rfkx/7vS/u848vTz7d+rL/arwL/vXTDR17gKnHk63PvgxRv9cBxn/uml//H11gRLH8AAAA
E2ACEDF3343E718050449CE3AEA59D98	1	cxsmiles	JChemExcel6wAAAB+LCAAAAAAABADtvQdgHEmWJSYvbcp7f0r1StfgdKEIgGATJNiQQBDswYjN5pLsHWlHIymrKoHKZVZlXWYWQMztnbz33nvvvffee++997o7nU4n99//P1xmZAFs9s5K2smeIYCqyB8/fnwfPyK+9+3vf3my9dmXd0626Nc7/E//V+8T/nR3oB3/uic/7vlffNlttD8AodcweKeLR9BH99fdvbD5/wPV5Sch6wAAAA==
066B3B87AB5DED5713F70DB942A0EF2F	1	cxsmiles	JChemExcelVgAAAB+LCAAAAAAABADtvQdgHEmWJSYvbcp7f0r1StfgdKEIgGATJNiQQBDswYjN5pLsHWlHIymrKoHKZVZlXWYWQMztnbz33nvvvffee++997o7nU4n99//P1xmZAFs9s5K2smeIYCqyB8/fnwfPyK+9+3vfzndnW7Rzzv6797J1mdf3jnZ+nJ6L/jc//ce/v0Mbfamu/j9hD/nf7737e//P+AnwPpWAAAA
E5416AA2D952720823BBDFF6BC4A6C40	1	cxsmiles	JChemExcelYgAAAB+LCAAAAAAABADtvQdgHEmWJSYvbcp7f0r1StfgdKEIgGATJNiQQBDswYjN5pLsHWlHIymrKoHKZVZlXWYWQMztnbz33nvvvffee++997o7nU4n99//P1xmZAFs9s5K2smeIYCqyB8/fnwfPyK+9+3vT3enW/TjjvlXf+7i35Otz76kf/Ar//PaNV5O95b073J3z28gL/l//j/aYSvyYgAAAA==
8A764D694BED67063750CC745CF25ADF	1	cxsmiles	JChemExcelbQAAAB+LCAAAAAAABADtvQdgHEmWJSYvbcp7f0r1StfgdKEIgGATJNiQQBDswYjN5pLsHWlHIymrKoHKZVZlXWYWQMztnbz33nvvvffee++997o7nU4n99//P1xmZAFs9s5K2smeIYCqyB8/fnwfPyK+9+3vfzndnW7RzzvmX/25i39Pdj874T+/nO6Z77+UT7b0B/7hpuGftjX/2CNAX/4/+EMGF20AAAA=
9846BD2687A58AA1A8625EA410FF8B4A	1	cxsmiles	JChemExcel6wAAAB+LCAAAAAAABADtvQdgHEmWJSYvbcp7f0r1StfgdKEIgGATJNiQQBDswYjN5pLsHWlHIymrKoHKZVZlXWYWQMztnbz33nvvvffee++997o7nU4n99//P1xmZAFs9s5K2smeIYCqyB8/fnwfPyK+9+3vf3myu0U/7pzwv/Lr3mcnvc/uyY/93hf3+ceXJ1tf0q8nW5996X/7ZfcDBdL9xIPX73NvU/Nd++mGVt/79vf/H2wdz1LrAAAA
D2BE3D0C8574CAC5A9FC9454E1312AA2	1	cxsmiles	JChemExcel6wAAAB+LCAAAAAAABADtvQdgHEmWJSYvbcp7f0r1StfgdKEIgGATJNiQQBDswYjN5pLsHWlHIymrKoHKZVZlXWYWQMztnbz33nvvvffee++997o7nU4n99//P1xmZAFs9s5K2smeIYCqyB8/fnwfPyK+9+3vf3my9dmXd0626Nc7/E//V+8T/nR3oB3/uic/7m1qsz/w5Zcb3+miMdSFQNndC9v/P8E4UeTrAAAA
D9A63812052A1186A235D22B3D536FF5	1	cxsmiles	JChemExcelcgAAAB+LCAAAAAAABADtvQdgHEmWJSYvbcp7f0r1StfgdKEIgGATJNiQQBDswYjN5pLsHWlHIymrKoHKZVZlXWYWQMztnbz33nvvvffee++997o7nU4n99//P1xmZAFs9s5K2smeIYCqyB8/fnwfPyK+9+3vf3my9dmXd0626Nc7W19Od6f8m/67p19+Ob0XfO7/ew//foY2e9Nd/K6w8E//z/8H7SL1mXIAAAA=
6F54F23C660738B12F0335EF33EBD9D5	1	cxsmiles	JChemExcelVgAAAB+LCAAAAAAABADtvQdgHEmWJSYvbcp7f0r1StfgdKEIgGATJNiQQBDswYjN5pLsHWlHIymrKoHKZVZlXWYWQMztnbz33nvvvffee++997o7nU4n99//P1xmZAFs9s5K2smeIYCqyB8/fnwfPyK+9+3vT3enW/Tjjv67N92a7srf+snucjnden3Cf2yd/PiLO/or/sH/l3u7nY/+H35qY2ZWAAAA
CA1B6E36BD830376E0604CFE03AB494C	1	cxsmiles	JChemExcelYAAAAB+LCAAAAAAABADtvQdgHEmWJSYvbcp7f0r1StfgdKEIgGATJNiQQBDswYjN5pLsHWlHIymrKoHKZVZlXWYWQMztnbz33nvvvffee++997o7nU4n99//P1xmZAFs9s5K2smeIYCqyB8/fnwfPyK+9+3vv9h98dnJ1outk93PXt852aJP7mxNd6f8S+TfXfyrzfCPfOg3WXot/x8z51OJYAAAAA==
5212B39625D320E8B06C020F64231D59	1	cxsmiles	JChemExcelcQAAAB+LCAAAAAAABADtvQdgHEmWJSYvbcp7f0r1StfgdKEIgGATJNiQQBDswYjN5pLsHWlHIymrKoHKZVZlXWYWQMztnbz33nvvvffee++997o7nU4n99//P1xmZAFs9s5K2smeIYCqyB8/fnwfPyK+9+3vT3enW9V0a7p7svvZydaX073pFn16Z7r15Qn/wv/IJ96/e9T6yzudFr0/qUkHyv8DEzL7GnEAAAA=
409B2309F22344FA4DE3173566A89097	1	cxsmiles	JChemExcelUgAAAB+LCAAAAAAABADtvQdgHEmWJSYvbcp7f0r1StfgdKEIgGATJNiQQBDswYjN5pLsHWlHIymrKoHKZVZlXWYWQMztnbz33nvvvffee++997o7nU4n99//P1xmZAFs9s5K2smeIYCqyB8/fnwfPyK+9+3vv9iif+5Md6fyc2s53bO/Lnf37my7r3r/7uLfE/6d//net7///wBJNzlNUgAAAA==
7E21AC741E216584554E4CA3D0E8D6F7	1	cxsmiles	JChemExcelNwAAAB+LCAAAAAAABADtvQdgHEmWJSYvbcp7f0r1StfgdKEIgGATJNiQQBDswYjN5pLsHWlHIymrKoHKZVZlXWYWQMztnbz33nvvvffee++997o7nU4n99//P1xmZAFs9s5K2smeIYCqyB8/fnwfPyK+9+3vT3enWyflnekW/X5nuTfden3Cv/I/3q/89XK6N909Kf8fNqkiHjcAAAA=
0FF726AB2061C4939A2C6D465F1311CD	1	cxsmiles	JChemExcelUQAAAB+LCAAAAAAABADtvQdgHEmWJSYvbcp7f0r1StfgdKEIgGATJNiQQBDswYjN5pLsHWlHIymrKoHKZVZlXWYWQMztnbz33nvvvffee++997o7nU4n99//P1xmZAFs9s5K2smeIYCqyB8/fnwfPyK+9+3vv9g92frs9Z3l3nK6tZzubU/3plv08Z3Iv7t7d7anu8Nff+/b3/9/ABuNOodRAAAA
51B13BE72064F67600F7DD8B1026D857	1	cxsmiles	JChemExcelPwAAAB+LCAAAAAAABADtvQdgHEmWJSYvbcp7f0r1StfgdKEIgGATJNiQQBDswYjN5pLsHWlHIymrKoHKZVZlXWYWQMztnbz33nvvvffee++997o7nU4n99//P1xmZAFs9s5K2smeIYCqyB8/fnwfPyK+9+3vT3enW8vp3nI53Xp9skUf3OF/Tn78xZ3l3nTX+4g/Dv78fwD1rlKXPwAAAA==
F5A581C9A7E0A325ABE9C8B92AB84FC4	1	cxsmiles	JChemExceleAAAAB+LCAAAAAAABADtvQdgHEmWJSYvbcp7f0r1StfgdKEIgGATJNiQQBDswYjN5pLsHWlHIymrKoHKZVZlXWYWQMztnbz33nvvvffee++997o7nU4n99//P1xmZAFs9s5K2smeIYCqyB8/fnwfPyK+9+3vT3er6dZ0i367M93Fvydbn31558vprn4m/+7xpydbX07vBZ/7/9778oR/4X/w/8/Qfs9A9b/6fwDB1Dz7eAAAAA==
830403A3377CBF1E1956DBA71F361007	1	cxsmiles	JChemExcelOwAAAB+LCAAAAAAABADtvQdgHEmWJSYvbcp7f0r1StfgdKEIgGATJNiQQBDswYjN5pLsHWlHIymrKoHKZVZlXWYWQMztnbz33nvvvffee++997o7nU4n99//P1xmZAFs9s5K2smeIYCqyB8/fnwfPyK+9+3vT3eb6dZ0i367M93Fv9vT3aX+vac/e/8ud/f+H6HLemI7AAAA
2C11E9AA77ED3AA17B80E8628457E585	1	cxsmiles	JChemExcelUAAAAB+LCAAAAAAABADtvQdgHEmWJSYvbcp7f0r1StfgdKEIgGATJNiQQBDswYjN5pLsHWlHIymrKoHKZVZlXWYWQMztnbz33nvvvffee++997o7nU4n99//P1xmZAFs9s5K2smeIYCqyB8/fnwfPyK+9+3vf3my9dmXd6a70y364850T38G/1Ib/ML/BK12O9/8PwAQejhQAAAA
FD04341C9A3F2046877714D706FFC06A	1	cxsmiles	JChemExcelXgAAAB+LCAAAAAAABADtvQdgHEmWJSYvbcp7f0r1StfgdKEIgGATJNiQQBDswYjN5pLsHWlHIymrKoHKZVZlXWYWQMztnbz33nvvvffee++997o7nU4n99//P1xmZAFs9s5K2smeIYCqyB8/fnwfPyK+9+3vT3eX0y36ecf8O93Fz236fDnda6Zby+Xu3p0T/pL/8X6d7oavev8CyP8DYNMStl4AAAA=
E8D9C5ADAFA02695819D017559BEC56A	1	cxsmiles	JChemExcelZAAAAB+LCAAAAAAABADtvQdgHEmWJSYvbcp7f0r1StfgdKEIgGATJNiQQBDswYjN5pLsHWlHIymrKoHKZVZlXWYWQMztnbz33nvvvffee++997o7nU4n99//P1xmZAFs9s5K2smeIYCqyB8/fnwfPyK+9+3vT3eb6dZyunuyRX/c4X9eT3eXy+kefY6/plvb03vmV/lXf97Dv957+P9yd6/z0f8DUeIHAWQAAAA=
5AE273E7ACEE972A6A0D53317661FBF8	1	cxsmiles	JChemExcelYAAAAB+LCAAAAAAABADtvQdgHEmWJSYvbcp7f0r1StfgdKEIgGATJNiQQBDswYjN5pLsHWlHIymrKoHKZVZlXWYWQMztnbz33nvvvffee++997o7nU4n99//P1xmZAFs9s5K2smeIYCqyB8/fnwfPyK+9+3vv9h98dnJ1outk93PXt+Z7k636LM7kX93T/gn/+P9Kt/5LZfmhe99+/v/D4YFDQRgAAAA
4394A81CA1B81E6D01646CF032ACCF73	1	cxsmiles	JChemExcelTQAAAB+LCAAAAAAABADtvQdgHEmWJSYvbcp7f0r1StfgdKEIgGATJNiQQBDswYjN5pLsHWlHIymrKoHKZVZlXWYWQMztnbz33nvvvffee++997o7nU4n99//P1xmZAFs9s5K2smeIYCqyB8/fnwfPyK+9+3vT3eX0y36eWe6pT938e82Pt9b2g+3lnvL3Tsn/Af/g/+Hf/4/NTcFQE0AAAA=
12D0E4EAA48747770EDC138A1B9C9FAA	1	cxsmiles	JChemExcelTwAAAB+LCAAAAAAABADtvQdgHEmWJSYvbcp7f0r1StfgdKEIgGATJNiQQBDswYjN5pLsHWlHIymrKoHKZVZlXWYWQMztnbz33nvvvffee++997o7nU4n99//P1xmZAFs9s5K2smeIYCqyB8/fnwfPyK+9+3vn+x+drI13Ztu0e93zL9fnvAv/I98Mt37klp+eafzRfjn/wNLbJFjTwAAAA==
FD282280DC53878265358AD533E18BB2	1	cxsmiles	JChemExcelSgAAAB+LCAAAAAAABADtvQdgHEmWJSYvbcp7f0r1StfgdKEIgGATJNiQQBDswYjN5pLsHWlHIymrKoHKZVZlXWYWQMztnbz33nvvvffee++997o7nU4n99//P1xmZAFs9s5K2smeIYCqyB8/fnwfPyK+9+3vT3enW8vp3nK69fpki/6+w/94v+L/y+XedLfzWfjn/wNFgVGmSgAAAA==
8D8FF80FBE7EC37DE93B77AB1CA90A4E	1	cxsmiles	JChemExcelYgAAAB+LCAAAAAAABADtvQdgHEmWJSYvbcp7f0r1StfgdKEIgGATJNiQQBDswYjN5pLsHWlHIymrKoHKZVZlXWYWQMztnbz33nvvvffee++997o7nU4n99//P1xmZAFs9s5K2smeIYCqyB8/fnwfPyK+9+3vT3enW/Tjjv67t9S/ltO96S5+PeEP+J/X0136eDndMq8s95a7foNO++99+/v/DxBFuPpiAAAA
B91178D7B0C8F32BEBBF39AD5A1AAB48	1	cxsmiles	JChemExcelOgAAAB+LCAAAAAAABADtvQdgHEmWJSYvbcp7f0r1StfgdKEIgGATJNiQQBDswYjN5pLsHWlHIymrKoHKZVZlXWYWQMztnbz33nvvvffee++997o7nU4n99//P1xmZAFs9s5K2smeIYCqyB8/fnwfPyK+9+3vv9h98dnJHv1/62SL/rxDv7zYO9n97PUd+Zv/wf/DP/8fIDieTjoAAAA=
B52F5B6725E9317E51F8CF3F3ED4650C	1	cxsmiles	JChemExcelVwAAAB+LCAAAAAAABADtvQdgHEmWJSYvbcp7f0r1StfgdKEIgGATJNiQQBDswYjN5pLsHWlHIymrKoHKZVZlXWYWQMztnbz33nvvvffee++997o7nU4n99//P1xmZAFs9s5K2smeIYCqyB8/fnwfPyK+9+3vT3enW/TjjvlXf+7i3+3p7nK5Nd1bTu+Fjbx/7y2nu3t3TvgP/ud73/7+/wMSyGizVwAAAA==
2A192B01230C9F36D3B3B5D1563F0B84	1	cxsmiles	JChemExcelUgAAAB+LCAAAAAAABADtvQdgHEmWJSYvbcp7f0r1StfgdKEIgGATJNiQQBDswYjN5pLsHWlHIymrKoHKZVZlXWYWQMztnbz33nvvvffee++997o7nU4n99//P1xmZAFs9s5K2smeIYCqyB8/fnwfPyK+9+3vv9iif+5Md6fyc2s53ZtuyR/L5e7enW33Ve/fXfx7wr/zP9/79vf/H0NS65FSAAAA
81DA6A96B792C053B19BD9BEE6E25C35	1	cxsmiles	JChemExcelWAAAAB+LCAAAAAAABADtvQdgHEmWJSYvbcp7f0r1StfgdKEIgGATJNiQQBDswYjN5pLsHWlHIymrKoHKZVZlXWYWQMztnbz33nvvvffee++997o7nU4n99//P1xmZAFs9s5K2smeIYCqyB8/fnwfPyK+9+3vv9iif+5Md5fTran8urek31+f8B/yyT39pv/vPfy73N274zX/3re///8AyTvKPVgAAAA=
A2C461C7DC9B879A9B20F3938CBC4E92	1	cxsmiles	JChemExcelUAAAAB+LCAAAAAAABADtvQdgHEmWJSYvbcp7f0r1StfgdKEIgGATJNiQQBDswYjN5pLsHWlHIymrKoHKZVZlXWYWQMztnbz33nvvvffee++997o7nU4n99//P1xmZAFs9s5K2smeIYCqyB8/fnwfPyK+9+3vn+x+drI13ZtufXmyRX/e4X/w/+mW/Dvw+d6X9OaXd8Iv/x/7MHkiUAAAAA==
E6EBFF087764BA831E807A31DF10F86B	1	cxsmiles	JChemExcelQgAAAB+LCAAAAAAABADtvQdgHEmWJSYvbcp7f0r1StfgdKEIgGATJNiQQBDswYjN5pLsHWlHIymrKoHKZVZlXWYWQMztnbz33nvvvffee++997o7nU4n99//P1xmZAFs9s5K2smeIYCqyB8/fnwfPyK+9+3vT3eX063pFv12R//dxb/b9Dl9sbR/BE1cw/8HZNRit0IAAAA=
0FF1478F03955FCF51887E0BB7111BC0	1	cxsmiles	JChemExcelVQAAAB+LCAAAAAAABADtvQdgHEmWJSYvbcp7f0r1StfgdKEIgGATJNiQQBDswYjN5pLsHWlHIymrKoHKZVZlXWYWQMztnbz33nvvvffee++997o7nU4n99//P1xmZAFs9s5K2smeIYCqyB8/fnwfPyK+9+3vf3my+9nJ1pfTvekW/XUn8u8etfjyznQ3/Ep/7uLfE/6d//net7///wBKPRDBVQAAAA==
9055EDD30B311E0E16355E4395BD9705	1	cxsmiles	JChemExcelVQAAAB+LCAAAAAAABADtvQdgHEmWJSYvbcp7f0r1StfgdKEIgGATJNiQQBDswYjN5pLsHWlHIymrKoHKZVZlXWYWQMztnbz33nvvvffee++997o7nU4n99//P1xmZAFs9s5K2smeIYCqyB8/fnwfPyK+9+3vf3my+9nJ1pfTvekW/XXH/Ks/9+jbL++c8B/8D3+6G7b1/t393re///8AvjBJrlUAAAA=
E4E372B7D001BDB8C0E6CAD2AFFAF512	1	cxsmiles	JChemExcelSwAAAB+LCAAAAAAABADtvQdgHEmWJSYvbcp7f0r1StfgdKEIgGATJNiQQBDswYjN5pLsHWlHIymrKoHKZVZlXWYWQMztnbz33nvvvffee++997o7nU4n99//P1xmZAFs9s5K2smeIYCqyB8/fnwfPyK+9+3vn+x+drJ1svXZl3dOtujPO/wP/s+ffTndm2592flmutX7d3fv/wFHSn2gSwAAAA==
97FF487295D924C8CF5951EDEB2BDE2C	1	cxsmiles	JChemExcelKQAAAB+LCAAAAAAABADtvQdgHEmWJSYvbcp7f0r1StfgdKEIgGATJNiQQBDswYjN5pLsHWlHIymrKoHKZVZlXWYWQMztnbz33nvvvffee++997o7nU4n99//P1xmZAFs9s5K2smeIYCqyB8/fnwfPyK+9+3vT3eX073ldIt+vUM/Xp/wb/wP/k/f7X7v29//fwA4XdRqKQAAAA==
8C467EBB8DE43B61781A597F06E15730	1	cxsmiles	JChemExcelVQAAAB+LCAAAAAAABADtvQdgHEmWJSYvbcp7f0r1StfgdKEIgGATJNiQQBDswYjN5pLsHWlHIymrKoHKZVZlXWYWQMztnbz33nvvvffee++997o7nU4n99//P1xmZAFs9s5K2smeIYCqyB8/fnwfPyK+9+3vT3enW9V0b7o1vfflydZnX9452aJP73x2Qh9M+dfp7p5+yP/g/xv//H8AlE1y91UAAAA=
79CB6D3802D5860875A3D17C7DA73C4B	1	cxsmiles	JChemExceloAAAAB+LCAAAAAAABADtvQdgHEmWJSYvbcp7f0r1StfgdKEIgGATJNiQQBDswYjN5pLsHWlHIymrKoHKZVZlXWYWQMztnbz33nvvvffee++997o7nU4n99//P1xmZAFs9s5K2smeIYCqyB8/fnwfPyK+9+3vf3my+9nJ1snWZ1/e+XK6N92ij+5E/t3du3PCv21x+y/5w+HmewD7Jb0WfmeA4V8DTn7gH+9T/fP/AXigv+mgAAAA
FF138059582CB6E16690462EC4BA2C3B	1	cxsmiles	JChemExcelUgAAAB+LCAAAAAAABADtvQdgHEmWJSYvbcp7f0r1StfgdKEIgGATJNiQQBDswYjN5pLsHWlHIymrKoHKZVZlXWYWQMztnbz33nvvvffee++997o7nU4n99//P1xmZAFs9s5K2smeIYCqyB8/fnwfPyK+9+3vn2zRP3f4n5PdvZOtz7688yX/e7K75X0n3/OvX57sSXP/TdPo/wFME6TzUgAAAA==
B3F7856809D31AE7494659FF837E4FB3	1	cxsmiles	JChemExcel5gAAAB+LCAAAAAAABADtvQdgHEmWJSYvbcp7f0r1StfgdKEIgGATJNiQQBDswYjN5pLsHWlHIymrKoHKZVZlXWYWQMztnbz33nvvvffee++997o7nU4n99//P1xmZAFs9s5K2smeIYCqyB8/fnwfPyK+9+3vf3myu0U/7pzwv/rrZ1/e+VI/CD53v+75n8iPz+THyT3zSw9Arx/+9Uvu76Tb8OYX7Td792Kf7ppf/x9QjqNn5gAAAA==
6323C6DF6D14BFFC7164E12394D83CFA	1	cxsmiles	JChemExcelwAAAAB+LCAAAAAAABADtvQdgHEmWJSYvbcp7f0r1StfgdKEIgGATJNiQQBDswYjN5pLsHWlHIymrKoHKZVZlXWYWQMztnbz33nvvvffee++997o7nU4n99//P1xmZAFs9s5K2smeIYCqyB8/fnwfPyK+9+3vf3myu3Wy9dmXd0626K87/E/3b/nM+9r9uic/7nlffHaydbL/mfzeh+x+3e+/2vt1d28Yje99+/v/D+DJu7DAAAAA
9B672E26C75E78A8BDA2EEC2465B0894	1	cxsmiles	JChemExcel6gAAAB+LCAAAAAAABADtvQdgHEmWJSYvbcp7f0r1StfgdKEIgGATJNiQQBDswYjN5pLsHWlHIymrKoHKZVZlXWYWQMztnbz33nvvvffee++997o7nU4n99//P1xmZAFs9s5K2smeIYCqyB8/fnwfPyK+9+3vf3my9dmXd0626Nc7/E//V+8T/nR3oB3/uic/7m1qsz/w5Zcb3+misbGL3b2w+f8D81m1tOoAAAA=
BDA68D5C152A952BF1FA89F348DA0A8A	1	cxsmiles	JChemExcelxAAAAB+LCAAAAAAABADtvQdgHEmWJSYvbcp7f0r1StfgdKEIgGATJNiQQBDswYjN5pLsHWlHIymrKoHKZVZlXWYWQMztnbz33nvvvffee++997o7nU4n99//P1xmZAFs9s5K2smeIYCqyB8/fnwfPyK+9+3vf3myu3Wy9dmXd0626K87/M+X3Q/wf+9P/9c9+XGv94X36/5nJ/pZCDZos9Xtz4DsvLO7Fzb8fwDsyWdpxAAAAA==
0E1A2472E364B6D4194A0784CBBFCA61	1	cxsmiles	JChemExcelWwAAAB+LCAAAAAAABADtvQdgHEmWJSYvbcp7f0r1StfgdKEIgGATJNiQQBDswYjN5pLsHWlHIymrKoHKZVZlXWYWQMztnbz33nvvvffee++997o7nU4n99//P1xmZAFs9s5K2smeIYCqyB8/fnwfPyK+9+3vfzndnW7Rzzv6794J//zsZOtk67Mv70zvBd/qv19KI/6HP7mHf/mFL6d7093vffv7/w9Of2HWWwAAAA==
81247C3B2A81E00A2121F2F579D05B3A	1	cxsmiles	JChemExcelZgAAAB+LCAAAAAAABADtvQdgHEmWJSYvbcp7f0r1StfgdKEIgGATJNiQQBDswYjN5pLsHWlHIymrKoHKZVZlXWYWQMztnbz33nvvvffee++997o7nU4n99//P1xmZAFs9s5K2smeIYCqyB8/fnwfPyK+9+3vfzndnW7Rzzv6797J1mdf3jnZmt4zH1fTeyf8K/+D/3OTLzsffnay9eV0b7orDfyv/h+6eVQ8ZgAAAA==
42066DE6779292202E725EB643EAFD76	1	cxsmiles	JChemExcelVQAAAB+LCAAAAAAABADtvQdgHEmWJSYvbcp7f0r1StfgdKEIgGATJNiQQBDswYjN5pLsHWlHIymrKoHKZVZlXWYWQMztnbz33nvvvffee++997o7nU4n99//P1xmZAFs9s5K2smeIYCqyB8/fnwfPyK+9+3vfzndnW7Rzzv6797J1mdf3qF/TvjvL6d7013+Imzm/7srTfmf7337+/8PfXfxLlUAAAA=
9C92B1C6FAB4D3E0BBD62A4EB8674E02	1	cxsmiles	JChemExcelVwAAAB+LCAAAAAAABADtvQdgHEmWJSYvbcp7f0r1StfgdKEIgGATJNiQQBDswYjN5pLsHWlHIymrKoHKZVZlXWYWQMztnbz33nvvvffee++997o7nU4n99//P1xmZAFs9s5K2smeIYCqyB8/fnwfPyK+9+3vfzndnW7Rzzv6797J1mdf3jnZ+nJ6L/jc//felyf8C/+D/38mf3853Zvufu/b3/9/AEDY3pFXAAAA
54D54A19FB19C4048920BFE5AB1765DC	1	cxsmiles	JChemExcelVQAAAB+LCAAAAAAABADtvQdgHEmWJSYvbcp7f0r1StfgdKEIgGATJNiQQBDswYjN5pLsHWlHIymrKoHKZVZlXWYWQMztnbz33nvvvffee++997o7nU4n99//P1xmZAFs9s5K2smeIYCqyB8/fnwfPyK+9+3vfzndnW7Rzzv6797J1mdf3qF/Tra+nO5Nd/nDsIn/L39/wr/zP9/79vf/H/0N6ztVAAAA
25A50F7E14A19D60EC69203413DC3D76	1	cxsmiles	JChemExcelVgAAAB+LCAAAAAAABADtvQdgHEmWJSYvbcp7f0r1StfgdKEIgGATJNiQQBDswYjN5pLsHWlHIymrKoHKZVZlXWYWQMztnbz33nvvvffee++997o7nU4n99//P1xmZAFs9s5K2smeIYCqyB8/fnwfPyK+9+3vfzndnW7Rzzv6797J1mdf3jnhPz472fpyujfd5S/CZltfShP+x/scbf8fzimJZFYAAAA=
AA5189CC5773B32598E256AF67911943	1	cxsmiles	JChemExcelXQAAAB+LCAAAAAAABADtvQdgHEmWJSYvbcp7f0r1StfgdKEIgGATJNiQQBDswYjN5pLsHWlHIymrKoHKZVZlXWYWQMztnbz33nvvvffee++997o7nU4n99//P1xmZAFs9s5K2smeIYCqyB8/fnwfPyK+9+3vf3my9dmXd0626Nc7W6+nu8vl3nRruZzSv/houot/t6e78udSP/W+01c7v37v29//fwBm7RJVXQAAAA==
E03287CC3AE51C7BD79485D85F898CD1	1	cxsmiles	JChemExcelcwAAAB+LCAAAAAAABADtvQdgHEmWJSYvbcp7f0r1StfgdKEIgGATJNiQQBDswYjN5pLsHWlHIymrKoHKZVZlXWYWQMztnbz33nvvvffee++997o7nU4n99//P1xmZAFs9s5K2smeIYCqyB8/fnwfPyK+9+3vT3enW/TjznTL/OR/d7enu8vldC/4cOv1Cf+ydbL12Zd39Hf8g//HPlsud/c6n/0/tpaWTHMAAAA=
1BD263AC3732F8A24AD47266B42B0279	1	cxsmiles	JChemExcelWAAAAB+LCAAAAAAABADtvQdgHEmWJSYvbcp7f0r1StfgdKEIgGATJNiQQBDswYjN5pLsHWlHIymrKoHKZVZlXWYWQMztnbz33nvvvffee++997o7nU4n99//P1xmZAFs9s5K2smeIYCqyB8/fnwfPyK+9+3vfzndnW7RzzvTrS9P+Bf+Rz7hf/fo88/kK/rlyzvT3b077qXev7vf+/b3/x/fI5U4WAAAAA==
6BA1A0234DEBB3B508CC49F8F1A50221	1	cxsmiles	JChemExcelSwAAAB+LCAAAAAAABADtvQdgHEmWJSYvbcp7f0r1StfgdKEIgGATJNiQQBDswYjN5pLsHWlHIymrKoHKZVZlXWYWQMztnbz33nvvvffee++997o7nU4n99//P1xmZAFs9s5K2smeIYCqyB8/fnwfPyK+9+3vfzndnW7RzzvmX/25i39Pdj874T+/nO6Z77/0G/O/e9Tsy/8H/z5B20sAAAA=
AA9625AB39909E535D4AA6342544BC5C	1	cxsmiles	JChemExcelTAAAAB+LCAAAAAAABADtvQdgHEmWJSYvbcp7f0r1StfgdKEIgGATJNiQQBDswYjN5pLsHWlHIymrKoHKZVZlXWYWQMztnbz33nvvvffee++997o7nU4n99//P1xmZAFs9s5K2smeIYCqyB8/fnwfPyK+9+3vf3my+9nJ1pfTvekW/XVnuvWl/PD+3aMmX96Z7gYfBu12v/ft7/8/v0brkEwAAAA=
EDF84951B922D2F4F9470C19822794E3	1	cxsmiles	JChemExcelOgAAAB+LCAAAAAAABADtvQdgHEmWJSYvbcp7f0r1StfgdKEIgGATJNiQQBDswYjN5pLsHWlHIymrKoHKZVZlXWYWQMztnbz33nvvvffee++997o7nU4n99//P1xmZAFs9s5K2smeIYCqyB8/fnwfPyK+9+3vfzndnW7RzzvTvS9Ptj778s4J//XZiX6oX+5+KR/wP9/79vf/H3rMnC86AAAA
1E69743420311BD60DC87EB181B416C9	1	cxsmiles	JChemExcelVgAAAB+LCAAAAAAABADtvQdgHEmWJSYvbcp7f0r1StfgdKEIgGATJNiQQBDswYjN5pLsHWlHIymrKoHKZVZlXWYWQMztnbz33nvvvffee++997o7nU4n99//P1xmZAFs9s5K2smeIYCqyB8/fnwfPyK+9+3vfzndnW7Rzzv6797J1mdf3qF/TvjvL6d7013+Imy29aV8z/94n6Pt/wNPZnU9VgAAAA==
475A37E4D5619613FC12BA8A36F853B9	1	cxsmiles	JChemExcelOwAAAB+LCAAAAAAABADtvQdgHEmWJSYvbcp7f0r1StfgdKEIgGATJNiQQBDswYjN5pLsHWlHIymrKoHKZVZlXWYWQMztnbz33nvvvffee++997o7nU4n99//P1xmZAFs9s5K2smeIYCqyB8/fnwfPyK+9+3vfzndnW59Sb/cme59ebL12Zd3Trbw12fyY7o3lZ+7X8oH/M/3vv39/wewNYlMOwAAAA==
45DB4F035068A75126886823E2D5F261	1	cxsmiles	JChemExcelVwAAAB+LCAAAAAAABADtvQdgHEmWJSYvbcp7f0r1StfgdKEIgGATJNiQQBDswYjN5pLsHWlHIymrKoHKZVZlXWYWQMztnbz33nvvvffee++997o7nU4n99//P1xmZAFs9s5K2smeIYCqyB8/fnwfPyK+9+3vT3eX073pFv12J/Lv3nJ3m1osp1sbGu3u3Tnh3/if7337+/8P0aUnz1cAAAA=
D1F69B0C2288EF8115521CEC8DADFE33	1	cxsmiles	JChemExcel7wAAAB+LCAAAAAAABADtvQdgHEmWJSYvbcp7f0r1StfgdKEIgGATJNiQQBDswYjN5pLsHWlHIymrKoHKZVZlXWYWQMztnbz33nvvvffee++997o7nU4n99//P1xmZAFs9s5K2smeIYCqyB8/fnwfPyK+9+3vf3myu0U/7pzwv/Lr3pb3l/el3yZo/qV89NmX/udfygd7vfZDUGxvG1+599mJfhZ2F7TpDWB373vf/v7/A3Z/saHvAAAA
486000E553555F389373958704C20FD1	1	cxsmiles	JChemExcel/wAAAB+LCAAAAAAABADtvQdgHEmWJSYvbcp7f0r1StfgdKEIgGATJNiQQBDswYjN5pLsHWlHIymrKoHKZVZlXWYWQMztnbz33nvvvffee++997o7nU4n99//P1xmZAFs9s5K2smeIYCqyB8/fnwfPyK+9+3vf3my9dmXd0626Nc7/E//V+8T/nR3oB3/utdrfk/bdLrZ1487zXuvy59fbuhy/7Zd7u6FDf8fvGBoCv8AAAA=
7822FD7E72626A61B328E679C1FED308	1	cxsmiles	JChemExcelVAAAAB+LCAAAAAAABADtvQdgHEmWJSYvbcp7f0r1StfgdKEIgGATJNiQQBDswYjN5pLsHWlHIymrKoHKZVZlXWYWQMztnbz33nvvvffee++997o7nU4n99//P1xmZAFs9s5K2smeIYCqyB8/fnwfPyK+9+3vT3enW/TjznTL/OR/d7884V/4H/x/e7q7XE73gkZbrzuNlsvdvf8HhwUdw1QAAAA=
067F459D9FC05D9CEFD467815401078D	1	cxsmiles	JChemExcelOgAAAB+LCAAAAAAABADtvQdgHEmWJSYvbcp7f0r1StfgdKEIgGATJNiQQBDswYjN5pLsHWlHIymrKoHKZVZlXWYWQMztnbz33nvvvffee++997o7nU4n99//P1xmZAFs9s5K2smeIYCqyB8/fnwfPyK+9+3vfzndnW7Rzzv6796XJ1ufnfDv9MuX9MF090v5C//yP9/79vf/H165ks06AAAA
31673636C0FDBCE396AAA88F181DA6F3	1	cxsmiles	JChemExcelXgAAAB+LCAAAAAAABADtvQdgHEmWJSYvbcp7f0r1StfgdKEIgGATJNiQQBDswYjN5pLsHWlHIymrKoHKZVZlXWYWQMztnbz33nvvvffee++997o7nU4n99//P1xmZAFs9s5K2smeIYCqyB8/fnwfPyK+9+3vv9ia7i6X063XJ1v01x3+Z7q3nN5rpvI7/7u8N93Dz2b3znTX/8L8O93FTw/G9779/f8H8KOgj14AAAA=
AD8A00F75B724103DCA3A69AF9F5F9FD	1	cxsmiles	JChemExcelRQAAAB+LCAAAAAAABADtvQdgHEmWJSYvbcp7f0r1StfgdKEIgGATJNiQQBDswYjN5pLsHWlHIymrKoHKZVZlXWYWQMztnbz33nvvvffee++997o7nU4n99//P1xmZAFs9s5K2smeIYCqyB8/fnwfPyK+9+3vv9iif+5Md5fLvan8urWc7k3tH71/d/funPBv/M/3vv39/wfZNJUGRQAAAA==
CA835400B0E9704AC79D80232AE7F4A4	1	cxsmiles	JChemExcelVAAAAB+LCAAAAAAABADtvQdgHEmWJSYvbcp7f0r1StfgdKEIgGATJNiQQBDswYjN5pLsHWlHIymrKoHKZVZlXWYWQMztnbz33nvvvffee++997o7nU4n99//P1xmZAFs9s5K2smeIYCqyB8/fnwfPyK+9+3vT3enW8vp3nK6RX/c8f9d7u7dOeHf+J/X011tRM37rfXf3b3/Bz+flQ9UAAAA
11DD5F776CA1D052CAA33EB62F93E863	1	cxsmiles	JChemExcelQAAAAB+LCAAAAAAABADtvQdgHEmWJSYvbcp7f0r1StfgdKEIgGATJNiQQBDswYjN5pLsHWlHIymrKoHKZVZlXWYWQMztnbz33nvvvffee++997o7nU4n99//P1xmZAFs9s5K2smeIYCqyB8/fnwfPyK+9+3vT3eb6dZ0i367M93Fv9vT3eVyuvf6hD/b0h/4B//3/lzu7v0/IgBTGEAAAAA=
0112CF06E4329CFAEEE36165F8F4EB65	1	cxsmiles	JChemExceldQAAAB+LCAAAAAAABADtvQdgHEmWJSYvbcp7f0r1StfgdKEIgGATJNiQQBDswYjN5pLsHWlHIymrKoHKZVZlXWYWQMztnbz33nvvvffee++997o7nU4n99//P1xmZAFs9s5K2smeIYCqyB8/fnwfPyK+9+3vT3er6dZ0i367M93Fvye7/MeXJ1uffXnnZG9Lfu7ST3zM/3CzwT8Hft0zbf8f/t3EVXUAAAA=
EB8DAE73C668A2412386A025D56B89D9	1	cxsmiles	JChemExceldwAAAB+LCAAAAAAABADtvQdgHEmWJSYvbcp7f0r1StfgdKEIgGATJNiQQBDswYjN5pLsHWlHIymrKoHKZVZlXWYWQMztnbz33nvvvffee++997o7nU4n99//P1xmZAFs9s5K2smeIYCqyB8/fnwfPyK+9+3vT3enW/TjjvlXf+7i35Otz768c7LLn3wpf2yZz074U/5HmgZ/bv76/wGYcWXTdwAAAA==
0CEAD735B240BEFBBD7AAF4D4A6055B1	1	cxsmiles	JChemExcelTgAAAB+LCAAAAAAABADtvQdgHEmWJSYvbcp7f0r1StfgdKEIgGATJNiQQBDswYjN5pLsHWlHIymrKoHKZVZlXWYWQMztnbz33nvvvffee++997o7nU4n99//P1xmZAFs9s5K2smeIYCqyB8/fnwfPyK+9+3vv9ia7i6nW/TbneV0r5Hf9N/dvTsn/Jv+uaQWQQPv3+Xu3v8DQ4Rnjk4AAAA=
16069B48875C66C4A99E99AEF3E3A7AD	1	cxsmiles	JChemExcelVQAAAB+LCAAAAAAABADtvQdgHEmWJSYvbcp7f0r1StfgdKEIgGATJNiQQBDswYjN5pLsHWlHIymrKoHKZVZlXWYWQMztnbz33nvvvffee++997o7nU4n99//P1xmZAFs9s5K2smeIYCqyB8/fnwfPyK+9+3vT3eX0y36eWe6pT938e82f/56urekZ++Ev+F/uMmeeaX3795y9/8BKBkCRVUAAAA=
6D2C1CC65365130A49E16A103A9834CC	1	cxsmiles	JChemExcelTQAAAB+LCAAAAAAABADtvQdgHEmWJSYvbcp7f0r1StfgdKEIgGATJNiQQBDswYjN5pLsHWlHIymrKoHKZVZlXWYWQMztnbz33nvvvffee++997o7nU4n99//P1xmZAFs9s5K2smeIYCqyB8/fnwfPyK+9+3vT3eb6d5yukW/3qEfr6f3lvTcO+EP+B/8f7o33d2e7kqzyL+73/v29/8fPO5RFk0AAAA=
8AA0C19507AD6CC921231A846A6806DA	1	cxsmiles	JChemExcelWQAAAB+LCAAAAAAABADtvQdgHEmWJSYvbcp7f0r1StfgdKEIgGATJNiQQBDswYjN5pLsHWlHIymrKoHKZVZlXWYWQMztnbz33nvvvffee++997o7nU4n99//P1xmZAFs9s5K2smeIYCqyB8/fnwfPyK+9+3vT3eX063X073lcnqvme5Pt+izO5F/95d79+5M96Zb062GWu/eOeHP+R/8P/zz/wEKEThWWQAAAA==
E86D89297C900EB678A1103D3731714C	1	cxsmiles	JChemExcelhwAAAB+LCAAAAAAABADtvQdgHEmWJSYvbcp7f0r1StfgdKEIgGATJNiQQBDswYjN5pLsHWlHIymrKoHKZVZlXWYWQMztnbz33nvvvffee++997o7nU4n99//P1xmZAFs9s5K2smeIYCqyB8/fnwfPyK+9+3vT3enW9V0a7p7svvZydaX073pFn16Z7r15Qn/sqU/8A/+3/nTtOZ/9wjGl90WvT+piYGtH/4/sVDkeIcAAAA=
D6C20E08B79B5872FD34FEAB0897623C	1	cxsmiles	JChemExcelWgAAAB+LCAAAAAAABADtvQdgHEmWJSYvbcp7f0r1StfgdKEIgGATJNiQQBDswYjN5pLsHWlHIymrKoHKZVZlXWYWQMztnbz33nvvvffee++997o7nU4n99//P1xmZAFs9s5K2smeIYCqyB8/fnwfPyK+9+3vv9ia7i6Xe9Ot6Rb9dWe6tZzuTXfx6wl/wP9E/pzumhd6/+Lt/webJO9HWgAAAA==
625515CFAF8108DCF2E052507AF965D8	1	cxsmiles	JChemExcelPwAAAB+LCAAAAAAABADtvQdgHEmWJSYvbcp7f0r1StfgdKEIgGATJNiQQBDswYjN5pLsHWlHIymrKoHKZVZlXWYWQMztnbz33nvvvffee++997o7nU4n99//P1xmZAFs9s5K2smeIYCqyB8/fnwfPyK+9+3vT3enW8vp3nK69fpki/6+w/+c/PiLO8vl3nTX+4w/D/78fwDO88mpPwAAAA==
3D95E6D77D89CAA0D08B621A0C96CC38	1	cxsmiles	JChemExcelNQAAAB+LCAAAAAAABADtvQdgHEmWJSYvbcp7f0r1StfgdKEIgGATJNiQQBDswYjN5pLsHWlHIymrKoHKZVZlXWYWQMztnbz33nvvvffee++997o7nU4n99//P1xmZAFs9s5K2smeIYCqyB8/fnwfPyK+9+3vT3enW/Tjjv67N91qpveWy+nW6xP+hP85+fEXd5Z79+5Md7/37e//P0MRrfQ1AAAA
DDF46DC976F10ACC67BE26094A7F4EDD	1	cxsmiles	JChemExcelZQAAAB+LCAAAAAAABADtvQdgHEmWJSYvbcp7f0r1StfgdKEIgGATJNiQQBDswYjN5pLsHWlHIymrKoHKZVZlXWYWQMztnbz33nvvvffee++997o7nU4n99//P1xmZAFs9s5K2smeIYCqyB8/fnwfPyK+9+3vn+x+drJFP++cbH32Jf3zJf+c7k35Q/Pvl9KG/xn4ZA//Eqwvd++EX/0/7r05WmUAAAA=
FB6E0D1CA3493C9E2CD64BB988FFE4FD	1	cxsmiles	JChemExceldwAAAB+LCAAAAAAABADtvQdgHEmWJSYvbcp7f0r1StfgdKEIgGATJNiQQBDswYjN5pLsHWlHIymrKoHKZVZlXWYWQMztnbz33nvvvffee++997o7nU4n99//P1xmZAFs9s5K2smeIYCqyB8/fnwfPyK+9+3vT3er6dZ0i367M93Fvydbn31558vprn4m/+7xp/TPydaX0z3TEP/yP/J28Ib/7+6XYdv/B72wXA13AAAA
83152DFD5F5B2ACC6F0EA711620642ED	1	cxsmiles	JChemExcelTAAAAB+LCAAAAAAABADtvQdgHEmWJSYvbcp7f0r1StfgdKEIgGATJNiQQBDswYjN5pLsHWlHIymrKoHKZVZlXWYWQMztnbz33nvvvffee++997o7nU4n99//P1xmZAFs9s5K2smeIYCqyB8/fnwfPyK+9+3vT3er6dZ0i367M93Fv9vT3eVyuje9px/2/6VvlsvdvTsn/Cf/871vf///Aa2PBlpMAAAA
DAD291B6FACD4697CB548006F6262262	1	cxsmiles	JChemExcelbgAAAB+LCAAAAAAABADtvQdgHEmWJSYvbcp7f0r1StfgdKEIgGATJNiQQBDswYjN5pLsHWlHIymrKoHKZVZlXWYWQMztnbz33nvvvffee++997o7nU4n99//P1xmZAFs9s5K2smeIYCqyB8/fnwfPyK+9+3vT3enW/TjjvlXf+7i3xP+favz63R3udybbi2X071m9872LQF879vf/38AT9KN9G4AAAA=
4AADF54F755CF7BBD9424211048425EA	1	cxsmiles	JChemExcelUwAAAB+LCAAAAAAABADtvQdgHEmWJSYvbcp7f0r1StfgdKEIgGATJNiQQBDswYjN5pLsHWlHIymrKoHKZVZlXWYWQMztnbz33nvvvffee++997o7nU4n99//P1xmZAFs9s5K2smeIYCqyB8/fnwfPyK+9+3vT3eX0y36ecf8O93Fz236fDnda6Zby+Xu3p0T/lJa7IbtvX/x5v8D17aZbFMAAAA=
F89364F94CFB18E198AD69F86EA101E7	1	cxsmiles	JChemExcelZwAAAB+LCAAAAAAABADtvQdgHEmWJSYvbcp7f0r1StfgdKEIgGATJNiQQBDswYjN5pLsHWlHIymrKoHKZVZlXWYWQMztnbz33nvvvffee++997o7nU4n99//P1xmZAFs9s5K2smeIYCqyB8/fnwfPyK+9+3vT3er6dZ0i367M93Fvydbn31558vprn5mvtv7kr844b8+O9ma7u7pH1vylv21/+f/Aw/QPM1nAAAA
F917371C60060050129E2F4CBB8FC590	1	cxsmiles	JChemExcelVwAAAB+LCAAAAAAABADtvQdgHEmWJSYvbcp7f0r1StfgdKEIgGATJNiQQBDswYjN5pLsHWlHIymrKoHKZVZlXWYWQMztnbz33nvvvffee++997o7nU4n99//P1xmZAFs9s5K2smeIYCqyB8/fnwfPyK+9+3vT3eXy+necrq1Pb033aIP7kT+vSf/ms/C75a7e3dO+Hf+53vf/v7/A8l9VRpXAAAA
6CEF4C7FFA4572A14B727DB7DB23CAAB	1	cxsmiles	JChemExcelUQAAAB+LCAAAAAAABADtvQdgHEmWJSYvbcp7f0r1StfgdKEIgGATJNiQQBDswYjN5pLsHWlHIymrKoHKZVZlXWYWQMztnbz33nvvvffee++997o7nU4n99//P1xmZAFs9s5K2smeIYCqyB8/fnwfPyK+9+3vT3enW/TjjvlXf+7i35Otz76kf/Ar//N6urtcTvfCF9y/y929/weJQbNPUQAAAA==
E8281C117D4314254C619837765657A8	1	cxsmiles	JChemExcelUwAAAB+LCAAAAAAABADtvQdgHEmWJSYvbcp7f0r1StfgdKEIgGATJNiQQBDswYjN5pLsHWlHIymrKoHKZVZlXWYWQMztnbz33nvvvffee++997o7nU4n99//P1xmZAFs9s5K2smeIYCqyB8/fnwfPyK+9+3vT3eX0y36ecf8O93Fz236fLk33Voup3vN7p0T/lJa7IbtvX/x5v8DhHg2kFMAAAA=
3ECA6ED2121FBB14F66FEDA73B5ACF94	1	cxsmiles	JChemExcelSAAAAB+LCAAAAAAABADtvQdgHEmWJSYvbcp7f0r1StfgdKEIgGATJNiQQBDswYjN5pLsHWlHIymrKoHKZVZlXWYWQMztnbz33nvvvffee++997o7nU4n99//P1xmZAFs9s5K2smeIYCqyB8/fnwfPyK+9+3vT3eX0y36ecf8O93Fz236fDnda6Zby+XuHv4MW8m/J+Udbv7/ANwl809IAAAA
531A13DF01629DBFAFCB6D04C9B860C1	1	cxsmiles	JChemExcelUgAAAB+LCAAAAAAABADtvQdgHEmWJSYvbcp7f0r1StfgdKEIgGATJNiQQBDswYjN5pLsHWlHIymrKoHKZVZlXWYWQMztnbz33nvvvffee++997o7nU4n99//P1xmZAFs9s5K2smeIYCqyB8/fnwfPyK+9+3vT3eX073ldGu6RX/cmW5tT++ZX+Vf/XkP/57w7/wP/r/cW+52Pvt/AL3NpK9SAAAA
951CFB6CD5ECD1837ACDF87B1D041648	1	cxsmiles	JChemExcelWgAAAB+LCAAAAAAABADtvQdgHEmWJSYvbcp7f0r1StfgdKEIgGATJNiQQBDswYjN5pLsHWlHIymrKoHKZVZlXWYWQMztnbz33nvvvffee++997o7nU4n99//P1xmZAFs9s5K2smeIYCqyB8/fnwfPyK+9+3vn+x+drI13Ztu0e93zL9fnvAvW/oD/+D/nT+19d6XBOPLzpf/D9AcPU1aAAAA
15F94F0776521FC68107F2504AFA5D38	1	cxsmiles	JChemExcelUwAAAB+LCAAAAAAABADtvQdgHEmWJSYvbcp7f0r1StfgdKEIgGATJNiQQBDswYjN5pLsHWlHIymrKoHKZVZlXWYWQMztnbz33nvvvffee++997o7nU4n99//P1xmZAFs9s5K2smeIYCqyB8/fnwfPyK+9+3vT3eX0y36eWe6pT938e82fb7cm24tl9O9ZvfOCX+l35v2vX/x5v8D2OUULlMAAAA=
74C82608B787028850BCE97AF41BB20E	1	cxsmiles	JChemExcelUwAAAB+LCAAAAAAABADtvQdgHEmWJSYvbcp7f0r1StfgdKEIgGATJNiQQBDswYjN5pLsHWlHIymrKoHKZVZlXWYWQMztnbz33nvvvffee++997o7nU4n99//P1xmZAFs9s5K2smeIYCqyB8/fnwfPyK+9+3vT3eX063pFv12R//dxb/b9Plyb7q1XE73mt07J/yVfh+07r75/wBaejW5UwAAAA==
A6CDBB6787599A09C733077EE07382D7	1	cxsmiles	JChemExcelTAAAAB+LCAAAAAAABADtvQdgHEmWJSYvbcp7f0r1StfgdKEIgGATJNiQQBDswYjN5pLsHWlHIymrKoHKZVZlXWYWQMztnbz33nvvvffee++997o7nU4n99//P1xmZAFs9s5K2smeIYCqyB8/fnwfPyK+9+3vT3enW8vpXkP/Lnf37pxs0Wd3+B/vV/x/Gy3xS+Tf3e99+/v/DxhFS15MAAAA
1EFF95BFBA324F4536D8665B19059C7A	1	cxsmiles	JChemExcelPAAAAB+LCAAAAAAABADtvQdgHEmWJSYvbcp7f0r1StfgdKEIgGATJNiQQBDswYjN5pLsHWlHIymrKoHKZVZlXWYWQMztnbz33nvvvffee++997o7nU4n99//P1xmZAFs9s5K2smeIYCqyB8/fnwfPyK+9+3vT3enW810b7mcbm1P70236KM7S/mh/97jj3b37pzw3/zP9779/f8HDem1XTwAAAA=
B26008600DD34B274EB4C127F8D2609F	1	cxsmiles	JChemExcelXAAAAB+LCAAAAAAABADtvQdgHEmWJSYvbcp7f0r1StfgdKEIgGATJNiQQBDswYjN5pLsHWlHIymrKoHKZVZlXWYWQMztnbz33nvvvffee++997o7nU4n99//P1xmZAFs9s5K2smeIYCqyB8/fnwfPyK+9+3vf3my9dmXd6a70y36407k392T3c9O+FdpuWe+DVrtfbl7R1rxP9/79vf/H2Mw4FRcAAAA
62044E34A606A18B39124D5A1A701AD6	1	cxsmiles	JChemExcelRgAAAB+LCAAAAAAABADtvQdgHEmWJSYvbcp7f0r1StfgdKEIgGATJNiQQBDswYjN5pLsHWlHIymrKoHKZVZlXWYWQMztnbz33nvvvffee++997o7nU4n99//P1xmZAFs9s5K2smeIYCqyB8/fnwfPyK+9+3vT3eb6dZ0i367M93Fvyf8O//zerq7XE73muk9bdD/995yd+//AYEf+kpGAAAA
348DB5253C824C8A052C709B1316C821	1	cxsmiles	JChemExcelUgAAAB+LCAAAAAAABADtvQdgHEmWJSYvbcp7f0r1StfgdKEIgGATJNiQQBDswYjN5pLsHWlHIymrKoHKZVZlXWYWQMztnbz33nvvvffee++997o7nU4n99//P1xmZAFs9s5K2smeIYCqyB8/fnwfPyK+9+3vT3eb6dZ0i367M93Fvyf8O//zerq7XE73lrbB1nJ3z2/Qaf+9b3///wEvqGojUgAAAA==
6A3E83D32AABF32E7B169E03B2FCB573	1	cxsmiles	JChemExcelYgAAAB+LCAAAAAAABADtvQdgHEmWJSYvbcp7f0r1StfgdKEIgGATJNiQQBDswYjN5pLsHWlHIymrKoHKZVZlXWYWQMztnbz33nvvvffee++997o7nU4n99//P1xmZAFs9s5K2smeIYCqyB8/fnwfPyK+9+3vT3enW/TjjvlXf+7i35Otz76kf/Ar//N6uruc7i1to63l3nLXbyAv+X/+P6hPiNpiAAAA
0A7A68C1D94F74F16F0A6AC88A229BF3	1	cxsmiles	JChemExcelPwAAAB+LCAAAAAAABADtvQdgHEmWJSYvbcp7f0r1StfgdKEIgGATJNiQQBDswYjN5pLsHWlHIymrKoHKZVZlXWYWQMztnbz33nvvvffee++997o7nU4n99//P1xmZAFs9s5K2smeIYCqyB8/fnwfPyK+9+3vf3my9dmXd052PzvZor/uTPem8nPrS/mA/5FPvH/3vqQ3vvx/AAmFNCU/AAAA
F01C704F037B6238229AE4F4102831EF	1	cxsmiles	JChemExcelXgAAAB+LCAAAAAAABADtvQdgHEmWJSYvbcp7f0r1StfgdKEIgGATJNiQQBDswYjN5pLsHWlHIymrKoHKZVZlXWYWQMztnbz33nvvvffee++997o7nU4n99//P1xmZAFs9s5K2smeIYCqyB8/fnwfPyK+9+3vT3er6d703snWZydb9Ocd+uXLO19O7035r+kWfbkr3/A/0mToz/Cb/wfTinILXgAAAA==
4782C115FE36B4F5A8352501D0792E76	1	cxsmiles	JChemExcelXgAAAB+LCAAAAAAABADtvQdgHEmWJSYvbcp7f0r1StfgdKEIgGATJNiQQBDswYjN5pLsHWlHIymrKoHKZVZlXWYWQMztnbz33nvvvffee++997o7nU4n99//P1xmZAFs9s5K2smeIYCqyB8/fnwfPyK+9+3vn+x+drI13Ztu0e93pvemW9OtCj/4z70v6esv75zwX/wP/j/8Z/jN/wNnmiI7XgAAAA==
59345C8F90BDF6A8CD8B72815C7D4FFD	1	cxsmiles	JChemExcelbQAAAB+LCAAAAAAABADtvQdgHEmWJSYvbcp7f0r1StfgdKEIgGATJNiQQBDswYjN5pLsHWlHIymrKoHKZVZlXWYWQMztnbz33nvvvffee++997o7nU4n99//P1xmZAFs9s5K2smeIYCqyB8/fnwfPyK+9+3vf3my+9nJ1pfTvekW/XXH/Ks/9+jbL++c8B/8D3+6G7b9svt9/5Pd7337+/8PE1gUxW0AAAA=
823F61AAD4F8DC87CDB68EA1926D139C	1	cxsmiles	JChemExcelTAAAAB+LCAAAAAAABADtvQdgHEmWJSYvbcp7f0r1StfgdKEIgGATJNiQQBDswYjN5pLsHWlHIymrKoHKZVZlXWYWQMztnbz33nvvvffee++997o7nU4n99//P1xmZAFs9s5K2smeIYCqyB8/fnwfPyK+9+3vf3my+9nJ1pfTvekW/XXH/Pul98ceNfnyznR3uMXu9779/f8HfsCPvEwAAAA=
66744243AD271CCB87DBAC2D1FA48D6F	1	cxsmiles	JChemExcelWAAAAB+LCAAAAAAABADtvQdgHEmWJSYvbcp7f0r1StfgdKEIgGATJNiQQBDswYjN5pLsHWlHIymrKoHKZVZlXWYWQMztnbz33nvvvffee++997o7nU4n99//P1xmZAFs9s5K2smeIYCqyB8/fnwfPyK+9+3vfzndnW7RzzvmX/25i39Pdj874T9Ptj778s50L2z5pXzH/3if7325+/8AGAnG4lgAAAA=
6863C0A536E982EAF5BC31E899C1228D	1	cxsmiles	JChemExcelWAAAAB+LCAAAAAAABADtvQdgHEmWJSYvbcp7f0r1StfgdKEIgGATJNiQQBDswYjN5pLsHWlHIymrKoHKZVZlXWYWQMztnbz33nvvvffee++997o7nU4n99//P1xmZAFs9s5K2smeIYCqyB8/fnwfPyK+9+3vfzndnW7RzzvmX/25i39Pdj874T9Ptj778s50z7T5Uj7lf/x3+d+9L3f/H0ED9/JYAAAA
BBCE0926F6D774039FEBB16F921A75F1	1	cxsmiles	JChemExcelWAAAAB+LCAAAAAAABADtvQdgHEmWJSYvbcp7f0r1StfgdKEIgGATJNiQQBDswYjN5pLsHWlHIymrKoHKZVZlXWYWQMztnbz33nvvvffee++997o7nU4n99//P1xmZAFs9s5K2smeIYCqyB8/fnwfPyK+9+3vfzndnW7RzzvmX/25i39Pdj874T9Ptj778s50b7r1pfzN//hvef/ufbn7/wBrfnfHWAAAAA==
C8DB3D245658E92C543518DE651A3025	1	cxsmiles	JChemExcelVgAAAB+LCAAAAAAABADtvQdgHEmWJSYvbcp7f0r1StfgdKEIgGATJNiQQBDswYjN5pLsHWlHIymrKoHKZVZlXWYWQMztnbz33nvvvffee++997o7nU4n99//P1xmZAFs9s5K2smeIYCqyB8/fnwfPyK+9+3vfzndnW7Rzzv6796XJ1ufnfDv9MuX9MF0l78Im+m/X0pL/kdafe/b3/9/AHfFedFWAAAA
4BE5DB4BC95B52C4EA2AA9579CD72988	1	cxsmiles	JChemExcelSwAAAB+LCAAAAAAABADtvQdgHEmWJSYvbcp7f0r1StfgdKEIgGATJNiQQBDswYjN5pLsHWlHIymrKoHKZVZlXWYWQMztnbz33nvvvffee++997o7nU4n99//P1xmZAFs9s5K2smeIYCqyB8/fnwfPyK+9+3vf3my+9nJ1pfTvekW/XUn8u8etfjyznQ31uBL/rH7vW9///8BrC3Fk0sAAAA=
A36F0DCAB6B33D758722626E5CA3D561	1	cxsmiles	JChemExcelYQAAAB+LCAAAAAAABADtvQdgHEmWJSYvbcp7f0r1StfgdKEIgGATJNiQQBDswYjN5pLsHWlHIymrKoHKZVZlXWYWQMztnbz33nvvvffee++997o7nU4n99//P1xmZAFs9s5K2smeIYCqyB8/fnwfPyK+9+3vn+x+drL15XRvukV/3JlufXnCv/A/Q5/wv3v05pd3prvmxd6/u9/79vf/H7xRIL5hAAAA
8EAF6B77E7BF1A04A0D21F3888FD0788	1	cxsmiles	JChemExcelYwAAAB+LCAAAAAAABADtvQdgHEmWJSYvbcp7f0r1StfgdKEIgGATJNiQQBDswYjN5pLsHWlHIymrKoHKZVZlXWYWQMztnbz33nvvvffee++997o7nU4n99//P1xmZAFs9s5K2smeIYCqyB8/fnwfPyK+9+3vT3enW/TjjvlXf+7i35Pdz062vjzhT/gf/nDrsy/vTPdM++7XAbS9L3f/H/Mx2w9jAAAA
700864D897B456C0CC9D8A29CB5E06E7	1	cxsmiles	JChemExcelVgAAAB+LCAAAAAAABADtvQdgHEmWJSYvbcp7f0r1StfgdKEIgGATJNiQQBDswYjN5pLsHWlHIymrKoHKZVZlXWYWQMztnbz33nvvvffee++997o7nU4n99//P1xmZAFs9s5K2smeIYCqyB8/fnwfPyK+9+3vfzndnW7Rzzv6796XJ1ufnfDv9MuX9MF0l78Im/n/7n4p7fmf7337+/8P8n9E71YAAAA=
588E22A91B020FFF6A112DE9C3D0655D	1	cxsmiles	JChemExcelagAAAB+LCAAAAAAABADtvQdgHEmWJSYvbcp7f0r1StfgdKEIgGATJNiQQBDswYjN5pLsHWlHIymrKoHKZVZlXWYWQMztnbz33nvvvffee++997o7nU4n99//P1xmZAFs9s5K2smeIYCqyB8/fnwfPyK+9+3vv9iif+5Md6fyc2u53N2e7i7lz+V0rzFfbE/vmV/lX/15D/+e8O/8j4Db63z0/wArv2v4agAAAA==
CEE3807CC035E1423ABC0B17032BCA33	1	cxsmiles	JChemExcelVQAAAB+LCAAAAAAABADtvQdgHEmWJSYvbcp7f0r1StfgdKEIgGATJNiQQBDswYjN5pLsHWlHIymrKoHKZVZlXWYWQMztnbz33nvvvffee++997o7nU4n99//P1xmZAFs9s5K2smeIYCqyB8/fnwfPyK+9+3vv9h98dnJ1outk93PXt852aJP7vA/092p/Oz/u+t/v+x99f8AUIgSmlUAAAA=
EBC336B0EB478CB9FEE9537028AFFA50	1	cxsmiles	JChemExcelWwAAAB+LCAAAAAAABADtvQdgHEmWJSYvbcp7f0r1StfgdKEIgGATJNiQQBDswYjN5pLsHWlHIymrKoHKZVZlXWYWQMztnbz33nvvvffee++997o7nU4n99//P1xmZAFs9s5K2smeIYCqyB8/fnwfPyK+9+3vT3enW8vlFv12Z7q7Pd1dLqd7DT7a3buDP6fylf/vLv7dxou9r1yD/wcpLPO7WwAAAA==
8A36C044A81E7F811012353BB1308110	1	cxsmiles	JChemExcelSAAAAB+LCAAAAAAABADtvQdgHEmWJSYvbcp7f0r1StfgdKEIgGATJNiQQBDswYjN5pLsHWlHIymrKoHKZVZlXWYWQMztnbz33nvvvffee++997o7nU4n99//P1xmZAFs9s5K2smeIYCqyB8/fnwfPyK+9+3vT3eX063pFv12R//dxb/b9Plyb7q1XE73ml38GbTZOin95v8PkvJkn0gAAAA=
F7A41EA8C27FDB7FE0A13BD0B3561807	1	cxsmiles	JChemExcelRgAAAB+LCAAAAAAABADtvQdgHEmWJSYvbcp7f0r1StfgdKEIgGATJNiQQBDswYjN5pLsHWlHIymrKoHKZVZlXWYWQMztnbz33nvvvffee++997o7nU4n99//P1xmZAFs9s5K2smeIYCqyB8/fnwfPyK+9+3vT3er6dZ0i367M93Fvydbn31558uT3c9Ottyf0z1t0v93d+//ATJBuCNGAAAA
F6AC1F1617B7EFE097036FAD36F42298	1	cxsmiles	JChemExcelawAAAB+LCAAAAAAABADtvQdgHEmWJSYvbcp7f0r1StfgdKEIgGATJNiQQBDswYjN5pLsHWlHIymrKoHKZVZlXWYWQMztnbz33nvvvffee++997o7nU4n99//P1xmZAFs9s5K2smeIYCqyB8/fnwfPyK+9+3vT3eXy63t6d50i/64E/l3T/5dyp/Le/TLcnpvurt354Q/4X9eE5hNMJrd/wfyPZ1KawAAAA==
8BB009F9F9F2C12840F206F714F207BD	1	cxsmiles	JChemExcelTQAAAB+LCAAAAAAABADtvQdgHEmWJSYvbcp7f0r1StfgdKEIgGATJNiQQBDswYjN5pLsHWlHIymrKoHKZVZlXWYWQMztnbz33nvvvffee++997o7nU4n99//P1xmZAFs9s5K2smeIYCqyB8/fnwfPyK+9+3vv9iif+5Md5dT/mU53Vtu6e/T3b0729Nd/SP4d7qLnyf8F//zvW9///8BSMui0U0AAAA=
268535D7ABAF8EB9FDBACAE2F712642D	1	cxsmiles	JChemExcelUQAAAB+LCAAAAAAABADtvQdgHEmWJSYvbcp7f0r1StfgdKEIgGATJNiQQBDswYjN5pLsHWlHIymrKoHKZVZlXWYWQMztnbz33nvvvffee++997o7nU4n99//P1xmZAFs9s5K2smeIYCqyB8/fnwfPyK+9+3vT3enW8vp3nRrukV/3fH/Xe7u3Tnh3/gf/H8bzbvt9N/d7337+/8PgjxK/FEAAAA=
D263AD2CF3D616223199800277FD10B6	1	cxsmiles	JChemExcelXgAAAB+LCAAAAAAABADtvQdgHEmWJSYvbcp7f0r1StfgdKEIgGATJNiQQBDswYjN5pLsHWlHIymrKoHKZVZlXWYWQMztnbz33nvvvffee++997o7nU4n99//P1xmZAFs9s5K2smeIYCqyB8/fnwfPyK+9+3vv9ia7k636Jc7kX935V/z2XK6t5Tfl8vdvTvbN7z5/wAKSgO/XgAAAA==
8F716731609CD558A1EECAE9C9424FD2	1	cxsmiles	JChemExcelWgAAAB+LCAAAAAAABADtvQdgHEmWJSYvbcp7f0r1StfgdKEIgGATJNiQQBDswYjN5pLsHWlHIymrKoHKZVZlXWYWQMztnbz33nvvvffee++997o7nU4n99//P1xmZAFs9s5K2smeIYCqyB8/fnwfPyK+9+3vT3enW/TjjvlXf+7i3xe7Lz472XqxdbL72es73Ybev9z4hH/nf7737e//P+T3WwJaAAAA
A054D1558F37E00054B976D51FF4F65E	1	cxsmiles	JChemExcelZwAAAB+LCAAAAAAABADtvQdgHEmWJSYvbcp7f0r1StfgdKEIgGATJNiQQBDswYjN5pLsHWlHIymrKoHKZVZlXWYWQMztnbz33nvvvffee++997o7nU4n99//P1xmZAFs9s5K2smeIYCqyB8/fnwfPyK+9+3vv9ia7k636Jc7+u/eckt+W073prv45YT/5H+4xe5yOd2iL/23/H939zqv/D8FYOf0ZwAAAA==
261C302976D36E1BDB60E2CC8D721172	1	cxsmiles	JChemExcelaQAAAB+LCAAAAAAABADtvQdgHEmWJSYvbcp7f0r1StfgdKEIgGATJNiQQBDswYjN5pLsHWlHIymrKoHKZVZlXWYWQMztnbz33nvvvffee++997o7nU4n99//P1xmZAFs9s5K2smeIYCqyB8/fnwfPyK+9+3vv9ia7k636Jc75l/9uYt/t7tfev/uyr9L+XM53Vtu6e/T3b07J/wb//O9b3///wFaS660aQAAAA==
7540EB2A6252A1D10D3DFDD35D988FFB	1	cxsmiles	JChemExcelRQAAAB+LCAAAAAAABADtvQdgHEmWJSYvbcp7f0r1StfgdKEIgGATJNiQQBDswYjN5pLsHWlHIymrKoHKZVZlXWYWQMztnbz33nvvvffee++997o7nU4n99//P1xmZAFs9s5K2smeIYCqyB8/fnwfPyK+9+3vT3eb6dZ0i367M93Fv9vT3eV0b4kPl8s9+eyEv+d/+n/+P/eW8s1FAAAA
D70268C04B4B1F7D74CDB3FC00360B0C	1	cxsmiles	JChemExcelWgAAAB+LCAAAAAAABADtvQdgHEmWJSYvbcp7f0r1StfgdKEIgGATJNiQQBDswYjN5pLsHWlHIymrKoHKZVZlXWYWQMztnbz33nvvvffee++997o7nU4n99//P1xmZAFs9s5K2smeIYCqyB8/fnwfPyK+9+3vT3er6d50a7pFv9+Zbn15svXZl3dO+C/+hz++Z77u/bt37850N/LO/wPbJfanWgAAAA==
B53827573172DDA48023B2B8E258295E	1	cxsmiles	JChemExcelOgAAAB+LCAAAAAAABADtvQdgHEmWJSYvbcp7f0r1StfgdKEIgGATJNiQQBDswYjN5pLsHWlHIymrKoHKZVZlXWYWQMztnbz33nvvvffee++997o7nU4n99//P1xmZAFs9s5K2smeIYCqyB8/fnwfPyK+9+3vT3eX073pvenWdKuZ3ltOt+izO8u95e6dE/6V/8H/wz//H8CByRQ6AAAA
BD2B58161A5EC37BD1F9158B01CB0624	1	cxsmiles	JChemExcelRQAAAB+LCAAAAAAABADtvQdgHEmWJSYvbcp7f0r1StfgdKEIgGATJNiQQBDswYjN5pLsHWlHIymrKoHKZVZlXWYWQMztnbz33nvvvffee++997o7nU4n99//P1xmZAFs9s5K2smeIYCqyB8/fnwfPyK+9+3vv9iif+5Md6fyU//Vn7v4d3u6u5zuNdOt5XJPPjnhb/mf7337+/8Pvns+rEUAAAA=
4A935B96AAF2569C880822F92093BBAE	1	cxsmiles	JChemExcelhQAAAB+LCAAAAAAABADtvQdgHEmWJSYvbcp7f0r1StfgdKEIgGATJNiQQBDswYjN5pLsHWlHIymrKoHKZVZlXWYWQMztnbz33nvvvffee++997o7nU4n99//P1xmZAFs9s5K2smeIYCqyB8/fnwfPyK+9+3vf3myu0U/7pxsffYl/YNft76c7k35t+nWl/oR/pFPBj7f3aP/m2+H3u2/9b1vf///AfTEW9yFAAAA
6489EF29549FAFDA76A8C69B4FFFAF06	1	cxsmiles	JChemExcelUQAAAB+LCAAAAAAABADtvQdgHEmWJSYvbcp7f0r1StfgdKEIgGATJNiQQBDswYjN5pLsHWlHIymrKoHKZVZlXWYWQMztnbz33nvvvffee++997o7nU4n99//P1xmZAFs9s5K2smeIYCqyB8/fnwfPyK+9+3vfzndnW7RzzvTrenWlydbn31554T/5n/4iz3ToPfv7l6n8f8DKHyYs1EAAAA=
B0BFCDF38FAEEAA3A5836422184E810A	1	cxsmiles	JChemExcelZQAAAB+LCAAAAAAABADtvQdgHEmWJSYvbcp7f0r1StfgdKEIgGATJNiQQBDswYjN5pLsHWlHIymrKoHKZVZlXWYWQMztnbz33nvvvffee++997o7nU4n99//P1xmZAFs9s5K2smeIYCqyB8/fnwfPyK+9+3vfzndnW7RzzvmX/25i39Ptj77kv7Br1vddt6/2pabdX793re///8ACqHAaGUAAAA=
D43CE3F7C6EC94B5EEA7A23C909F44EE	1	cxsmiles	JChemExcelYwAAAB+LCAAAAAAABADtvQdgHEmWJSYvbcp7f0r1StfgdKEIgGATJNiQQBDswYjN5pLsHWlHIymrKoHKZVZlXWYWQMztnbz33nvvvffee++997o7nU4n99//P1xmZAFs9s5K2smeIYCqyB8/fnwfPyK+9+3vv9ia7i6nW/TbneV0b7mlv0939+5sT3f1j/6/u/j3hH/f0h/4x/tU//x/AMXDndljAAAA
A0E5AE54832CCD55DC525FD0E5B299C7	1	cxsmiles	JChemExcelaQAAAB+LCAAAAAAABADtvQdgHEmWJSYvbcp7f0r1StfgdKEIgGATJNiQQBDswYjN5pLsHWlHIymrKoHKZVZlXWYWQMztnbz33nvvvffee++997o7nU4n99//P1xmZAFs9s5K2smeIYCqyB8/fnwfPyK+9+3vv9ia7i6nW/TbneV0b7mlv0939+5sT3f1j/6/u/Lv8Pcn/JP/+d63v///ANQ0ggppAAAA
0B6B12B5CA7A407DDEAC73DBEB8826D8	1	cxsmiles	JChemExcelZAAAAB+LCAAAAAAABADtvQdgHEmWJSYvbcp7f0r1StfgdKEIgGATJNiQQBDswYjN5pLsHWlHIymrKoHKZVZlXWYWQMztnbz33nvvvffee++997o7nU4n99//P1xmZAFs9s5K2smeIYCqyB8/fnwfPyK+9+3vf3my9dmXd6a70y36447+u/fl9J75gBrgly39gX/w/86fwev3BObedPd73/7+/wMrjl6BZAAAAA==
0EE83C391D5B95E61FB2F74BBE475D2D	1	cxsmiles	JChemExcelbQAAAB+LCAAAAAAABADtvQdgHEmWJSYvbcp7f0r1StfgdKEIgGATJNiQQBDswYjN5pLsHWlHIymrKoHKZVZlXWYWQMztnbz33nvvvffee++997o7nU4n99//P1xmZAFs9s5K2smeIYCqyB8/fnwfPyK+9+3vfzndnW7Rzzv6717wV/jN7gn/Jn/Sa19G2gy9vbv3/wCQ1IggbQAAAA==
7B0E40DFD7182AE2BB345F8313D0ADF1	1	cxsmiles	JChemExcelXQAAAB+LCAAAAAAABADtvQdgHEmWJSYvbcp7f0r1StfgdKEIgGATJNiQQBDswYjN5pLsHWlHIymrKoHKZVZlXWYWQMztnbz33nvvvffee++997o7nU4n99//P1xmZAFs9s5K2smeIYCqyB8/fnwfPyK+9+3vfzndnW7RzzvTrS9P+Bf+Rz7x/t092frsyzuu8cZXdr/83re///8AsAnOPl0AAAA=
92A3DB52543E9B67A68277317615DFC8	1	cxsmiles	JChemExcelmAAAAB+LCAAAAAAABADtvQdgHEmWJSYvbcp7f0r1StfgdKEIgGATJNiQQBDswYjN5pLsHWlHIymrKoHKZVZlXWYWQMztnbz33nvvvffee++997o7nU4n99//P1xmZAFs9s5K2smeIYCqyB8/fnwfPyK+9+3vT3enW/Tjjv6792Jres98clKaj+Xfe6+ne9Nd/HrCH2wN//pid+DzLe+P7uu75tP/Bwotf8CYAAAA
7F2AD6AB8A349A7FD24F282D0B5989F3	1	cxsmiles	JChemExcelQgAAAB+LCAAAAAAABADtvQdgHEmWJSYvbcp7f0r1StfgdKEIgGATJNiQQBDswYjN5pLsHWlHIymrKoHKZVZlXWYWQMztnbz33nvvvffee++997o7nU4n99//P1xmZAFs9s5K2smeIYCqyB8/fnwfPyK+9+3vv9iif+5Md5dT/mU53Vtu6e/T3b0729Nd/aP/7+73vv39/wcr4FGkQgAAAA==
083677EEED47B3C1585EE799BA20E1DC	1	cxsmiles	JChemExcelPgAAAB+LCAAAAAAABADtvQdgHEmWJSYvbcp7f0r1StfgdKEIgGATJNiQQBDswYjN5pLsHWlHIymrKoHKZVZlXWYWQMztnbz33nvvvffee++997o7nU4n99//P1xmZAFs9s5K2smeIYCqyB8/fnwfPyK+9+3vT3er6d5068uTLfrjDv+D/0/v0SeffXlHPv5MfkzvTeXn3nT3e9/+/v8DgpNorD4AAAA=
2D4C88A9FCB9893EE9272D9DD535FA2C	1	cxsmiles	JChemExcelVQAAAB+LCAAAAAAABADtvQdgHEmWJSYvbcp7f0r1StfgdKEIgGATJNiQQBDswYjN5pLsHWlHIymrKoHKZVZlXWYWQMztnbz33nvvvffee++997o7nU4n99//P1xmZAFs9s5K2smeIYCqyB8/fnwfPyK+9+3vT3er6d5068uTLfrjDv+D/0/v0SefyYf0y5f0QaTR3nRXGvgf/z8P+u+LVQAAAA==
830599AF98C68B0F9F07F8C54E938BB5	1	cxsmiles	JChemExcelPgAAAB+LCAAAAAAABADtvQdgHEmWJSYvbcp7f0r1StfgdKEIgGATJNiQQBDswYjN5pLsHWlHIymrKoHKZVZlXWYWQMztnbz33nvvvffee++997o7nU4n99//P1xmZAFs9s5K2smeIYCqyB8/fnwfPyK+9+3vT3er6d50i367M7335cnWZ1/eOeG/PjvRD6dbX8qv/A9/tjfd/d63v///ALugTJw+AAAA
C045652C8616180A5A5C7FE190B7FF2B	1	cxsmiles	JChemExcel1wAAAB+LCAAAAAAABADtvQdgHEmWJSYvbcp7f0r1StfgdKEIgGATJNiQQBDswYjN5pLsHWlHIymrKoHKZVZlXWYWQMztnbz33nvvvffee++997o7nU4n99//P1xmZAFs9s5K2smeIYCqyB8/fnwfPyK+9+3vf3myRf/e4X9Otj778s7J7p757MuTXf3cNdFP7vW+8H7d/+xEPwM8/tV8sr/lNexD+rILam+32z7eZdDo/wH+efc61wAAAA==
305A4A6C8D01D3D93AB6E24543461A55	1	cxsmiles	JChemExcelvQAAAB+LCAAAAAAABADtvQdgHEmWJSYvbcp7f0r1StfgdKEIgGATJNiQQBDswYjN5pLsHWlHIymrKoHKZVZlXWYWQMztnbz33nvvvffee++997o7nU4n99//P1xmZAFs9s5K2smeIYCqyB8/fnwfPyK+9+3vf3myRf/e4X9Otj778s7J7taX8of3uft1T37c630hv57sf3aifwMW/2o+2d/y2veh9Hrd3eu2D/78fwAqHzywvQAAAA==
DD4C19FB8DF7BA20B2C288405D85E590	1	cxsmiles	JChemExcelqgAAAB+LCAAAAAAABADtvQdgHEmWJSYvbcp7f0r1StfgdKEIgGATJNiQQBDswYjN5pLsHWlHIymrKoHKZVZlXWYWQMztnbz33nvvvffee++997o7nU4n99//P1xmZAFs9s5K2smeIYCqyB8/fnwfPyK+9+3vT3er6d703nT3ZOuzL+98ebJFn93Z0h/4x3yEf/D/k3tbJ7ufnWyd7FH7kz3+3GsS/CotugC8FrumC7QcbPa9b3///wFaMpwxqgAAAA==
DC118AAE22BF88F3BD33D8484B0EEC68	1	cxsmiles	JChemExcel0AAAAB+LCAAAAAAABADtvQdgHEmWJSYvbcp7f0r1StfgdKEIgGATJNiQQBDswYjN5pLsHWlHIymrKoHKZVZlXWYWQMztnbz33nvvvffee++997o7nU4n99//P1xmZAFs9s5K2smeIYCqyB8/fnwfPyK+9+3vf3myu0U/7pzwv1tfnmx99qX5A//wd3v4XD787MR+rJ+4Zu5PgUKv6evxll/23vJ+7bzSA7G713nle9/+/v8DuRPDgdAAAAA=
8E6A2C69C20EE097524E714B99DC6171	1	cxsmiles	JChemExcelmQAAAB+LCAAAAAAABADtvQdgHEmWJSYvbcp7f0r1StfgdKEIgGATJNiQQBDswYjN5pLsHWlHIymrKoHKZVZlXWYWQMztnbz33nvvvffee++997o7nU4n99//P1xmZAFs9s5K2smeIYCqyB8/fnwfPyK+9+3vn2zRP3f4n5PdvS9Ptj778k7wmfnhfcifeG0Gfu280YOgoL1X9syX/w9Vht1fmQAAAA==
E8E585327CDE228FFA6A8756F3C23D8A	1	cxsmiles	JChemExcelIgEAAB+LCAAAAAAABADtvQdgHEmWJSYvbcp7f0r1StfgdKEIgGATJNiQQBDswYjN5pLsHWlHIymrKoHKZVZlXWYWQMztnbz33nvvvffee++997o7nU4n99//P1xmZAFs9s5K2smeIYCqyB8/fnwfPyK+9+3vn2x9drJFP+9Md6fyU//9kr758o58x/94X+7i3+73J7v840v96Mvp3mZQ93oAzIv3pnvcwgK4GSN+wQCItdv4ncW8993/A+JRDNMiAQAA
675CD9507EAA3FE1594EC3CAAF722D8C	1	cxsmiles	JChemExcelFQEAAB+LCAAAAAAABADtvQdgHEmWJSYvbcp7f0r1StfgdKEIgGATJNiQQBDswYjN5pLsHWlHIymrKoHKZVZlXWYWQMztnbz33nvvvffee++997o7nU4n99//P1xmZAFs9s5K2smeIYCqyB8/fnwfPyK+9+3vf3my9dmXd052t0626K87/A/+7/3p/7p3y3b3qN1nJ/oxOtiX3+/f8n359Uv5vfNKD8T9gdcFk/1u8z35YjeGw/e+/f3/B9UbwXwVAQAA
E890141E0002A00B5627B5B689A285D5	1	cxsmiles	JChemExcelyAEAAB+LCAAAAAAABADtvQdgHEmWJSYvbcp7f0r1StfgdKEIgGATJNiQQBDswYjN5pLsHWlHIymrKoHKZVZlXWYWQMztnbz33nvvvffee++997o7nU4n99//P1xmZAFs9s5K2smeIYCqyB8/fnwfPyK+9+3vf3myu0U/7pxsfXYiv+yZv7+88+XJPf0D//q/fnmyT/+X38Mf+Cf+TuebDe333af3Yg1+X/mdMO4A0S+2DOIdFDugvtSObmgVvNFp4mE60KI3AIf8XUX595W/79313rXzsnfPR6ADS//8fwBBWmJ/yAEAAA==
4DD2FF0491280D64DDA1809199DFC693	1	cxsmiles	JChemExcel0wAAAB+LCAAAAAAABADtvQdgHEmWJSYvbcp7f0r1StfgdKEIgGATJNiQQBDswYjN5pLsHWlHIymrKoHKZVZlXWYWQMztnbz33nvvvffee++997o7nU4n99//P1xmZAFs9s5K2smeIYCqyB8/fnwfPyK+9+3vf3myu0U/7pzwv71f97a8v/iTe9rmsy+Dhvu9hvJnt+GX3Q82dL4vP0yPAwjyDxnE9779/f8H6i/T6dMAAAA=
0D2B38DA8BF32C84BB025401009DE80E	1	cxsmiles	JChemExcelwgAAAB+LCAAAAAAABADtvQdgHEmWJSYvbcp7f0r1StfgdKEIgGATJNiQQBDswYjN5pLsHWlHIymrKoHKZVZlXWYWQMztnbz33nvvvffee++997o7nU4n99//P1xmZAFs9s5K2smeIYCqyB8/fnwfPyK+9+3vf3myu0U/7pzwv71f97a8v/iTe9rmsy+Dhvu9hvJnt+GGvvblh+lgAB/+ITh/79vf/38A/1C08sIAAAA=
6C541AC37191D9BF57D33F7CCA486438	1	cxsmiles	JChemExcelhwEAAB+LCAAAAAAABADtvQdgHEmWJSYvbcp7f0r1StfgdKEIgGATJNiQQBDswYjN5pLsHWlHIymrKoHKZVZlXWYWQMztnbz33nvvvffee++997o7nU4n99//P1xmZAFs9s5K2smeIYCqyB8/fnwfPyK+9+3vf3myu0U/7pzwv/6vX57sBX8Otbp3q1b7A73wr/e3vL+8Lweaf2reGuhsM8wHn51o68++vPPlyYNug15v9wXgvm3YGbP7OCCY+7g3GG4ldAfs/wdByT3xhwEAAA==
CDBA476A80EC99AE8CC594A2861808F3	1	cxsmiles	JChemExcel7AEAAB+LCAAAAAAABADtvQdgHEmWJSYvbcp7f0r1StfgdKEIgGATJNiQQBDswYjN5pLsHWlHIymrKoHKZVZlXWYWQMztnbz33nvvvffee++997o7nU4n99//P1xmZAFs9s5K2smeIYCqyB8/fnwfPyK+9+3vf3myRf/e4X9OdvmH+ejLkz352Pxpft4LPvZ+D1rv36rVff/P7q+fbnl/eV8ONH/Qa34w1LEP7OFnJ/r3Z1/S4B/6r8f77wH99EG34X37a4cS7uOAjJ0e+Fch/5eM13CzAbzkd53R7337+/8PQJW4hewBAAA=
3DF1F7D60B415B55685031A4D91F90A9	1	cxsmiles	JChemExcelywAAAB+LCAAAAAAABADtvQdgHEmWJSYvbcp7f0r1StfgdKEIgGATJNiQQBDswYjN5pLsHWlHIymrKoHKZVZlXWYWQMztnbz33nvvvffee++997o7nU4n99//P1xmZAFs9s5K2smeIYCqyB8/fnwfPyK+9+3vn+x+drJ3svXZyRb9cefknvzYlx/8b//XL6n9l/5H/EvsQwLU/SQOU/vdu2Xz3V5X/w9a5GXXywAAAA==
F0279A9F8B83A7516863C8A5F8858FFB	1	cxsmiles	JChemExcelBgEAAB+LCAAAAAAABADtvQdgHEmWJSYvbcp7f0r1StfgdKEIgGATJNiQQBDswYjN5pLsHWlHIymrKoHKZVZlXWYWQMztnbz33nvvvffee++997o7nU4n99//P1xmZAFs9s5K2smeIYCqyB8/fnwfPyK+9+3vf3myu0U/7pzwv1tfnux5f352ck8/95rwr/v+JwNt7vtf+M0//Ux++/Jk67MvbVefdt/3u7v/Jf+8NwCSf92zn37ZR8xrLKBk2Pj9/wGieXkNBgEAAA==
D3B39AFADEC3EBA41C5C4AB08C0F115D	1	cxsmiles	JChemExceluQAAAB+LCAAAAAAABADtvQdgHEmWJSYvbcp7f0r1StfgdKEIgGATJNiQQBDswYjN5pLsHWlHIymrKoHKZVZlXWYWQMztnbz33nvvvffee++997o7nU4n99//P1xmZAFs9s5K2smeIYCqyB8/fnwfPyK+9+3vf3myu3Wy9dmXd0626K87/A/+7/3p/7onP+71vvB+3f/sRD8LwQZttrr9bQS5uxc2/38AaUJ+lLkAAAA=
EB5473CED891CB5E9650DC23B1FD255B	1	cxsmiles	JChemExcelGgEAAB+LCAAAAAAABADtvQdgHEmWJSYvbcp7f0r1StfgdKEIgGATJNiQQBDswYjN5pLsHWlHIymrKoHKZVZlXWYWQMztnbz33nvvvffee++997o7nU4n99//P1xmZAFs9s5K2smeIYCqyB8/fnwfPyK+9+3vf3myRf/e4X9Odvf0ry/5T+8b/fjkHv9iXvJa+K16v+tbXaC7Q/3ot/xjL0Cg22hvAIchmHsCQWG7b2hEn31pPv/et7///wATpe7bGgEAAA==
958E58C872A19F79DFB898B20B01034F	1	cxsmiles	JChemExcelbgAAAB+LCAAAAAAABADtvQdgHEmWJSYvbcp7f0r1StfgdKEIgGATJNiQQBDswYjN5pLsHWlHIymrKoHKZVZlXWYWQMztnbz33nvvvffee++997o7nU4n99//P1xmZAFs9s5K2smeIYCqyB8/fnwfPyK+9+3vn2x9drJFP+9Md6dbX8qv/A9/tuX9uxf85f+7u3eHwHzJIIaafO/b3/9/AGtipDBuAAAA
AD2A34C8F703643BF751D7D8FC5B4D9F	1	cxsmiles	JChemExcel4wAAAB+LCAAAAAAABADtvQdgHEmWJSYvbcp7f0r1StfgdKEIgGATJNiQQBDswYjN5pLsHWlHIymrKoHKZVZlXWYWQMztnbz33nvvvffee++997o7nU4n99//P1xmZAFs9s5K2smeIYCqyB8/fnwfPyK+9+3vfzndne6dbH325Z0vp/emW/TJHfPvdF8/35rubU/v7d+Z7k23vjy5x19/ecI/tvQH/sH/9c8ve7+bt9777W4TBeAj6v27u2de1Bf+HwXjjaHjAAAA
9D144947FE94B2A0A83021B53B92186E	1	cxsmiles	JChemExcelYgAAAB+LCAAAAAAABADtvQdgHEmWJSYvbcp7f0r1StfgdKEIgGATJNiQQBDswYjN5pLsHWlHIymrKoHKZVZlXWYWQMztnbz33nvvvffee++997o7nU4n99//P1xmZAFs9s5K2smeIYCqyB8/fnwfPyK+9+3vfzndnW7Rzzv6797J1mdf3qF/TvjvL6d7013+Imy29aV8z/8MfIL3/h/D3ietYgAAAA==
D391F2358977913A20C41ECA1D2D3DFE	1	cxsmiles	JChemExcelYgAAAB+LCAAAAAAABADtvQdgHEmWJSYvbcp7f0r1StfgdKEIgGATJNiQQBDswYjN5pLsHWlHIymrKoHKZVZlXWYWQMztnbz33nvvvffee++997o7nU4n99//P1xmZAFs9s5K2smeIYCqyB8/fnwfPyK+9+3vfzndnW7RzzvTLf259+XJ1mdf3qF/Tramu3v0Cz7mf/B/709u9+Xw99/79vf/H8Aj/oViAAAA
5184DF03C6C8E3D2DF65349EF4C0F1AC	1	cxsmiles	JChemExcelTAAAAB+LCAAAAAAABADtvQdgHEmWJSYvbcp7f0r1StfgdKEIgGATJNiQQBDswYjN5pLsHWlHIymrKoHKZVZlXWYWQMztnbz33nvvvffee++997o7nU4n99//P1xmZAFs9s5K2smeIYCqyB8/fnwfPyK+9+3vfzndnW7RzzvTrS/5x97J1mdf3jnhzz472fpyujfd5S9su96/u3jz/wFCVtMCTAAAAA==
F14F5B2EF78420AA55F00F7CDA631686	1	cxsmiles	JChemExcelYwAAAB+LCAAAAAAABADtvQdgHEmWJSYvbcp7f0r1StfgdKEIgGATJNiQQBDswYjN5pLsHWlHIymrKoHKZVZlXWYWQMztnbz33nvvvffee++997o7nU4n99//P1xmZAFs9s5K2smeIYCqyB8/fnwfPyK+9+3vT3eX0y36ecf8O93Fz236fDndC796fcK/bJ1sffblHf0d/+D/sc+Wy929/wdE9mHiYwAAAA==
2373737A9F3E654B9B611B2AF282751E	1	cxsmiles	JChemExcelbgAAAB+LCAAAAAAABADtvQdgHEmWJSYvbcp7f0r1StfgdKEIgGATJNiQQBDswYjN5pLsHWlHIymrKoHKZVZlXWYWQMztnbz33nvvvffee++997o7nU4n99//P1xmZAFs9s5K2smeIYCqyB8/fnwfPyK+9+3vfzndnW7RzzvTrS/5x97J1mdf3qF/Tra+nO5Nd/HhCbfgf7iNfUVf7H7f/wRg/h9M4AcqbgAAAA==
C0D1F912C8CF1AD3035164C9126E4B57	1	cxsmiles	JChemExcelXwAAAB+LCAAAAAAABADtvQdgHEmWJSYvbcp7f0r1StfgdKEIgGATJNiQQBDswYjN5pLsHWlHIymrKoHKZVZlXWYWQMztnbz33nvvvffee++997o7nU4n99//P1xmZAFs9s5K2smeIYCqyB8/fnwfPyK+9+3vfzndnW5Nt+i3O9O9k63PTvhX+uXLO19O96a78jf/I190/qR23mfh1/8PAvRP/18AAAA=
A1967EF199C17D2E690468BFB6ECF331	1	cxsmiles	JChemExcelTgAAAB+LCAAAAAAABADtvQdgHEmWJSYvbcp7f0r1StfgdKEIgGATJNiQQBDswYjN5pLsHWlHIymrKoHKZVZlXWYWQMztnbz33nvvvffee++997o7nU4n99//P1xmZAFs9s5K2smeIYCqyB8/fnwfPyK+9+3vf3my+9nJ1pfTvekW/XVnuvWl/PD/2KM2X96Z7ppP+w138cf/A42lJUNOAAAA
F7AD3CAC4B1641E3C919D783DC8496F0	1	cxsmiles	JChemExcelTAAAAB+LCAAAAAAABADtvQdgHEmWJSYvbcp7f0r1StfgdKEIgGATJNiQQBDswYjN5pLsHWlHIymrKoHKZVZlXWYWQMztnbz33nvvvffee++997o7nU4n99//P1xmZAFs9s5K2smeIYCqyB8/fnwfPyK+9+3vf3my+9nJ1pfTvekW/XVnuvWl/PD/2KM2X96Z7ppPe//ufu/b3/9/AEA3akZMAAAA
3CCECD2A8F8CE98763C2209E51212CAE	1	cxsmiles	JChemExcelTQAAAB+LCAAAAAAABADtvQdgHEmWJSYvbcp7f0r1StfgdKEIgGATJNiQQBDswYjN5pLsHWlHIymrKoHKZVZlXWYWQMztnbz33nvvvffee++997o7nU4n99//P1xmZAFs9s5K2smeIYCqyB8/fnwfPyK+9+3vf3my+9nJ1pfTvekW/XVnuvWl/PD+3aMmX96Z7gYfmnbyY/d73/7+/wM1SryaTQAAAA==
CFBEC36514160CC04A15F7DC821D659A	1	cxsmiles	JChemExcelLwAAAB+LCAAAAAAABADtvQdgHEmWJSYvbcp7f0r1StfgdKEIgGATJNiQQBDswYjN5pLsHWlHIymrKoHKZVZlXWYWQMztnbz33nvvvffee++997o7nU4n99//P1xmZAFs9s5K2smeIYCqyB8/fnwfPyK+9+3vfzndnW7RzzvTvS9Ptj778s4J//XZiX6oX+5++b1vf///AQRJipUvAAAA
117C102507EE86B9ED33A853899168B5	1	cxsmiles	JChemExcelYgAAAB+LCAAAAAAABADtvQdgHEmWJSYvbcp7f0r1StfgdKEIgGATJNiQQBDswYjN5pLsHWlHIymrKoHKZVZlXWYWQMztnbz33nvvvffee++997o7nU4n99//P1xmZAFs9s5K2smeIYCqyB8/fnwfPyK+9+3vfzndnW7RzzvTvS9Ptj778s7J1pfTe/qR/Lt/wj8/kx/c6Mvp/vSe9+F0T9vufikf8D/f+/b3/x9XFMS3YgAAAA==
81DDEA499A474CBAE58E9811CBC6907D	1	cxsmiles	JChemExcelTAAAAB+LCAAAAAAABADtvQdgHEmWJSYvbcp7f0r1StfgdKEIgGATJNiQQBDswYjN5pLsHWlHIymrKoHKZVZlXWYWQMztnbz33nvvvffee++997o7nU4n99//P1xmZAFs9s5K2smeIYCqyB8/fnwfPyK+9+3vfzndnW7RzzvmX/25i39Pdj874T+/nO6Z77/0G8sfe9Tuy/8H1Lp9M0wAAAA=
72BF9DC07E3C4BAF95CEAFB7E802BB30	1	cxsmiles	JChemExcelTQAAAB+LCAAAAAAABADtvQdgHEmWJSYvbcp7f0r1StfgdKEIgGATJNiQQBDswYjN5pLsHWlHIymrKoHKZVZlXWYWQMztnbz33nvvvffee++997o7nU4n99//P1xmZAFs9s5K2smeIYCqyB8/fnwfPyK+9+3vf3my+9nJ1pfTvekW/XVnuvWl/PD/2KM2X96Z7ppP+w13v/ft7/8/xjk7VE0AAAA=
ED201CDD6FCF052708E5FD4F127B62E9	1	cxsmiles	JChemExcelWQAAAB+LCAAAAAAABADtvQdgHEmWJSYvbcp7f0r1StfgdKEIgGATJNiQQBDswYjN5pLsHWlHIymrKoHKZVZlXWYWQMztnbz33nvvvffee++997o7nU4n99//P1xmZAFs9s5K2smeIYCqyB8/fnwfPyK+9+3vfzndnW7RzzvTrS/5x97J1mdf3jnZ+vKEP+Z/8P/P6KPp3nSXG9l3/Df1B1r8P9PeD2RZAAAA
3D702B53556B03D51F930A1A2669BD8E	1	cxsmiles	JChemExcelLwAAAB+LCAAAAAAABADtvQdgHEmWJSYvbcp7f0r1StfgdKEIgGATJNiQQBDswYjN5pLsHWlHIymrKoHKZVZlXWYWQMztnbz33nvvvffee++997o7nU4n99//P1xmZAFs9s5K2smeIYCqyB8/fnwfPyK+9+3vfzndnW7Rzzv6794J//xMfpxsffblnS+ne9PdL7/37e//PxbVCssvAAAA
C522D6AEEF01BF706937C80D18969103	1	cxsmiles	JChemExcelOQAAAB+LCAAAAAAABADtvQdgHEmWJSYvbcp7f0r1StfgdKEIgGATJNiQQBDswYjN5pLsHWlHIymrKoHKZVZlXWYWQMztnbz33nvvvffee++997o7nU4n99//P1xmZAFs9s5K2smeIYCqyB8/fnwfPyK+9+3vfzndnW7Rzzv6797J1mcn/Cv98uWdL6d70135C//yP9/79vf/H4IJFWc5AAAA
460B56A20EAD89123FDF28B1BA4F56DE	1	cxsmiles	JChemExcelVwAAAB+LCAAAAAAABADtvQdgHEmWJSYvbcp7f0r1StfgdKEIgGATJNiQQBDswYjN5pLsHWlHIymrKoHKZVZlXWYWQMztnbz33nvvvffee++997o7nU4n99//P1xmZAFs9s5K2smeIYCqyB8/fnwfPyK+9+3vfzndnW7RzzvTrS/5x97J1mdf3jnhzz472fpyujfd5S9sO20tTfgf73O0/X8AaOrU5lcAAAA=
B1A56FA2BBDB7D35329C859F87645930	1	cxsmiles	JChemExcelVwAAAB+LCAAAAAAABADtvQdgHEmWJSYvbcp7f0r1StfgdKEIgGATJNiQQBDswYjN5pLsHWlHIymrKoHKZVZlXWYWQMztnbz33nvvvffee++997o7nU4n99//P1xmZAFs9s5K2smeIYCqyB8/fnwfPyK+9+3vfzndnW7RzzvTrS/5x97J1mdf3qF/TvjjL6d7013+wrbT1vI9/+N9jrb/D+mlKL9XAAAA
485EE70A83C4C6A2692E46D1EDC62D30	1	cxsmiles	JChemExcelUQAAAB+LCAAAAAAABADtvQdgHEmWJSYvbcp7f0r1StfgdKEIgGATJNiQQBDswYjN5pLsHWlHIymrKoHKZVZlXWYWQMztnbz33nvvvffee++997o7nU4n99//P1xmZAFs9s5K2smeIYCqyB8/fnwfPyK+9+3vv9iif+5Md6fyM/h3uouf29Pd5XK69/qEP93SH/gH//f+XO7u/T+y3MJYUQAAAA==
AFB3AC5BBF9707CEAEC5D16B3E63276B	1	cxsmiles	JChemExcelnQAAAB+LCAAAAAAABADtvQdgHEmWJSYvbcp7f0r1StfgdKEIgGATJNiQQBDswYjN5pLsHWlHIymrKoHKZVZlXWYWQMztnbz33nvvvffee++997o7nU4n99//P1xmZAFs9s5K2smeIYCqyB8/fnwfPyK+9+3vn2zRP3f4ny9Ptj778o73wS1+xQu73u/+d94f/Evnb/2T3/uy+93uZ1/+P5pskX6dAAAA
C6AFA4BACFFD144E7ED28A6841A689B1	1	cxsmiles	JChemExcelqgAAAB+LCAAAAAAABADtvQdgHEmWJSYvbcp7f0r1StfgdKEIgGATJNiQQBDswYjN5pLsHWlHIymrKoHKZVZlXWYWQMztnbz33nvvvffee++997o7nU4n99//P1xmZAFs9s5K2smeIYCqyB8/fnwfPyK+9+3vf3my9dmXd0626Nc7/M/J7mfyl//Znvy41/vC+3XfvtcB6LfZ8v4KQHaR2Asb/j8kVOamqgAAAA==
C54A57B51B4165B0C4A8159837E4052F	1	cxsmiles	JChemExcelyAAAAB+LCAAAAAAABADtvQdgHEmWJSYvbcp7f0r1StfgdKEIgGATJNiQQBDswYjN5pLsHWlHIymrKoHKZVZlXWYWQMztnbz33nvvvffee++997o7nU4n99//P1xmZAFs9s5K2smeIYCqyB8/fnwfPyK+9+3vf3myu/Xlyd4W/XrnhP/t/XpPfuxvanP/sxP97LMvB9vcAs7ePe8vC3C6N+UPIv/unex+9uX/AwfMaTvIAAAA
8ED282FF0C9C08BDAF6BE99BC307E8A6	1	cxsmiles	JChemExcel9QAAAB+LCAAAAAAABADtvQdgHEmWJSYvbcp7f0r1StfgdKEIgGATJNiQQBDswYjN5pLsHWlHIymrKoHKZVZlXWYWQMztnbz33nvvvffee++997o7nU4n99//P1xmZAFs9s5K2smeIYCqyB8/fnwfPyK+9+3vf3myu0U/7pzwv71f97a8v7wvB5rfkx/7m0AGAOLQe79+9uWdL7tN92/58t49/rFr2v0/UtVybPUAAAA=
92E0F515893C5F40FD2B512C942E8D82	1	cxsmiles	JChemExcel4gAAAB+LCAAAAAAABADtvQdgHEmWJSYvbcp7f0r1StfgdKEIgGATJNiQQBDswYjN5pLsHWlHIymrKoHKZVZlXWYWQMztnbz33nvvvffee++997o7nU4n99//P1xmZAFs9s5K2smeIYCqyB8/fnwfPyK+9+3vn+x+drJ1skW/3eF/8H/vz5O9re4n9+THfu8L79f7A19+ebL12Zf+5xthdNtFugS0e72GivTuZ1/+P/JpnFviAAAA
B0CE5E55E2C5095BAEAD75BCEBA8D252	1	cxsmiles	JChemExcelxQAAAB+LCAAAAAAABADtvQdgHEmWJSYvbcp7f0r1StfgdKEIgGATJNiQQBDswYjN5pLsHWlHIymrKoHKZVZlXWYWQMztnbz33nvvvffee++997o7nU4n99//P1xmZAFs9s5K2smeIYCqyB8/fnwfPyK+9+3vf3myu0U/7pzwv/Lr3pb3l/el3yZo/qV89NmX/uf6Xbe1grr32Yn+Hb7l/3qvh8fuXqfN9779/f8H4TuKWsUAAAA=
5136B4757AD6DDA90DE4AB8FAE7EAC8C	1	cxsmiles	JChemExcel0AAAAB+LCAAAAAAABADtvQdgHEmWJSYvbcp7f0r1StfgdKEIgGATJNiQQBDswYjN5pLsHWlHIymrKoHKZVZlXWYWQMztnbz33nvvvffee++997o7nU4n99//P1xmZAFs9s5K2smeIYCqyB8/fnwfPyK+9+3vf3my9dmXd052t+j3Oyf87xZ/9CV/sHdPPvtMfpzs7tKX+rs05l/3t7y/upDiX3V/3d2XDgcgxX8VJO+Zxv8P7VPIc9AAAAA=
772AF21D72BB0A4DBF220D397446BF19	1	cxsmiles	JChemExcelYwAAAB+LCAAAAAAABADtvQdgHEmWJSYvbcp7f0r1StfgdKEIgGATJNiQQBDswYjN5pLsHWlHIymrKoHKZVZlXWYWQMztnbz33nvvvffee++997o7nU4n99//P1xmZAFs9s5K2smeIYCqyB8/fnwfPyK+9+3vT3enW/Tjjv67d7L12Zd3TviPLf59ujfd5a/ChltfaiP8432+2/n8/wGR20kCYwAAAA==
AA967C8D36EDEACA381208ED7C7D3F97	1	cxsmiles	JChemExcelQQAAAB+LCAAAAAAABADtvQdgHEmWJSYvbcp7f0r1StfgdKEIgGATJNiQQBDswYjN5pLsHWlHIymrKoHKZVZlXWYWQMztnbz33nvvvffee++997o7nU4n99//P1xmZAFs9s5K2smeIYCqyB8/fnwfPyK+9+3vT3enW8vpXkP/Lnf37pxs0Wd3+B/8fxtf45fIv7vf+/b3/x/3TgDxQQAAAA==
9CCDCB83D53EB5B992982179DCC947A1	1	cxsmiles	JChemExcelXAAAAB+LCAAAAAAABADtvQdgHEmWJSYvbcp7f0r1StfgdKEIgGATJNiQQBDswYjN5pLsHWlHIymrKoHKZVZlXWYWQMztnbz33nvvvffee++997o7nU4n99//P1xmZAFs9s5K2smeIYCqyB8/fnwfPyK+9+3vT3eXy+nW65Mt+v0O/zPdW07vTeXX3r/Le9M9/rm7Pd0dajTd/d63v///AOwAgWBcAAAA
0515DD1A9D195AE2B3043156F85DBD48	1	cxsmiles	JChemExcelbAAAAB+LCAAAAAAABADtvQdgHEmWJSYvbcp7f0r1StfgdKEIgGATJNiQQBDswYjN5pLsHWlHIymrKoHKZVZlXWYWQMztnbz33nvvvffee++997o7nU4n99//P1xmZAFs9s5K2smeIYCqyB8/fnwfPyK+9+3vT3enW/TjznTL/OR/d7882frsyzvuW/mXPsUv/E+ndfA5vxx+9v8ARWGPVGwAAAA=
67CAF44561E708C0534F919965248841	1	cxsmiles	JChemExcelYAAAAB+LCAAAAAAABADtvQdgHEmWJSYvbcp7f0r1StfgdKEIgGATJNiQQBDswYjN5pLsHWlHIymrKoHKZVZlXWYWQMztnbz33nvvvffee++997o7nU4n99//P1xmZAFs9s5K2smeIYCqyB8/fnwfPyK+9+3vT3enW/TjjvlXf+7i3xP+nf9Z7k73ltOt195H/PFyukf/6bvPLBSBsff/AB4nubFgAAAA
F27679D5548F40970BE128DA5C2418CF	1	cxsmiles	JChemExcelXgAAAB+LCAAAAAAABADtvQdgHEmWJSYvbcp7f0r1StfgdKEIgGATJNiQQBDswYjN5pLsHWlHIymrKoHKZVZlXWYWQMztnbz33nvvvffee++997o7nU4n99//P1xmZAFs9s5K2smeIYCqyB8/fnwfPyK+9+3vv9g62frsyzvT3ekW/XVnKT/03135N/hsy/9ue7q7XO5Nt5bL6V6ze+eEv+J/vvft7/8/kUjcIF4AAAA=
CCFE9062DDA21BED9DA44D7D36520123	1	cxsmiles	JChemExcelxAAAAB+LCAAAAAAABADtvQdgHEmWJSYvbcp7f0r1StfgdKEIgGATJNiQQBDswYjN5pLsHWlHIymrKoHKZVZlXWYWQMztnbz33nvvvffee++997o7nU4n99//P1xmZAFs9s5K2smeIYCqyB8/fnwfPyK+9+3vT3enW/TjjvlXf+7i3xe7J/wX/+P9+mLrZOuzL+9M98JXvX/3uMGLvaH3p/cGX73XaXyyxz+6n+6aT/8fkLlNFMQAAAA=
82ABDCDF5D0FC5B6938D92EF99217833	1	cxsmiles	JChemExcelcAAAAB+LCAAAAAAABADtvQdgHEmWJSYvbcp7f0r1StfgdKEIgGATJNiQQBDswYjN5pLsHWlHIymrKoHKZVZlXWYWQMztnbz33nvvvffee++997o7nU4n99//P1xmZAFs9s5K2smeIYCqyB8/fnwfPyK+9+3vn2zRP3c+kx/yL//zerq7XE73ltN7y63p/pQ/M//qz336brm757/VARIA/963v///AEWhPwtwAAAA
D23F0769CE75FAB5D13D7B166A55E965	1	cxsmiles	JChemExcelbwAAAB+LCAAAAAAABADtvQdgHEmWJSYvbcp7f0r1StfgdKEIgGATJNiQQBDswYjN5pLsHWlHIymrKoHKZVZlXWYWQMztnbz33nvvvffee++997o7nU4n99//P1xmZAFs9s5K2smeIYCqyB8/fnwfPyK+9+3vT3enW/TjznTry5Otz768M93z/sYv/M/QJ/zv3m0+/3K6u/f/ACEumI9vAAAA
B8A3ACE6666259DCD32411D00CF70D40	1	cxsmiles	JChemExcelLAAAAB+LCAAAAAAABADtvQdgHEmWJSYvbcp7f0r1StfgdKEIgGATJNiQQBDswYjN5pLsHWlHIymrKoHKZVZlXWYWQMztnbz33nvvvffee++997o7nU4n99//P1xmZAFs9s5K2smeIYCqyB8/fnwfPyK+9+3vT3enWyflnekW/X5nuTfden3Cv/I/Jz/+4s5yOd2b7p6U/w8RnKvtLAAAAA==
16613BF020943CA4C0D12514F1ACA99C	1	cxsmiles	JChemExcelhAAAAB+LCAAAAAAABADtvQdgHEmWJSYvbcp7f0r1StfgdKEIgGATJNiQQBDswYjN5pLsHWlHIymrKoHKZVZlXWYWQMztnbz33nvvvffee++997o7nU4n99//P1xmZAFs9s5K2smeIYCqyB8/fnwfPyK+9+3vT3enW/TjznTryxP+hf+RT062Pvvyjv8xfzDdG37D+3ev/23vk93vffv7/w+QXNk1hAAAAA==
4D59D5C1C10C66D9293270081E4E70E2	1	cxsmiles	JChemExcelSgAAAB+LCAAAAAAABADtvQdgHEmWJSYvbcp7f0r1StfgdKEIgGATJNiQQBDswYjN5pLsHWlHIymrKoHKZVZlXWYWQMztnbz33nvvvffee++997o7nU4n99//P1xmZAFs9s5K2smeIYCqyB8/fnwfPyK+9+3vf3my9dmXd6a71XRvujXdok/u6L/3gr/8f/fu0Qsn/Dv/871vf///AQjhHttKAAAA
CC776813655FC5BEC6FB4946E7CA1759	1	cxsmiles	JChemExcelRAAAAB+LCAAAAAAABADtvQdgHEmWJSYvbcp7f0r1StfgdKEIgGATJNiQQBDswYjN5pLsHWlHIymrKoHKZVZlXWYWQMztnbz33nvvvffee++997o7nU4n99//P1xmZAFs9s5K2smeIYCqyB8/fnwfPyK+9+3vv9h98dnJ3uuTLfr9zmcnWy/2TnY/e31nujvlT8y/+nMX/0pb/ud73/7+/wORTV05RAAAAA==
9C5D4AAAD5DF23571B5F30165B500EAF	1	cxsmiles	JChemExcelnAAAAB+LCAAAAAAABADtvQdgHEmWJSYvbcp7f0r1StfgdKEIgGATJNiQQBDswYjN5pLsHWlHIymrKoHKZVZlXWYWQMztnbz33nvvvffee++997o7nU4n99//P1xmZAFs9s5K2smeIYCqyB8/fnwfPyK+9+3vT3enW/TjjvmX/tvFby92T/gT/sf79cXWydZnX9452et+cfOv8kr3093Yp9/79vf/HzGJ5mecAAAA
421270A5D6D31C780E558072665FB686	1	cxsmiles	JChemExcelhAAAAB+LCAAAAAAABADtvQdgHEmWJSYvbcp7f0r1StfgdKEIgGATJNiQQBDswYjN5pLsHWlHIymrKoHKZVZlXWYWQMztnbz33nvvvffee++997o7nU4n99//P1xmZAFs9s5K2smeIYCqyB8/fnwfPyK+9+3vT3enW/TjznTryxP+hf+RT/Sb3e43J1uffXnH++xL/sBBGoIXhfb/APR1kQ6EAAAA
B7E73760CDA53DEC3A74DB513F188FE7	1	cxsmiles	JChemExcelZgAAAB+LCAAAAAAABADtvQdgHEmWJSYvbcp7f0r1StfgdKEIgGATJNiQQBDswYjN5pLsHWlHIymrKoHKZVZlXWYWQMztnbz33nvvvffee++997o7nU4n99//P1xmZAFs9s5K2smeIYCqyB8/fnwfPyK+9+3vf3my9dmXd6a71XSL/tulT+6cbOFf/ufL6e6Uf9F/96i1fM2vfTnd673S//P/ATbbLNJmAAAA
60B25E6342CA1C7242AC7F2E8B4AABE6	1	cxsmiles	JChemExcelTgAAAB+LCAAAAAAABADtvQdgHEmWJSYvbcp7f0r1StfgdKEIgGATJNiQQBDswYjN5pLsHWlHIymrKoHKZVZlXWYWQMztnbz33nvvvffee++997o7nU4n99//P1xmZAFs9s5K2smeIYCqyB8/fnwfPyK+9+3vn2zRP3c+kx/yL//zerq7nO4tp1tT/nO6tdxb7voNOu2/9+3v/z/++EqZTgAAAA==
C85661DFC0535DF8DCBCEF593F642FC8	1	cxsmiles	JChemExcelPgAAAB+LCAAAAAAABADtvQdgHEmWJSYvbcp7f0r1StfgdKEIgGATJNiQQBDswYjN5pLsHWlHIymrKoHKZVZlXWYWQMztnbz33nvvvffee++997o7nU4n99//P1xmZAFs9s5K2smeIYCqyB8/fnwfPyK+9+3vT3enW/Tjjvy73JtuLZfTveku/toOv5xunZTmV3z//wA1an78PgAAAA==
F4F2F7E04AF9C1D76EB59CFBDEA4FD4E	1	cxsmiles	JChemExcelUwAAAB+LCAAAAAAABADtvQdgHEmWJSYvbcp7f0r1StfgdKEIgGATJNiQQBDswYjN5pLsHWlHIymrKoHKZVZlXWYWQMztnbz33nvvvffee++997o7nU4n99//P1xmZAFs9s5K2smeIYCqyB8/fnwfPyK+9+3vT3enW/TjjvlXf+7i32335XK6t5xuvT7hP/kf/H+53N27E372/wCODXnOUwAAAA==
A5E5BBC55D2D86E643F83041D49B76F3	1	cxsmiles	JChemExcelNgAAAB+LCAAAAAAABADtvQdgHEmWJSYvbcp7f0r1StfgdKEIgGATJNiQQBDswYjN5pLsHWlHIymrKoHKZVZlXWYWQMztnbz33nvvvffee++997o7nU4n99//P1xmZAFs9s5K2smeIYCqyB8/fnwfPyK+9+3vT3eb6dZ0i367M93Fv9vT3eVyuqcf9f5d7u79P4UcVrQ2AAAA
6AE805E8D0AC50BE54DFD905B93A37B7	1	cxsmiles	JChemExcelVAAAAB+LCAAAAAAABADtvQdgHEmWJSYvbcp7f0r1StfgdKEIgGATJNiQQBDswYjN5pLsHWlHIymrKoHKZVZlXWYWQMztnbz33nvvvffee++997o7nU4n99//P1xmZAFs9s5K2smeIYCqyB8/fnwfPyK+9+3vT3eX0y36ecf8O93Fz236fLk33Voup3vNLv7stJKf3PaEf+d/vvft7/8/Uu5C+FQAAAA=
BACD607BD181E0CBEADEEE02C6C3B5AA	1	cxsmiles	JChemExcelbQAAAB+LCAAAAAAABADtvQdgHEmWJSYvbcp7f0r1StfgdKEIgGATJNiQQBDswYjN5pLsHWlHIymrKoHKZVZlXWYWQMztnbz33nvvvffee++997o7nU4n99//P1xmZAFs9s5K2smeIYCqyB8/fnwfPyK+9+3vT3er6dZ0i367M93Fv9vT3eVyutdMt5bL3T38qd9u0afm196/Ycv+19/79vf/H0ydzjZtAAAA
14A6D424FFA3348E775A2A03B2ADB97E	1	cxsmiles	JChemExcelXQAAAB+LCAAAAAAABADtvQdgHEmWJSYvbcp7f0r1StfgdKEIgGATJNiQQBDswYjN5pLsHWlHIymrKoHKZVZlXWYWQMztnbz33nvvvffee++997o7nU4n99//P1xmZAFs9s5K2smeIYCqyB8/fnwfPyK+9+3vT3eX0y36eWe6tZzu4pdt+og+e33CH8t3e8vpPdOs9++95R5+Lne9N7737e//P5f+IMVdAAAA
CCD8DC8173673D4060CB3FF317FBBA58	1	cxsmiles	JChemExcelYgAAAB+LCAAAAAAABADtvQdgHEmWJSYvbcp7f0r1StfgdKEIgGATJNiQQBDswYjN5pLsHWlHIymrKoHKZVZlXWYWQMztnbz33nvvvffee++997o7nU4n99//P1xmZAFs9s5K2smeIYCqyB8/fnwfPyK+9+3vT3eX063pFv12R//dxb/b9Dl98fqEP5Mv9pbTe0FL/997yz38XO56b3zv29//fwB33MVmYgAAAA==
3D35E9536886549E8F3B0C3C61642789	1	cxsmiles	JChemExcelXQAAAB+LCAAAAAAABADtvQdgHEmWJSYvbcp7f0r1StfgdKEIgGATJNiQQBDswYjN5pLsHWlHIymrKoHKZVZlXWYWQMztnbz33nvvvffee++997o7nU4n99//P1xmZAFs9s5K2smeIYCqyB8/fnwfPyK+9+3vv9ia7i6Xe9Ot5XK61+zeOdmiD+/wP9Pdqfzs/7t7i+//H6PqecJdAAAA
56B2CF67B63E982DB2449C7ADF456F9E	1	cxsmiles	JChemExcelZgAAAB+LCAAAAAAABADtvQdgHEmWJSYvbcp7f0r1StfgdKEIgGATJNiQQBDswYjN5pLsHWlHIymrKoHKZVZlXWYWQMztnbz33nvvvffee++997o7nU4n99//P1xmZAFs9s5K2smeIYCqyB8/fnwfPyK+9+3vT3enW/TjjvlXf+7i3+3p7nI53WumW8vl7h7+NK3o0/A1719qecK/8T/f+/b3/x9OBqMIZgAAAA==
02DD83490957067C3E986F5CB2E8BECF	1	cxsmiles	JChemExcelVQAAAB+LCAAAAAAABADtvQdgHEmWJSYvbcp7f0r1StfgdKEIgGATJNiQQBDswYjN5pLsHWlHIymrKoHKZVZlXWYWQMztnbz33nvvvffee++997o7nU4n99//P1xmZAFs9s5K2smeIYCqyB8/fnwfPyK+9+3vv9h98dnJ1outk93PXt+Z7k636LM7kX93T/gn/yMf+F8vTavvffv7/w8Y2QrhVQAAAA==
5E87C6CF37BE8834D2A821606A8470F2	1	cxsmiles	JChemExcelXgAAAB+LCAAAAAAABADtvQdgHEmWJSYvbcp7f0r1StfgdKEIgGATJNiQQBDswYjN5pLsHWlHIymrKoHKZVZlXWYWQMztnbz33nvvvffee++997o7nU4n99//P1xmZAFs9s5K2smeIYCqyB8/fnwfPyK+9+3vv9g62frsyzvT3ekW/XVnKT/03135N/hM/5Xvtqe7y+XedGu5nO41u3dO+Ev+53vf/v7/AyeZpRReAAAA
23EDA3BF5F669EF000889C6CB0B47F28	1	cxsmiles	JChemExcelWgAAAB+LCAAAAAAABADtvQdgHEmWJSYvbcp7f0r1StfgdKEIgGATJNiQQBDswYjN5pLsHWlHIymrKoHKZVZlXWYWQMztnbz33nvvvffee++997o7nU4n99//P1xmZAFs9s5K2smeIYCqyB8/fnwfPyK+9+3vT3enW8vl3nR3ST93p3vL6d50iz6/E/l3d+/OCf/G/3i/9v/8fwDJyziPWgAAAA==
90622B26C1E4E3D01E8E5EED70C14D02	1	cxsmiles	JChemExcelbgAAAB+LCAAAAAAABADtvQdgHEmWJSYvbcp7f0r1StfgdKEIgGATJNiQQBDswYjN5pLsHWlHIymrKoHKZVZlXWYWQMztnbz33nvvvffee++997o7nU4n99//P1xmZAFs9s5K2smeIYCqyB8/fnwfPyK+9+3vv9ia7i6nW/TbneV0b7mlv0939+5sT3f1j+Df6S5+nvBf/I/3Z/xT/fP/AWjLHOluAAAA
E0DEF3889477F996953470960EF329C6	1	cxsmiles	JChemExcelTwAAAB+LCAAAAAAABADtvQdgHEmWJSYvbcp7f0r1StfgdKEIgGATJNiQQBDswYjN5pLsHWlHIymrKoHKZVZlXWYWQMztnbz33nvvvffee++997o7nU4n99//P1xmZAFs9s5K2smeIYCqyB8/fnwfPyK+9+3vT3enW8vl3nR3ST93p3vL6d50iz6/E/l3d+/OCf/G/+D/4Z//D2YgS9ZPAAAA
BA91FD802AFC986F57A471DEFEE100E1	1	cxsmiles	JChemExcelTQAAAB+LCAAAAAAABADtvQdgHEmWJSYvbcp7f0r1StfgdKEIgGATJNiQQBDswYjN5pLsHWlHIymrKoHKZVZlXWYWQMztnbz33nvvvffee++997o7nU4n99//P1xmZAFs9s5K2smeIYCqyB8/fnwfPyK+9+3vT3enW/TjjvlXf+7i3+3p7nK5N91aLqd7zS7+DNvKvyelNP9/AAyDgShNAAAA
5A65E6F9B87495C9A3F607886B777262	1	cxsmiles	JChemExcelewAAAB+LCAAAAAAABADtvQdgHEmWJSYvbcp7f0r1StfgdKEIgGATJNiQQBDswYjN5pLsHWlHIymrKoHKZVZlXWYWQMztnbz33nvvvffee++997o7nU4n99//P1xmZAFs9s5K2smeIYCqyB8/fnwfPyK+9+3vT3enW/TjznTvZOuzky3658s7X073plvT3S9P+Bv+hz/3/pbPhv4UKBub/z9gt+lvewAAAA==
DD5DD0CF263AFD5F4222D20FD0727550	1	cxsmiles	JChemExcelaQAAAB+LCAAAAAAABADtvQdgHEmWJSYvbcp7f0r1StfgdKEIgGATJNiQQBDswYjN5pLsHWlHIymrKoHKZVZlXWYWQMztnbz33nvvvffee++997o7nU4n99//P1xmZAFs9s5K2smeIYCqyB8/fnwfPyK+9+3vv9ia7i6nW/TbneV0b7mlv0939+5sT3f1j+Df6S5+nvBf/E/nz+luE7yA5v8Pt30c9GkAAAA=
7DF2F0C2A9AD409D6F920B1D216A26A6	1	cxsmiles	JChemExcelYQAAAB+LCAAAAAAABADtvQdgHEmWJSYvbcp7f0r1StfgdKEIgGATJNiQQBDswYjN5pLsHWlHIymrKoHKZVZlXWYWQMztnbz33nvvvffee++997o7nU4n99//P1xmZAFs9s5K2smeIYCqyB8/fnwfPyK+9+3vT3er6dZ062Trsy/vfHmyRZ/c4X/w/+lu9OPt6e6U/zD/6s9d/Bu2/X8AspRY1mEAAAA=
F3E6AF5F33D7F7E85DC1CAD6EC26456B	1	cxsmiles	JChemExcelWQAAAB+LCAAAAAAABADtvQdgHEmWJSYvbcp7f0r1StfgdKEIgGATJNiQQBDswYjN5pLsHWlHIymrKoHKZVZlXWYWQMztnbz33nvvvffee++997o7nU4n99//P1xmZAFs9s5K2smeIYCqyB8/fnwfPyK+9+3vv9h98dnJ3outk93PXt852TrZos/u8D/8S+dv78/p7lR+9v/d2/1/ADHiqrZZAAAA
36612EB990E51A472AE77E2EDCB62A6E	1	cxsmiles	JChemExcelbQAAAB+LCAAAAAAABADtvQdgHEmWJSYvbcp7f0r1StfgdKEIgGATJNiQQBDswYjN5pLsHWlHIymrKoHKZVZlXWYWQMztnbz33nvvvffee++997o7nU4n99//P1xmZAFs9s5K2smeIYCqyB8/fnwfPyK+9+3vT3enW/TjjvlXf+7i3xP+XT9YLqd7zXRrudzd878I2oSgvH8B7v8B/TD9QW0AAAA=
BDBE7E32ED925126B65D79D7FAAA633C	1	cxsmiles	JChemExcelVQAAAB+LCAAAAAAABADtvQdgHEmWJSYvbcp7f0r1StfgdKEIgGATJNiQQBDswYjN5pLsHWlHIymrKoHKZVZlXWYWQMztnbz33nvvvffee++997o7nU4n99//P1xmZAFs9s5K2smeIYCqyB8/fnwfPyK+9+3vT3enW9V0b7pFv9+J/Lu7d2d7urtcUovlcrrX7OLP4dbf+/b3/x/RIO4SVQAAAA==
923F0D62D7C8E48E8BAAD9169B4D04F6	1	cxsmiles	JChemExcelYAAAAB+LCAAAAAAABADtvQdgHEmWJSYvbcp7f0r1StfgdKEIgGATJNiQQBDswYjN5pLsHWlHIymrKoHKZVZlXWYWQMztnbz33nvvvffee++997o7nU4n99//P1xmZAFs9s5K2smeIYCqyB8/fnwfPyK+9+3vf3my9dmXd6a70y36407k391OA/wnX3yJHyf8B//T//P/AagSbytgAAAA
9F75F9750CD81A7410FF8182839EF5D1	1	cxsmiles	JChemExcelVQAAAB+LCAAAAAAABADtvQdgHEmWJSYvbcp7f0r1StfgdKEIgGATJNiQQBDswYjN5pLsHWlHIymrKoHKZVZlXWYWQMztnbz33nvvvffee++997o7nU4n99//P1xmZAFs9s5K2smeIYCqyB8/fnwfPyK+9+3vv9h98dnJ1outk93PXt+Z7k636LM75l/9uYt/T/h3/kc+lC+XwRto+f8ADk0F+VUAAAA=
2407750C7ABB64FF4535F3DAA2B9D042	1	cxsmiles	JChemExcelfAAAAB+LCAAAAAAABADtvQdgHEmWJSYvbcp7f0r1StfgdKEIgGATJNiQQBDswYjN5pLsHWlHIymrKoHKZVZlXWYWQMztnbz33nvvvffee++997o7nU4n99//P1xmZAFs9s5K2smeIYCqyB8/fnwfPyK+9+3vT3enW/TjznSrmu6ebH325Z0vT/gD/gf/9/780rXmf/fohZMteWu6h/eH3uz/+f8AOzym83wAAAA=
20F65886179B775C9FDE23A01CBD6FA6	1	cxsmiles	JChemExcelRgAAAB+LCAAAAAAABADtvQdgHEmWJSYvbcp7f0r1StfgdKEIgGATJNiQQBDswYjN5pLsHWlHIymrKoHKZVZlXWYWQMztnbz33nvvvffee++997o7nU4n99//P1xmZAFs9s5K2smeIYCqyB8/fnwfPyK+9+3vf3my9dmXd6a71XRrukV/06/4d3u6q3/2/92ld/AL//O9b3///wEvwJeeRgAAAA==
62913CC8D67C5E5443549C098CA9C293	1	cxsmiles	JChemExcelVAAAAB+LCAAAAAAABADtvQdgHEmWJSYvbcp7f0r1StfgdKEIgGATJNiQQBDswYjN5pLsHWlHIymrKoHKZVZlXWYWQMztnbz33nvvvffee++997o7nU4n99//P1xmZAFs9s5K2smeIYCqyB8/fnwfPyK+9+3vT3er6dZ0i367M93Fvydbn31558vprn6m/5oW/O0J/8H/yBv+n/8P7Q7EXVQAAAA=
25F17BA6A00B63DDDC29AAA35491DB98	1	cxsmiles	JChemExcelVQAAAB+LCAAAAAAABADtvQdgHEmWJSYvbcp7f0r1StfgdKEIgGATJNiQQBDswYjN5pLsHWlHIymrKoHKZVZlXWYWQMztnbz33nvvvffee++997o7nU4n99//P1xmZAFs9s5K2smeIYCqyB8/fnwfPyK+9+3vv9h98dnJ1outk93PXt+Z7k636LM7kX93T/gn/yMfyBfLsNX3vv39/wesj3uFVQAAAA==
CE0585C3A5943123ACA781EF42C522B5	1	cxsmiles	JChemExcelZAAAAB+LCAAAAAAABADtvQdgHEmWJSYvbcp7f0r1StfgdKEIgGATJNiQQBDswYjN5pLsHWlHIymrKoHKZVZlXWYWQMztnbz33nvvvffee++997o7nU4n99//P1xmZAFs9s5K2smeIYCqyB8/fnwfPyK+9+3vv9iif+5Md6db063lcnd7uruc7k3lw/6/e83unRP+lf/B/7fx7kDz3e99+/v/D+JVLAhkAAAA
8C82EEC9E5AC6115BD60FC1E898992BD	1	cxsmiles	JChemExcelRAAAAB+LCAAAAAAABADtvQdgHEmWJSYvbcp7f0r1StfgdKEIgGATJNiQQBDswYjN5pLsHWlHIymrKoHKZVZlXWYWQMztnbz33nvvvffee++997o7nU4n99//P1xmZAFs9s5K2smeIYCqyB8/fnwfPyK+9+3vv9h98dnJ3uuTrc9OtujPOy/2TnY/e31nujvlP82/+nMX/0pD/ud73/7+/wP7qPs6RAAAAA==
D1F398013FE61FAA220A4B72F407737D	1	cxsmiles	JChemExcelQAAAAB+LCAAAAAAABADtvQdgHEmWJSYvbcp7f0r1StfgdKEIgGATJNiQQBDswYjN5pLsHWlHIymrKoHKZVZlXWYWQMztnbz33nvvvffee++997o7nU4n99//P1xmZAFs9s5K2smeIYCqyB8/fnwfPyK+9+3vT3enW/TjjvlXf+7i3+3p7nK6t6Rnj77gj074a/7ne9/+/v8DxtOL2UAAAAA=
C84BAAEE25EA2BBD61D96EA215FC4DCB	1	cxsmiles	JChemExcelLQAAAB+LCAAAAAAABADtvQdgHEmWJSYvbcp7f0r1StfgdKEIgGATJNiQQBDswYjN5pLsHWlHIymrKoHKZVZlXWYWQMztnbz33nvvvffee++997o7nU4n99//P1xmZAFs9s5K2smeIYCqyB8/fnwfPyK+9+3vv9h98dnJFv1yZ7o3lZ/9f/dOdj97/f8AooZ92y0AAAA=
73F9B7071F8701B058325C4FDE4779D3	1	cxsmiles	JChemExcelSwAAAB+LCAAAAAAABADtvQdgHEmWJSYvbcp7f0r1StfgdKEIgGATJNiQQBDswYjN5pLsHWlHIymrKoHKZVZlXWYWQMztnbz33nvvvffee++997o7nU4n99//P1xmZAFs9s5K2smeIYCqyB8/fnwfPyK+9+3vT3enW9V0b7pFv9+J/Lu7d+dk67Mv73yJhkNtvvft7/8/pJmpYEsAAAA=
F018A6962639FDF2E93D6A744839A225	1	cxsmiles	JChemExcelYgAAAB+LCAAAAAAABADtvQdgHEmWJSYvbcp7f0r1StfgdKEIgGATJNiQQBDswYjN5pLsHWlHIymrKoHKZVZlXWYWQMztnbz33nvvvffee++997o7nU4n99//P1xmZAFs9s5K2smeIYCqyB8/fnwfPyK+9+3vf3my+9nJ1pfTvekW/XUn8u8etfjyznTXfPjlCf/C//Qa73a+/X8AqAhFAWIAAAA=
09C6748316EB3560ACCBC2AAD7EA9225	1	cxsmiles	JChemExcelTwAAAB+LCAAAAAAABADtvQdgHEmWJSYvbcp7f0r1StfgdKEIgGATJNiQQBDswYjN5pLsHWlHIymrKoHKZVZlXWYWQMztnbz33nvvvffee++997o7nU4n99//P1xmZAFs9s5K2smeIYCqyB8/fnwfPyK+9+3vT3eX073pFv12J/IvfTPdxW/bN7RbotX/A3sgdl1PAAAA
B2DA2FBB83E4C402F81D13D8A20AC6AF	1	cxsmiles	JChemExcelPwAAAB+LCAAAAAAABADtvQdgHEmWJSYvbcp7f0r1StfgdKEIgGATJNiQQBDswYjN5pLsHWlHIymrKoHKZVZlXWYWQMztnbz33nvvvffee++997o7nU4n99//P1xmZAFs9s5K2smeIYCqyB8/fnwfPyK+9+3vv9g92frs9Z2TLfr9zmcnW9O9Kf8a+Xd3T5vxP9/79vf/H1zUUts/AAAA
5405FA00F066DABD53C5FFC6000573DA	1	cxsmiles	JChemExcelXAAAAB+LCAAAAAAABADtvQdgHEmWJSYvbcp7f0r1StfgdKEIgGATJNiQQBDswYjN5pLsHWlHIymrKoHKZVZlXWYWQMztnbz33nvvvffee++997o7nU4n99//P1xmZAFs9s5K2smeIYCqyB8/fnwfPyK+9+3vT3enW8vl3nQL/9Hfd5bT3b07J1uffUn/4G/+B//v/LmNN/FL5N/d7337+/8PbJjwjVwAAAA=
6E3FF1ECDC9AC425DFD230A272D49F48	1	cxsmiles	JChemExcelZgAAAB+LCAAAAAAABADtvQdgHEmWJSYvbcp7f0r1StfgdKEIgGATJNiQQBDswYjN5pLsHWlHIymrKoHKZVZlXWYWQMztnbz33nvvvffee++997o7nU4n99//P1xmZAFs9s5K2smeIYCqyB8/fnwfPyK+9+3vT3enW9V0a7p7skV/3eF/vsSH+EX/3ZPvPpMfJ1uffUlN9qa78pd9zX0Zfvj/AJquSulmAAAA
769D7ED086D937F67BF01F1EA3B46839	1	cxsmiles	JChemExcelTwAAAB+LCAAAAAAABADtvQdgHEmWJSYvbcp7f0r1StfgdKEIgGATJNiQQBDswYjN5pLsHWlHIymrKoHKZVZlXWYWQMztnbz33nvvvffee++997o7nU4n99//P1xmZAFs9s5K2smeIYCqyB8/fnwfPyK+9+3vT3eXy73p1nSLfr8z3VpO96a729Nd83fv3138e8K/8z/y57M79L9n/w9v4NbMTwAAAA==
7E48EEF8ADB1A6B25897E734B5F9E355	1	cxsmiles	JChemExcelWAAAAB+LCAAAAAAABADtvQdgHEmWJSYvbcp7f0r1StfgdKEIgGATJNiQQBDswYjN5pLsHWlHIymrKoHKZVZlXWYWQMztnbz33nvvvffee++997o7nU4n99//P1xmZAFs9s5K2smeIYCqyB8/fnwfPyK+9+3vn+x+drL1+mTrsy/vTPemW1+ebNGHd/gf/D/2iffv7t4dfrXT6P8ByOJCnVgAAAA=
617FBED081C77D5219F3252715B03610	1	cxsmiles	JChemExcelOgAAAB+LCAAAAAAABADtvQdgHEmWJSYvbcp7f0r1StfgdKEIgGATJNiQQBDswYjN5pLsHWlHIymrKoHKZVZlXWYWQMztnbz33nvvvffee++997o7nU4n99//P1xmZAFs9s5K2smeIYCqyB8/fnwfPyK+9+3vT3eXy+ne9N50a7rVTO8tp1v04Z3l7t6dE/6N/8H/wz//H+SVmKI6AAAA
6B61B9C3A4212B80CB3CBD155448CA9D	1	cxsmiles	JChemExcelTgAAAB+LCAAAAAAABADtvQdgHEmWJSYvbcp7f0r1StfgdKEIgGATJNiQQBDswYjN5pLsHWlHIymrKoHKZVZlXWYWQMztnbz33nvvvffee++997o7nU4n99//P1xmZAFs9s5K2smeIYCqyB8/fnwfPyK+9+3vfzndnW7Rzzvhv9Nd/DzZ/eyEPzjZ+uzLO9O9sM2X/o+9L3f/H2UrhS5OAAAA
78D7D3330B23A29621B8F424325663CA	1	cxsmiles	JChemExcelXgAAAB+LCAAAAAAABADtvQdgHEmWJSYvbcp7f0r1StfgdKEIgGATJNiQQBDswYjN5pLsHWlHIymrKoHKZVZlXWYWQMztnbz33nvvvffee++997o7nU4n99//P1xmZAFs9s5K2smeIYCqyB8/fnwfPyK+9+3vfzndnW7RzzuRf3dPdj874V9Ptj778s50b7r15W6nyeDLe7v/Dw382EdeAAAA
5E14B736DC7385C60DA24A64E333F4C1	1	cxsmiles	JChemExcelVgAAAB+LCAAAAAAABADtvQdgHEmWJSYvbcp7f0r1StfgdKEIgGATJNiQQBDswYjN5pLsHWlHIymrKoHKZVZlXWYWQMztnbz33nvvvffee++997o7nU4n99//P1xmZAFs9s5K2smeIYCqyB8/fnwfPyK+9+3vfzndnW7RzzvTvZOtz768c8J/fHay9eV0T7/Y/VI+5H/kE/2m/+/u9779/f8HMpGEX1YAAAA=
43030220094171B6A17D4C279035D674	1	cxsmiles	JChemExcelXAAAAB+LCAAAAAAABADtvQdgHEmWJSYvbcp7f0r1StfgdKEIgGATJNiQQBDswYjN5pLsHWlHIymrKoHKZVZlXWYWQMztnbz33nvvvffee++997o7nU4n99//P1xmZAFs9s5K2smeIYCqyB8/fnwfPyK+9+3vfzndnW7RzzuRf3dPdj874V9Ptj778s50L/j23uB796Z7X+7+P6em+XlcAAAA
A8CF798852DA92743F6C60E6B620D09D	1	cxsmiles	JChemExcelWAAAAB+LCAAAAAAABADtvQdgHEmWJSYvbcp7f0r1StfgdKEIgGATJNiQQBDswYjN5pLsHWlHIymrKoHKZVZlXWYWQMztnbz33nvvvffee++997o7nU4n99//P1xmZAFs9s5K2smeIYCqyB8/fnwfPyK+9+3vfzndnW59ebJFv97hf/D/6Zb3797J1mdf3pEWn51s0Qt7d/BSr6H8u/u9b3///wGpBLsRWAAAAA==
B467138D0D6D6F7CF48C03AD2DF78C42	1	cxsmiles	JChemExcelVgAAAB+LCAAAAAAABADtvQdgHEmWJSYvbcp7f0r1StfgdKEIgGATJNiQQBDswYjN5pLsHWlHIymrKoHKZVZlXWYWQMztnbz33nvvvffee++997o7nU4n99//P1xmZAFs9s5K2smeIYCqyB8/fnwfPyK+9+3vf3my+9nJ1pfTvekW/XUn8u8etfjyznQ31uDLE/6F/+FPdr/37e//P5zckXdWAAAA
A91C0B66A4163B2149C947D74CE1D6FB	1	cxsmiles	JChemExcelTQAAAB+LCAAAAAAABADtvQdgHEmWJSYvbcp7f0r1StfgdKEIgGATJNiQQBDswYjN5pLsHWlHIymrKoHKZVZlXWYWQMztnbz33nvvvffee++997o7nU4n99//P1xmZAFs9s5K2smeIYCqyB8/fnwfPyK+9+3vfzndnW7Rzzvm35O9z07415Otz768M70Xfuv9e+/LPfr1S/5993vf/v7/A89n1DlNAAAA
64F5FCC25002CD00029303FEA449C489	1	cxsmiles	JChemExcelTQAAAB+LCAAAAAAABADtvQdgHEmWJSYvbcp7f0r1StfgdKEIgGATJNiQQBDswYjN5pLsHWlHIymrKoHKZVZlXWYWQMztnbz33nvvvffee++997o7nU4n99//P1xmZAFs9s5K2smeIYCqyB8/fnwfPyK+9+3vfzndnW7Rzzvhvyd7n53wrydbn315Z3ov1ob/vffl3p3p7pff+/b3/x+xcylbTQAAAA==
D9C14ABDF797D6375B6276475B95A3E0	1	cxsmiles	JChemExcelWAAAAB+LCAAAAAAABADtvQdgHEmWJSYvbcp7f0r1StfgdKEIgGATJNiQQBDswYjN5pLsHWlHIymrKoHKZVZlXWYWQMztnbz33nvvvffee++997o7nU4n99//P1xmZAFs9s5K2smeIYCqyB8/fnwfPyK+9+3vfzndnW7RzzvmX/25++UJ/8L/4P8nu5/JJydbn315Z7oXvuX9u/fl7v8DePOoNlgAAAA=
B01E0BE49176BB9834036709272CA530	1	cxsmiles	JChemExcelZQAAAB+LCAAAAAAABADtvQdgHEmWJSYvbcp7f0r1StfgdKEIgGATJNiQQBDswYjN5pLsHWlHIymrKoHKZVZlXWYWQMztnbz33nvvvffee++997o7nU4n99//P1xmZAFs9s5K2smeIYCqyB8/fnwfPyK+9+3vv9iif+5Md6fyc2u53N2e7i7pl+me+az37+7enW3zyjL8Bv+e8O/8z/e+/f3/B+WwUUJlAAAA
B4429608CBF807413AA99D6EAF937285	1	cxsmiles	JChemExcelcQAAAB+LCAAAAAAABADtvQdgHEmWJSYvbcp7f0r1StfgdKEIgGATJNiQQBDswYjN5pLsHWlHIymrKoHKZVZlXWYWQMztnbz33nvvvffee++997o7nU4n99//P1xmZAFs9s5K2smeIYCqyB8/fnwfPyK+9+3vf3my9dmXd6a71XRrukV/06/494R/53++nO7qN/LvHr1xssWvfTndm+56TTtv9v/8fwADsORkcQAAAA==
6AB11F5F8F0CBD11A1E56D6A52C116E4	1	cxsmiles	JChemExcelbwAAAB+LCAAAAAAABADtvQdgHEmWJSYvbcp7f0r1StfgdKEIgGATJNiQQBDswYjN5pLsHWlHIymrKoHKZVZlXWYWQMztnbz33nvvvffee++997o7nU4n99//P1xmZAFs9s5K2smeIYCqyB8/fnwfPyK+9+3vT3enW/Tjjv67N92a7uK3k63Pvrzz5cnelvyBf/VX+ty99KX3lQdG/t3tfPv/AH/wwLhvAAAA
17752BABFCBD7349C397DDC00739FF51	1	cxsmiles	JChemExceldAAAAB+LCAAAAAAABADtvQdgHEmWJSYvbcp7f0r1StfgdKEIgGATJNiQQBDswYjN5pLsHWlHIymrKoHKZVZlXWYWQMztnbz33nvvvffee++997o7nU4n99//P1xmZAFs9s5K2smeIYCqyB8/fnwfPyK+9+3vv9iif+6c8L9b093lcrrXTLde6wf4Z3pvKj/7/97Dv8vl7p4BwJ/uDrbf/d63v///AMuHORN0AAAA
B95605E4263F9B76CEE11F263ECC9234	1	cxsmiles	JChemExcelaQAAAB+LCAAAAAAABADtvQdgHEmWJSYvbcp7f0r1StfgdKEIgGATJNiQQBDswYjN5pLsHWlHIymrKoHKZVZlXWYWQMztnbz33nvvvffee++997o7nU4n99//P1xmZAFs9s5K2smeIYCqyB8/fnwfPyK+9+3vT3enW/TjznTL/OR/d7884V/4H/zf+/NkV35sffblHWr25cku/bI13P573/7+/wMnNo+0aQAAAA==
6B818EEA0905909EAFC2075DBAB21C0F	1	cxsmiles	JChemExcelTAAAAB+LCAAAAAAABADtvQdgHEmWJSYvbcp7f0r1StfgdKEIgGATJNiQQBDswYjN5pLsHWlHIymrKoHKZVZlXWYWQMztnbz33nvvvffee++997o7nU4n99//P1xmZAFs9s5K2smeIYCqyB8/fnwfPyK+9+3vT3eXy63t6d50i/64E/l3T/5dyp/Le/TLcnpvurt354Q/4X++9+3v/z9yw8AtTAAAAA==
BE98C6E9DA6426258719A68A56E1902A	1	cxsmiles	JChemExcelZAAAAB+LCAAAAAAABADtvQdgHEmWJSYvbcp7f0r1StfgdKEIgGATJNiQQBDswYjN5pLsHWlHIymrKoHKZVZlXWYWQMztnbz33nvvvffee++997o7nU4n99//P1xmZAFs9s5K2smeIYCqyB8/fnwfPyK+9+3vT3eXy63t6d50i/64Y/7Vn3v494R/53/kw6V8u7w33Voup/emu3t3tqe7PgBtMd393re///8AlV+oKmQAAAA=
E61638ACB6AAA15C700EE6D7A6F6EA49	1	cxsmiles	JChemExcelbQAAAB+LCAAAAAAABADtvQdgHEmWJSYvbcp7f0r1StfgdKEIgGATJNiQQBDswYjN5pLsHWlHIymrKoHKZVZlXWYWQMztnbz33nvvvffee++997o7nU4n99//P1xmZAFs9s5K2smeIYCqyB8/fnwfPyK+9+3vf3my9dmXd0626Nc7W19Od6f823RLf+753392sjXd3TON8Y/3641//j91iJJpbQAAAA==
6D684F950125F040CE31EC7892E5CDC2	1	cxsmiles	JChemExcelYgAAAB+LCAAAAAAABADtvQdgHEmWJSYvbcp7f0r1StfgdKEIgGATJNiQQBDswYjN5pLsHWlHIymrKoHKZVZlXWYWQMztnbz33nvvvffee++997o7nU4n99//P1xmZAFs9s5K2smeIYCqyB8/fnwfPyK+9+3vT3eX0y36eWe6pT938e82fU5fvD7hz+SLveX0nmnb+/fecg8/l7veG9/79vf/H8YDPkViAAAA
CA32FE3BD056F380B6888A7C8DC8DEC9	1	cxsmiles	JChemExcelQwAAAB+LCAAAAAAABADtvQdgHEmWJSYvbcp7f0r1StfgdKEIgGATJNiQQBDswYjN5pLsHWlHIymrKoHKZVZlXWYWQMztnbz33nvvvffee++997o7nU4n99//P1xmZAFs9s5K2smeIYCqyB8/fnwfPyK+9+3vT3eX063pFv12R//dxb/b9Plyuvf6hD/jf062Pnux3N274330vW9///8BNUuQZEMAAAA=
9F7B4FE445C545171ADEBE57B407A427	1	cxsmiles	JChemExcelSAAAAB+LCAAAAAAABADtvQdgHEmWJSYvbcp7f0r1StfgdKEIgGATJNiQQBDswYjN5pLsHWlHIymrKoHKZVZlXWYWQMztnbz33nvvvffee++997o7nU4n99//P1xmZAFs9s5K2smeIYCqyB8/fnwfPyK+9+3vT3enW/TjjvlXf+7i3+3p7nI53Xt9wp/xPydbn71Y7u7d8T763re///8AVNfVk0gAAAA=
628436BDE4B57D6BFB2D72039F434284	1	cxsmiles	JChemExcelTQAAAB+LCAAAAAAABADtvQdgHEmWJSYvbcp7f0r1StfgdKEIgGATJNiQQBDswYjN5pLsHWlHIymrKoHKZVZlXWYWQMztnbz33nvvvffee++997o7nU4n99//P1xmZAFs9s5K2smeIYCqyB8/fnwfPyK+9+3vT3enW/TjjvlXf+7i3+3p7nI53WumW8vl7h7+DNuelOZXNP9/AFVXQ9xNAAAA
516E1FB4C6A66CB66B3575B542B19897	1	cxsmiles	JChemExcelUQAAAB+LCAAAAAAABADtvQdgHEmWJSYvbcp7f0r1StfgdKEIgGATJNiQQBDswYjN5pLsHWlHIymrKoHKZVZlXWYWQMztnbz33nvvvffee++997o7nU4n99//P1xmZAFs9s5K2smeIYCqyB8/fnwfPyK+9+3vfzndnW7RzzvBv3vTrS9P+Ff+p/f91snWZ1/e6bbY3ft/AIpoy3NRAAAA
098CEEA2FC54E7CA159F29EADFDC44F7	1	cxsmiles	JChemExcelgwAAAB+LCAAAAAAABADtvQdgHEmWJSYvbcp7f0r1StfgdKEIgGATJNiQQBDswYjN5pLsHWlHIymrKoHKZVZlXWYWQMztnbz33nvvvffee++997o7nU4n99//P1xmZAFs9s5K2smeIYCqyB8/fnwfPyK+9+3vT3enW/TjznTv5N5nJ1snW599eefL6d50a7r75Ql/I5/p7/gH/7/1nwO/3jNt/x+iJf2KgwAAAA==
A3D3684CE08400CE5D0626B6FE5D9BBD	1	cxsmiles	JChemExcelZwAAAB+LCAAAAAAABADtvQdgHEmWJSYvbcp7f0r1StfgdKEIgGATJNiQQBDswYjN5pLsHWlHIymrKoHKZVZlXWYWQMztnbz33nvvvffee++997o7nU4n99//P1xmZAFs9s5K2smeIYCqyB8/fnwfPyK+9+3vT3eXy+nW65Mt+v0O/zPdW07vTeXX4N/lvekefvPa4v/L3e3pbqw9/7v7vW9///8BDpyzCWcAAAA=
7BD529B8F6130A9ED3A002EA4E540D9A	1	cxsmiles	JChemExcelLAAAAB+LCAAAAAAABADtvQdgHEmWJSYvbcp7f0r1StfgdKEIgGATJNiQQBDswYjN5pLsHWlHIymrKoHKZVZlXWYWQMztnbz33nvvvffee++997o7nU4n99//P1xmZAFs9s5K2smeIYCqyB8/fnwfPyK+9+3vT3eb6d5yem+6RX/cifx7b7k33f3et7///wAk6Q8oLAAAAA==
F86A6435A4B4AC124B21C0D77D2E9994	1	cxsmiles	JChemExcelNgAAAB+LCAAAAAAABADtvQdgHEmWJSYvbcp7f0r1StfgdKEIgGATJNiQQBDswYjN5pLsHWlHIymrKoHKZVZlXWYWQMztnbz33nvvvffee++997o7nU4n99//P1xmZAFs9s5K2smeIYCqyB8/fnwfPyK+9+3vT3eb6dZ0i367M93Fv9vL3eV0Tz/p/7u33P1/ABubqKI2AAAA
1901553025E819333F9403094029A04F	1	cxsmiles	JChemExcelUQAAAB+LCAAAAAAABADtvQdgHEmWJSYvbcp7f0r1StfgdKEIgGATJNiQQBDswYjN5pLsHWlHIymrKoHKZVZlXWYWQMztnbz33nvvvffee++997o7nU4n99//P1xmZAFs9s5K2smeIYCqyB8/fnwfPyK+9+3vT3eX073ldGu6RX/cmW4t95a7d074j62TH39xZ7prvun9u4t/tSn++d63v///AA6NGoZRAAAA
A17A10D38FDB6FB3709942D5A833BDE1	1	cxsmiles	JChemExcelPAAAAB+LCAAAAAAABADtvQdgHEmWJSYvbcp7f0r1StfgdKEIgGATJNiQQBDswYjN5pLsHWlHIymrKoHKZVZlXWYWQMztnbz33nvvvffee++997o7nU4n99//P1xmZAFs9s5K2smeIYCqyB8/fnwfPyK+9+3vT3eX0y36eWe6tZzu4pdt+og+e33CH/M/+P9yN/zg/wE85cBDPAAAAA==
7D10610C8C616D945164FEBAC9FED56E	1	cxsmiles	JChemExcelhAAAAB+LCAAAAAAABADtvQdgHEmWJSYvbcp7f0r1StfgdKEIgGATJNiQQBDswYjN5pLsHWlHIymrKoHKZVZlXWYWQMztnbz33nvvvffee++997o7nU4n99//P1xmZAFs9s5K2smeIYCqyB8/fnwfPyK+9+3vT3enW/TjznTL/PzyhH/hf/iT3e4nJ7ufyScnW599eWe6N92q6PW9k96rn53sSrPw9eDP/wdtZ1vthAAAAA==
978E5D3DA0B96B69E3C0A46AB09FB911	1	cxsmiles	JChemExcelRwAAAB+LCAAAAAAABADtvQdgHEmWJSYvbcp7f0r1StfgdKEIgGATJNiQQBDswYjN5pLsHWlHIymrKoHKZVZlXWYWQMztnbz33nvvvffee++997o7nU4n99//P1xmZAFs9s5K2smeIYCqyB8/fnwfPyK+9+3vf3my9dmXd6a70y36485060v54f27u+2+7bfZ/d63v///AKj/wUdHAAAA
167718F1A1514D4FC788CB748912B6C0	1	cxsmiles	JChemExcelOAAAAB+LCAAAAAAABADtvQdgHEmWJSYvbcp7f0r1StfgdKEIgGATJNiQQBDswYjN5pLsHWlHIymrKoHKZVZlXWYWQMztnbz33nvvvffee++997o7nU4n99//P1xmZAFs9s5K2smeIYCqyB8/fnwfPyK+9+3vv9ia7i6X061m9872dHe6RR/dkX+X+scu/j3h3/mf7337+/8P5xq0NjgAAAA=
E73737ECE29D01E2772B89F8DCB81E91	1	cxsmiles	JChemExcelVQAAAB+LCAAAAAAABADtvQdgHEmWJSYvbcp7f0r1StfgdKEIgGATJNiQQBDswYjN5pLsHWlHIymrKoHKZVZlXWYWQMztnbz33nvvvffee++997o7nU4n99//P1xmZAFs9s5K2smeIYCqyB8/fnwfPyK+9+3vT3eb6d5yOd16fbJFf97hf6b3pvxzKT/033v80d50d3u6G3yx9cz8tvu9b3///wGiWo9NVQAAAA==
3CE47A940A9FD59B72BCE167AB0AF4E3	1	cxsmiles	JChemExcelXAAAAB+LCAAAAAAABADtvQdgHEmWJSYvbcp7f0r1StfgdKEIgGATJNiQQBDswYjN5pLsHWlHIymrKoHKZVZlXWYWQMztnbz33nvvvffee++997o7nU4n99//P1xmZAFs9s5K2smeIYCqyB8/fnwfPyK+9+3vv9ia7k636Jc7+u9e8Ff4zS7/3F3KB8vp3nJLf5/u7t054d/4n+99+/v/D5lmYGlcAAAA
5B046DEFBE15966D9A1D78D13510CFD0	1	cxsmiles	JChemExcelhAAAAB+LCAAAAAAABADtvQdgHEmWJSYvbcp7f0r1StfgdKEIgGATJNiQQBDswYjN5pLsHWlHIymrKoHKZVZlXWYWQMztnbz33nvvvffee++997o7nU4n99//P1xmZAFs9s5K2smeIYCqyB8/fnwfPyK+9+3vv9g62frsyzvT3ekW/XVH/91b+n8up3vTXf4zbOX/u/ti94R/439u/nWXf3zv29//fwB66CYShAAAAA==
D493C58023EF48DB51118C5DD372A8A9	1	cxsmiles	JChemExcelTwAAAB+LCAAAAAAABADtvQdgHEmWJSYvbcp7f0r1StfgdKEIgGATJNiQQBDswYjN5pLsHWlHIymrKoHKZVZlXWYWQMztnbz33nvvvffee++997o7nU4n99//P1xmZAFs9s5K2smeIYCqyB8/fnwfPyK+9+3vT3enW/Tjjv67t9S/ltO96S5+3Z7u4ne/UfCC/kTb/wedg/bwTwAAAA==
594CD9DAAC91D40992B0D3E4DDBA515B	1	cxsmiles	JChemExcelVwAAAB+LCAAAAAAABADtvQdgHEmWJSYvbcp7f0r1StfgdKEIgGATJNiQQBDswYjN5pLsHWlHIymrKoHKZVZlXWYWQMztnbz33nvvvffee++997o7nU4n99//P1xmZAFs9s5K2smeIYCqyB8/fnwfPyK+9+3vfzndnW7RzzvBv3vTrS9Ptj778s70XuRb+ffewOe7e/8PXTAwx1cAAAA=
970F276E380A2449E7A645F462C7E113	1	cxsmiles	JChemExcelWwAAAB+LCAAAAAAABADtvQdgHEmWJSYvbcp7f0r1StfgdKEIgGATJNiQQBDswYjN5pLsHWlHIymrKoHKZVZlXWYWQMztnbz33nvvvffee++997o7nU4n99//P1xmZAFs9s5K2smeIYCqyB8/fnwfPyK+9+3vf3my9dmXd6a71XSL/rqj/+6e8E/+58vpbvDdFv23i9+8Nv0//x8VacwdWwAAAA==
C2E89C5E4E0C3161A7FBBFE03C660B78	1	cxsmiles	JChemExcelWwAAAB+LCAAAAAAABADtvQdgHEmWJSYvbcp7f0r1StfgdKEIgGATJNiQQBDswYjN5pLsHWlHIymrKoHKZVZlXWYWQMztnbz33nvvvffee++997o7nU4n99//P1xmZAFs9s5K2smeIYCqyB8/fnwfPyK+9+3vfzndnW7RzzvTrS9P+Bf+Rz7hf/fo88433b+9P0+2PvvyznR37/8BhIQEX1sAAAA=
9D58229CD4D3B42B1B571B7F09BD9409	1	cxsmiles	JChemExcelQwAAAB+LCAAAAAAABADtvQdgHEmWJSYvbcp7f0r1StfgdKEIgGATJNiQQBDswYjN5pLsHWlHIymrKoHKZVZlXWYWQMztnbz33nvvvffee++997o7nU4n99//P1xmZAFs9s5K2smeIYCqyB8/fnwfPyK+9+3vT3enW/TjznRvSc/ecrr7erq7nG7pp1vL3Tsn/Cv/g/+Hf/4/FHNd7kMAAAA=
DE9611037D04810C5638711415991D8B	1	cxsmiles	JChemExcelSQAAAB+LCAAAAAAABADtvQdgHEmWJSYvbcp7f0r1StfgdKEIgGATJNiQQBDswYjN5pLsHWlHIymrKoHKZVZlXWYWQMztnbz33nvvvffee++997o7nU4n99//P1xmZAFs9s5K2smeIYCqyB8/fnwfPyK+9+3vT3er6dZ0i367M93Fvydbn31558vprn4m/+4Ff4Xf4K3/B2m6kM9JAAAA
0EFF2416607A7247480A0F408962A4EB	1	cxsmiles	JChemExceldQAAAB+LCAAAAAAABADtvQdgHEmWJSYvbcp7f0r1StfgdKEIgGATJNiQQBDswYjN5pLsHWlHIymrKoHKZVZlXWYWQMztnbz33nvvvffee++997o7nU4n99//P1xmZAFs9s5K2smeIYCqyB8/fnwfPyK+9+3vT3eX0y36eWe693p6T3/t/3vvxdZ0b7qL30/4k63hX19seX90vvvet7///wCUU2ZedQAAAA==
DF6ABABAA5DD1AF53932AB646C153E2A	1	cxsmiles	JChemExcelZgAAAB+LCAAAAAAABADtvQdgHEmWJSYvbcp7f0r1StfgdKEIgGATJNiQQBDswYjN5pLsHWlHIymrKoHKZVZlXWYWQMztnbz33nvvvffee++997o7nU4n99//P1xmZAFs9s5K2smeIYCqyB8/fnwfPyK+9+3vf3my9dmXd0626Nc7W19Od6f8m/67R1/KV9zqy+nedJe/CJv5/+5KawaHf7737e//PzU+HTBmAAAA
58E324A3E37849C7F4BDE188A423DB55	1	cxsmiles	JChemExcelJAAAAB+LCAAAAAAABADtvQdgHEmWJSYvbcp7f0r1StfgdKEIgGATJNiQQBDswYjN5pLsHWlHIymrKoHKZVZlXWYWQMztnbz33nvvvffee++997o7nU4n99//P1xmZAFs9s5K2smeIYCqyB8/fnwfPyK+9+3vT3enW/Tjjv67N91qpveW9OzduzPd/d63v///AG451GUkAAAA
F27D6735942B80DB2331651CF0E2D540	1	cxsmiles	JChemExcelSAAAAB+LCAAAAAAABADtvQdgHEmWJSYvbcp7f0r1StfgdKEIgGATJNiQQBDswYjN5pLsHWlHIymrKoHKZVZlXWYWQMztnbz33nvvvffee++997o7nU4n99//P1xmZAFs9s5K2smeIYCqyB8/fnwfPyK+9+3vT3eXy+ne9N50f7rVTO8tp1v04Z3l7t6dE/6N/xn4dZ9/fO/b3/9/AHW3Gu1IAAAA
668B5EE5229F822B18C97F16DA3C4B2B	1	cxsmiles	JChemExcelbAAAAB+LCAAAAAAABADtvQdgHEmWJSYvbcp7f0r1StfgdKEIgGATJNiQQBDswYjN5pLsHWlHIymrKoHKZVZlXWYWQMztnbz33nvvvffee++997o7nU4n99//P1xmZAFs9s5K2smeIYCqyB8/fnwfPyK+9+3vT3enW/TjznJvurVcTvfkr+nuCf/kf/B/70/v1+mu98qW+cngdvf8ht/79vf/H/oMkhRsAAAA
CA2E3D816F10815EE15BA7EFCD50FCC7	1	cxsmiles	JChemExcelMAAAAB+LCAAAAAAABADtvQdgHEmWJSYvbcp7f0r1StfgdKEIgGATJNiQQBDswYjN5pLsHWlHIymrKoHKZVZlXWYWQMztnbz33nvvvffee++997o7nU4n99//P1xmZAFs9s5K2smeIYCqyB8/fnwfPyK+9+3vT3eXy73lcjndW053t6e70y368E7k393vffv7/w8RCJZYMAAAAA==
C9558F50E7576747D993974079668273	1	cxsmiles	JChemExcelRgAAAB+LCAAAAAAABADtvQdgHEmWJSYvbcp7f0r1StfgdKEIgGATJNiQQBDswYjN5pLsHWlHIymrKoHKZVZlXWYWQMztnbz33nvvvffee++997o7nU4n99//P1xmZAFs9s5K2smeIYCqyB8/fnwfPyK+9+3vT3enW/TjjvlXf+7i3+3p7pL/XE73wlbev7t7/w9hSe6zRgAAAA==
C5E0A947FDA25E9599D6839C963263EF	1	cxsmiles	JChemExcelSwAAAB+LCAAAAAAABADtvQdgHEmWJSYvbcp7f0r1StfgdKEIgGATJNiQQBDswYjN5pLsHWlHIymrKoHKZVZlXWYWQMztnbz33nvvvffee++997o7nU4n99//P1xmZAFs9s5K2smeIYCqyB8/fnwfPyK+9+3vT3enW/Tjjvy73JtuLZfTveku/jrhz+TrXf7Yaxq8trv3/wA0KohYSwAAAA==
AF6FF2A99BF4D70E01F457D7FD3691E8	1	cxsmiles	JChemExcelXAAAAB+LCAAAAAAABADtvQdgHEmWJSYvbcp7f0r1StfgdKEIgGATJNiQQBDswYjN5pLsHWlHIymrKoHKZVZlXWYWQMztnbz33nvvvffee++997o7nU4n99//P1xmZAFs9s5K2smeIYCqyB8/fnwfPyK+9+3vn+x+drL15XRvuvXlyRb9fYf/wf9jn3j/7tGbX96Z7vofLvWP3e99+/v/D5D87xpcAAAA
E7E1B01FA1F12D7D565E9872755CD2FE	1	cxsmiles	JChemExcelbQAAAB+LCAAAAAAABADtvQdgHEmWJSYvbcp7f0r1StfgdKEIgGATJNiQQBDswYjN5pLsHWlHIymrKoHKZVZlXWYWQMztnbz33nvvvffee++997o7nU4n99//P1xmZAFs9s5K2smeIYCqyB8/fnwfPyK+9+3vf3my9dmXd6a70y36407k390T/ql/hA2+9L7jT/aGwez9P9Ph3ddtAAAA
1E3048385CEAC368BBA4A2AF8572F743	1	cxsmiles	JChemExcelRAAAAB+LCAAAAAAABADtvQdgHEmWJSYvbcp7f0r1StfgdKEIgGATJNiQQBDswYjN5pLsHWlHIymrKoHKZVZlXWYWQMztnbz33nvvvffee++997o7nU4n99//P1xmZAFs9s5K2smeIYCqyB8/fnwfPyK+9+3vn+x+drI13Ztu0e93pltfnvAv/I984v279yW1/vJO2OT/Aa9JuUREAAAA
93BB4BF8040CAE0BCC25B133748A360B	1	cxsmiles	JChemExcelWQAAAB+LCAAAAAAABADtvQdgHEmWJSYvbcp7f0r1StfgdKEIgGATJNiQQBDswYjN5pLsHWlHIymrKoHKZVZlXWYWQMztnbz33nvvvffee++997o7nU4n99//P1xmZAFs9s5K2smeIYCqyB8/fnwfPyK+9+3vfzndnW7RzzvTrenWl/IL/7u77b7Rz803/OcJ/8H/9P/8fwCvMDw6WQAAAA==
5BD0753509DC994929DA28397F6E6C01	1	cxsmiles	JChemExcelTgAAAB+LCAAAAAAABADtvQdgHEmWJSYvbcp7f0r1StfgdKEIgGATJNiQQBDswYjN5pLsHWlHIymrKoHKZVZlXWYWQMztnbz33nvvvffee++997o7nU4n99//P1xmZAFs9s5K2smeIYCqyB8/fnwfPyK+9+3vT3enW/TjjvlXf+7i3+3p7nK5N91aLqd7zS7+DNt6/6L9/wNqLhstTgAAAA==
CC1919E19470C4EE068893729A3F2118	1	cxsmiles	JChemExcelTAAAAB+LCAAAAAAABADtvQdgHEmWJSYvbcp7f0r1StfgdKEIgGATJNiQQBDswYjN5pLsHWlHIymrKoHKZVZlXWYWQMztnbz33nvvvffee++997o7nU4n99//P1xmZAFs9s5K2smeIYCqyB8/fnwfPyK+9+3vf3my+9nJ1pfTvekW/XUn8u8etfjyznQ3/OpL/8fu9779/f8HDGtdjkwAAAA=
F399FBC20B4FC3558DD2D43F0A8E38D4	1	cxsmiles	JChemExcelPwAAAB+LCAAAAAAABADtvQdgHEmWJSYvbcp7f0r1StfgdKEIgGATJNiQQBDswYjN5pLsHWlHIymrKoHKZVZlXWYWQMztnbz33nvvvffee++997o7nU4n99//P1xmZAFs9s5K2smeIYCqyB8/fnwfPyK+9+3vn+x+drJ1skf/fEm/fnnnZIs+vMN/7tk/+R/8P/zz/wH3ttRsPwAAAA==
493464169E1ABF29695C7AFF37DF7072	1	cxsmiles	JChemExcelWgAAAB+LCAAAAAAABADtvQdgHEmWJSYvbcp7f0r1StfgdKEIgGATJNiQQBDswYjN5pLsHWlHIymrKoHKZVZlXWYWQMztnbz33nvvvffee++997o7nU4n99//P1xmZAFs9s5K2smeIYCqyB8/fnwfPyK+9+3vT3er6d50i367o//eO9n67Ms7J1tfnvDf/A/+/xl9NL1HjXe52W7wkv8vvv9/AGv5y2BaAAAA
4F5F4D24E34614BE6236E4A39862E310	1	cxsmiles	JChemExceleQAAAB+LCAAAAAAABADtvQdgHEmWJSYvbcp7f0r1StfgdKEIgGATJNiQQBDswYjN5pLsHWlHIymrKoHKZVZlXWYWQMztnbz33nvvvffee++997o7nU4n99//P1xmZAFs9s5K2smeIYCqyB8/fnwfPyK+9+3vT3eX072Trc++vDO9N92iD+5Mt7484V/4n6FP+N9723jp1s23prv8c+/e/wO2vu7MeQAAAA==
3D54259F2DD9AF645DE5D80CA3577F5B	1	cxsmiles	JChemExcelZwAAAB+LCAAAAAAABADtvQdgHEmWJSYvbcp7f0r1StfgdKEIgGATJNiQQBDswYjN5pLsHWlHIymrKoHKZVZlXWYWQMztnbz33nvvvffee++997o7nU4n99//P1xmZAFs9s5K2smeIYCqyB8/fnwfPyK+9+3vf3myRf/e2TrZ+uzLO9PdKf8V+XfXNMQ/8smt2/4/4JJJXmcAAAA=
E3DBC131F7A9AA6383DBBE7742A9C901	1	cxsmiles	JChemExcelmgAAAB+LCAAAAAAABADtvQdgHEmWJSYvbcp7f0r1StfgdKEIgGATJNiQQBDswYjN5pLsHWlHIymrKoHKZVZlXWYWQMztnbz33nvvvffee++997o7nU4n99//P1xmZAFs9s5K2smeIYCqyB8/fnwfPyK+9+3vT3enW/Tjjv67N92a7uK3F1udb/x/d0/2tk74V/4H/x/+M/7ri80A/h/dIGgOmgAAAA==
EC968531A22CB540DD199F8725C73CAA	1	cxsmiles	JChemExcelTwAAAB+LCAAAAAAABADtvQdgHEmWJSYvbcp7f0r1StfgdKEIgGATJNiQQBDswYjN5pLsHWlHIymrKoHKZVZlXWYWQMztnbz33nvvvffee++997o7nU4n99//P1xmZAFs9s5K2smeIYCqyB8/fnwfPyK+9+3vf3my+9nJ3snWZ1/eOdmiv+98Jj/MH3tf0ncnu/hjujvlD82/X/o/0OL/Aa/kD4VPAAAA
59D96490975808F418B6AB957ACB600B	1	cxsmiles	JChemExcelPwAAAB+LCAAAAAAABADtvQdgHEmWJSYvbcp7f0r1StfgdKEIgGATJNiQQBDswYjN5pLsHWlHIymrKoHKZVZlXWYWQMztnbz33nvvvffee++997o7nU4n99//P1xmZAFs9s5K2smeIYCqyB8/fnwfPyK+9+3vn+x+drJ1svXZl3dOtujPO/wP/s+ffTndm/InkX939/4fAwwZrz8AAAA=
33C4668DC89AA1FD5256925D37B82E33	1	cxsmiles	JChemExcelvwAAAB+LCAAAAAAABADtvQdgHEmWJSYvbcp7f0r1StfgdKEIgGATJNiQQBDswYjN5pLsHWlHIymrKoHKZVZlXWYWQMztnbz33nvvvffee++997o7nU4n99//P1xmZAFs9s5K2smeIYCqyB8/fnwfPyK+9+3vfzndnW7RzzvTLfzHv+2e8M8t/YF/8P/un7tbX55sffblnemegdD7d3fvjg//S/+rOPQb+gz+/H8ANJD7EL8AAAA=
E1D41DC54BB1587004FADF9277B23FB5	1	cxsmiles	JChemExcelPAAAAB+LCAAAAAAABADtvQdgHEmWJSYvbcp7f0r1StfgdKEIgGATJNiQQBDswYjN5pLsHWlHIymrKoHKZVZlXWYWQMztnbz33nvvvffee++997o7nU4n99//P1xmZAFs9s5K2smeIYCqyB8/fnwfPyK+9+3vT3eX063pFv12R//dxb/b+Hwv+Nz/d6/Z/X8Aj54ZvzwAAAA=
D7436FF2972E2908F08658A0F3B4A352	1	cxsmiles	JChemExcelMwAAAB+LCAAAAAAABADtvQdgHEmWJSYvbcp7f0r1StfgdKEIgGATJNiQQBDswYjN5pLsHWlHIymrKoHKZVZlXWYWQMztnbz33nvvvffee++997o7nU4n99//P1xmZAFs9s5K2smeIYCqyB8/fnwfPyK+9+3vf3my9dmXd052PzvZor/uTPem8rP/796X1OrL/wcOO0kaMwAAAA==
061E4D788F0C5CFA7909F2326045EECC	1	cxsmiles	JChemExcelWwAAAB+LCAAAAAAABADtvQdgHEmWJSYvbcp7f0r1StfgdKEIgGATJNiQQBDswYjN5pLsHWlHIymrKoHKZVZlXWYWQMztnbz33nvvvffee++997o7nU4n99//P1xmZAFs9s5K2smeIYCqyB8/fnwfPyK+9+3vf3my9dmXd6a70y36407k393btjjhv/if7337+/8PRXcSf1sAAAA=
FC0C3F1379A81F31A4E45CFDA5E194A9	1	cxsmiles	JChemExcelUQAAAB+LCAAAAAAABADtvQdgHEmWJSYvbcp7f0r1StfgdKEIgGATJNiQQBDswYjN5pLsHWlHIymrKoHKZVZlXWYWQMztnbz33nvvvffee++997o7nU4n99//P1xmZAFs9s5K2smeIYCqyB8/fnwfPyK+9+3vfzndnW7RzzuRf3dPtj778k63wZcn/Av/4zf+8nvf/v7/Az+Tw9NRAAAA
63BAE2A418B26B4262081A0FC186F224	1	cxsmiles	JChemExcelMgAAAB+LCAAAAAAABADtvQdgHEmWJSYvbcp7f0r1StfgdKEIgGATJNiQQBDswYjN5pLsHWlHIymrKoHKZVZlXWYWQMztnbz33nvvvffee++997o7nU4n99//P1xmZAFs9s5K2smeIYCqyB8/fnwfPyK+9+3vT3er6d50i367M7335cnWZ1/eOeG/PjvRD/XLvenu9779/f8HVyn5mzIAAAA=
E8403C31EAE9569D151744BE1E332737	1	cxsmiles	JChemExcelUAAAAB+LCAAAAAAABADtvQdgHEmWJSYvbcp7f0r1StfgdKEIgGATJNiQQBDswYjN5pLsHWlHIymrKoHKZVZlXWYWQMztnbz33nvvvffee++997o7nU4n99//P1xmZAFs9s5K2smeIYCqyB8/fnwfPyK+9+3vfzndnW7RzzvTrS9P+Bf+Rz7x/t092frsyzuucb/B9779/f8HFaY2nFAAAAA=
FBD65DDE3D6AB01BF92C89D535C627B9	1	cxsmiles	JChemExcel+gAAAB+LCAAAAAAABADtvQdgHEmWJSYvbcp7f0r1StfgdKEIgGATJNiQQBDswYjN5pLsHWlHIymrKoHKZVZlXWYWQMztnbz33nvvvffee++997o7nU4n99//P1xmZAFs9s5K2smeIYCqyB8/fnwfPyK+9+3vf3myu0U/7pzwv1tfnuwFfwZf3eNfvtS/9YfXgn+VRi/4X++7F92Gw3/23uVfBS/3nUFD2jGiPkr88a73Tvjd/wNNePq0+gAAAA==
0A75B6730ACD4E3CFBA4D3037AE3465F	1	cxsmiles	JChemExcelOQAAAB+LCAAAAAAABADtvQdgHEmWJSYvbcp7f0r1StfgdKEIgGATJNiQQBDswYjN5pLsHWlHIymrKoHKZVZlXWYWQMztnbz33nvvvffee++997o7nU4n99//P1xmZAFs9s5K2smeIYCqyB8/fnwfPyK+9+3vfzndnW7Rzzvm3xf882Trsy/pH/zK/3gtdr/37e//P1T/hls5AAAA
DEBDE7BE6AFBC3C662EFD5AFB8D1197C	1	cxsmiles	JChemExcelRAAAAB+LCAAAAAAABADtvQdgHEmWJSYvbcp7f0r1StfgdKEIgGATJNiQQBDswYjN5pLsHWlHIymrKoHKZVZlXWYWQMztnbz33nvvvffee++997o7nU4n99//P1xmZAFs9s5K2smeIYCqyB8/fnwfPyK+9+3vv9iif+7Ivyf8b/fX6e5Ufvb/3f3et7///wDR1U/SRAAAAA==
4B96FAAD3E86CE3B4484826110AE0EAC	1	cxsmiles	JChemExcelVgAAAB+LCAAAAAAABADtvQdgHEmWJSYvbcp7f0r1StfgdKEIgGATJNiQQBDswYjN5pLsHWlHIymrKoHKZVZlXWYWQMztnbz33nvvvffee++997o7nU4n99//P1xmZAFs9s5K2smeIYCqyB8/fnwfPyK+9+3vf/ly67Mv72x9Sb/eeX2yhR/8j/fri+4Hm5p979vf/38ALrj9CVYAAAA=
D80E67E6D09A6E0A4A2F3C09408B8E47	1	cxsmiles	JChemExcelYgAAAB+LCAAAAAAABADtvQdgHEmWJSYvbcp7f0r1StfgdKEIgGATJNiQQBDswYjN5pLsHWlHIymrKoHKZVZlXWYWQMztnbz33nvvvffee++997o7nU4n99//P1xmZAFs9s5K2smeIYCqyB8/fnwfPyK+9+3vv9iif+6c7O6d8C/y1z354X0iv0Y+kaYCw/26Z379fwAuq98VYgAAAA==
97AF1BB74F55517B0FE500D99AF4BD67	1	cxsmiles	JChemExcelRwAAAB+LCAAAAAAABADtvQdgHEmWJSYvbcp7f0r1StfgdKEIgGATJNiQQBDswYjN5pLsHWlHIymrKoHKZVZlXWYWQMztnbz33nvvvffee++997o7nU4n99//P1xmZAFs9s5K2smeIYCqyB8/fnwfPyK+9+3vf3my9dmXd0626Nc7Wy/4B/6vH3yJf6e7U/7L/Pul/2P3e9/+/v8DD2q0fEcAAAA=
A93EC213C8F13F236814E9D810A158A3	1	cxsmiles	JChemExcelJgAAAB+LCAAAAAAABADtvQdgHEmWJSYvbcp7f0r1StfgdKEIgGATJNiQQBDswYjN5pLsHWlHIymrKoHKZVZlXWYWQMztnbz33nvvvffee++997o7nU4n99//P1xmZAFs9s5K2smeIYCqyB8/fnwfPyK+9+3vv9iif+6c7MqPrc++vCOffKkffe/b3/9/APsGSPYmAAAA
BB4226EC803204470AB66C4988DFCDFE	1	cxsmiles	JChemExcelVwAAAB+LCAAAAAAABADtvQdgHEmWJSYvbcp7f0r1StfgdKEIgGATJNiQQBDswYjN5pLsHWlHIymrKoHKZVZlXWYWQMztnbz33nvvvffee++997o7nU4n99//P1xmZAFs9s5K2smeIYCqyB8/fnwfPyK+9+3vf3my9dmXd062XmzRH3fkX/x/64R/tX97f053p/JT//3S/7H7vW9///8BfH/qalcAAAA=
5B9FB035934F14783FED1F7F64FC19B0	1	cxsmiles	JChemExcelxwAAAB+LCAAAAAAABADtvQdgHEmWJSYvbcp7f0r1StfgdKEIgGATJNiQQBDswYjN5pLsHWlHIymrKoHKZVZlXWYWQMztnbz33nvvvffee++997o7nU4n99//P1xmZAFs9s5K2smeIYCqyB8/fnwfPyK+9+3vT3enW/TjjvlXf+7i3xdbJ/yXfhQ29P7lxl5T/fXFbv+z7q+7/KPz6Zf9xt4nncbf+/b3/x9TojVAxwAAAA==
D3A417203E6653DDF13F7599AB029637	1	cxsmiles	JChemExceldQAAAB+LCAAAAAAABADtvQdgHEmWJSYvbcp7f0r1StfgdKEIgGATJNiQQBDswYjN5pLsHWlHIymrKoHKZVZlXWYWQMztnbz33nvvvffee++997o7nU4n99//P1xmZAFs9s5K2smeIYCqyB8/fnwfPyK+9+3vT3eX0y36eWe5Nd3FzxP6KZ9E/uUWNzbY9P1J+f8Amo+GInUAAAA=
79EC5B8C399CA51579F52AB874EA33DE	1	cxsmiles	JChemExcelJwAAAB+LCAAAAAAABADtvQdgHEmWJSYvbcp7f0r1StfgdKEIgGATJNiQQBDswYjN5pLsHWlHIymrKoHKZVZlXWYWQMztnbz33nvvvffee++997o7nU4n99//P1xmZAFs9s5K2smeIYCqyB8/fnwfPyK+9+3vv9g92frsyztfTvemW/TnHfPvSWl+3d37fwCWg3IBJwAAAA==
1CB0B909B68A80983B80D5D4FDC952BD	1	cxsmiles	JChemExcelsAAAAB+LCAAAAAAABADtvQdgHEmWJSYvbcp7f0r1StfgdKEIgGATJNiQQBDswYjN5pLsHWlHIymrKoHKZVZlXWYWQMztnbz33nvvvffee++997o7nU4n99//P1xmZAFs9s5K2smeIYCqyB8/fnwfPyK+9+3vT3enW/TjjvlXf+7i3xdbJ/wX/xP/dajJ8Bv852730+leiIb37562/t63v///ALPr9t+wAAAA
2ABF21EA16D428FD1FBFE62BD85B97BB	1	cxsmiles	JChemExcelrwAAAB+LCAAAAAAABADtvQdgHEmWJSYvbcp7f0r1StfgdKEIgGATJNiQQBDswYjN5pLsHWlHIymrKoHKZVZlXWYWQMztnbz33nvvvffee++997o7nU4n99//P1xmZAFs9s5K2smeIYCqyB8/fnwfPyK+9+3vv9g62frsyzvT3ekW/XVnuvXlCf/C/9z4K/6/nO6Zd3v/7u4NvIhuhwAOfvP/AEqZasKvAAAA
24CC7362CE561B56C0E7AAA3B44C1E8D	1	cxsmiles	JChemExcelrAAAAB+LCAAAAAAABADtvQdgHEmWJSYvbcp7f0r1StfgdKEIgGATJNiQQBDswYjN5pLsHWlHIymrKoHKZVZlXWYWQMztnbz33nvvvffee++997o7nU4n99//P1xmZAFs9s5K2smeIYCqyB8/fnwfPyK+9+3vf3myRf/e4X+8X1/sDny+Ff/cb7I3vTfl3yL/3nvd/VJ/7t0jGM/u0P+eBXB3+cf3vv39/wfIvKhIrAAAAA==
4D5D2866B2C82720FCC3DEB4B0D88366	1	cxsmiles	JChemExcel0QAAAB+LCAAAAAAABADtvQdgHEmWJSYvbcp7f0r1StfgdKEIgGATJNiQQBDswYjN5pLsHWlHIymrKoHKZVZlXWYWQMztnbz33nvvvffee++997o7nU4n99//P1xmZAFs9s5K2smeIYCqyB8/fnwfPyK+9+3vf3myuzXdm27Rr3fMvyel+XUP/57w71udX19sxT8/oc8/+zL8utOEf+l26v27J/9u/t7vcteA/X8AyXYbzNEAAAA=
40EA093B97FEC6562CE9E42FF78D1A07	1	cxsmiles	JChemExcelhgAAAB+LCAAAAAAABADtvQdgHEmWJSYvbcp7f0r1StfgdKEIgGATJNiQQBDswYjN5pLsHWlHIymrKoHKZVZlXWYWQMztnbz33nvvvffee++997o7nU4n99//P1xmZAFs9s5K2smeIYCqyB8/fnwfPyK+9+3vT3enW/Tjjvn3yxP+hf/RX19seZ9N98L23r973jvdX0v/L++d3e99+/v/D3rkwh+GAAAA
4BD2E0F20021929879A5831C21B948A8	1	cxsmiles	JChemExcelNAAAAB+LCAAAAAAABADtvQdgHEmWJSYvbcp7f0r1StfgdKEIgGATJNiQQBDswYjN5pLsHWlHIymrKoHKZVZlXWYWQMztnbz33nvvvffee++997o7nU4n99//P1xmZAFs9s5K2smeIYCqyB8/fnwfPyK+9+3vv9iif+683vrsyzv4/3R3uZxuNbt35PMTfHbCv/I/3/v29/8fEMmHCzQAAAA=
E53B07D72A31395781EBB28E02673762	1	cxsmiles	JChemExcelcgAAAB+LCAAAAAAABADtvQdgHEmWJSYvbcp7f0r1StfgdKEIgGATJNiQQBDswYjN5pLsHWlHIymrKoHKZVZlXWYWQMztnbz33nvvvffee++997o7nU4n99//P1xmZAFs9s5K2smeIYCqyB8/fnwfPyK+9+3vv9iif+683vrsyzv4/3R3yh9M96ZbLz472dKv9/Ad/e+E/5TPvN/Rmn/2/93zft89Kf8f8+T2+HIAAAA=
CA69D562A70E615E5F2E9DB667476D41	1	cxsmiles	JChemExceljAAAAB+LCAAAAAAABADtvQdgHEmWJSYvbcp7f0r1StfgdKEIgGATJNiQQBDswYjN5pLsHWlHIymrKoHKZVZlXWYWQMztnbz33nvvvffee++997o7nU4n99//P1xmZAFs9s5K2smeIYCqyB8/fnwfPyK+9+3vv9iif+683vrsyzv4/3S3me5Nt6a7+PSEv9uSJvpH59fOny+24s28X7/svP16D/1+9uX/A/+wKp6MAAAA
50C9FDB50400BC27EF529DD790F8882C	1	cxsmiles	JChemExcelPwAAAB+LCAAAAAAABADtvQdgHEmWJSYvbcp7f0r1StfgdKEIgGATJNiQQBDswYjN5pLsHWlHIymrKoHKZVZlXWYWQMztnbz33nvvvffee++997o7nU4n99//P1xmZAFs9s5K2smeIYCqyB8/fnwfPyK+9+3vv9iif+683vrsyzv4/3R3yh9M96ZbLz474d+1yR6+RxNpsHtS/j+z6TZqPwAAAA==
41FA60D7BC1C180CA93F09DB8E433D02	1	cxsmiles	JChemExcelfAAAAB+LCAAAAAAABADtvQdgHEmWJSYvbcp7f0r1StfgdKEIgGATJNiQQBDswYjN5pLsHWlHIymrKoHKZVZlXWYWQMztnbz33nvvvffee++997o7nU4n99//P1xmZAFs9s5K2smeIYCqyB8/fnwfPyK+9+3vv9iif+683vrsyzv4/3R3yh9M96Zb8tUJ/6t/vN5DI/rfyZ7/Jf96z/vkM/lhWslXDFeg756U/w+cJs2lfAAAAA==
A502395986B6190CBEDCC972BF786CAF	1	cxsmiles	JChemExcelPgAAAB+LCAAAAAAABADtvQdgHEmWJSYvbcp7f0r1StfgdKEIgGATJNiQQBDswYjN5pLsHWlHIymrKoHKZVZlXWYWQMztnbz33nvvvffee++997o7nU4n99//P1xmZAFs9s5K2smeIYCqyB8/fnwfPyK+9+3vv9iif+683vrsyzv4/3R3yh9Mt05K8890N2gib3zv29//fwDDRMluPgAAAA==
90EE8EFC952EE72959782DA8717ABC23	1	cxsmiles	JChemExcelbwAAAB+LCAAAAAAABADtvQdgHEmWJSYvbcp7f0r1StfgdKEIgGATJNiQQBDswYjN5pLsHWlHIymrKoHKZVZlXWYWQMztnbz33nvvvffee++997o7nU4n99//P1xmZAFs9s5K2smeIYCqyB8/fnwfPyK+9+3vv9iif+683vrsyzv4/3S3me5Nt6a7+PSEv9uSJvpH59f4N50Gr/cA+rMv/x/MizTHbwAAAA==
C1D55058614827B7785B3DD0D9782857	1	cxsmiles	JChemExcelSgAAAB+LCAAAAAAABADtvQdgHEmWJSYvbcp7f0r1StfgdKEIgGATJNiQQBDswYjN5pLsHWlHIymrKoHKZVZlXWYWQMztnbz33nvvvffee++997o7nU4n99//P1xmZAFs9s5K2smeIYCqyB8/fnwfPyK+9+3vv9iif+683vrsyzv4/3R3Od2b8mfm3y9P+Bf+x/vVa7LX7P4/StvYv0oAAAA=
4D079428E94DF446F7FF5CB599A2DE80	1	cxsmiles	JChemExcelWAAAAB+LCAAAAAAABADtvQdgHEmWJSYvbcp7f0r1StfgdKEIgGATJNiQQBDswYjN5pLsHWlHIymrKoHKZVZlXWYWQMztnbz33nvvvffee++997o7nU4n99//P1xmZAFs9s5K2smeIYCqyB8/fnwfPyK+9+3vf3my9dmXd6a70y364850a7p1Ut7RP3Zf8M8T/lc/qkxD+RP/vgYE/F+af+/b3/9/AFdTdjlYAAAA
448FB9B6880EB190F3EC00510312ECB9	1	cxsmiles	JChemExcelSAAAAB+LCAAAAAAABADtvQdgHEmWJSYvbcp7f0r1StfgdKEIgGATJNiQQBDswYjN5pLsHWlHIymrKoHKZVZlXWYWQMztnbz33nvvvffee++997o7nU4n99//P1xmZAFs9s5K2smeIYCqyB8/fnwfPyK+9+3vv9iif+683vrsyzv4/3R3yh9M96Zb8tUJ/8v/aNs9NERbabl7Uv4/AnXMBUgAAAA=
3E5C83FF4E54638CB94DFC9327CCD328	1	cxsmiles	JChemExcelTgAAAB+LCAAAAAAABADtvQdgHEmWJSYvbcp7f0r1StfgdKEIgGATJNiQQBDswYjN5pLsHWlHIymrKoHKZVZlXWYWQMztnbz33nvvvffee++997o7nU4n99//P1xmZAFs9s5K2smeIYCqyB8/fnwfPyK+9+3vv9iif+683vrsyzv4/3R3yh9M96Zb8tUJ/8v/aNs9NERbabl7svXsDv3v2f8DwQSUmE4AAAA=
8A2295DCFB0D84CB6363DB0D6E4CA757	1	cxsmiles	JChemExcelQQAAAB+LCAAAAAAABADtvQdgHEmWJSYvbcp7f0r1StfgdKEIgGATJNiQQBDswYjN5pLsHWlHIymrKoHKZVZlXWYWQMztnbz33nvvvffee++997o7nU4n99//P1xmZAFs9s5K2smeIYCqyB8/fnwfPyK+9+3vv9iif+683vrsyzv4/8nuZy9ebJ1svd6989mLE/6EG/A/+H/45/8DIlFrkUEAAAA=
2DBB139E5EEB8EAAB4EEAF2FC212A684	1	cxsmiles	JChemExcelXQAAAB+LCAAAAAAABADtvQdgHEmWJSYvbcp7f0r1StfgdKEIgGATJNiQQBDswYjN5pLsHWlHIymrKoHKZVZlXWYWQMztnbz33nvvvffee++997o7nU4n99//P1xmZAFs9s5K2smeIYCqyB8/fnwfPyK+9+3vv9iif+683vrsyzv4/3R3yh9M96Zb8tUJ/0t/6C/4h1/ZQ3v6n/f5SXlHX989Kf8fdAOM2F0AAAA=
91082875698570426C6D1E59EE9F0347	1	cxsmiles	JChemExcelWgAAAB+LCAAAAAAABADtvQdgHEmWJSYvbcp7f0r1StfgdKEIgGATJNiQQBDswYjN5pLsHWlHIymrKoHKZVZlXWYWQMztnbz33nvvvffee++997o7nU4n99//P1xmZAFs9s5K2smeIYCqyB8/fnwfPyK+9+3vv9iif+683vrsyzv4/3R3yh9M907wp3x7wv9uvdBvtMXuSWm+8Rrhn+99+/v/D9NcVuZaAAAA
C1813A5266F69E3E88842D78DE4AD6A4	1	cxsmiles	JChemExcelTwAAAB+LCAAAAAAABADtvQdgHEmWJSYvbcp7f0r1StfgdKEIgGATJNiQQBDswYjN5pLsHWlHIymrKoHKZVZlXWYWQMztnbz33nvvvffee++997o7nU4n99//P1xmZAFs9s5K2smeIYCqyB8/fnwfPyK+9+3vn/z4ycnu1pcnW599eefFFn1wB/8/4d+2bvfrrnnt/wEMJGu0TwAAAA==
C036817F1537A456EFB2F5509D409958	1	cxsmiles	JChemExceliQAAAB+LCAAAAAAABADtvQdgHEmWJSYvbcp7f0r1StfgdKEIgGATJNiQQBDswYjN5pLsHWlHIymrKoHKZVZlXWYWQMztnbz33nvvvffee++997o7nU4n99//P1xmZAFs9s5K2smeIYCqyB8/fnwfPyK+9+3vv9iif+683vrsyzv4/5cn/Df/c7K7R39+ebKrf/EP/xPX9Mu9O1ven51v+ZeNX/8/iE9f3IkAAAA=
DA8A66C86442FFF5C253AC2040EFCA01	1	cxsmiles	JChemExcelUQAAAB+LCAAAAAAABADtvQdgHEmWJSYvbcp7f0r1StfgdKEIgGATJNiQQBDswYjN5pLsHWlHIymrKoHKZVZlXWYWQMztnbz33nvvvffee++997o7nU4n99//P1xmZAFs9s5K2smeIYCqyB8/fnwfPyK+9+3vv9iif+683vrsyzv4/3R3yh9M96Zb8tUJ/6t/vN5DI/qffnpS3qH/6Su7J+X/A4i9aD9RAAAA
34D3FC0773ED72EDC1D8C56CB1650ADF	1	cxsmiles	JChemExcelPgAAAB+LCAAAAAAABADtvQdgHEmWJSYvbcp7f0r1StfgdKEIgGATJNiQQBDswYjN5pLsHWlHIymrKoHKZVZlXWYWQMztnbz33nvvvffee++997o7nU4n99//P1xmZAFs9s5K2smeIYCqyB8/fnwfPyK+9+3vv9iif+683vrsyzv4/wn/yf9Md5fVdG8qv/f/3d37fwAPFxomPgAAAA==
8C007EAF59C4CE0D428ADDCD701AC331	1	cxsmiles	JChemExcelwwAAAB+LCAAAAAAABADtvQdgHEmWJSYvbcp7f0r1StfgdKEIgGATJNiQQBDswYjN5pLsHWlHIymrKoHKZVZlXWYWQMztnbz33nvvvffee++997o7nU4n99//P1xmZAFs9s5K2smeIYCqyB8/fnwfPyK+9+3vf3mydbL12Zd3vjzZ3aI/75zwv/zP91588v29Le+D+K9fTu9N+ZfIv/eGX+v3d7In3eLv6W4TANqVf/sf/j90RXBawwAAAA==
62DA81C8CA10C88DBE43927F4C7B65D1	1	cxsmiles	JChemExcelbQAAAB+LCAAAAAAABADtvQdgHEmWJSYvbcp7f0r1StfgdKEIgGATJNiQQBDswYjN5pLsHWlHIymrKoHKZVZlXWYWQMztnbz33nvvvffee++997o7nU4n99//P1xmZAFs9s5K2smeIYCqyB8/fnwfPyK+9+3vfzndnW7RzzvTrS/lh/w73cXPE/5LvtHf8c+LLfnA+4h/6fwd/vn/AEDzp09tAAAA
C839AE87ED9DC7F1AF918F8F03F22B90	1	cxsmiles	JChemExcelrwAAAB+LCAAAAAAABADtvQdgHEmWJSYvbcp7f0r1StfgdKEIgGATJNiQQBDswYjN5pLsHWlHIymrKoHKZVZlXWYWQMztnbz33nvvvffee++997o7nU4n99//P1xmZAFs9s5K2smeIYCqyB8/fnwfPyK+9+3vf3myRf/e2ZruTvmX6RZ98tmXd15s6Rf4B//v/PmerXc7H77Ykg867TaD+X8APYFpra8AAAA=
29BF9E5F94B59546053D7DCCBB87FE3F	1	cxsmiles	JChemExcellQAAAB+LCAAAAAAABADtvQdgHEmWJSYvbcp7f0r1StfgdKEIgGATJNiQQBDswYjN5pLsHWlHIymrKoHKZVZlXWYWQMztnbz33nvvvffee++997o7nU4n99//P1xmZAFs9s5K2smeIYCqyB8/fnwfPyK+9+3vf3myu3WyRb/c4X8Gft3lH96nJ1uffXnny3jrFz7Aznf4/3R3yr9H/t393re///8AsBS2VZUAAAA=
C3C41421826E5D6B9F4379343773B26E	1	cxsmiles	JChemExceleAAAAB+LCAAAAAAABADtvQdgHEmWJSYvbcp7f0r1StfgdKEIgGATJNiQQBDswYjN5pLsHWlHIymrKoHKZVZlXWYWQMztnbz33nvvvffee++997o7nU4n99//P1xmZAFs9s5K2smeIYCqyB8/fnwfPyK+9+3vn2zRP3f4nxe73h/+51snW599yT9iX3f+3PDNrvn0/wE0h34LeAAAAA==
22680E4309CFF9C8E717570C9F0828F2	1	cxsmiles	JChemExcelrgAAAB+LCAAAAAAABADtvQdgHEmWJSYvbcp7f0r1StfgdKEIgGATJNiQQBDswYjN5pLsHWlHIymrKoHKZVZlXWYWQMztnbz33nvvvffee++997o7nU4n99//P1xmZAFs9s5K2smeIYCqyB8/fnwfPyK+9+3vf3myRf/e2ZruTvkX8y99/tmXd0629Gv8w790/u78+bXf2+18+GKr3+r/AYC0RBquAAAA
F2C27DEF4FF1F602CADB44938F908FC0	1	cxsmiles	JChemExcelCgEAAB+LCAAAAAAABADtvQdgHEmWJSYvbcp7f0r1StfgdKEIgGATJNiQQBDswYjN5pLsHWlHIymrKoHKZVZlXWYWQMztnbz33nvvvffee++997o7nU4n99//P1xmZAFs9s5K2smeIYCqyB8/fnwfPyK+9+3vT3enW/Tjjv67N92a7uK37c4X/r+7J3v8y/defPL9rRP+Vf7GL52/vT+/5q+36mXXoj+A8972hi939/4fEcLwmgoBAAA=
398F5A9CAF93CF3E28143EBB10FF553A	1	cxsmiles	JChemExcel8QEAAB+LCAAAAAAABADtvQdgHEmWJSYvbcp7f0r1StfgdKEIgGATJNiQQBDswYjN5pLsHWlHIymrKoHKZVZlXWYWQMztnbz33nvvvffee++997o7nU4n99//P1xmZAFs9s5K2smeIYCqyB8/fnwfPyK+9+3v/74nW5+dbP2+9Nudky38u9X79bMv73w59J399XsvPvn+7pb/wWDT6d5Ufm75YIc+kTdOdntQdt8HSu+T3WH8/n884v8Hrame9vEBAAA=
875DD745C83633F150A7267CD5969E36	1	cxsmiles	JChemExcelgwAAAB+LCAAAAAAABADtvQdgHEmWJSYvbcp7f0r1StfgdKEIgGATJNiQQBDswYjN5pLsHWlHIymrKoHKZVZlXWYWQMztnbz33nvvvffee++997o7nU4n99//P1xmZAFs9s5K2smeIYCqyB8/fnwfPyK+9+3vv9g62frsxckW/XqH/8H/vT9fbH325R36n/eR9+tr7/fp7nK61Ux3ewCGgX/v29//fwBxTBjegwAAAA==
C8767944DEC4B387F49F635964FEAB7A	1	cxsmiles	JChemExcelowAAAB+LCAAAAAAABADtvQdgHEmWJSYvbcp7f0r1StfgdKEIgGATJNiQQBDswYjN5pLsHWlHIymrKoHKZVZlXWYWQMztnbz33nvvvffee++997o7nU4n99//P1xmZAFs9s5K2smeIYCqyB8/fnwfPyK+9+3vv9iif+5Md6fyU//Vn7tfnvAv/M+Nv8qfn315Z+CtF1ub3hv45v8BnYSkTqMAAAA=
3DC18407DA333AF1E33C8D911C5539A0	1	cxsmiles	JChemExcelaQEAAB+LCAAAAAAABADtvQdgHEmWJSYvbcp7f0r1StfgdKEIgGATJNiQQBDswYjN5pLsHWlHIymrKoHKZVZlXWYWQMztnbz33nvvvffee++997o7nU4n99//P1xmZAFs9s5K2smeIYCqyB8/fnwfPyK+9+3vn2zRP3f4n5Otz7688+XJrv7Bn/tf78mPe/733V/3B778koF7nw/0se//dXN3u3ud5t978cn3d3sw4i8PgPzZgPX/APQGJWNpAQAA
54E85283C2C97906FCEEC4B3DD2DD7B8	1	cxsmiles	JChemExcelwwAAAB+LCAAAAAAABADtvQdgHEmWJSYvbcp7f0r1StfgdKEIgGATJNiQQBDswYjN5pLsHWlHIymrKoHKZVZlXWYWQMztnbz33nvvvffee++997o7nU4n99//P1xmZAFs9s5K2smeIYCqyB8/fnwfPyK+9+3vf3my9dmXd052t+j3Oy+25C/+Y+sF/9A/+Isv9Q/vc/zT+fNWjfjPvQ3tB37VVwTf7337+/8P4KXfpcMAAAA=
50AD65BE8003EAACFB8D2629B5623766	1	cxsmiles	JChemExceldQEAAB+LCAAAAAAABADtvQdgHEmWJSYvbcp7f0r1StfgdKEIgGATJNiQQBDswYjN5pLsHWlHIymrKoHKZVZlXWYWQMztnbz33nvvvffee++997o7nU4n99//P1xmZAFs9s5K2smeIYCqyB8/fnwfPyK+9+3vn2zRP3f4n5Otz7688+XJrv7Bn7/YCxrYX7/34pPvb/l/45fO3/6bexs+PbnXhe7/uj/w5ZeMbrzLF/e/GazvRz/d772ycQC7Pgm/9+3v/z9oxTirdQEAAA==
5D428B3CF88C2527F016CC75DC122E79	1	cxsmiles	JChemExcelewAAAB+LCAAAAAAABADtvQdgHEmWJSYvbcp7f0r1StfgdKEIgGATJNiQQBDswYjN5pLsHWlHIymrKoHKZVZlXWYWQMztnbz33nvvvffee++997o7nU4n99//P1xmZAFs9s5K2smeIYCqyB8/fnwfPyK+9+3vv9iif+5Md6fyU//Vn7v492Trsy/vSLMT/rf764ut+OfDb3zv29//fwBh15QRewAAAA==
113C2FA8838A6B32AA84A500E6C36F7F	1	cxsmiles	JChemExcelyQAAAB+LCAAAAAAABADtvQdgHEmWJSYvbcp7f0r1StfgdKEIgGATJNiQQBDswYjN5pLsHWlHIymrKoHKZVZlXWYWQMztnbz33nvvvffee++997o7nU4n99//P1xmZAFs9s5K2smeIYCqyB8/fnwfPyK+9+3vf3my9dmXd052t+j3Oy+25C/+Y+sF/9A/+Isv9Q/vc/zT+dP7dbo3lZ/9f/diQPa6AAZ+1XaC9fe+/f3/B5/grAPJAAAA
D5133EB624D34E36BBE61204D121E3AB	1	cxsmiles	JChemExcelkwAAAB+LCAAAAAAABADtvQdgHEmWJSYvbcp7f0r1StfgdKEIgGATJNiQQBDswYjN5pLsHWlHIymrKoHKZVZlXWYWQMztnbz33nvvvffee++997o7nU4n99//P1xmZAFs9s5K2smeIYCqyB8/fnwfPyK+9+3vv9iif+683vrsyzv4/3R3yh+Yf7884V/4H/lkuoufJ2gs73otTnb5x4st/7MQQPwbffF73/7+/wOta4MzkwAAAA==
6A734693BDE91164BAA992071603DF82	1	cxsmiles	JChemExceldgAAAB+LCAAAAAAABADtvQdgHEmWJSYvbcp7f0r1StfgdKEIgGATJNiQQBDswYjN5pLsHWlHIymrKoHKZVZlXWYWQMztnbz33nvvvffee++997o7nU4n99//P1xmZAFs9s5K2smeIYCqyB8/fnwfPyK+9+3vv9iif+5Md6fyU//Vn7v492Trsy/vfHnCn2zJB/bXF1vxzzt/ht/8P5ZQfel2AAAA
0EB1ADC2742B15C84E23F5D466682675	1	cxsmiles	JChemExcel0gAAAB+LCAAAAAAABADtvQdgHEmWJSYvbcp7f0r1StfgdKEIgGATJNiQQBDswYjN5pLsHWlHIymrKoHKZVZlXWYWQMztnbz33nvvvffee++997o7nU4n99//P1xmZAFs9s5K2smeIYCqyB8/fnwfPyK+9+3vn2zRP3f4n++9+OT7W/7f+KXzt/fnD+HX98Toe9/+/v8DhiTjA9IAAAA=
27F419E5B2E2FC7D0329BDC39C05887D	1	cxsmiles	JChemExcelXQAAAB+LCAAAAAAABADtvQdgHEmWJSYvbcp7f0r1StfgdKEIgGATJNiQQBDswYjN5pLsHWlHIymrKoHKZVZlXWYWQMztnbz33nvvvffee++997o7nU4n99//P1xmZAFs9s5K2smeIYCqyB8/fnwfPyK+9+3vfzndnW7Rzzvhv9Nd/Pzei0++v3XCH/E//Evnb+/P8Jv/B1tBtOxdAAAA
5B0FCDD2A756B30B87F50EE00FED1C84	1	cxsmiles	JChemExceltAAAAB+LCAAAAAAABADtvQdgHEmWJSYvbcp7f0r1StfgdKEIgGATJNiQQBDswYjN5pLsHWlHIymrKoHKZVZlXWYWQMztnbz33nvvvffee++997o7nU4n99//P1xmZAFs9s5K2smeIYCqyB8/fnwfPyK+9+3vT3enW/TjjvlXf+7i3xP+nf95sev90f/V/2RPv/jsyzvTewbsl16LoU/433v6frefXfPp/wNApHn/tAAAAA==
6F1E7770F8CE7A5988B9D7BBD6C979CE	1	cxsmiles	JChemExcelUgAAAB+LCAAAAAAABADtvQdgHEmWJSYvbcp7f0r1StfgdKEIgGATJNiQQBDswYjN5pLsHWlHIymrKoHKZVZlXWYWQMztnbz33nvvvffee++997o7nU4n99//P1xmZAFs9s5K2smeIYCqyB8/fnwfPyK+9+3vn2zRP3f4H/31y5dbz+5sffblnS/1A6+J1yz+5/8DuNwzWFIAAAA=
0E362C85C5A9E441B3AB0C961E4EE918	1	cxsmiles	JChemExcelUgAAAB+LCAAAAAAABADtvQdgHEmWJSYvbcp7f0r1StfgdKEIgGATJNiQQBDswYjN5pLsHWlHIymrKoHKZVZlXWYWQMztnbz33nvvvffee++997o7nU4n99//P1xmZAFs9s5K2smeIYCqyB8/fnwfPyK+9+3vT3enW/TjznTry5Otz76882LrhP/mf/D/zp/S+nvLT76/Nd3tf///AOhjp35SAAAA
05D5414A485CD9F4DBCFE56EEA1BC71A	1	cxsmiles	JChemExcelWQAAAB+LCAAAAAAABADtvQdgHEmWJSYvbcp7f0r1StfgdKEIgGATJNiQQBDswYjN5pLsHWlHIymrKoHKZVZlXWYWQMztnbz33nvvvffee++997o7nU4n99//P1xmZAFs9s5K2smeIYCqyB8/fnwfPyK+9+3vv9iif+5Md6d7063l9N5U/uz/u3vvzgn/xv8M/LrHP7737e//PzPhmYFZAAAA
E72ABD3B2AC8D5FACC210F747B6040BC	1	cxsmiles	JChemExcelgQAAAB+LCAAAAAAABADtvQdgHEmWJSYvbcp7f0r1StfgdKEIgGATJNiQQBDswYjN5pLsHWlHIymrKoHKZVZlXWYWQMztnbz33nvvvffee++997o7nU4n99//P1xmZAFs9s5K2smeIYCqyB8/fnwfPyK+9+3vT3enW/TjznTry5Otz76882LrhP/mf/B/78/ON+bF6a735ab3+3/+P8tTTdOBAAAA
4F932292784122AA715E9F8A89CA4C86	1	cxsmiles	JChemExcelkAAAAB+LCAAAAAAABADtvQdgHEmWJSYvbcp7f0r1StfgdKEIgGATJNiQQBDswYjN5pLsHWlHIymrKoHKZVZlXWYWQMztnbz33nvvvffee++997o7nU4n99//P1xmZAFs9s5K2smeIYCqyB8/fnwfPyK+9+3vT3enW/Tjjv6792Jrei/4xP/33uvp3nQXv57wB1very+2+p/hn3jryDff+/b3/x/eS70IkAAAAA==
1C86B596997E48071092925DA36460A7	1	cxsmiles	JChemExcelOAEAAB+LCAAAAAAABADtvQdgHEmWJSYvbcp7f0r1StfgdKEIgGATJNiQQBDswYjN5pLsHWlHIymrKoHKZVZlXWYWQMztnbz33nvvvffee++997o7nU4n99//P1xmZAFs9s5K2smeIYCqyB8/fnwfPyK+9+3vT3enW/TjznTry5Otz76882LrhP/mf/B/788fwq/onrD4crpn0PL/ne4xVi8++X4Xyw1YR/608Ha/Hrz/B3wGqU84AQAA
8EE15098F801E0F6D83EB434E32B3210	1	cxsmiles	JChemExcelogAAAB+LCAAAAAAABADtvQdgHEmWJSYvbcp7f0r1StfgdKEIgGATJNiQQBDswYjN5pLsHWlHIymrKoHKZVZlXWYWQMztnbz33nvvvffee++997o7nU4n99//P1xmZAFs9s5K2smeIYCqyB8/fnwfPyK+9+3vf3my9dmXd0626Nc7/E//1xf6B7Wb7k75D/Ov/tz1Wvvv//hJB+J0dzndm24t8b+9pbwn4MPfuLMvv/ft7/8/cbgEg6IAAAA=
0F37D1CB75FDD5F02EEDA714DF7A1E2F	1	cxsmiles	JChemExcelYwAAAB+LCAAAAAAABADtvQdgHEmWJSYvbcp7f0r1StfgdKEIgGATJNiQQBDswYjN5pLsHWlHIymrKoHKZVZlXWYWQMztnbz33nvvvffee++997o7nU4n99//P1xmZAFs9s5K2smeIYCqyB8/fnwfPyK+9+3vv/jsZOvFFv1y52Trsxf4af7Cv1v6A/94n5o/pel0dyo/9d+TUv/Z/d63v///AGunqExjAAAA
498794646C4DE63694BCC667CF0F5D6F	1	cxsmiles	JChemExcelkQAAAB+LCAAAAAAABADtvQdgHEmWJSYvbcp7f0r1StfgdKEIgGATJNiQQBDswYjN5pLsHWlHIymrKoHKZVZlXWYWQMztnbz33nvvvffee++997o7nU4n99//P1xmZAFs9s5K2smeIYCqyB8/fnwfPyK+9+3vv9iif+5Md5dT+WVrurXcvSOf4v8n/Js2Mm2+9D4d+GTPfCI/PjtREHt3Tnb5V+8F/eR73/7+/wNlklCskQAAAA==
EFD69807B9EDA888A51CB639E3843FBE	1	cxsmiles	JChemExcelZAAAAB+LCAAAAAAABADtvQdgHEmWJSYvbcp7f0r1StfgdKEIgGATJNiQQBDswYjN5pLsHWlHIymrKoHKZVZlXWYWQMztnbz33nvvvffee++997o7nU4n99//P1xmZAFs9s5K2smeIYCqyB8/fnwfPyK+9+3vv/jsZOvFFv1y52Trsxf4af7Cv1v6A/94n5o/pel0dyo/9d+T0vy6+71vf///AbXzqf5kAAAA
09EC6DD5BCA1BD93DF625A7E6ACA1837	1	cxsmiles	JChemExcelcQAAAB+LCAAAAAAABADtvQdgHEmWJSYvbcp7f0r1StfgdKEIgGATJNiQQBDswYjN5pLsHWlHIymrKoHKZVZlXWYWQMztnbz33nvvvffee++997o7nU4n99//P1xmZAFs9s5K2smeIYCqyB8/fnwfPyK+9+3vv9iif+5Md5dT+WVrurXcvSOf4v8n/Js2Mm2+9D699Se73/v29/8fuESRj3EAAAA=
671D54216BD871C146DFBF7B4D130CAC	1	cxsmiles	JChemExcelkgAAAB+LCAAAAAAABADtvQdgHEmWJSYvbcp7f0r1StfgdKEIgGATJNiQQBDswYjN5pLsHWlHIymrKoHKZVZlXWYWQMztnbz33nvvvffee++997o7nU4n99//P1xmZAFs9s5K2smeIYCqyB8/fnwfPyK+9+3vv9iif+5Md5fTLfmV/9ybbuE//l3+3Vvu3jnhX/kf85pp86X33a0/2cW/4Yf/Dy5HkbCSAAAA
6B8E79754481FE8541285A70666A8642	1	cxsmiles	JChemExceljwAAAB+LCAAAAAAABADtvQdgHEmWJSYvbcp7f0r1StfgdKEIgGATJNiQQBDswYjN5pLsHWlHIymrKoHKZVZlXWYWQMztnbz33nvvvffee++997o7nU4n99//P1xmZAFs9s5K2smeIYCqyB8/fnwfPyK+9+3vf3my9dmXd0626Nc7/E//1xf6B7Wb7k75D/Ov+cq+Mt1bTu9Nt5b4373ldA+fSaPwNwWwayF/+b1vf///ASiXlcmPAAAA
70070C6ECADDF30A3777EB1AEFB462A7	1	cxsmiles	JChemExcelXgAAAB+LCAAAAAAABADtvQdgHEmWJSYvbcp7f0r1StfgdKEIgGATJNiQQBDswYjN5pLsHWlHIymrKoHKZVZlXWYWQMztnbz33nvvvffee++997o7nU4n99//P1xmZAFs9s5K2smeIYCqyB8/fnwfPyK+9+3vv9iif+6c7H724mTrxdbJ1mcvdu/IZ/j/dHfKv5t/T0rz6y7+pfb8wzQP//x/ANrc789eAAAA
0FC37B9D4B4DC2B69883F9CDD4CB6738	1	cxsmiles	JChemExcelWAAAAB+LCAAAAAAABADtvQdgHEmWJSYvbcp7f0r1StfgdKEIgGATJNiQQBDswYjN5pLsHWlHIymrKoHKZVZlXWYWQMztnbz33nvvvffee++997o7nU4n99//P1xmZAFs9s5K2smeIYCqyB8/fnwfPyK+9+3vv9iif+5Md5fTLfmV/9zanu5N5Rv996Q0v+7JB8vdOyf8Af/j/fq9b3///wH55H+XWAAAAA==
2BF49E5340ECE9A6DADF5DA0D8993D26	1	cxsmiles	JChemExcelmQAAAB+LCAAAAAAABADtvQdgHEmWJSYvbcp7f0r1StfgdKEIgGATJNiQQBDswYjN5pLsHWlHIymrKoHKZVZlXWYWQMztnbz33nvvvffee++997o7nU4n99//P1xmZAFs9s5K2smeIYCqyB8/fnwfPyK+9+3vf3my9dmXd0626Nc7/E//1xf6B7Wb7k75D/Ov/tyNvyjfSZul/LX34rMTBYj/B6D35Jcvv/ft7/8/M3anEpkAAAA=
6BDFCC523E8F5CD3A9E3D9E097EF0DA5	1	cxsmiles	JChemExcel7QEAAB+LCAAAAAAABADtvQdgHEmWJSYvbcp7f0r1StfgdKEIgGATJNiQQBDswYjN5pLsHWlHIymrKoHKZVZlXWYWQMztnbz33nvvvffee++997o7nU4n99//P1xmZAFs9s5K2smeIYCqyB8/fnwfPyK+9+3vf3myu0U/7pzwvwO/bvyEP93jX7882frsyzsn9/iPF1vyF/+zv/WlNhgAyL/udz+Jo2OgmBa/L/VxsvX74te7J1t38TPyt/4ZRT8yPkY92p352HWtv3lv7nVbf+ifA7/ei7aVKe3g/f8AN0X31+0BAAA=
EE3BF965DC96AF9C94027335C7CE418E	1	cxsmiles	JChemExcelqQEAAB+LCAAAAAAABADtvQdgHEmWJSYvbcp7f0r1StfgdKEIgGATJNiQQBDswYjN5pLsHWlHIymrKoHKZVZlXWYWQMztnbz33nvvvffee++997o7nU4n99//P1xmZAFs9s5K2smeIYCqyB8/fnwfPyK+9+3vf3myu0U/7pzwvwO/nmz9vvj52cnWXe9LbrDHv355svXZl3dO7vEfL7bkL/5nf+tLbaCQ+If504LxutzvIuH9uem9oINIg9+XEDoxv2lbRrMLghHWgd3Un0K8TdPer/eibWU6OgP9fwDlnnx6qQEAAA==
2977F25B50A6A449CFB7BE92F1854161	1	cxsmiles	JChemExcelpQEAAB+LCAAAAAAABADtvQdgHEmWJSYvbcp7f0r1StfgdKEIgGATJNiQQBDswYjN5pLsHWlHIymrKoHKZVZlXWYWQMztnbz33nvvvffee++997o7nU4n99//P1xmZAFs9s5K2smeIYCqyB8/fnwfPyK+9+3vf3myu0U/7pzwv/rrZ1+av39f+fnZyZbXAP/XL/x3Oy36Db7sttjjX+njLxUAd0z/vLjXf3vDr/cc3qYP+uNk627w7QYoJ+Ugjvfsr/6Q+ase5XyI0U/5VzvqwRbBN/8PUlBRkqUBAAA=
B2C2F2385D2D458CDEF9B6BDBBD525CF	1	cxsmiles	JChemExcelMwEAAB+LCAAAAAAABADtvQdgHEmWJSYvbcp7f0r1StfgdKEIgGATJNiQQBDswYjN5pLsHWlHIymrKoHKZVZlXWYWQMztnbz33nvvvffee++997o7nU4n99//P1xmZAFs9s5K2smeIYCqyB8/fnwfPyK+9+3vv9g62aIfdz778o78Qn/T71/aP/gH/vnh/tr9Zpd/fMnI6R83wrjx1/g3ww2+9+3v/z/hCZJQMwEAAA==
4F054190FD5A540CE75253F3DCA90993	1	cxsmiles	JChemExcelOwAAAB+LCAAAAAAABADtvQdgHEmWJSYvbcp7f0r1StfgdKEIgGATJNiQQBDswYjN5pLsHWlHIymrKoHKZVZlXWYWQMztnbz33nvvvffee++997o7nU4n99//P1xmZAFs9s5K2smeIYCqyB8/fnwfPyK+9+3vv9g92frsxXRvukV/3DH/npTm173Xu1uffXmH/nfCH/A/3/v29/8fopBIvzsAAAA=
FDD2D637C90CF4A48A0224FF135F3947	1	cxsmiles	JChemExcelVAAAAB+LCAAAAAAABADtvQdgHEmWJSYvbcp7f0r1StfgdKEIgGATJNiQQBDswYjN5pLsHWlHIymrKoHKZVZlXWYWQMztnbz33nvvvffee++997o7nU4n99//P1xmZAFs9s5K2smeIYCqyB8/fnwfPyK+9+3vf3my9dmXd6a7y+XWdG+6RZ/cify7u3fnhH/TP8MmJ6Vtd1L+P8cSKW1UAAAA
8BCC25ACC54EB2C614FB8F820306916C	1	cxsmiles	JChemExcelUgAAAB+LCAAAAAAABADtvQdgHEmWJSYvbcp7f0r1StfgdKEIgGATJNiQQBDswYjN5pLsHWlHIymrKoHKZVZlXWYWQMztnbz33nvvvffee++997o7nU4n99//P1xmZAFs9s5K2smeIYCqyB8/fnwfPyK+9+3vf3myRf/e4X9OdvmH+Wi6t5xuTfn3Zu/OydZnX955wX9xW2nzpf/e9779/f8HZ8hyllIAAAA=
276587278E6C661C67DCE52075AC24B1	1	cxsmiles	JChemExcelVgAAAB+LCAAAAAAABADtvQdgHEmWJSYvbcp7f0r1StfgdKEIgGATJNiQQBDswYjN5pLsHWlHIymrKoHKZVZlXWYWQMztnbz33nvvvffee++997o7nU4n99//P1xmZAFs9s5K2smeIYCqyB8/fnwfPyK+9+3vfzndnW4tp1v0653l7sku//LlCf/Y0h/8Ef7Rv+V3bSqff/blnRf89/e+/f3/BxmzxM9WAAAA
9A2613F16B8B1A44FECF507B83B1EF5E	1	cxsmiles	JChemExcelIgAAAB+LCAAAAAAABADtvQdgHEmWJSYvbcp7f0r1StfgdKEIgGATJNiQQBDswYjN5pLsHWlHIymrKoHKZVZlXWYWQMztnbz33nvvvffee++997o7nU4n99//P1xmZAFs9s5K2smeIYCqyB8/fnwfPyK+9+3vv9g92aIfdz57Md1bTvnXJf873TvZ/ez1/wMhhbR5IgAAAA==
F5706567B1AFA5B15593B3C51776E122	1	cxsmiles	JChemExcelUAAAAB+LCAAAAAAABADtvQdgHEmWJSYvbcp7f0r1StfgdKEIgGATJNiQQBDswYjN5pLsHWlHIymrKoHKZVZlXWYWQMztnbz33nvvvffee++997o7nU4n99//P1xmZAFs9s5K2smeIYCqyB8/fnwfPyK+9+3vf3myRf/e4X9OdvmH+Wi5t5xuLad7/NXWZ1/eecGfy5/c4kv/re99+/v/D4qepFtQAAAA
1653916F0A209E4E5E71E2D9E604CCA8	1	cxsmiles	JChemExcelggAAAB+LCAAAAAAABADtvQdgHEmWJSYvbcp7f0r1StfgdKEIgGATJNiQQBDswYjN5pLsHWlHIymrKoHKZVZlXWYWQMztnbz33nvvvffee++997o7nU4n99//P1xmZAFs9s5K2smeIYCqyB8/fnwfPyK+9+3vf3my9dmXd0626Nc7/E/w62cn3c+mu9OtL/mXPX7zS/+7venWdNf/pPNy/8//B+/pFUiCAAAA
5FD16D85675279E1126E68F49B4AB7E0	1	cxsmiles	JChemExcelwwAAAB+LCAAAAAAABADtvQdgHEmWJSYvbcp7f0r1StfgdKEIgGATJNiQQBDswYjN5pLsHWlHIymrKoHKZVZlXWYWQMztnbz33nvvvffee++997o7nU4n99//P1xmZAFs9s5K2smeIYCqyB8/fnwfPyK+9+3vfzndne6dbH325Z0vT7bo7zv8z3RvujXd8j/hT3e9D+TXz062Oo16TfTXTg/ery/6YPmfoPlurIPvffv7/w/5odmowwAAAA==
944DF3AB0C2A7150AE26949C52909649	1	cxsmiles	JChemExcelsgAAAB+LCAAAAAAABADtvQdgHEmWJSYvbcp7f0r1StfgdKEIgGATJNiQQBDswYjN5pLsHWlHIymrKoHKZVZlXWYWQMztnbz33nvvvffee++997o7nU4n99//P1xmZAFs9s5K2smeIYCqyB8/fnwfPyK+9+3vn2zRP3f4n++9+OT7W/7f+KXzt/en9+uXJ1uffTnwHX/1Zfy79+zxe9/+/v8DNsyx1bIAAAA=
DACA556CBCEEAD07882CBE4673F9A699	1	cxsmiles	JChemExcelgwAAAB+LCAAAAAAABADtvQdgHEmWJSYvbcp7f0r1StfgdKEIgGATJNiQQBDswYjN5pLsHWlHIymrKoHKZVZlXWYWQMztnbz33nvvvffee++997o7nU4n99//P1xmZAFs9s5K2smeIYCqyB8/fnwfPyK+9+3vf3myu0U/7pzwv5/Jj5O9e9P96daXJ3vypzTB//Eh/+F94v277335YqvT0vvz5J759P8BDqnY64MAAAA=
257687CE66A9113A4BFED10F01C6611E	1	cxsmiles	JChemExceldQAAAB+LCAAAAAAABADtvQdgHEmWJSYvbcp7f0r1StfgdKEIgGATJNiQQBDswYjN5pLsHWlHIymrKoHKZVZlXWYWQMztnbz33nvvvffee++997o7nU4n99//P1xmZAFs9s5K2smeIYCqyB8/fnwfPyK+9+3vv9iif+5Md6fyU/892frsyztfnvBf/I/364ut+OedPzvfEMySuvnet7///wAz0lIWdQAAAA==
79ACDE803FAE076A6F618B6593D11D83	1	cxsmiles	JChemExceloQAAAB+LCAAAAAAABADtvQdgHEmWJSYvbcp7f0r1StfgdKEIgGATJNiQQBDswYjN5pLsHWlHIymrKoHKZVZlXWYWQMztnbz33nvvvffee++997o7nU4n99//P1xmZAFs9s5K2smeIYCqyB8/fnwfPyK+9+3vT3enW/TjjvlXf+7i35Otk63PvqQf+GNLPrG/8i/dt71/FUL31RdbHRgb//x/APESGsOhAAAA
91000E803D69E6DD695E4675451BAA10	1	cxsmiles	JChemExceltwAAAB+LCAAAAAAABADtvQdgHEmWJSYvbcp7f0r1StfgdKEIgGATJNiQQBDswYjN5pLsHWlHIymrKoHKZVZlXWYWQMztnbz33nvvvffee++997o7nU4n99//P1xmZAFs9s5K2smeIYCqyB8/fnwfPyK+9+3vn2zRP3f4n++9+OT7u1veB+/zK17e81++1Vsne+/Rdte0/X8AOZrYdLcAAAA=
9FBC8C56E0523E4E28006F7DBB37AF48	1	cxsmiles	JChemExcelowAAAB+LCAAAAAAABADtvQdgHEmWJSYvbcp7f0r1StfgdKEIgGATJNiQQBDswYjN5pLsHWlHIymrKoHKZVZlXWYWQMztnbz33nvvvffee++997o7nU4n99//P1xmZAFs9s5K2smeIYCqyB8/fnwfPyK+9+3vT3enW/TjjvlXf+7i3xP+nf95sXuy9dmXd15seZ9N98JXvX/3+PU9/uNkV364F7/3+pPv73p/D/y6ByT+H56N/DujAAAA
59D700122700885C03B065A3DEFD440F	1	cxsmiles	JChemExcelfgAAAB+LCAAAAAAABADtvQdgHEmWJSYvbcp7f0r1StfgdKEIgGATJNiQQBDswYjN5pLsHWlHIymrKoHKZVZlXWYWQMztnbz33nvvvffee++997o7nU4n99//P1xmZAFs9s5K2smeIYCqyB8/fnwfPyK+9+3vT3enW/TjjvlXf+7i35Pdz16c8N/y4d5yOd1a7m1P98J3Tkrz6+7eHe+FF1veHwww+PP/AVSl8fB+AAAA
2606D24A615396B76ABDB17FC5BE1FF6	1	cxsmiles	JChemExcelngAAAB+LCAAAAAAABADtvQdgHEmWJSYvbcp7f0r1StfgdKEIgGATJNiQQBDswYjN5pLsHWlHIymrKoHKZVZlXWYWQMztnbz33nvvvffee++997o7nU4n99//P1xmZAFs9s5K2smeIYCqyB8/fnwfPyK+9+3vT3enW/TjjvlXf+7i3+3p7lL/3nuxdbL12Zd3XmxN95a7d074U/5HP/Y+6YL0/t2VN7yX7a/9P/8fJk0Gjp4AAAA=
FC06E4783793E8802EE29CAF35501C81	1	cxsmiles	JChemExcelYgAAAB+LCAAAAAAABADtvQdgHEmWJSYvbcp7f0r1StfgdKEIgGATJNiQQBDswYjN5pLsHWlHIymrKoHKZVZlXWYWQMztnbz33nvvvffee++997o7nU4n99//P1xmZAFs9s5K2smeIYCqyB8/fnwfPyK+9+3vT3enW/TjjvlXf+7i35Pdz16c8N/y4d5yOd1a7m1P98J3Tkrz6+7eHe+F7337+/8PjoyLNmIAAAA=
BD2771C01650AC7331B054E966AD8163	1	cxsmiles	JChemExcelWQAAAB+LCAAAAAAABADtvQdgHEmWJSYvbcp7f0r1StfgdKEIgGATJNiQQBDswYjN5pLsHWlHIymrKoHKZVZlXWYWQMztnbz33nvvvffee++997o7nU4n99//P1xmZAFs9s5K2smeIYCqyB8/fnwfPyK+9+3vT3enW/TjznTL/OR/d0/KOye7/PuLrZOtz768c8J/8D/er6938V349fe+/f3/B2vWoB5ZAAAA
6933D8D8184924DA2D350B8A94411F78	1	cxsmiles	JChemExcelaAAAAB+LCAAAAAAABADtvQdgHEmWJSYvbcp7f0r1StfgdKEIgGATJNiQQBDswYjN5pLsHWlHIymrKoHKZVZlXWYWQMztnbz33nvvvffee++997o7nU4n99//P1xmZAFs9s5K2smeIYCqyB8/fnwfPyK+9+3vf3myu0U/7rz47GRrujfl3yP/7j274749KTtfvtg62f3syzsn/Cf/4//64y/+H/z9SgloAAAA
B8CB442EC902A88F5E9349571B52CCAE	1	cxsmiles	JChemExcelWQAAAB+LCAAAAAAABADtvQdgHEmWJSYvbcp7f0r1StfgdKEIgGATJNiQQBDswYjN5pLsHWlHIymrKoHKZVZlXWYWQMztnbz33nvvvffee++997o7nU4n99//P1xmZAFs9s5K2smeIYCqyB8/fnwfPyK+9+3vf3my9dmXd052t+j3Oy8+O9ma7k3598i/e/Kv+eyk7Hz9gn+e7H725f8DTXDbvlkAAAA=
1BA235251126640DA838E0475B1C1629	1	cxsmiles	JChemExcelfwAAAB+LCAAAAAAABADtvQdgHEmWJSYvbcp7f0r1StfgdKEIgGATJNiQQBDswYjN5pLsHWlHIymrKoHKZVZlXWYWQMztnbz33nvvvffee++997o7nU4n99//P1xmZAFs9s5K2smeIYCqyB8/fnwfPyK+9+3vn+x+drL15cne1ost+vXLOydb9OEd/udki/5+sTXdnfKf5t+T0vy6t+s35486bb1/dwWk3/z/AZ9vNNZ/AAAA
E0B8F21298EC0B6B1A131EC95A3CD097	1	cxsmiles	JChemExcelUwAAAB+LCAAAAAAABADtvQdgHEmWJSYvbcp7f0r1StfgdKEIgGATJNiQQBDswYjN5pLsHWlHIymrKoHKZVZlXWYWQMztnbz33nvvvffee++997o7nU4n99//P1xmZAFs9s5K2smeIYCqyB8/fnwfPyK+9+3vf3myu0U/7rz47GRrujfl3yP/7p2Ud9zX+CP49gX/PNn97Mv/B+/Z9kZTAAAA
F6F130134D8A6F51507E2FEAF048FD83	1	cxsmiles	JChemExcelXwAAAB+LCAAAAAAABADtvQdgHEmWJSYvbcp7f0r1StfgdKEIgGATJNiQQBDswYjN5pLsHWlHIymrKoHKZVZlXWYWQMztnbz33nvvvffee++997o7nU4n99//P1xmZAFs9s5K2smeIYCqyB8/fnwfPyK+9+3vf3myu0U/7rz47GRrujfl3yP/7sm/5rOTsvP1i62T3c++vHPCf/I/3/v29/8f0+M9J18AAAA=
4FB23970A70A3C05581A9FB5A0AF55E0	1	cxsmiles	JChemExcelYQAAAB+LCAAAAAAABADtvQdgHEmWJSYvbcp7f0r1StfgdKEIgGATJNiQQBDswYjN5pLsHWlHIymrKoHKZVZlXWYWQMztnbz33nvvvffee++997o7nU4n99//P1xmZAFs9s5K2smeIYCqyB8/fnwfPyK+9+3vT3enW/Tjjvl3unVS3pnu4o+T3c9enPDH8t3ecjndWu5tT/fCV/CC/Lq7d8d74Xvf/v7/A9AmKP5hAAAA
BD3AFCFDE9054F85D6704D0AA380F8CF	1	cxsmiles	JChemExcelawAAAB+LCAAAAAAABADtvQdgHEmWJSYvbcp7f0r1StfgdKEIgGATJNiQQBDswYjN5pLsHWlHIymrKoHKZVZlXWYWQMztnbz33nvvvffee++997o7nU4n99//P1xmZAFs9s5K2smeIYCqyB8/fnwfPyK+9+3vT3eXy73p1nSLfr8j/y6ne9Pdkx9/cWd7uut/bv6d7uLni62Trc++vHPCH/I/+L/3Z/jN/wPtG9tAawAAAA==
3D3691B501EE1CC3569345D21D2989CE	1	cxsmiles	JChemExcelggAAAB+LCAAAAAAABADtvQdgHEmWJSYvbcp7f0r1StfgdKEIgGATJNiQQBDswYjN5pLsHWlHIymrKoHKZVZlXWYWQMztnbz33nvvvffee++997o7nU4n99//P1xmZAFs9s5K2smeIYCqyB8/fnwfPyK+9+3vv9g92aIfdz6THy8+O9k72frsyzsvtk62vpTf7slX/I/3K1rYPzrfndyzn352srt3Z7q7nPIn062T8o7+uvu9b3///wH2bIefggAAAA==
F911B4BCD638531777AC6390B3477BA1	1	cxsmiles	JChemExcelmgAAAB+LCAAAAAAABADtvQdgHEmWJSYvbcp7f0r1StfgdKEIgGATJNiQQBDswYjN5pLsHWlHIymrKoHKZVZlXWYWQMztnbz33nvvvffee++997o7nU4n99//P1xmZAFs9s5K2smeIYCqyB8/fnwfPyK+9+3vT3enW/TjznTL/OR/d0/KO9vT3eV0L/h4iz6WX5d71IZ/439Otj778s6LreCT2K/D34SN/h85MVTZmgAAAA==
E686BF4F0C42462345BD56C32D1E33D3	1	cxsmiles	JChemExcelZgAAAB+LCAAAAAAABADtvQdgHEmWJSYvbcp7f0r1StfgdKEIgGATJNiQQBDswYjN5pLsHWlHIymrKoHKZVZlXWYWQMztnbz33nvvvffee++997o7nU4n99//P1xmZAFs9s5K2smeIYCqyB8/fnwfPyK+9+3vT3eX063l9t5092SL/rzD/7z47GRrujvl3yP/7j674749KcMvt/d273igvvft7/8/ZDWAAWYAAAA=
938080A25DC7D0C4E655B33A3E17FA5B	1	cxsmiles	JChemExcelNgAAAB+LCAAAAAAABADtvQdgHEmWJSYvbcp7f0r1StfgdKEIgGATJNiQQBDswYjN5pLsHWlHIymrKoHKZVZlXWYWQMztnbz33nvvvffee++997o7nU4n99//P1xmZAFs9s5K2smeIYCqyB8/fnwfPyK+9+3vv9iif+7Iv9Pd5XIqv+3pz/6/u3v/D9yhLWM2AAAA
066F8068CA5EB1AB22EF3B8D3B69E09A	1	cxsmiles	JChemExcelnwAAAB+LCAAAAAAABADtvQdgHEmWJSYvbcp7f0r1StfgdKEIgGATJNiQQBDswYjN5pLsHWlHIymrKoHKZVZlXWYWQMztnbz33nvvvffee++997o7nU4n99//P1xmZAFs9s5K2smeIYCqyB8/fnwfPyK+9+3vf/lk60v6cedkC/9uvdiSPz77MvLJdHc55b/k3+V013uTP9/1vw/+7TbVX71POg2+9+3v/z8xlazFnwAAAA==
3AB8E62155219A2A882385D4BB098AD0	1	cxsmiles	JChemExcelZAEAAB+LCAAAAAAABADtvQdgHEmWJSYvbcp7f0r1StfgdKEIgGATJNiQQBDswYjN5pLsHWlHIymrKoHKZVZlXWYWQMztnbz33nvvvffee++997o7nU4n99//P1xmZAFs9s5K2smeIYCqyB8/fnwfPyK+9+3vv9g62frsyzsnW/T7Hf7nxa73h/frl/7Hu/zDa8FQXvjv3PoTAvZlH2DkT/vSUIPOn9Pdqfzs/7v7gaBv38v/AybNDmxkAQAA
E1FB564F38F27FD181584E668348DD3C	1	cxsmiles	JChemExcelUwAAAB+LCAAAAAAABADtvQdgHEmWJSYvbcp7f0r1StfgdKEIgGATJNiQQBDswYjN5pLsHWlHIymrKoHKZVZlXWYWQMztnbz33nvvvffee++997o7nU4n99//P1xmZAFs9s5K2smeIYCqyB8/fnwfPyK+9+3vf3myRf/e4X9OdvmH+Wi5N+VfltN7070Xn8mnL6Tlvc++vNN/83vf/v7/A3DdZh5TAAAA
73E342B10D82B6DB4388CA993D822749	1	cxsmiles	JChemExcelVgAAAB+LCAAAAAAABADtvQdgHEmWJSYvbcp7f0r1StfgdKEIgGATJNiQQBDswYjN5pLsHWlHIymrKoHKZVZlXWYWQMztnbz33nvvvffee++997o7nU4n99//P1xmZAFs9s5K2smeIYCqyB8/fnwfPyK+9+3vf3myRf/e4X9OdvmH+Wi5N+VfltN7063ldOukpF/37t15wZ/yC/13v/ft7/8/LKcP1lYAAAA=
5762B5193AC061A0FE9B7ED5A1CAFB5F	1	cxsmiles	JChemExcelUQAAAB+LCAAAAAAABADtvQdgHEmWJSYvbcp7f0r1StfgdKEIgGATJNiQQBDswYjN5pLsHWlHIymrKoHKZVZlXWYWQMztnbz33nvvvffee++997o7nU4n99//P1xmZAFs9s5K2smeIYCqyB8/fnwfPyK+9+3vf3mydbJFP+/wP/FfX/C//OfLrc++vLP1JX7nfzp//z+egxJIUQAAAA==
090909C960C626E88487E184B39BB001	1	cxsmiles	JChemExcel7gAAAB+LCAAAAAAABADtvQdgHEmWJSYvbcp7f0r1StfgdKEIgGATJNiQQBDswYjN5pLsHWlHIymrKoHKZVZlXWYWQMztnbz33nvvvffee++997o7nU4n99//P1xmZAFs9s5K2smeIYCqyB8/fnwfPyK+9+3vT3enW/TjznTL/PzyhH/hf/iT3e4n3p/ery+2btUs+PXkx1/c2XIo9Lq+zSe7HtRhDL737e//P8EiHffuAAAA
8CDB49F2E9AFF6D3267F022E2F60A854	1	cxsmiles	JChemExcelRgAAAB+LCAAAAAAABADtvQdgHEmWJSYvbcp7f0r1StfgdKEIgGATJNiQQBDswYjN5pLsHWlHIymrKoHKZVZlXWYWQMztnbz33nvvvffee++997o7nU4n99//P1xmZAFs9s5K2smeIYCqyB8/fnwfPyK+9+3vf3my9dmXd0626Nc7Wy/4B/6vH+CfF7vyx2fyQ9t/KR/tfu/b3/9/ABofycVGAAAA
15163D1642732E461FB43A4BCC1C4ED3	1	cxsmiles	JChemExcelnAAAAB+LCAAAAAAABADtvQdgHEmWJSYvbcp7f0r1StfgdKEIgGATJNiQQBDswYjN5pLsHWlHIymrKoHKZVZlXWYWQMztnbz33nvvvffee++997o7nU4n99//P1xmZAFs9s5K2smeIYCqyB8/fnwfPyK+9+3vf3my9dmXd052t+j3Oyf8L//zYsv7o/frZydb071myr/rv3teI/lg8/cD4HdNg/8HpGdA05wAAAA=
6B908FBF5621A06CAD9A484CD418C7B9	1	cxsmiles	JChemExcelYQAAAB+LCAAAAAAABADtvQdgHEmWJSYvbcp7f0r1StfgdKEIgGATJNiQQBDswYjN5pLsHWlHIymrKoHKZVZlXWYWQMztnbz33nvvvffee++997o7nU4n99//P1xmZAFs9s5K2smeIYCqyB8/fnwfPyK+9+3vT3enW/TjjvlXf+7i3xe70z3z+Ulpm/C/ey+2TrY++/LOCf/J/5zshn9/79vf/38ANSAbk2EAAAA=
F2DBCD3224C5198152403A2B55428C2B	1	cxsmiles	JChemExcelcAAAAB+LCAAAAAAABADtvQdgHEmWJSYvbcp7f0r1StfgdKEIgGATJNiQQBDswYjN5pLsHWlHIymrKoHKZVZlXWYWQMztnbz33nvvvffee++997o7nU4n99//P1xmZAFs9s5K2smeIYCqyB8/fnwfPyK+9+3vv9g92aIfd/gf79cXWyd7n72Y3pvyX5F/733Z/fKkNL/u3fNBnezyj+99+/v/D5YSDgBwAAAA
AA5D4A23103A00A31A63ED0598C6B808	1	cxsmiles	JChemExcelfAAAAB+LCAAAAAAABADtvQdgHEmWJSYvbcp7f0r1StfgdKEIgGATJNiQQBDswYjN5pLsHWlHIymrKoHKZVZlXWYWQMztnbz33nvvvffee++997o7nU4n99//P1xmZAFs9s5K2smeIYCqyB8/fnwfPyK+9+3vv9g62aIfd/gf/N/7s//rl9PdKf8W+Xe3A2hT0+99+/v/D4k28NB8AAAA
B4700F36FC43C9E2C572E0D6D1FCDE93	1	cxsmiles	JChemExcelbgAAAB+LCAAAAAAABADtvQdgHEmWJSYvbcp7f0r1StfgdKEIgGATJNiQQBDswYjN5pLsHWlHIymrKoHKZVZlXWYWQMztnbz33nvvvffee++997o7nU4n99//P1xmZAFs9s5K2smeIYCqyB8/fnwfPyK+9+3vv9g62aIfd+jHZ1/eme5O+a/w35OSvsCv2hT/yJ+dD7p/h3/+PzpGHjRuAAAA
D8D4CE7AA798D2FEC07F925CF07C590C	1	cxsmiles	JChemExceldQAAAB+LCAAAAAAABADtvQdgHEmWJSYvbcp7f0r1StfgdKEIgGATJNiQQBDswYjN5pLsHWlHIymrKoHKZVZlXWYWQMztnbz33nvvvffee++997o7nU4n99//P1xmZAFs9s5K2smeIYCqyB8/fnwfPyK+9+3vT3eX063pFv12R//dxb8n/PvWdDf4auukjLXq/Ppiy/uj8933vv39/wfaygIrdQAAAA==
E32755ED016AB1826DA5EBDA3A14434E	1	cxsmiles	JChemExcelTwAAAB+LCAAAAAAABADtvQdgHEmWJSYvbcp7f0r1StfgdKEIgGATJNiQQBDswYjN5pLsHWlHIymrKoHKZVZlXWYWQMztnbz33nvvvffee++997o7nU4n99//P1xmZAFs9s5K2smeIYCqyB8/fnwfPyK+9+3vv/jsZOvFFv1yB/9/sXvCv/M/072p/Oz/u+c1O9k1r/8/CTDG3U8AAAA=
A3C5460FE875E7C4EE86C9C48A285FDF	1	cxsmiles	JChemExcelhgAAAB+LCAAAAAAABADtvQdgHEmWJSYvbcp7f0r1StfgdKEIgGATJNiQQBDswYjN5pLsHWlHIymrKoHKZVZlXWYWQMztnbz33nvvvffee++997o7nU4n99//P1xmZAFs9s5K2smeIYCqyB8/fnwfPyK+9+3vv9g62aIfd/gf/N/7M/7ri93p3pR/i/y7F39nwxu7e/8PCNwrNYYAAAA=
DD6E819525DFE02DA1341C68FE1DB9C5	1	cxsmiles	JChemExcelmwAAAB+LCAAAAAAABADtvQdgHEmWJSYvbcp7f0r1StfgdKEIgGATJNiQQBDswYjN5pLsHWlHIymrKoHKZVZlXWYWQMztnbz33nvvvffee++997o7nU4n99//P1xmZAFs9s5K2smeIYCqyB8/fnwfPyK+9+3vf3myu3WyRb/c4X9u/nWXf3ifTnen/Iv590uvtff5bgfQC7/bznff+/b3/x+6U1GxmwAAAA==
F6E094AA4C8DE1353F2E6EFEBB7424C4	1	cxsmiles	JChemExceleAAAAB+LCAAAAAAABADtvQdgHEmWJSYvbcp7f0r1StfgdKEIgGATJNiQQBDswYjN5pLsHWlHIymrKoHKZVZlXWYWQMztnbz33nvvvffee++997o7nU4n99//P1xmZAFs9s5K2smeIYCqyB8/fnwfPyK+9+3vv9g62aIfd/gf/N/7s//rl9PdKf8W/LsX+Uz+3d2j/zfhR9/79vf/H6cqY7h4AAAA
7216DD56A7808B80E6380F7CD524D012	1	cxsmiles	JChemExcel8gAAAB+LCAAAAAAABADtvQdgHEmWJSYvbcp7f0r1StfgdKEIgGATJNiQQBDswYjN5pLsHWlHIymrKoHKZVZlXWYWQMztnbz33nvvvffee++997o7nU4n99//P1xmZAFs9s5K2smeIYCqyB8/fnwfPyK+9+3vf3myu/flydaLLfr9zsnWZ1/eObmnv+Pfz072p/en/Gvw76fL4LPp/U/1BXl3n3+82PI+48/v2V+3uK8Xu9oi/Mv13/t1b7fzyXQ3gp5+02n6vW9///8Bi6OqzfIAAAA=
47CB0412D01320DB56DB3152BCD4C3D7	1	cxsmiles	JChemExcelewAAAB+LCAAAAAAABADtvQdgHEmWJSYvbcp7f0r1StfgdKEIgGATJNiQQBDswYjN5pLsHWlHIymrKoHKZVZlXWYWQMztnbz33nvvvffee++997o7nU4n99//P1xmZAFs9s5K2smeIYCqyB8/fnwfPyK+9+3vv/jsZOvFFv1yB/+X30743+6vL3bjn7/Xr7umq/8HZfGwmXsAAAA=
A4BDF93F2771DF89ECF195F722476071	1	cxsmiles	JChemExceljgAAAB+LCAAAAAAABADtvQdgHEmWJSYvbcp7f0r1StfgdKEIgGATJNiQQBDswYjN5pLsHWlHIymrKoHKZVZlXWYWQMztnbz33nvvvffee++997o7nU4n99//P1xmZAFs9s5K2smeIYCqyB8/fnwfPyK+9+3vv9g62aIfd/gf/N/7c+DX3b3pvSn/Gvn3nrbc0GT3XgBuz3T9/wA6VyZOjgAAAA==
FA9BC2CE21622D9A8A28EF325E75F51D	1	cxsmiles	JChemExcelXwAAAB+LCAAAAAAABADtvQdgHEmWJSYvbcp7f0r1StfgdKEIgGATJNiQQBDswYjN5pLsHWlHIymrKoHKZVZlXWYWQMztnbz33nvvvffee++997o7nU4n99//P1xmZAFs9s5K2smeIYCqyB8/fnwfPyK+9+3vf3myu/Vi72TrsxcnW/TnHf7nZI9/4P/TvSn/Hvl3d4/+H35+Utovv/ft7/8/qB205l8AAAA=
4AC25172BE0C2AFAC02740881297FB6D	1	cxsmiles	JChemExcelgwAAAB+LCAAAAAAABADtvQdgHEmWJSYvbcp7f0r1StfgdKEIgGATJNiQQBDswYjN5pLsHWlHIymrKoHKZVZlXWYWQMztnbz33nvvvffee++997o7nU4n99//P1xmZAFs9s5K2smeIYCqyB8/fnwfPyK+9+3vv9iif+6c8L/y627kk5Otz76882LL/9D92m0efjPdnfLvkX93v/ft7/8/jkTf5IMAAAA=
10F359401A8EB5877D0F7F41700196BB	1	cxsmiles	JChemExcelhwAAAB+LCAAAAAAABADtvQdgHEmWJSYvbcp7f0r1StfgdKEIgGATJNiQQBDswYjN5pLsHWlHIymrKoHKZVZlXWYWQMztnbz33nvvvffee++997o7nU4n99//P1xmZAFs9s5K2smeIYCqyB8/fnwfPyK+9+3vT3enW/TjjvlXf+7i3xP+fetL/el9hH9ebHl/dL4TGCFk79/dsOn/A0NJoGmHAAAA
A85D2A4ED20B29B4D15F4C60BC903592	1	cxsmiles	JChemExcelggAAAB+LCAAAAAAABADtvQdgHEmWJSYvbcp7f0r1StfgdKEIgGATJNiQQBDswYjN5pLsHWlHIymrKoHKZVZlXWYWQMztnbz33nvvvffee++997o7nU4n99//P1xmZAFs9s5K2smeIYCqyB8/fnwfPyK+9+3vv9g62aIfd/gf/N/7c+DXXf4x3ZvKz/6/e9L6s5ObGu7u/T+uU/G2ggAAAA==
07099AB4A84635476FED4C067C9ECFE0	1	cxsmiles	JChemExcelgQAAAB+LCAAAAAAABADtvQdgHEmWJSYvbcp7f0r1StfgdKEIgGATJNiQQBDswYjN5pLsHWlHIymrKoHKZVZlXWYWQMztnbz33nvvvffee++997o7nU4n99//P1xmZAFs9s5K2smeIYCqyB8/fnwfPyK+9+3vfzndnW7Rzzvhv9Nd/Dzhv7b0h/cJ/ok36DR6seG77337+/8POkGHT4EAAAA=
A9D1B58411D0E2395F8EF29F5282B815	1	cxsmiles	JChemExcelmgAAAB+LCAAAAAAABADtvQdgHEmWJSYvbcp7f0r1StfgdKEIgGATJNiQQBDswYjN5pLsHWlHIymrKoHKZVZlXWYWQMztnbz33nvvvffee++997o7nU4n99//P1xmZAFs9s5K2smeIYCqyB8/fnwfPyK+9+3vT3enW/Tjjv67N92a7uK3F1udb/x/d0/4J/9zssc/+FfvU/nV+6TT4MWG77737e//P60/tz+aAAAA
B24D84B4ABB1EF49FC6EC06E1D986DA6	1	cxsmiles	JChemExcelcwAAAB+LCAAAAAAABADtvQdgHEmWJSYvbcp7f0r1StfgdKEIgGATJNiQQBDswYjN5pLsHWlHIymrKoHKZVZlXWYWQMztnbz33nvvvffee++997o7nU4n99//P1xmZAFs9s5K2smeIYCqyB8/fnwfPyK+9+3vv9g92aIfd/ifm3/d9T852frsyztfel/j/9PdKf8e+Xf3e9/+/v8DMeKgeHMAAAA=
994523AD396A59726C0859188F55E229	1	cxsmiles	JChemExcelggAAAB+LCAAAAAAABADtvQdgHEmWJSYvbcp7f0r1StfgdKEIgGATJNiQQBDswYjN5pLsHWlHIymrKoHKZVZlXWYWQMztnbz33nvvvffee++997o7nU4n99//P1xmZAFs9s5K2smeIYCqyB8/fnwfPyK+9+3vv9g92aIfd/if/q/TvSn/Yv59Zn7b8xp5r33ZeeHel8GX9/S9Xf77e9/+/v8DKx9iSoIAAAA=
DADF64E3DDC7AEFAD16FB2743B8F2076	1	cxsmiles	JChemExceljAAAAB+LCAAAAAAABADtvQdgHEmWJSYvbcp7f0r1StfgdKEIgGATJNiQQBDswYjN5pLsHWlHIymrKoHKZVZlXWYWQMztnbz33nvvvffee++997o7nU4n99//P1xmZAFs9s5K2smeIYCqyB8/fnwfPyK+9+3vv9g92aIfd/gf79cv9feTXf7pffvldHfKv0X+3TWvdaDJl8Ovfe/b3/9/ALtgAvWMAAAA
1B476B521AC12251C2B002A5290323A5	1	cxsmiles	JChemExcelkAAAAB+LCAAAAAAABADtvQdgHEmWJSYvbcp7f0r1StfgdKEIgGATJNiQQBDswYjN5pLsHWlHIymrKoHKZVZlXWYWQMztnbz33nvvvffee++997o7nU4n99//P1xmZAFs9s5K2smeIYCqyB8/fnwfPyK+9+3vf3myuzXdm27Rr3fCf7884V/4H/5kD/96H9786273kxdbHaDhn/8P9C+w5ZAAAAA=
C29C9F89025057FA0E998D74AB4AA9D6	1	cxsmiles	JChemExcelzAAAAB+LCAAAAAAABADtvQdgHEmWJSYvbcp7f0r1StfgdKEIgGATJNiQQBDswYjN5pLsHWlHIymrKoHKZVZlXWYWQMztnbz33nvvvffee++997o7nU4n99//P1xmZAFs9s5K2smeIYCqyB8/fnwfPyK+9+3vT3enW/Tjjvn3yxP+hf/xfn2xd7L12Zd3Xmy9+OxkL96k8+cwnOjnW9N7ISLy70l5Z3qvC27P9qfNdr/37e//P5EhU3PMAAAA
08E91E73F7C2BCC8528729C3F2A37DE0	1	cxsmiles	JChemExcel9gAAAB+LCAAAAAAABADtvQdgHEmWJSYvbcp7f0r1StfgdKEIgGATJNiQQBDswYjN5pLsHWlHIymrKoHKZVZlXWYWQMztnbz33nvvvffee++997o7nU4n99//P1xmZAFs9s5K2smeIYCqyB8/fnwfPyK+9+3vT3enW/Tjjv67N7033Vqa33fx82SX/3yxdcI/+Z+Te/yDf/U+3dvqfiK/fnmy9dmXdwBauvrSa3LrT+6FAIMv9U/upvedYrVrPvl/AFN4py/2AAAA
6BF172FA01D8D68D6CAB970511765DD4	1	cxsmiles	JChemExcelZgAAAB+LCAAAAAAABADtvQdgHEmWJSYvbcp7f0r1StfgdKEIgGATJNiQQBDswYjN5pLsHWlHIymrKoHKZVZlXWYWQMztnbz33nvvvffee++997o7nU4n99//P1xmZAFs9s5K2smeIYCqyB8/fnwfPyK+9+3vv9g62aIfd/gf/F//jH8a/fWzkw2tv/ft7/8/X3wuZmYAAAA=
B8790744A7495E1A438F3B979AAEC3F2	1	cxsmiles	JChemExcelcgAAAB+LCAAAAAAABADtvQdgHEmWJSYvbcp7f0r1StfgdKEIgGATJNiQQBDswYjN5pLsHWlHIymrKoHKZVZlXWYWQMztnbz33nvvvffee++997o7nU4n99//P1xmZAFs9s5K2smeIYCqyB8/fnwfPyK+9+3vv9g62aIfd/gf/F//jH/Kv+5udT+58Vd55Xvf/v7/AzgA++pyAAAA
A414F103021DE3E662C7BE96DBF00B1F	1	cxsmiles	JChemExcelAgEAAB+LCAAAAAAABADtvQdgHEmWJSYvbcp7f0r1StfgdKEIgGATJNiQQBDswYjN5pLsHWlHIymrKoHKZVZlXWYWQMztnbz33nvvvffee++997o7nU4n99//P1xmZAFs9s5K2smeIYCqyB8/fnwfPyK+9+3vT3enW/TjznRvem+6tTS/y8/dL0/4F/4H/z/Z5V9fbHmfn9xzX3uf7m11P5FfCeRnX95BZ9zFVreLW31yLwQY4ih/cje97xSrXfPJ/wPIHu/uAgEAAA==
DACAD93705ABA4DB5B3D12DFA581AC35	1	cxsmiles	JChemExcelowAAAB+LCAAAAAAABADtvQdgHEmWJSYvbcp7f0r1StfgdKEIgGATJNiQQBDswYjN5pLsHWlHIymrKoHKZVZlXWYWQMztnbz33nvvvffee++997o7nU4n99//P1xmZAFs9s5K2smeIYCqyB8/fnwfPyK+9+3vT3enW1+ebNFvd/gf/D/2Cf+7N931vvB+fRH5/GTrsy/9Nid7u523bMOgr/DP/wf+rKcHowAAAA==
123AEE5B872B736FFB426EC0F99485E2	1	cxsmiles	JChemExcelcQEAAB+LCAAAAAAABADtvQdgHEmWJSYvbcp7f0r1StfgdKEIgGATJNiQQBDswYjN5pLsHWlHIymrKoHKZVZlXWYWQMztnbz33nvvvffee++997o7nU4n99//P1xmZAFs9s5K2smeIYCqyB8/fnwfPyK+9+3vf3myRf/e2TrZ+uzLO1+e7PJf9MfJnn5hGuAf/e7LOyf3tnofD7S2f57s8w+/BX30pcDrvHVP0TAwqcn03pT/jPx7Txp/KQPZdWD2BrDc/OcLQwMQpAvhBojT3UEsd7/37e//P/mSYQRxAQAA
1A1A52BD314F040F4AA50087DDF295BA	1	cxsmiles	JChemExcelbwEAAB+LCAAAAAAABADtvQdgHEmWJSYvbcp7f0r1StfgdKEIgGATJNiQQBDswYjN5pLsHWlHIymrKoHKZVZlXWYWQMztnbz33nvvvffee++997o7nU4n99//P1xmZAFs9s5K2smeIYCqyB8/fnwfPyK+9+3vf3myu3WyRb/c4X+8Xzt/vtjrN6N3Iy1PCOBnX975sgNra7q75D+m96bys//vvemuD2jPvjzd1RZ70y39bbfbwQsdCPWtiJ3sRZDmpvd6n392on8MU2PrZO+e9/GXPMwuxXa3vpQ2fRL8PxwvdgVvAQAA
4B8930905CEBCEEFF50BC47A381A0FC1	1	cxsmiles	JChemExcelXwAAAB+LCAAAAAAABADtvQdgHEmWJSYvbcp7f0r1StfgdKEIgGATJNiQQBDswYjN5pLsHWlHIymrKoHKZVZlXWYWQMztnbz33nvvvffee++997o7nU4n99//P1xmZAFs9s5K2smeIYCqyB8/fnwfPyK+9+3vv9g62frsyztfnmzRH3f4H/x/uruc7k35T/Ov/txb7uInvzXdDZt4/6LR/wOd7+/AXwAAAA==
CC5930CA9BE9EC14BB8F4236691AAC14	1	cxsmiles	JChemExcelYAAAAB+LCAAAAAAABADtvQdgHEmWJSYvbcp7f0r1StfgdKEIgGATJNiQQBDswYjN5pLsHWlHIymrKoHKZVZlXWYWQMztnbz33nvvvffee++997o7nU4n99//P1xmZAFs9s5K2smeIYCqyB8/fnwfPyK+9+3vv9g62frsyztfnmzRH3f4H/x/uruc7k35T/Pva69J/Fev9d5y93vf/v7/A3J6ckVgAAAA
61D1F057DD77C3974DE861DF77A5C2CD	1	cxsmiles	JChemExceleQAAAB+LCAAAAAAABADtvQdgHEmWJSYvbcp7f0r1StfgdKEIgGATJNiQQBDswYjN5pLsHWlHIymrKoHKZVZlXWYWQMztnbz33nvvvffee++997o7nU4n99//P1xmZAFs9s5K2smeIYCqyB8/fnwfPyK+9+3vn+x+drL15ckW/XqH/8H/T/a2vpzem26d7H325Z1p7+vplvzb+/zeSXlHP+tCdH9Sj1/+P7PZNe55AAAA
C87870F652D4C5E5EB466CCD0CF4866D	1	cxsmiles	JChemExcelWwEAAB+LCAAAAAAABADtvQdgHEmWJSYvbcp7f0r1StfgdKEIgGATJNiQQBDswYjN5pLsHWlHIymrKoHKZVZlXWYWQMztnbz33nvvvffee++997o7nU4n99//P1xmZAFs9s5K2smeIYCqyB8/fnwfPyK+9+3vf3myRf/e2TrZ+uzLO1+e7PJf9MfJnn7xpX7w5Z2Te1v6Gf6Rj/0m9quTff5hQOtHXwqQDoR72qEA4ibTe1P+M/LvPWnMHW4psvzR3gBqm/98YUaLoXch3ABxujuI5e73vv39/wclqHj0WwEAAA==
521B2A5EE6E50D8069A423AF828F4C9E	1	cxsmiles	JChemExcelXwEAAB+LCAAAAAAABADtvQdgHEmWJSYvbcp7f0r1StfgdKEIgGATJNiQQBDswYjN5pLsHWlHIymrKoHKZVZlXWYWQMztnbz33nvvvffee++997o7nU4n99//P1xmZAFs9s5K2smeIYCqyB8/fnwfPyK+9+3vf3myu0U/7pxsfYkfWydbn3155wV/xB/v8a8vtqb3pvzbdOvLE/7FNplu6Tf3Tvb2vO+8X1/c633+mfyg3uOvSOf3bBvCqtfx3lI7Nqj1/r03HcIo8nnwiaHGMG7u1133a9Do/wFIDnrhXwEAAA==
A1BCA5991B828077F50A0875B5A9AFFE	1	cxsmiles	JChemExcel/gAAAB+LCAAAAAAABADtvQdgHEmWJSYvbcp7f0r1StfgdKEIgGATJNiQQBDswYjN5pLsHWlHIymrKoHKZVZlXWYWQMztnbz33nvvvffee++997o7nU4n99//P1xmZAFs9s5K2smeIYCqyB8/fnwfPyK+9+3vf3myu0U/7pzwv/rrZ1/eeeF/Sp/Ib9O95XSrme513tj858ke//iSfm5otOnX+Gtfhhh+eYeGcmukvvft7/8/fzMAJ/4AAAA=
4220B6C750440C9E207FD63A51FC2D0C	1	cxsmiles	JChemExcelYAEAAB+LCAAAAAAABADtvQdgHEmWJSYvbcp7f0r1StfgdKEIgGATJNiQQBDswYjN5pLsHWlHIymrKoHKZVZlXWYWQMztnbz33nvvvffee++997o7nU4n99//P1xmZAFs9s5K2smeIYCqyB8/fnwfPyK+9+3vf3myu3Wy9dmXd7482aI/7/A/+P/JHv/6Ymt6b8q/Tbe6TaZb+s29k7097zvv1xf3ep9/dqJ/xN/gX0727vHHu/zRl4xgF78BvKd7S0XKoN37997Ux/ZFiLpFTxHxO7S/DmIe/vn/AN0euSVgAQAA
656D4EE68169AA0BE656496F8887D425	1	cxsmiles	JChemExcelpQAAAB+LCAAAAAAABADtvQdgHEmWJSYvbcp7f0r1StfgdKEIgGATJNiQQBDswYjN5pLsHWlHIymrKoHKZVZlXWYWQMztnbz33nvvvffee++997o7nU4n99//P1xmZAFs9s5K2smeIYCqyB8/fnwfPyK+9+3vv9g62frsyzsnW/T7Hf4H/z/Z5V9P9j6TL7TNl51m9lv5Y2+6N+21ud0n/O+e97Fi8L1vf///AQJ6FVGlAAAA
F40B28C140CCFBF925EDF30C111E1775	1	cxsmiles	JChemExcelpgAAAB+LCAAAAAAABADtvQdgHEmWJSYvbcp7f0r1StfgdKEIgGATJNiQQBDswYjN5pLsHWlHIymrKoHKZVZlXWYWQMztnbz33nvvvffee++997o7nU4n99//P1xmZAFs9s5K2smeIYCqyB8/fnwfPyK+9+3vv9iif+6c8L/dX7/0P9797GTrZOuzL8NP3a/en9O9Kf8S+XfvpDStesAEwmcvdjtg/x/KZYI2pgAAAA==
59E75A8E255166AE190191EC73DE942F	1	cxsmiles	JChemExcelrQAAAB+LCAAAAAAABADtvQdgHEmWJSYvbcp7f0r1StfgdKEIgGATJNiQQBDswYjN5pLsHWlHIymrKoHKZVZlXWYWQMztnbz33nvvvffee++997o7nU4n99//P1xmZAFs9s5K2smeIYCqyB8/fnwfPyK+9+3vn2x9drJFP+/Iv/zPi13vD//zLf/zXf7hNZnuTvmXyL+78u8Hff//AIYp5GatAAAA
A64055ADC28032A3CA333D60967DD24D	1	cxsmiles	JChemExcelogAAAB+LCAAAAAAABADtvQdgHEmWJSYvbcp7f0r1StfgdKEIgGATJNiQQBDswYjN5pLsHWlHIymrKoHKZVZlXWYWQMztnbz33nvvvffee++997o7nU4n99//P1xmZAFs9s5K2smeIYCqyB8/fnwfPyK+9+3vT3enW/TjznTrpDT/THfxyckuf3GydbL12Zd3vjzhv/ifL/kT74P4r/j/ZydbLz4DiOBTC7oDuA/g/wHDK+S3ogAAAA==
57B1C5D6FC1B8424218769843D536A08	1	cxsmiles	JChemExcelDgEAAB+LCAAAAAAABADtvQdgHEmWJSYvbcp7f0r1StfgdKEIgGATJNiQQBDswYjN5pLsHWlHIymrKoHKZVZlXWYWQMztnbz33nvvvffee++997o7nU4n99//P1xmZAFs9s5K2smeIYCqyB8/fnwfPyK+9+3vv9ia7k636Jc7+u9eNd2abp1sffblnem94JutL0/4F/4n/uuLrRubeL/eqlGnveJyT3Cd7t7qxQ6M1xgc/h9+/v8AnMrQ9w4BAAA=
47F2152C854BF40BABF475977A1F439F	1	cxsmiles	JChemExcelkAAAAB+LCAAAAAAABADtvQdgHEmWJSYvbcp7f0r1StfgdKEIgGATJNiQQBDswYjN5pLsHWlHIymrKoHKZVZlXWYWQMztnbz33nvvvffee++997o7nU4n99//P1xmZAFs9s5K2smeIYCqyB8/fnwfPyK+9+3vv9g92frsZIv++fLOlydb9Mkd/gf/1z8738YbmT8/O9ntfDLdnfLvwb97y2o53d3rvP3/ALQvMYyQAAAA
9E0B78F25A5FB56C665BDCD2D8FCF75F	1	cxsmiles	JChemExceljAAAAB+LCAAAAAAABADtvQdgHEmWJSYvbcp7f0r1StfgdKEIgGATJNiQQBDswYjN5pLsHWlHIymrKoHKZVZlXWYWQMztnbz33nvvvffee++997o7nU4n99//P1xmZAFs9s5K2smeIYCqyB8/fnwfPyK+9+3vT3enW/TjznTL/tzFz5Nd/vNk62Trsy/vfHnCf/E/+P9nJ1svPsN3waf2He+NbpPOnz/+4s4LNP/sy/8HtYnmVIwAAAA=
EB9B70A65FD4BA899F15B9BB6E5B0AEA	1	cxsmiles	JChemExcel6wAAAB+LCAAAAAAABADtvQdgHEmWJSYvbcp7f0r1StfgdKEIgGATJNiQQBDswYjN5pLsHWlHIymrKoHKZVZlXWYWQMztnbz33nvvvffee++997o7nU4n99//P1xmZAFs9s5K2smeIYCqyB8/fnwfPyK+9+3vT3enW/Tjjv67t9S/ltO96S5+PeEPtoZ/fbHl/bHhjd2tL0+2PvvS/+zLW71JmChSzwya+jnB9NoOA/vet7///wDZXhtc6wAAAA==
446FE993967F6A42156807A1F831EA9A	1	cxsmiles	JChemExcelrgAAAB+LCAAAAAAABADtvQdgHEmWJSYvbcp7f0r1StfgdKEIgGATJNiQQBDswYjN5pLsHWlHIymrKoHKZVZlXWYWQMztnbz33nvvvffee++997o7nU4n99//P1xmZAFs9s5K2smeIYCqyB8/fnwfPyK+9+3vT3enW/TjznTL/tzFz5Nd/vNk62Trsy/vfHnCf+lH9lf/Y/z/s5OtF5/hleBTC8oD1G2y8c8XePOzL/8fIT9eYK4AAAA=
D5CD7510A7013C8DC85BD9856FE228C8	1	cxsmiles	JChemExcelogAAAB+LCAAAAAAABADtvQdgHEmWJSYvbcp7f0r1StfgdKEIgGATJNiQQBDswYjN5pLsHWlHIymrKoHKZVZlXWYWQMztnbz33nvvvffee++997o7nU4n99//P1xmZAFs9s5K2smeIYCqyB8/fnwfPyK+9+3vT3enW/TjjvmX/tvFby+2PvvyDv3vZJe/ONk6wQdfnvBf+hH/6n3ifWr+/Oxk68VneDlsZIB2QPYB/D9mpasxogAAAA==
5EF6B8A788B2C50B25B7CFE4FD2BB07E	1	cxsmiles	JChemExceljAAAAB+LCAAAAAAABADtvQdgHEmWJSYvbcp7f0r1StfgdKEIgGATJNiQQBDswYjN5pLsHWlHIymrKoHKZVZlXWYWQMztnbz33nvvvffee++997o7nU4n99//P1xmZAFs9s5K2smeIYCqyB8/fnwfPyK+9+3vT3enW/TjznTL/tzFz5Nd/vNk62Trsy/vfHnCf+lH9lf8/7OTrRefoVnwqX2983IEwAu0+ezL/wfa1fuCjAAAAA==
815FB36145D8E7D598A52164F8F537EB	1	cxsmiles	JChemExcelfAAAAB+LCAAAAAAABADtvQdgHEmWJSYvbcp7f0r1StfgdKEIgGATJNiQQBDswYjN5pLsHWlHIymrKoHKZVZlXWYWQMztnbz33nvvvffee++997o7nU4n99//P1xmZAFs9s5K2smeIYCqyB8/fnwfPyK+9+3vf3my9dmXd0626Nc7/M/J7mcnW/ShfDTdm8pP/Vd/7uHf1503Y+2fmd929zpN/x8uhexvfAAAAA==
838D2229FCE7F42FE2546ACCB2FC1926	1	cxsmiles	JChemExcel2AAAAB+LCAAAAAAABADtvQdgHEmWJSYvbcp7f0r1StfgdKEIgGATJNiQQBDswYjN5pLsHWlHIymrKoHKZVZlXWYWQMztnbz33nvvvffee++997o7nU4n99//P1xmZAFs9s5K2smeIYCqyB8/fnwfPyK+9+3vf3my9dmXd0626Nc7n8mPW/9BL355sut90/t1b+tL+j9+9b7RV770GvK3u1uD0KjLbutNf/4/yW/BV9gAAAA=
D74DBC4C3B0467397694441A6880F883	1	cxsmiles	JChemExcelrwAAAB+LCAAAAAAABADtvQdgHEmWJSYvbcp7f0r1StfgdKEIgGATJNiQQBDswYjN5pLsHWlHIymrKoHKZVZlXWYWQMztnbz33nvvvffee++997o7nU4n99//P1xmZAFs9s5K2smeIYCqyB8/fnwfPyK+9+3vf3myRf/e4X+8X1/sDny+Nd1bTrfofy/47+k9+pV/2WruUcPPvrxjvphunZR3zJfev/c8cPzBXqePzp8nu+bT/we3pPHjrwAAAA==
051655A3D5DEB60C52160AB65ACB7DF0	1	cxsmiles	JChemExcelxAAAAB+LCAAAAAAABADtvQdgHEmWJSYvbcp7f0r1StfgdKEIgGATJNiQQBDswYjN5pLsHWlHIymrKoHKZVZlXWYWQMztnbz33nvvvffee++997o7nU4n99//P1xmZAFs9s5K2smeIYCqyB8/fnwfPyK+9+3vv9ia7k636Jc7060vT/gX/kc+OSnv6Je7+JVanvz4C/1oOd2LvRj/9cW9gc+3On36ze55mPRxE7T2/h/9xYPqxAAAAA==
1BE78B33C90646DD345CD9F569924C6D	1	cxsmiles	JChemExcelwAAAAB+LCAAAAAAABADtvQdgHEmWJSYvbcp7f0r1StfgdKEIgGATJNiQQBDswYjN5pLsHWlHIymrKoHKZVZlXWYWQMztnbz33nvvvffee++997o7nU4n99//P1xmZAFs9s5K2smeIYCqyB8/fnwfPyK+9+3vv9g62frsyzvT3ekW/XXH/DvdOvnxk+me/Lmc3gu/5Q+Xe/foNfx6wh/wP/x9D5Zp9uwO/e+Z3/7FrveH//lWB6jfbNd8+v8AwdWb1MAAAAA=
5DFC26312512C5991F6D5C87B63C9A47	1	cxsmiles	JChemExceliQAAAB+LCAAAAAAABADtvQdgHEmWJSYvbcp7f0r1StfgdKEIgGATJNiQQBDswYjN5pLsHWlHIymrKoHKZVZlXWYWQMztnbz33nvvvffee++997o7nU4n99//P1xmZAFs9s5K2smeIYCqyB8/fnwfPyK+9+3vT3enW/Tjjv67d7L12Zd3TviPLf2d/pnuTXfx0ckuf6Pfx3+ltj7ErZPSAu++INC+9+3v/z+nnu0WiQAAAA==
A3AB60130000A556591EB676B6E4E2D8	1	cxsmiles	JChemExcelTQAAAB+LCAAAAAAABADtvQdgHEmWJSYvbcp7f0r1StfgdKEIgGATJNiQQBDswYjN5pLsHWlHIymrKoHKZVZlXWYWQMztnbz33nvvvffee++997o7nU4n99//P1xmZAFs9s5K2smeIYCqyB8/fnwfPyK+9+3vv9g62frsyzsnW/T7na2TH39xx/8b/+D/090p/27+1Z+7+Pdk69kd+t+z/we7JDDPTQAAAA==
3552813007FA8BE7960A74C92A64AF63	1	cxsmiles	JChemExcelSQAAAB+LCAAAAAAABADtvQdgHEmWJSYvbcp7f0r1StfgdKEIgGATJNiQQBDswYjN5pLsHWlHIymrKoHKZVZlXWYWQMztnbz33nvvvffee++997o7nU4n99//P1xmZAFs9s5K2smeIYCqyB8/fnwfPyK+9+3vv9g62frsyzvT3ekW/XVnWU13T/g3/gf/N1+Zf/XnLv492Xp2h/737P8B8u6e4EkAAAA=

## Sheet: Table S2
Table S2. Dataset of known schistosomicidal compounds, with SMILES, references, molecular descriptors and cluster analysis results.
IUPAC name	SMILES	Reference	Outcome	Descritpor matrix																																							Fit cluster
				SlogP	SMR	LabuteASA	TPSA	AMW	ExactMW	NumLipinskiHBA	NumLipinskiHBD	NumRotatableBonds	NumHBD	NumHBA	NumAmideBonds	NumHeteroAtoms	NumHeavyAtoms	NumAtoms	NumRings	NumAromaticRings	NumSaturatedRings	NumAliphaticRings	NumAromaticHeterocycles	NumSaturatedHeterocycles	NumAliphaticHeterocycles	NumAromaticCarbocycles	NumSaturatedCarbocycles	NumAliphaticCarbocycles	FractionCSP3	Chi0v	Chi1v	Chi2v	Chi3v	Chi4v	Chi1n	Chi2n	Chi3n	Chi4n	HallKierAlpha	kappa1	kappa2	kappa3
(3R,6S)-1,3,6-trimethyl-7-(prop-2-yn-1-yl)-2,4,5,10-tetraoxatricyclo[4.3.1.0?,?]decane	[H]C#CC([H])([H])C12C([H])([H])C([H])([H])C3(OC1(OOC2(O3)C([H])([H])[H])C([H])([H])[H])C([H])([H])[H]	AID:704018	Active	-0.649099	-0.966875	-0.787993	-0.734173	-0.807524	-0.806812	-0.474587	-0.693538	-0.818178	-0.69215	-0.418741	-0.360463	-0.68551	-0.780982	-0.52593	0.496336	-1.59923	2.19113	1.77264	-0.958403	3.59412	3.02087	-1.32275	-0.329143	-0.376823	1.7482	-0.704591	-0.752609	-0.421161	-0.234801	-0.117237	-0.615465	-0.243004	-0.0481587	0.069224	1.44126	-0.719124	-1.04789	-0.878845	5
3-methyl-N-[3-(prop-2-yn-1-yl)-6-sulfamoyl-2,3-dihydro-1,3-benzothiazol-2-ylidene]-1,2-oxazole-5-carboxamide	[H]C#CC([H])([H])N1C(Sc2c([H])c(c([H])c([H])c12)S(=O)(=O)N([H])[H])=NC(=O)c1onc(c1[H])C([H])([H])[H]	AID: 685510	Active	-1.18776	-0.0270034	0.053496	1.02535	0.236954	0.236971	0.85015	0.333968	-0.118101	-0.129583	0.737598	0.769739	1.19886	0.0882375	-0.306347	-0.183772	0.572358	-0.496259	-0.639861	0.988589	-0.445072	-0.596963	-0.242784	-0.329143	-0.376823	-0.70377	0.051328	0.19547	0.239268	0.0761957	0.080179	-0.2734	-0.317957	-0.420695	-0.453049	-0.483778	0.0702448	-0.0920709	-0.0189691	4
7-hexyl-1,4-dimethyl-2,3,5,6-tetraoxabicyclo[2.2.1]heptane	[H]C([H])([H])C([H])([H])C([H])([H])C([H])([H])C([H])([H])C([H])([H])C1([H])C2(OOC1(OO2)C([H])([H])[H])C([H])([H])[H]	AID:704018	Active	-0.0780348	-0.99967	-0.860974	-0.734173	-0.862294	-0.86156	-0.474587	-0.693538	0.115258	-0.69215	-0.418741	-0.360463	-0.68551	-0.877562	-0.39418	-0.863881	-1.59923	0.847435	0.566391	-0.958403	1.57452	1.21196	-1.32275	-0.329143	-0.376823	2.33201	-0.718204	-0.688702	-0.590337	-0.574051	-0.552349	-0.551128	-0.413573	-0.389306	-0.367109	1.83706	-0.624888	-0.684634	-0.531721	5
7-butyl-1,4-dimethyl-2,3,5,6-tetraoxabicyclo[2.2.1]heptane	[H]C([H])([H])C([H])([H])C([H])([H])C([H])([H])C1([H])C2(OOC1(OO2)C([H])([H])[H])C([H])([H])[H]	AID:704018	Active	-0.531792	-1.23756	-1.07073	-0.734173	-1.05486	-1.05415	-0.474587	-0.693538	-0.35146	-0.69215	-0.418741	-0.360463	-0.68551	-1.07072	-0.65768	-0.863881	-1.59923	0.847435	0.566391	-0.958403	1.57452	1.21196	-1.32275	-0.329143	-0.376823	2.33201	-0.942617	-0.946149	-0.792459	-0.748592	-0.709106	-0.810307	-0.617358	-0.564823	-0.524306	1.83706	-0.857802	-0.971104	-0.749834	5
(3S,6R)-7-butyl-1,3,6-trimethyl-2,4,5,10-tetraoxatricyclo[4.3.1.0?,?]decane	[H]C([H])([H])C([H])([H])C([H])([H])C([H])([H])C12C([H])([H])C([H])([H])C3(OC1(OOC2(O3)C([H])([H])[H])C([H])([H])[H])C([H])([H])[H]	AID:704018	Active	0.0295596	-0.81037	-0.666622	-0.734173	-0.683563	-0.682822	-0.474587	-0.693538	-0.35146	-0.69215	-0.418741	-0.360463	-0.68551	-0.684402	-0.218513	0.496336	-1.59923	2.19113	1.77264	-0.958403	3.59412	3.02087	-1.32275	-0.329143	-0.376823	2.33201	-0.492452	-0.47846	-0.214595	-0.0416647	0.0852037	-0.339471	-0.0347383	0.146058	0.272233	1.83706	-0.555587	-0.888188	-0.75524	5
disulfiram	[H]C([H])([H])C([H])([H])N(C(=S)SSC(=S)N(C([H])([H])C([H])([H])[H])C([H])([H])C([H])([H])[H])C([H])([H])C([H])([H])[H]	PMID: 572149	Active	0.324543	-0.154132	-0.412492	-1.37461	-0.311269	-0.312515	-1.13696	-0.693538	1.04869	-0.69215	-0.418741	-0.360463	-0.0573867	-0.780982	-0.350263	-2.2241	-1.59923	-0.496259	-0.639861	-0.958403	-0.445072	-0.596963	-1.32275	-0.329143	-0.376823	1.63144	-0.103151	-0.00710958	-0.112162	0.334089	0.230241	-0.63376	-0.910455	-0.78597	-0.892507	2.41277	-0.00390344	0.747631	0.787802	5
ethyl 3-{1,4-dimethyl-2,3,5,6-tetraoxabicyclo[2.2.1]heptan-7-yl}propanoate	[H]C([H])([H])C([H])([H])OC(=O)C([H])([H])C([H])([H])C1([H])C2(OOC1(OO2)C([H])([H])[H])C([H])([H])[H]	AID:704018	Active	-1.02434	-1.07417	-0.813022	-0.180837	-0.752775	-0.751919	0.187781	-0.693538	0.115258	-0.69215	0.352152	-0.360463	-0.0573867	-0.780982	-0.52593	-0.863881	-1.59923	0.847435	0.566391	-0.958403	1.57452	1.21196	-1.32275	-0.329143	-0.376823	1.98172	-0.73371	-0.80443	-0.734871	-0.715042	-0.671903	-0.667635	-0.559296	-0.531085	-0.486999	1.3603	-0.569871	-0.699582	-0.56515	5
ethyl 3-[(3R,6S)-1,3,6-trimethyl-2,4,5,10-tetraoxatricyclo[4.3.1.0?,?]decan-7-yl]propanoate	[H]C([H])([H])C([H])([H])OC(=O)C([H])([H])C([H])([H])C12C([H])([H])C([H])([H])C3(OC1(OOC2(O3)C([H])([H])[H])C([H])([H])[H])C([H])([H])[H]	AID:704018	Active	-0.46299	-0.646987	-0.40891	-0.180837	-0.381476	-0.380596	0.187781	-0.693538	0.115258	-0.69215	0.352152	-0.360463	-0.0573867	-0.394662	-0.0867633	0.496336	-1.59923	2.19113	1.77264	-0.958403	3.59412	3.02087	-1.32275	-0.329143	-0.376823	2.08181	-0.283545	-0.336741	-0.157006	-0.00531848	0.115126	-0.196799	0.023324	0.182607	0.30224	1.3603	-0.272048	-0.646382	-0.61216	5
triptonide	[H]C([H])([H])C([H])(C([H])([H])[H])C12OC1([H])C1([H])OC11C3(OC3([H])C([H])([H])C3([H])C4=C(C(=O)OC4([H])[H])C([H])([H])C([H])([H])C13C([H])([H])[H])C2=O	PMID: 19597541	Active	-1.01888	-0.157481	0.12819	0.192401	0.113199	0.114071	0.187781	-0.693538	-0.818178	-0.69215	0.352152	-0.360463	-0.0573867	0.184818	0.176737	2.53666	-1.59923	2.86298	3.58202	-0.958403	2.58432	3.02087	-1.32275	1.88064	2.4431	1.63144	0.141673	0.33471	0.824631	1.27421	1.60286	0.479169	1.01304	1.46929	1.79415	0.865547	-0.209688	-0.769556	-0.813419	2
ethyl 2-(tert-butylperoxy)-2-cyano-4-oxopentanoate	[H]C([H])([H])C(=O)C([H])([H])C(OOC(C([H])([H])[H])(C([H])([H])[H])C([H])([H])[H])(C#N)C(=O)OC([H])([H])C([H])([H])[H]	AID:704018	Active	-0.887214	-0.772989	-0.596516	0.290445	-0.580799	-0.579942	0.187781	-0.693538	0.815335	-0.69215	0.352152	-0.360463	-0.0573867	-0.587822	-0.306347	-2.2241	-1.59923	-0.496259	-0.639861	-0.958403	-0.445072	-0.596963	-1.32275	-0.329143	-0.376823	1.4563	-0.455297	-0.747593	-0.57606	-1.14652	-1.12175	-0.610416	-0.399178	-0.964977	-0.938113	0.676641	0.00453567	-0.0429864	0.631366	5
ethyl 2-acetyl-2-(tert-butylperoxy)hexanoate	[H]C([H])([H])C(=O)C(OOC(C([H])([H])[H])(C([H])([H])[H])C([H])([H])[H])(C(=O)OC([H])([H])C([H])([H])[H])C([H])([H])C([H])([H])C([H])([H])C([H])([H])[H]	AID:704018	Active	-0.144801	-0.53353	-0.459135	-0.210082	-0.46362	-0.46279	-0.143403	-0.693538	1.28205	-0.69215	-0.0332944	-0.360463	-0.371448	-0.491242	0.0449866	-2.2241	-1.59923	-0.496259	-0.639861	-0.958403	-0.445072	-0.596963	-1.32275	-0.329143	-0.376823	1.8316	-0.222508	-0.456692	-0.384789	-0.876818	-0.954369	-0.317558	-0.206333	-0.693766	-0.770258	1.13541	0.186579	0.251146	0.785976	5
2-(tert-butylperoxy)-2-cyclopentylpropanedinitrile	[H]C([H])([H])C(OOC(C#N)(C#N)C1([H])C([H])([H])C([H])([H])C([H])([H])C1([H])[H])(C([H])([H])[H])C([H])([H])[H]	AID:704018	Active	-0.205834	-0.885312	-0.762115	-0.121506	-0.821033	-0.820333	-0.474587	-0.693538	-0.118101	-0.69215	-0.418741	-0.360463	-0.68551	-0.780982	-0.438096	-1.54399	-1.59923	0.175588	-0.0367353	-0.958403	-0.445072	-0.596963	-1.32275	0.77575	0.563152	1.7482	-0.65936	-0.744113	-0.460991	-0.808677	-0.779142	-0.606913	-0.283163	-0.625244	-0.594538	0.991484	-0.427412	-0.473765	-0.172119	5
3-{1,4-dimethyl-2,3,5,6-tetraoxabicyclo[2.2.1]heptan-7-yl}propanenitrile	[H]C([H])([H])C12OOC(OO1)(C([H])([H])[H])C2([H])C([H])([H])C([H])([H])C#N	AID:704018	Active	-1.04733	-1.35807	-1.10323	-0.233646	-1.07576	-1.075	-0.143403	-0.693538	-0.584819	-0.69215	-0.0332944	-0.360463	-0.371448	-1.07072	-0.877263	-0.863881	-1.59923	0.847435	0.566391	-0.958403	1.57452	1.21196	-1.32275	-0.329143	-0.376823	1.89415	-1.0632	-1.10833	-0.919786	-0.853853	-0.794261	-0.973576	-0.745733	-0.670673	-0.6097	1.37829	-0.916817	-1.0388	-0.79894	5
1-(azepan-1-yl)-3-{1,4-dimethyl-2,3,5,6-tetraoxabicyclo[2.2.1]heptan-7-yl}propan-1-one	[H]C([H])([H])C12OOC(OO1)(C([H])([H])[H])C2([H])C([H])([H])C([H])([H])C(=O)N1C([H])([H])C([H])([H])C([H])([H])C([H])([H])C([H])([H])C1([H])[H]	AID:704018	Active	-0.536096	-0.599765	-0.399425	-0.306863	-0.388231	-0.387356	0.187781	-0.693538	-0.118101	-0.69215	-0.0332944	0.769739	-0.0573867	-0.394662	-0.0428467	-0.183772	-1.59923	1.51928	1.16952	-0.958403	2.58432	2.11641	-1.32275	-0.329143	-0.376823	2.08181	-0.325178	-0.249334	-0.166047	-0.134453	-0.137692	-0.108805	0.014209	0.0527504	0.0487117	1.3603	-0.272048	-0.3609	-0.343283	5
3-{1,4-dimethyl-2,3,5,6-tetraoxabicyclo[2.2.1]heptan-7-yl}-1-(piperidin-1-yl)propan-1-one	[H]C([H])([H])C12OOC(OO1)(C([H])([H])[H])C2([H])C([H])([H])C([H])([H])C(=O)N1C([H])([H])C([H])([H])C([H])([H])C([H])([H])C1([H])[H]	AID:704018	Active	-0.762975	-0.718709	-0.504306	-0.306863	-0.484515	-0.483649	0.187781	-0.693538	-0.118101	-0.69215	-0.0332944	0.769739	-0.0573867	-0.491242	-0.174597	-0.183772	-1.59923	1.51928	1.16952	-0.958403	2.58432	2.11641	-1.32275	-0.329143	-0.376823	2.06256	-0.437384	-0.378058	-0.267108	-0.221724	-0.213201	-0.238394	-0.0876839	-0.0350083	-0.0270088	1.3603	-0.387239	-0.506556	-0.408874	5
3-{1,4-dimethyl-2,3,5,6-tetraoxabicyclo[2.2.1]heptan-7-yl}-1-(pyrrolidin-1-yl)propan-1-one	[H]C([H])([H])C12OOC(OO1)(C([H])([H])[H])C2([H])C([H])([H])C([H])([H])C(=O)N1C([H])([H])C([H])([H])C([H])([H])C1([H])[H]	AID:704018	Active	-0.989854	-0.837652	-0.609186	-0.306863	-0.580799	-0.579942	0.187781	-0.693538	-0.118101	-0.69215	-0.0332944	0.769739	-0.0573867	-0.587822	-0.306347	-0.183772	-1.59923	1.51928	1.16952	-0.958403	2.58432	2.11641	-1.32275	-0.329143	-0.376823	2.0401	-0.549591	-0.506781	-0.368169	-0.308994	-0.288709	-0.367984	-0.189577	-0.122767	-0.102729	1.3603	-0.501902	-0.646375	-0.558411	5
3-{1,4-dimethyl-2,3,5,6-tetraoxabicyclo[2.2.1]heptan-7-yl}-1-(morpholin-4-yl)propan-1-one	[H]C([H])([H])C12OOC(OO1)(C([H])([H])[H])C2([H])C([H])([H])C([H])([H])C(=O)N1C([H])([H])C([H])([H])OC([H])([H])C1([H])[H]	AID:704018	Active	-1.43396	-0.796819	-0.524926	-0.11267	-0.470979	-0.470051	0.518965	-0.693538	-0.118101	-0.69215	0.352152	0.769739	0.256675	-0.491242	-0.26243	-0.183772	-1.59923	1.51928	1.16952	-0.958403	2.58432	2.11641	-1.32275	-0.329143	-0.376823	2.0401	-0.484809	-0.486868	-0.395249	-0.34215	-0.354395	-0.347936	-0.216879	-0.156108	-0.168599	1.32432	-0.391836	-0.512264	-0.413324	5
7-(2,3-dibromopropyl)-1,4-dimethyl-2,3,5,6-tetraoxabicyclo[2.2.1]heptane	[H]C([H])([H])C12OOC(OO1)(C([H])([H])[H])C2([H])C([H])([H])C([H])(Br)C([H])([H])Br	AID:704018	Active	-0.323408	-0.938691	-0.718601	-0.734173	-0.0680293	-0.079889	-0.474587	-0.693538	-0.35146	-0.69215	-0.418741	-0.360463	-0.0573867	-0.974142	-0.78943	-0.863881	-1.59923	0.847435	0.566391	-0.958403	1.57452	1.21196	-1.32275	-0.329143	-0.376823	2.33201	-0.498593	-0.525992	-0.281513	0.0056167	-0.515854	-0.915309	-0.662012	-0.63063	-0.603859	2.70063	-0.629566	-0.772965	-0.621277	5
1,4-dimethyl-7-(oxiran-2-ylmethyl)-2,3,5,6-tetraoxabicyclo[2.2.1]heptane	[H]C([H])([H])C12OOC(OO1)(C([H])([H])[H])C2([H])C([H])([H])C1([H])OC1([H])[H]	AID:704018	Active	-1.34678	-1.3707	-1.10793	-0.47055	-1.05516	-1.0544	-0.143403	-0.693538	-0.584819	-0.69215	-0.0332944	-0.360463	-0.371448	-1.07072	-0.833346	-0.183772	-1.59923	1.51928	1.16952	-0.958403	2.58432	2.11641	-1.32275	-0.329143	-0.376823	2.33201	-1.05711	-1.04043	-0.778506	-0.754119	-0.725105	-0.905227	-0.60329	-0.57038	-0.54035	1.80108	-1.00976	-1.14826	-0.831364	5
7-(adamantan-1-yl)-1,4-dimethyl-2,3,5,6-tetraoxabicyclo[2.2.1]heptane	[H]C([H])([H])C12OOC(OO1)(C([H])([H])[H])C2([H])C12C([H])([H])C3([H])C([H])([H])C([H])(C([H])([H])C([H])(C3([H])[H])C1([H])[H])C2([H])[H]	AID:704018	Active	0.0650366	-0.694492	-0.491175	-0.734173	-0.518671	-0.517933	-0.474587	-0.693538	-0.818178	-0.69215	-0.418741	-0.360463	-0.68551	-0.491242	-0.13068	1.85655	-1.59923	3.53482	2.97889	-0.958403	1.57452	1.21196	-1.32275	4.09043	3.38308	2.33201	-0.41049	-0.197438	0.356099	0.520121	1.2861	-0.056559	0.540652	0.710985	1.4765	1.83706	-0.604986	-0.900489	-0.747955	2
(3R,6S)-1,3,6-trimethyl-2,4,5,10-tetraoxatricyclo[4.3.1.0?,?]decane	[H]C([H])([H])C12OOC3(OC(O1)(C([H])([H])[H])C([H])([H])C([H])([H])C23[H])C([H])([H])[H]	AID:704018	Active	-0.877955	-1.28614	-1.08614	-0.734173	-1.0687	-1.06799	-0.474587	-0.693538	-1.05154	-0.69215	-0.418741	-0.360463	-0.68551	-1.07072	-0.745513	0.496336	-1.59923	2.19113	1.77264	-0.958403	3.59412	3.02087	-1.32275	-0.329143	-0.376823	2.33201	-0.975482	-0.974976	-0.630182	-0.572205	-0.347989	-0.839328	-0.453745	-0.387449	-0.162176	1.83706	-1.00534	-1.22825	-0.90404	5
(3R,6S)-1,3,6-trimethyl-7-(oxiran-2-ylmethyl)-2,4,5,10-tetraoxatricyclo[4.3.1.0?,?]decane	[H]C([H])([H])C12OOC3(OC(O1)(C([H])([H])[H])C([H])([H])C([H])([H])C23C([H])([H])C1([H])OC1([H])[H])C([H])([H])[H]	AID:704018	Active	-0.785424	-0.943509	-0.703817	-0.47055	-0.683865	-0.683072	-0.143403	-0.693538	-0.584819	-0.69215	-0.0332944	-0.360463	-0.371448	-0.684402	-0.39418	1.17644	-1.59923	2.86298	2.37577	-0.958403	4.60392	3.92533	-1.32275	-0.329143	-0.376823	2.33201	-0.606944	-0.572745	-0.198612	-0.0587861	0.0808154	-0.434391	-0.0186245	0.12884	0.267833	1.80108	-0.701002	-1.02759	-0.807681	5
artemether	[H]C([H])([H])OC1([H])OC2([H])OC3(OOC22C([H])(C([H])([H])C([H])([H])C([H])(C([H])([H])[H])C2([H])C([H])([H])C3([H])[H])C1([H])C([H])([H])[H])C([H])([H])[H]	PMID: 1841998	Active	-0.129331	-0.473144	-0.284296	-0.539979	-0.298728	-0.297901	-0.143403	-0.693538	-0.818178	-0.69215	-0.0332944	-0.360463	-0.371448	-0.298082	0.13282	1.17644	-1.59923	2.86298	2.37577	-0.958403	3.59412	3.02087	-1.32275	0.77575	0.563152	2.33201	-0.148862	-0.0742829	0.193512	0.463396	0.632901	0.0674246	0.376727	0.653942	0.821468	1.80108	-0.255156	-0.51925	-0.566307	5
malathion	[H]C([H])([H])OP(=S)(OC([H])([H])[H])SC([H])(C(=O)OC([H])([H])C([H])([H])[H])C([H])([H])C(=O)OC([H])([H])C([H])([H])[H]	PMID: 2066529	Active	-0.547495	-0.377103	-0.345613	-0.0158886	-0.0791768	-0.0790245	0.187781	-0.693538	1.51541	-0.69215	1.12304	-0.360463	0.884798	-0.491242	-0.26243	-2.2241	-1.59923	-0.496259	-0.639861	-0.958403	-0.445072	-0.596963	-1.32275	-0.329143	-0.376823	1.63144	-0.0527754	0.320847	0.843223	0.969115	0.55203	-0.603353	-0.874562	-0.897282	-0.915527	1.85505	0.283026	0.802706	1.33335	5
ethyl 2-(tert-butylperoxy)-2-cyanopent-4-enoate	[H]C([H])=C([H])C([H])([H])C(OOC(C([H])([H])[H])(C([H])([H])[H])C([H])([H])[H])(C#N)C(=O)OC([H])([H])C([H])([H])[H]	AID:704018	Active	-0.540004	-0.785458	-0.676451	-0.0686974	-0.69062	-0.689833	-0.143403	-0.693538	0.815335	-0.69215	-0.0332944	-0.360463	-0.371448	-0.684402	-0.350263	-2.2241	-1.59923	-0.496259	-0.639861	-0.958403	-0.445072	-0.596963	-1.32275	-0.329143	-0.376823	1.1644	-0.554283	-0.809685	-0.686394	-1.16959	-1.17535	-0.672925	-0.51042	-0.988179	-0.99186	0.73961	-0.107584	-0.067846	0.536619	5
1,4-dimethyl-7-(prop-2-en-1-yl)-2,3,5,6-tetraoxabicyclo[2.2.1]heptane	[H]C([H])=C([H])C([H])([H])C1([H])C2(OOC1(OO2)C([H])([H])[H])C([H])([H])[H]	AID:704018	Active	-0.888948	-1.35892	-1.18698	-0.734173	-1.16498	-1.16429	-0.474587	-0.693538	-0.584819	-0.69215	-0.418741	-0.360463	-0.68551	-1.1673	-0.877263	-0.863881	-1.59923	0.847435	0.566391	-0.958403	1.57452	1.21196	-1.32275	-0.329143	-0.376823	1.4563	-1.12189	-1.17543	-0.969069	-0.903579	-0.853397	-1.04113	-0.795421	-0.720677	-0.669002	1.60318	-1.00326	-1.13397	-0.897525	5
(3R,6S)-1,3,6-trimethyl-7-(prop-2-en-1-yl)-2,4,5,10-tetraoxatricyclo[4.3.1.0?,?]decane	[H]C([H])=C([H])C([H])([H])C12C([H])([H])C([H])([H])C3(OC1(OOC2(O3)C([H])([H])[H])C([H])([H])[H])C([H])([H])[H]	AID:704018	Active	-0.327596	-0.931735	-0.782866	-0.734173	-0.793686	-0.792964	-0.474587	-0.693538	-0.584819	-0.69215	-0.418741	-0.360463	-0.68551	-0.780982	-0.438096	0.496336	-1.59923	2.19113	1.77264	-0.958403	3.59412	3.02087	-1.32275	-0.329143	-0.376823	1.7482	-0.671726	-0.707744	-0.389175	-0.203746	-0.0593515	-0.570299	-0.210756	-0.0169305	0.127272	1.60318	-0.698768	-1.02869	-0.867606	5
2-iodo-N-[6-methanesulfonyl-3-(prop-2-en-1-yl)-2,3-dihydro-1,3-benzothiazol-2-ylidene]benzamide	[H]C([H])=C([H])C([H])([H])N1C(Sc2c([H])c(c([H])c([H])c12)S(=O)(=O)C([H])([H])[H])=NC(=O)c1c([H])c([H])c([H])c([H])c1I	AID: 685510	Active	0.334313	0.514506	0.418189	-0.0697494	1.07403	1.07465	-0.143403	-0.693538	0.115258	-0.69215	-0.0332944	0.769739	0.570737	0.184818	-0.13068	-0.183772	0.572358	-0.496259	-0.639861	0.015093	-0.445072	-0.596963	0.837185	-0.329143	-0.376823	-0.781611	0.534015	0.735937	0.839533	0.623322	0.518395	-0.0983267	-0.178622	-0.270661	-0.32861	0.37979	0.299269	0.212511	0.129971	3
(4R)-1-methyl-4-(prop-1-en-2-yl)-7-oxabicyclo[4.1.0]heptane	[H]C([H])=C(C([H])([H])[H])C1([H])C([H])([H])C([H])([H])C2(OC2([H])C1([H])[H])C([H])([H])[H]	PMID: 23408270	Active	-0.315847	-1.20489	-1.22767	-1.24732	-1.30188	-1.30137	-1.46814	-0.693538	-0.818178	-0.69215	-1.57508	-0.360463	-1.6277	-1.26388	-0.745513	-0.863881	-1.59923	0.847435	0.566391	-0.958403	0.564727	0.307496	-1.32275	0.77575	0.563152	1.63144	-1.09183	-1.04746	-0.741938	-0.642601	-0.669359	-0.912296	-0.566421	-0.458239	-0.484448	1.71112	-1.10406	-1.18434	-0.809524	5
N-(1,3-benzothiazol-2-yl)-N-[3-(dimethylamino)propyl]-3-phenylprop-2-enamide	[H]C(=C([H])c1c([H])c([H])c([H])c([H])c1[H])C(=O)N(c1nc2c([H])c([H])c([H])c([H])c2s1)C([H])([H])C([H])([H])C([H])([H])N(C([H])([H])[H])C([H])([H])[H]	AID: 685509	Active	0.71607	0.474464	0.247182	-0.744272	0.162018	0.162264	-0.474587	-0.693538	0.815335	-0.69215	-0.418741	0.769739	-0.371448	0.184818	0.220653	-0.183772	0.572358	-0.496259	-0.639861	0.015093	-0.445072	-0.596963	0.837185	-0.329143	-0.376823	-0.336808	0.265786	0.252617	0.151947	0.0146358	-0.00885707	0.184905	0.0440009	-0.169207	-0.249148	-0.267886	0.215013	0.547826	0.464703	3
2-[(E)-2-(2,5-dimethyl-1-phenyl-1H-pyrrol-3-yl)ethenyl]-6-(dimethylamino)-1-methylquinolin-1-ium	[H]C(=C([H])c1c([H])c([H])c2c([H])c(c([H])c([H])c2[n+]1C([H])([H])[H])N(C([H])([H])[H])C([H])([H])[H])c1c([H])c(n(c1C([H])([H])[H])-c1c([H])c([H])c([H])c([H])c1[H])C([H])([H])[H]	PMID: 19597541	Active	1.30571	0.809423	0.490386	-1.25742	0.278908	0.279556	-0.805772	-0.693538	-0.118101	-0.69215	-1.18963	-0.360463	-0.999572	0.474558	0.571986	0.496336	1.29622	-0.496259	-0.639861	0.988589	-0.445072	-0.596963	0.837185	-0.329143	-0.376823	-0.497194	0.567347	0.37666	0.272442	0.218587	0.127415	0.521401	0.456306	0.407765	0.314563	-1.01451	0.300723	0.248598	0.0419039	3
piplartine	[H]C(=C([H])c1c([H])c(OC([H])([H])[H])c(OC([H])([H])[H])c(OC([H])([H])[H])c1[H])C(=O)N1C(=O)C([H])=C([H])C([H])([H])C1([H])[H]	PMID: 20832410	Active	-0.594662	-0.169872	-0.139338	-0.141914	-0.168569	-0.167719	0.187781	-0.693538	0.348617	-0.69215	-0.0332944	1.89994	-0.0573867	-0.104922	-0.0867633	-0.863881	-0.875371	-0.496259	-0.0367353	-0.958403	-0.445072	0.307496	-0.242784	-0.329143	-0.376823	-0.140572	-0.143625	-0.363826	-0.577762	-0.553187	-0.597229	-0.224067	-0.400895	-0.368325	-0.412115	-0.501769	0.0115017	0.221329	0.095161	5
amitriptyline	[H]C(=C1c2c([H])c([H])c([H])c([H])c2C([H])([H])C([H])([H])c2c([H])c([H])c([H])c([H])c12)C([H])([H])C([H])([H])N(C([H])([H])[H])C([H])([H])[H]	PMID: 19597541	Active	0.642906	-0.0427879	-0.254877	-1.44278	-0.442657	-0.442145	-1.46814	-0.693538	-0.35146	-0.69215	-1.57508	-0.360463	-1.6277	-0.298082	0.00106995	-0.183772	-0.151506	-0.496259	-0.0367353	-0.958403	-0.445072	-0.596963	0.837185	-0.329143	0.563152	-0.119967	-0.206302	-0.19264	-0.231067	-0.278723	-0.237695	-0.051729	-0.0513466	-0.0923266	-0.0515716	0.307826	-0.291665	-0.0946241	-0.123964	4
cyclobenzaprine	[H]C(=C1c2c([H])c([H])c([H])c([H])c2C([H])=C([H])c2c([H])c([H])c([H])c([H])c12)C([H])([H])C([H])([H])N(C([H])([H])[H])C([H])([H])[H]	PMID: 19597541	Active	0.866935	-0.00362945	-0.26624	-1.44278	-0.456495	-0.455993	-1.46814	-0.693538	-0.35146	-0.69215	-1.57508	-0.360463	-1.6277	-0.298082	-0.0867633	-0.183772	-0.151506	-0.496259	-0.0367353	-0.958403	-0.445072	-0.596963	0.837185	-0.329143	0.563152	-0.470249	-0.247483	-0.268953	-0.318667	-0.395447	-0.372953	-0.128556	-0.139667	-0.209703	-0.18721	0.073943	-0.321641	-0.138378	-0.159445	4
doxepin	[H]C(=C1c2c([H])c([H])c([H])c([H])c2OC([H])([H])c2c([H])c([H])c([H])c([H])c12)C([H])([H])C([H])([H])N(C([H])([H])[H])C([H])([H])[H]	PMID: 20060828	Active	0.522982	-0.122032	-0.275498	-1.24859	-0.429121	-0.428546	-1.13696	-0.693538	-0.35146	-0.69215	-1.18963	-0.360463	-1.31363	-0.298082	-0.0867633	-0.183772	-0.151506	-0.496259	-0.0367353	-0.958403	-0.445072	0.307496	0.837185	-0.329143	-0.376823	-0.249018	-0.253726	-0.285515	-0.337491	-0.422128	-0.405143	-0.145229	-0.158646	-0.236534	-0.21949	0.127916	-0.314726	-0.128312	-0.151303	4
thiothixene	[H]C(=C1c2c([H])c([H])c([H])c([H])c2Sc2c([H])c([H])c(c([H])c12)S(=O)(=O)N(C([H])([H])[H])C([H])([H])[H])C([H])([H])C([H])([H])N1C([H])([H])C([H])([H])N(C([H])([H])[H])C([H])([H])C1([H])[H]	PMID: 19597541	Active	0.237013	0.80661	0.675995	-0.58816	0.698359	0.698249	-0.143403	-0.693538	0.115258	-0.69215	-0.0332944	-0.360463	0.256675	0.571138	0.65982	0.496336	-0.151506	0.175588	0.566391	-0.958403	0.564727	1.21196	0.837185	-0.329143	-0.376823	0.199856	0.824713	1.04324	1.28579	1.31519	0.964999	0.607618	0.545498	0.470412	0.291463	0.505727	0.611754	0.575814	0.320006	3
chlorprothixene	[H]C(=C1c2c([H])c([H])c([H])c([H])c2Sc2c([H])c([H])c(Cl)c([H])c12)C([H])([H])C([H])([H])N(C([H])([H])[H])C([H])([H])[H]	PMID: 19597541	Active	1.23578	0.00165178	-0.128056	-1.44278	-0.178673	-0.181745	-1.46814	-0.693538	-0.35146	-0.69215	-1.18963	-0.360463	-0.999572	-0.298082	-0.218513	-0.183772	-0.151506	-0.496259	-0.0367353	-0.958403	-0.445072	0.307496	0.837185	-0.329143	-0.376823	-0.392409	-0.068711	-0.0651349	0.0389474	-0.0214157	0.0550436	-0.232945	-0.21723	-0.320436	-0.297082	0.883538	-0.217745	-0.097103	-0.0908565	4
N-[7-(3',4'-methylenedioxyphenyl)-2(Z),4(Z)-heptadienoyl] pyrrolidine	[H]C(C([H])=C([H])C([H])([H])C([H])([H])c1c([H])c([H])c2OC([H])([H])Oc2c1[H])=C([H])C(=O)N1C([H])([H])C([H])([H])C([H])([H])C1([H])[H]	PMID: 23561585	Active	0.0113558	-0.186077	-0.203865	-0.69525	-0.291926	-0.291209	-0.474587	-0.693538	0.348617	-0.69215	-0.804187	0.769739	-0.68551	-0.201502	-0.0428467	-0.183772	-0.875371	0.175588	0.566391	-0.958403	0.564727	1.21196	-0.242784	-0.329143	-0.376823	0.191395	-0.255278	-0.175929	-0.367728	-0.370577	-0.409194	-0.0349057	-0.189132	-0.184694	-0.223552	-0.0250075	-0.218902	0.136242	0.0890546	5
7,8,15-trioxadispiro[5.2.5?.2?]hexadecane	[H]C1([H])C([H])([H])C([H])([H])C2(OOC3(C([H])([H])O2)C([H])([H])C([H])([H])C([H])([H])C([H])([H])C3([H])[H])C([H])([H])C1([H])[H]	PMID: 17283188	Active	0.154078	-0.835952	-0.750882	-0.928366	-0.793384	-0.792714	-0.805772	-0.693538	-1.05154	-0.69215	-0.804187	-0.360463	-0.999572	-0.780982	-0.26243	-0.183772	-1.59923	1.51928	1.16952	-0.958403	0.564727	0.307496	-1.32275	1.88064	1.50313	2.33201	-0.677415	-0.433071	-0.332166	-0.228036	-0.189068	-0.293777	-0.153278	-0.0413559	-0.00280841	1.87304	-0.664783	-0.615388	-0.499601	5
phenylmercurio acetate	[H]c1c([H])c([H])c([Hg]OC(=O)C([H])([H])[H])c([H])c1[H]	PMID: 19597541	Active	-1.27408	-1.40045	-1.05919	-0.957611	-0.0354106	-0.0241507	-1.13696	-0.693538	-0.35146	-0.69215	-1.18963	-0.360463	-0.999572	-1.26388	-1.09685	-1.54399	-0.875371	-0.496259	-0.639861	-0.958403	-0.445072	-0.596963	-0.242784	-0.329143	-0.376823	-0.73296	-0.375096	-0.0162688	0.243539	0.542068	0.146702	-1.16833	-1.13444	-1.11686	-1.05575	1.64372	-0.939537	-0.560039	0.0245042	5
benzalkonium	[H]c1c([H])c([H])c(c([H])c1[H])C([H])([H])[N+](C([H])([H])[H])(C([H])([H])[H])C([H])([H])C([H])([H])C([H])([H])C([H])([H])C([H])([H])C([H])([H])C([H])([H])C([H])([H])C([H])([H])C([H])([H])C([H])([H])C([H])([H])C([H])([H])[H]	PMID: 19597541	Active	2.04187	0.29316	0.0378975	-1.51095	-0.16014	-0.159545	-1.46814	-0.693538	2.21549	-0.69215	-1.96053	-0.360463	-1.6277	-0.104922	0.835486	-1.54399	-0.875371	-0.496259	-0.639861	-0.958403	-0.445072	-0.596963	-0.242784	-0.329143	-0.376823	1.37669	0.278408	0.381168	0.287609	-0.063373	-0.127825	0.52594	0.471598	0.124228	0.0586062	1.24336	0.447599	1.55136	2.7608	5
2-benzyl-2-(tert-butylperoxy)propanedinitrile	[H]c1c([H])c([H])c(c([H])c1[H])C([H])([H])C(OOC(C([H])([H])[H])(C([H])([H])[H])C([H])([H])[H])(C#N)C#N	AID:704018	Active	-0.1753	-0.674372	-0.587398	-0.121506	-0.669979	-0.669292	-0.474587	-0.693538	0.115258	-0.69215	-0.418741	-0.360463	-0.68551	-0.587822	-0.438096	-1.54399	-0.875371	-0.496259	-0.639861	-0.958403	-0.445072	-0.596963	-0.242784	-0.329143	-0.376823	0.330395	-0.550173	-0.740865	-0.526061	-1.01616	-1.02932	-0.603642	-0.348768	-0.833886	-0.845421	0.289835	-0.280943	-0.260672	0.256745	5
ethyl 2-benzyl-2-(tert-butylperoxy)-3-oxobutanoate	[H]c1c([H])c([H])c(c([H])c1[H])C([H])([H])C(OOC(C([H])([H])[H])(C([H])([H])[H])C([H])([H])[H])(C(=O)OC([H])([H])C([H])([H])[H])C(=O)C([H])([H])[H]	AID:704018	Active	-0.114268	-0.259911	-0.196112	-0.210082	-0.230121	-0.229305	-0.143403	-0.693538	1.04869	-0.69215	-0.0332944	-0.360463	-0.371448	-0.201502	0.0889032	-1.54399	-0.875371	-0.496259	-0.639861	-0.958403	-0.445072	-0.596963	-0.242784	-0.329143	-0.376823	0.683621	-0.0681812	-0.313261	-0.225053	-0.732472	-0.798915	-0.173161	-0.0452825	-0.548613	-0.614367	0.433763	0.219047	0.228617	0.518113	5
1,3-diethyl 2-benzyl-2-(tert-butylperoxy)propanedioate	[H]c1c([H])c([H])c(c([H])c1[H])C([H])([H])C(OOC(C([H])([H])[H])(C([H])([H])[H])C([H])([H])[H])(C(=O)OC([H])([H])C([H])([H])[H])C(=O)OC([H])([H])C([H])([H])[H]	AID:704018	Active	-0.129331	-0.106575	-0.00697243	-0.0158886	-0.024016	-0.0231211	0.187781	-0.693538	1.51541	-0.69215	0.352152	-0.360463	-0.0573867	-0.00834246	0.26457	-1.54399	-0.875371	-0.496259	-0.639861	-0.958403	-0.445072	-0.596963	-0.242784	-0.329143	-0.376823	0.775198	0.108808	-0.133072	-0.178093	-0.719745	-0.751794	0.00823983	0.00206357	-0.535814	-0.567114	0.253853	0.435568	0.563708	0.757433	5
7-benzyl-1,4-dimethyl-2,3,5,6-tetraoxabicyclo[2.2.1]heptane	[H]c1c([H])c([H])c(c([H])c1[H])C([H])([H])C1([H])C2(OOC1(OO2)C([H])([H])[H])C([H])([H])[H]	AID:704018	Active	-0.501259	-0.963938	-0.807711	-0.734173	-0.821362	-0.82066	-0.474587	-0.693538	-0.584819	-0.69215	-0.418741	-0.360463	-0.68551	-0.780982	-0.613763	-0.183772	-0.875371	0.847435	0.566391	-0.958403	1.57452	1.21196	-0.242784	-0.329143	-0.376823	0.580597	-0.788291	-0.802717	-0.635961	-0.596288	-0.586106	-0.665911	-0.459573	-0.411667	-0.400961	1.13541	-0.757503	-0.87763	-0.716567	5
(3R,6S)-7-benzyl-1,3,6-trimethyl-2,4,5,10-tetraoxatricyclo[4.3.1.0?,?]decane	[H]c1c([H])c([H])c(c([H])c1[H])C([H])([H])C12C([H])([H])C([H])([H])C3(OC1(OOC2(O3)C([H])([H])[H])C([H])([H])[H])C([H])([H])[H]	AID:704018	Active	0.0600931	-0.536751	-0.4036	-0.734173	-0.450064	-0.449337	-0.474587	-0.693538	-0.584819	-0.69215	-0.418741	-0.360463	-0.68551	-0.394662	-0.174597	1.17644	-0.875371	2.19113	1.77264	-0.958403	3.59412	3.02087	-0.242784	-0.329143	-0.376823	1.01845	-0.338126	-0.335028	-0.0548585	0.0950426	0.211701	-0.195075	0.126312	0.283529	0.399085	1.13541	-0.450621	-0.785379	-0.710611	5
nicardipine	[H]c1c([H])c([H])c(c([H])c1[H])C([H])([H])N(C([H])([H])[H])C([H])([H])C([H])([H])OC(=O)C1=C(N=C(C([H])([H])[H])C([H])(C(=O)OC([H])([H])[H])C1([H])c1c([H])c([H])c([H])c(c1[H])N(=O)=O)C([H])([H])[H]	PMID: 16566851	Active	0.48163	0.996595	1.00218	0.831578	0.94475	0.945827	1.18133	-0.693538	1.51541	-0.69215	1.12304	-0.360463	0.884798	1.05404	0.879403	-0.183772	-0.151506	-0.496259	-0.0367353	-0.958403	-0.445072	0.307496	0.837185	-0.329143	-0.376823	0.0417015	0.950746	0.691255	0.46014	0.329173	0.261608	0.838113	0.645549	0.518969	0.449133	-1.48228	1.11574	1.27469	0.955881	3
1,4-dimethyl-7-(1-phenylethyl)-2,3,5,6-tetraoxabicyclo[2.2.1]heptane	[H]c1c([H])c([H])c(c([H])c1[H])C([H])(C([H])([H])[H])C1([H])C2(OOC1(OO2)C([H])([H])[H])C([H])([H])[H]	AID:704018	Active	-0.174986	-0.842573	-0.702831	-0.734173	-0.725078	-0.724367	-0.474587	-0.693538	-0.584819	-0.69215	-0.418741	-0.360463	-0.68551	-0.684402	-0.482013	-0.183772	-0.875371	0.847435	0.566391	-0.958403	1.57452	1.21196	-0.242784	-0.329143	-0.376823	0.715321	-0.650197	-0.69007	-0.511699	-0.454343	-0.324807	-0.552505	-0.334287	-0.268929	-0.138928	1.13541	-0.644359	-0.812313	-0.667604	5
benztropine mesylate	[H]c1c([H])c([H])c(c([H])c1[H])C([H])(OC1([H])C([H])([H])C2([H])N(C([H])([H])[H])C([H])(C([H])([H])C2([H])[H])C1([H])[H])c1c([H])c([H])c([H])c([H])c1[H]	PMID: 19597541	Active	0.787838	0.0310206	-0.070948	-1.24859	-0.236552	-0.235961	-1.13696	-0.693538	-0.118101	-0.69215	-1.18963	-0.360463	-1.31363	-0.104922	0.176737	0.496336	-0.151506	0.847435	0.566391	-0.958403	1.57452	1.21196	0.837185	-0.329143	-0.376823	0.330395	-0.0801481	0.0683691	0.0425785	0.20463	0.260705	0.211036	0.224551	0.393729	0.448227	0.505727	-0.191837	-0.0456335	-0.132594	5
clomiphene	[H]c1c([H])c([H])c(c([H])c1[H])C(Cl)=C(c1c([H])c([H])c([H])c([H])c1[H])c1c([H])c([H])c(OC([H])([H])C([H])([H])N(C([H])([H])C([H])([H])[H])C([H])([H])C([H])([H])[H])c([H])c1[H]	PMID: 19597541	Active	2.03524	0.828899	0.593395	-1.24859	0.439792	0.437284	-1.13696	-0.693538	1.04869	-0.69215	-1.18963	-0.360463	-0.999572	0.474558	0.571986	-0.183772	0.572358	-0.496259	-0.639861	-0.958403	-0.445072	-0.596963	1.91715	-0.329143	-0.376823	-0.36247	0.575836	0.527179	0.104707	0.149438	-0.00504776	0.574973	0.178263	0.195287	0.0342912	-0.312863	0.561022	1.09827	0.794954	3
levamisole	[H]c1c([H])c([H])c(c([H])c1[H])C1([H])N=C2SC([H])([H])C([H])([H])N2C1([H])[H]	PMID: 9460257	Active	-0.533363	-0.812895	-0.904921	-1.18273	-0.94452	-0.944444	-1.13696	-0.693538	-0.818178	-0.69215	-0.804187	-0.360463	-0.999572	-0.974142	-0.78943	-0.183772	-0.875371	0.175588	0.566391	-0.958403	0.564727	1.21196	-0.242784	-0.329143	-0.376823	0.10294	-0.883439	-0.667762	-0.611052	-0.44914	-0.279878	-0.785494	-0.740543	-0.617716	-0.54124	1.11742	-0.983237	-0.867223	-0.738651	5
diazepam	[H]c1c([H])c([H])c(c([H])c1[H])C1=NC([H])([H])C(=O)N(c2c([H])c([H])c(Cl)c([H])c12)C([H])([H])[H]	PMID: 17316476	Active	0.0527069	-0.267743	-0.344023	-0.82359	-0.392308	-0.394817	-0.805772	-0.693538	-0.818178	-0.69215	-1.18963	0.769739	-0.68551	-0.394662	-0.482013	-0.183772	-0.151506	-0.496259	-0.0367353	-0.958403	-0.445072	0.307496	0.837185	-0.329143	-0.376823	-0.73296	-0.398201	-0.465993	-0.500482	-0.48803	-0.505064	-0.424881	-0.448757	-0.385331	-0.39341	0.0649475	-0.43776	-0.402053	-0.429422	4
(3R,6R)-1,3-dimethyl-6-phenyl-2,4,5,10-tetraoxatricyclo[4.3.1.0?,?]decane	[H]c1c([H])c([H])c(c([H])c1[H])C12OOC3(OC(O1)(C([H])([H])[H])C([H])([H])C([H])([H])C23[H])C([H])([H])[H]	AID:704018	Active	-0.216803	-0.778245	-0.61336	-0.734173	-0.642632	-0.641923	-0.474587	-0.693538	-0.818178	-0.69215	-0.418741	-0.360463	-0.68551	-0.587822	-0.438096	1.17644	-0.875371	2.19113	1.77264	-0.958403	3.59412	3.02087	-0.242784	-0.329143	-0.376823	0.830798	-0.596742	-0.547438	-0.339317	-0.254809	-0.071784	-0.408914	-0.160487	-0.0682782	0.114805	1.13541	-0.672433	-0.912908	-0.784485	5
3-cyano-4-(4-phenylphenyl)-1,2,5-oxadiazol-2-ium-2-olate	[H]c1c([H])c([H])c(c([H])c1[H])-c1c([H])c([H])c(c([H])c1[H])-c1non(=O)c1C#N	AID: 438764	Active	-0.319581	-0.544943	-0.47032	0.104036	-0.53982	-0.53911	-0.143403	-0.693538	-0.584819	-0.69215	-0.418741	-0.360463	-0.371448	-0.394662	-0.65768	-0.183772	0.572358	-0.496259	-0.639861	0.015093	-0.445072	-0.596963	0.837185	-0.329143	-0.376823	-1.17081	-0.621659	-0.660883	-0.75748	-0.70426	-0.716422	-0.523122	-0.582091	-0.520242	-0.531643	-0.834602	-0.552165	-0.463998	-0.503548	4
N-phenyl-N-[1-(piperidine-1-carbonyl)cyclohexyl] benzamide	[H]c1c([H])c([H])c(c([H])c1[H])N(C(=O)c1c([H])c([H])c([H])c([H])c1[H])C1(C(=O)N2C([H])([H])C([H])([H])C([H])([H])C([H])([H])C2([H])[H])C([H])([H])C([H])([H])C([H])([H])C([H])([H])C1([H])[H]	PMID: 19645335	Active	1.15482	0.611531	0.496367	-0.656327	0.333795	0.334536	-0.474587	-0.693538	0.348617	-0.69215	-1.18963	1.89994	-0.68551	0.474558	0.65982	0.496336	-0.151506	0.847435	0.566391	-0.958403	0.564727	0.307496	0.837185	0.77575	0.563152	0.370428	0.441717	0.629702	0.415855	0.483958	0.532525	0.776146	0.600899	0.67462	0.72081	-0.375832	0.382591	0.566575	0.172047	3
ethyl 2-[2-(2-bromobenzamido)-6-methanesulfonyl-2,3-dihydro-1,3-benzothiazol-3-yl]acetate	[H]c1c([H])c([H])c(C(=O)N=C2Sc3c([H])c(c([H])c([H])c3N2C([H])([H])C(=O)OC([H])([H])C([H])([H])[H])S(=O)(=O)C([H])([H])[H])c(Br)c1[H]	AID: 685510	Active	0.0638735	0.551062	0.598379	0.483586	1.06734	1.06105	0.518965	-0.693538	0.581976	-0.69215	0.737598	0.769739	1.19886	0.474558	0.0889032	-0.183772	0.572358	-0.496259	-0.639861	0.015093	-0.445072	-0.596963	0.837185	-0.329143	-0.376823	-0.433377	0.719302	0.904651	0.892137	0.634383	0.522357	0.145583	-0.0368627	-0.172067	-0.250227	-0.0879759	0.590433	0.51163	0.481975	3
nifedipine	[H]c1c([H])c([H])c(c(c1[H])N(=O)=O)C1([H])C(C(=O)OC([H])([H])[H])=C(N=C(C([H])([H])[H])C1([H])C(=O)OC([H])([H])[H])C([H])([H])[H]	PMID: 23903976	Active	-0.392036	-0.0781747	0.0149683	0.76341	0.0304789	0.0314541	0.85015	-0.693538	0.348617	-0.69215	0.737598	-0.360463	0.570737	0.0882375	-0.0428467	-0.863881	-0.875371	-0.496259	-0.0367353	-0.958403	-0.445072	0.307496	-0.242784	-0.329143	-0.376823	0.0654763	0.00573588	-0.266023	-0.369921	-0.294889	-0.240368	-0.125605	-0.191343	-0.108583	-0.054252	-0.744647	0.216803	0.158766	-0.0561341	5
flunitrazepam	[H]c1c([H])c([H])c(c(F)c1[H])C1=NC([H])([H])C(=O)N(c2c([H])c([H])c(c([H])c12)N(=O)=O)C([H])([H])[H]	PMID: 17316476	Active	-0.299796	-0.226461	-0.203711	0.0840485	-0.19639	-0.195476	0.187781	-0.693538	-0.584819	-0.69215	-0.418741	0.769739	0.256675	-0.104922	-0.39418	-0.183772	-0.151506	-0.496259	-0.0367353	-0.958403	-0.445072	0.307496	0.837185	-0.329143	-0.376823	-0.73296	-0.329899	-0.433179	-0.507778	-0.460449	-0.505951	-0.293886	-0.330334	-0.275069	-0.320581	-0.79862	-0.202708	-0.270865	-0.304771	4
N-[3-(dimethylamino)propyl]-N-{4,6-dioxa-10-thia-12-azatricyclo[7.3.0.0?,?]dodeca-1,3(7),8,11-tetraen-11-yl}-3-phenoxypropanamide	[H]c1c([H])c([H])c(OC([H])([H])C([H])([H])C(=O)N(c2nc3c([H])c4OC([H])([H])Oc4c([H])c3s2)C([H])([H])C([H])([H])C([H])([H])N(C([H])([H])[H])C([H])([H])[H])c([H])c1[H]	AID: 685510	Active	0.416201	0.659977	0.599631	-0.161691	0.587763	0.58823	0.518965	-0.693538	1.28205	-0.69215	0.737598	0.769739	0.570737	0.571138	0.484153	0.496336	0.572358	-0.496259	-0.0367353	0.015093	-0.445072	0.307496	0.837185	-0.329143	-0.376823	0.10294	0.588972	0.57407	0.417344	0.264448	0.23936	0.508521	0.311582	0.0884017	-0.00969417	-0.573733	0.472724	0.698749	0.482752	3
N-(4-chloro-1,3-benzothiazol-2-yl)-N-[2-(dimethylamino)ethyl]-3-(phenylsulfanyl)propanamide	[H]c1c([H])c([H])c(SC([H])([H])C([H])([H])C(=O)N(c2nc3c(Cl)c([H])c([H])c([H])c3s2)C([H])([H])C([H])([H])N(C([H])([H])[H])C([H])([H])[H])c([H])c1[H]	AID: 685510	Active	1.14197	0.64707	0.490246	-0.744272	0.536124	0.532805	-0.474587	-0.693538	1.04869	-0.69215	-0.0332944	0.769739	0.256675	0.281398	0.220653	-0.183772	0.572358	-0.496259	-0.639861	0.015093	-0.445072	-0.596963	0.837185	-0.329143	-0.376823	-0.119967	0.556764	0.614299	0.598958	0.471075	0.454538	0.195614	0.0406286	-0.167597	-0.287151	0.541709	0.437636	0.760076	0.699506	3
1,4-dimethyl-7-[1-(naphthalen-2-yl)ethyl]-2,3,5,6-tetraoxabicyclo[2.2.1]heptane	[H]c1c([H])c([H])c2c([H])c(c([H])c([H])c2c1[H])C([H])(C([H])([H])[H])C1([H])C2(OOC1(OO2)C([H])([H])[H])C([H])([H])[H]	AID:704018	Active	0.495705	-0.391581	-0.329088	-0.734173	-0.381456	-0.380741	-0.474587	-0.693538	-0.584819	-0.69215	-0.418741	-0.360463	-0.68551	-0.298082	-0.218513	0.496336	-0.151506	0.847435	0.566391	-0.958403	1.57452	1.21196	0.837185	-0.329143	-0.376823	0.271525	-0.30828	-0.328434	-0.169856	-0.114354	-0.0111034	-0.188436	0.0103681	0.0729615	0.175656	0.667646	-0.396907	-0.617498	-0.558327	5
10-(10-oxo-9,10-dihydroanthracen-9-ylidene)-9,10-dihydroanthracen-9-one	[H]c1c([H])c([H])c2C(=C3c4c([H])c([H])c([H])c([H])c4C(=O)c4c([H])c([H])c([H])c([H])c34)c3c([H])c([H])c([H])c([H])c3C(=O)c2c1[H]	PMID: 23734964	Active	1.58171	0.655597	0.506591	-0.792662	0.291971	0.292518	-1.13696	-0.693538	-1.05154	-0.69215	-1.18963	-0.360463	-1.31363	0.571138	0.0889032	1.85655	1.29622	-0.496259	0.566391	-0.958403	-0.445072	-0.596963	2.99712	-0.329143	1.50313	-1.17081	0.282812	0.373296	0.216719	0.353323	0.450836	0.518015	0.400125	0.543254	0.638892	-1.65319	0.0434744	-0.10672	-0.435848	3
9H-thioxanthen-9-one	[H]c1c([H])c([H])c2C(=O)c3c([H])c([H])c([H])c([H])c3Sc2c1[H]	PMID: 5923279	Active	0.204444	-0.685321	-0.862336	-1.1518	-0.889778	-0.889774	-1.46814	-0.693538	-1.05154	-0.69215	-1.18963	-0.360463	-1.31363	-0.877562	-0.92118	-0.183772	0.572358	-0.496259	-0.639861	0.015093	-0.445072	-0.596963	0.837185	-0.329143	-0.376823	-1.17081	-0.875949	-0.755372	-0.664625	-0.477148	-0.358156	-0.829865	-0.800813	-0.696189	-0.631351	0.47874	-0.9511	-0.903919	-0.75983	4
12-bromo-10-butoxy-15-oxa-14-azatetracyclo[7.6.1.0?,?.0??,??]hexadeca-1(16),2,4,6,9,11,13-heptaen-8-one	[H]c1c([H])c([H])c2C(=O)c3c(OC([H])([H])C([H])([H])C([H])([H])C([H])([H])[H])c([H])c(Br)c4noc(-c2c1[H])c34	AID: 1011	Active	1.11516	-0.0314912	-0.0303748	-0.409956	0.208118	0.202521	-0.474587	-0.693538	-0.118101	-0.69215	-0.418741	-0.360463	-0.371448	-0.104922	-0.306347	0.496336	0.572358	-0.496259	-0.0367353	0.015093	-0.445072	-0.596963	0.837185	-0.329143	0.563152	-0.392409	-0.0202927	-0.0300288	-0.124205	-0.113844	-0.108592	-0.0935521	-0.189822	-0.138721	-0.127091	0.055952	-0.24838	-0.298807	-0.465165	4
praziquantel	[H]c1c([H])c([H])c2c(c1[H])C([H])([H])C([H])([H])N1C(=O)C([H])([H])N(C(=O)C3([H])C([H])([H])C([H])([H])C([H])([H])C([H])([H])C3([H])[H])C([H])([H])C21[H]	AID: 562280	Active	-0.30724	-0.114587	-0.0978698	-0.656327	-0.202396	-0.201676	-0.474587	-0.693538	-0.584819	-0.69215	-1.18963	1.89994	-0.68551	-0.104922	0.13282	0.496336	-0.875371	0.847435	1.16952	-0.958403	0.564727	1.21196	-0.242784	0.77575	0.563152	0.857135	-0.116297	0.0981488	0.0780431	0.250037	0.337441	0.241016	0.260307	0.439391	0.525179	0.325817	-0.214472	-0.17011	-0.277955	5
2-(4-oxocyclohexanecarbonyl)-1H,2H,3H,4H,6H,7H,11bH-piperazino[2,1-a]isoquinolin-4-one	[H]c1c([H])c([H])c2c(c1[H])C([H])([H])C([H])([H])N1C(=O)C([H])([H])N(C(=O)C3([H])C([H])([H])C([H])([H])C(=O)C([H])([H])C3([H])[H])C([H])([H])C21[H]	AID: 475951	Active	-0.784726	-0.10454	-0.0292972	-0.297185	-0.106414	-0.105634	-0.143403	-0.693538	-0.584819	-0.69215	-0.804187	1.89994	-0.371448	-0.00834246	0.0889032	0.496336	-0.875371	0.847435	1.16952	-0.958403	0.564727	1.21196	-0.242784	0.77575	0.563152	0.672776	-0.0843794	0.0752955	0.0717588	0.228431	0.267897	0.218009	0.253971	0.417663	0.455439	0.0289655	-0.138555	-0.156573	-0.286699	5
2-(4,4-difluorocyclohexanecarbonyl)-1H,2H,3H,4H,6H,7H,11bH-piperazino[2,1-a]isoquinolin-4-one	[H]c1c([H])c([H])c2c(c1[H])C([H])([H])C([H])([H])N1C(=O)C([H])([H])N(C(=O)C3([H])C([H])([H])C([H])([H])C(F)(F)C([H])([H])C3([H])[H])C([H])([H])C21[H]	AID: 475951	Active	-0.164634	-0.106085	0.0394078	-0.656327	0.044578	0.0455277	-0.474587	-0.693538	-0.584819	-0.69215	-1.18963	1.89994	-0.0573867	0.0882375	0.13282	0.496336	-0.875371	0.847435	1.16952	-0.958403	0.564727	1.21196	-0.242784	0.77575	0.563152	0.857135	-0.029208	0.12005	0.16245	0.289115	0.310767	0.263065	0.345409	0.478687	0.49843	0.19988	-0.00313401	-0.147122	-0.144946	5
2-(piperidine-1-carbonyl)-1H,2H,3H,4H,6H,7H,11bH-piperazino[2,1-a]isoquinolin-4-one	[H]c1c([H])c([H])c2c(c1[H])C([H])([H])C([H])([H])N1C(=O)C([H])([H])N(C(=O)N3C([H])([H])C([H])([H])C([H])([H])C([H])([H])C3([H])[H])C([H])([H])C21[H]	AID: 475951	Active	-0.598617	-0.134218	-0.107841	-0.58816	-0.195614	-0.194839	-0.143403	-0.693538	-0.584819	-0.69215	-1.18963	3.03014	-0.371448	-0.104922	0.0889032	0.496336	-0.875371	0.847435	1.16952	-0.958403	1.57452	2.11641	-0.242784	-0.329143	-0.376823	0.775198	-0.136948	0.0340164	-0.0199698	0.121232	0.190201	0.176452	0.161488	0.309865	0.377525	0.145907	-0.237083	-0.200348	-0.299894	5
imipramine	[H]c1c([H])c([H])c2c(c1[H])N(c1c([H])c([H])c([H])c([H])c1C([H])([H])C2([H])[H])C([H])([H])C([H])([H])C([H])([H])N(C([H])([H])[H])C([H])([H])[H]	PMID: 41672	Active	0.472151	-0.0446685	-0.253485	-1.37461	-0.422037	-0.421459	-1.13696	-0.693538	-0.118101	-0.69215	-1.18963	-0.360463	-1.31363	-0.298082	0.0449866	-0.183772	-0.151506	-0.496259	-0.0367353	-0.958403	-0.445072	0.307496	0.837185	-0.329143	-0.376823	0.1197	-0.194088	-0.175515	-0.219105	-0.274525	-0.21522	-0.034489	-0.0392863	-0.088105	-0.0290337	0.361799	-0.284743	-0.0844773	-0.115704	4
clomipramine	[H]c1c([H])c([H])c2c(c1[H])N(c1c([H])c(Cl)c([H])c([H])c1C([H])([H])C2([H])[H])C([H])([H])C([H])([H])C([H])([H])N(C([H])([H])[H])C([H])([H])[H]	PMID: 17582522	Active	0.852162	0.0843997	-0.08371	-1.37461	-0.185599	-0.188134	-1.13696	-0.693538	-0.118101	-0.69215	-1.18963	-0.360463	-0.999572	-0.201502	0.0449866	-0.183772	-0.151506	-0.496259	-0.0367353	-0.958403	-0.445072	0.307496	0.837185	-0.329143	-0.376823	0.1197	-0.0264313	-0.0525509	-0.0530991	-0.173003	-0.138137	-0.00865767	0.00230683	-0.0685423	-0.0229862	0.622668	-0.135534	0.0211202	-0.0539335	4
mianserin	[H]c1c([H])c([H])c2c(c1[H])N1C([H])([H])C([H])([H])N(C([H])([H])[H])C([H])([H])C1([H])c1c([H])c([H])c([H])c([H])c1C2([H])[H]	PMID: 10831389	Active	0.0120537	-0.230027	-0.374939	-1.37461	-0.53216	-0.5316	-1.13696	-0.693538	-1.05154	-0.69215	-1.18963	-0.360463	-1.31363	-0.394662	-0.174597	0.496336	-0.151506	0.175588	0.566391	-0.958403	0.564727	1.21196	0.837185	-0.329143	-0.376823	-0.00320641	-0.373363	-0.278358	-0.244875	-0.112568	-0.00860423	-0.138023	-0.0652683	0.0747575	0.178162	0.361799	-0.546418	-0.522229	-0.560204	5
2,2-dimethyl-2H,3H,4H,5H,6H-naphtho[1,2-b]pyran-5,6-dione	[H]c1c([H])c([H])c2C3=C(C(=O)C(=O)c2c1[H])C([H])([H])C([H])([H])C(O3)(C([H])([H])[H])C([H])([H])[H]	PMID: 24090700	Active	-0.180918	-0.646768	-0.617738	-0.598469	-0.683845	-0.683218	-0.805772	-0.693538	-1.05154	-0.69215	-0.804187	-0.360463	-0.999572	-0.587822	-0.52593	-0.183772	-0.875371	-0.496259	0.566391	-0.958403	-0.445072	0.307496	-0.242784	-0.329143	0.563152	-0.00320641	-0.606731	-0.622173	-0.417089	-0.515186	-0.495007	-0.484152	-0.238899	-0.330112	-0.309606	0.271844	-0.639817	-0.807163	-0.674161	5
promazine	[H]c1c([H])c([H])c2N(c3c([H])c([H])c([H])c([H])c3Sc2c1[H])C([H])([H])C([H])([H])C([H])([H])N(C([H])([H])[H])C([H])([H])[H]	PMID: 19597541	Active	0.685013	-0.129297	-0.296439	-1.37461	-0.394491	-0.394384	-1.13696	-0.693538	-0.118101	-0.69215	-0.804187	-0.360463	-0.999572	-0.394662	-0.174597	-0.183772	-0.151506	-0.496259	-0.0367353	-0.958403	-0.445072	0.307496	0.837185	-0.329143	-0.376823	-0.140572	-0.224154	-0.170974	-0.115097	-0.123098	0.00120543	-0.241536	-0.246763	-0.332594	-0.281354	0.676641	-0.359639	-0.193396	-0.260409	4
promethazine	[H]c1c([H])c([H])c2N(c3c([H])c([H])c([H])c([H])c3Sc2c1[H])C([H])([H])C([H])(N(C([H])([H])[H])C([H])([H])[H])C([H])([H])[H]	PMID: 14422450	Active	0.684082	-0.129864	-0.296439	-1.37461	-0.394491	-0.394384	-1.13696	-0.693538	-0.35146	-0.69215	-0.804187	-0.360463	-0.999572	-0.394662	-0.174597	-0.183772	-0.151506	-0.496259	-0.0367353	-0.958403	-0.445072	0.307496	0.837185	-0.329143	-0.376823	-0.140572	-0.198267	-0.189621	-0.0822904	-0.00395706	-0.0678785	-0.260309	-0.213686	-0.212787	-0.350632	0.676641	-0.359639	-0.29578	-0.350636	4
triflupromazine	[H]c1c([H])c([H])c2N(c3c([H])c(c([H])c([H])c3Sc2c1[H])C(F)(F)F)C([H])([H])C([H])([H])C([H])([H])N(C([H])([H])[H])C([H])([H])[H]	PMID: 19597541	Active	1.27754	-0.000435	0.0143576	-1.37461	0.0722545	0.072715	-1.13696	-0.693538	0.115258	-0.69215	-0.804187	-0.360463	-0.0573867	-0.00834246	-0.0428467	-0.183772	-0.151506	-0.496259	-0.0367353	-0.958403	-0.445072	0.307496	0.837185	-0.329143	-0.376823	-0.00320641	0.0228451	0.0163517	0.088578	0.0238694	0.0887022	-0.0529498	-0.0414117	-0.184805	-0.185198	0.487736	0.0795707	0.0122054	0.0356142	4
trifluoperazine	[H]c1c([H])c([H])c2N(c3c([H])c(c([H])c([H])c3Sc2c1[H])C(F)(F)F)C([H])([H])C([H])([H])C([H])([H])N1C([H])([H])C([H])([H])N(C([H])([H])[H])C([H])([H])C1([H])[H]	PMID: 731445	Active	1.0948	0.395864	0.407333	-1.30644	0.450335	0.450876	-0.805772	-0.693538	0.115258	-0.69215	-0.418741	-0.360463	0.256675	0.377978	0.352403	0.496336	-0.151506	0.175588	0.566391	-0.958403	0.564727	1.21196	0.837185	-0.329143	-0.376823	0.330395	0.383953	0.484312	0.472078	0.535245	0.506812	0.418159	0.345245	0.329429	0.234085	0.451754	0.373358	0.346906	0.251239	3
chlorpromazine	[H]c1c([H])c([H])c2N(c3c([H])c(Cl)c([H])c([H])c3Sc2c1[H])C([H])([H])C([H])([H])C([H])([H])N(C([H])([H])[H])C([H])([H])[H]	PMID: 19597541	Active	1.06502	-0.000229	-0.126664	-1.37461	-0.158053	-0.161059	-1.13696	-0.693538	-0.118101	-0.69215	-0.804187	-0.360463	-0.68551	-0.298082	-0.174597	-0.183772	-0.151506	-0.496259	-0.0367353	-0.958403	-0.445072	0.307496	0.837185	-0.329143	-0.376823	-0.140572	-0.056497	-0.04801	0.0509093	-0.0215754	0.0729692	-0.215705	-0.20517	-0.313031	-0.272227	0.937511	-0.210806	-0.0872094	-0.0826451	4
citalopram	[H]c1c([H])c(C#N)c([H])c2c1C(OC2([H])[H])(c1c([H])c([H])c(F)c([H])c1[H])C([H])([H])C([H])([H])C([H])([H])N(C([H])([H])[H])C([H])([H])[H]	PMID: 17582522	Active	0.43608	-0.0332044	-0.0182355	-0.748059	-0.120122	-0.119369	-0.805772	-0.693538	0.115258	-0.69215	-0.804187	-0.360463	-0.68551	-0.00834246	0.0449866	-0.183772	-0.151506	-0.496259	-0.0367353	-0.958403	-0.445072	0.307496	0.837185	-0.329143	-0.376823	0.0551739	-0.0351252	-0.0991444	-0.0912615	-0.144442	-0.10735	0.0423958	0.0896097	0.0427056	0.0791393	-0.016012	0.0143328	0.0215184	-0.134002	4
7-[1-(4-bromophenyl)ethyl]-1,4-dimethyl-2,3,5,6-tetraoxabicyclo[2.2.1]heptane	[H]c1c([H])c(c([H])c([H])c1Br)C([H])(C([H])([H])[H])C1([H])C2(OOC1(OO2)C([H])([H])[H])C([H])([H])[H]	AID:704018	Active	0.268477	-0.644204	-0.474325	-0.734173	-0.18352	-0.189093	-0.474587	-0.693538	-0.584819	-0.69215	-0.418741	-0.360463	-0.371448	-0.587822	-0.482013	-0.183772	-0.875371	0.847435	0.566391	-0.958403	1.57452	1.21196	-0.242784	-0.329143	-0.376823	0.715321	-0.350822	-0.460256	-0.209692	-0.245208	-0.207738	-0.526674	-0.29369	-0.244204	-0.134755	1.5672	-0.47558	-0.684488	-0.594675	5
(3R,6R)-3-(4-bromophenyl)-1,6-dimethyl-2,4,5,10-tetraoxatricyclo[4.3.1.0?,?]decane	[H]c1c([H])c(c([H])c([H])c1Br)C12OOC3(OC(O1)(C([H])([H])[H])C([H])([H])C([H])([H])C23[H])C([H])([H])[H]	AID:704018	Active	0.226661	-0.579876	-0.384853	-0.734173	-0.101074	-0.106648	-0.474587	-0.693538	-0.818178	-0.69215	-0.418741	-0.360463	-0.371448	-0.491242	-0.438096	1.17644	-0.875371	2.19113	1.77264	-0.958403	3.59412	3.02087	-0.242784	-0.329143	-0.376823	0.830798	-0.297367	-0.317624	-0.0373099	-0.0456738	0.0461362	-0.383082	-0.119889	-0.0435539	0.119832	1.5672	-0.508615	-0.794436	-0.66383	5
1,4-dimethyl-7-[(4-methylphenyl)methyl]-2,3,5,6-tetraoxabicyclo[2.2.1]heptane	[H]c1c([H])c(c([H])c([H])c1C([H])([H])[H])C([H])([H])C1([H])C2(OOC1(OO2)C([H])([H])[H])C([H])([H])[H]	AID:704018	Active	-0.321884	-0.841903	-0.702831	-0.734173	-0.725078	-0.724367	-0.474587	-0.693538	-0.584819	-0.69215	-0.418741	-0.360463	-0.68551	-0.684402	-0.482013	-0.183772	-0.875371	0.847435	0.566391	-0.958403	1.57452	1.21196	-0.242784	-0.329143	-0.376823	0.715321	-0.641881	-0.696988	-0.493039	-0.499321	-0.539091	-0.55947	-0.315474	-0.314157	-0.353814	1.13541	-0.644359	-0.812313	-0.611874	5
(3R,6S)-1,3,6-trimethyl-7-[(4-methylphenyl)methyl]-2,4,5,10-tetraoxatricyclo[4.3.1.0?,?]decane	[H]c1c([H])c(c([H])c([H])c1C([H])([H])[H])C([H])([H])C12C([H])([H])C([H])([H])C3(OC1(OOC2(O3)C([H])([H])[H])C([H])([H])[H])C([H])([H])[H]	AID:704018	Active	0.239468	-0.414716	-0.29872	-0.734173	-0.353779	-0.353044	-0.474587	-0.693538	-0.584819	-0.69215	-0.418741	-0.360463	-0.68551	-0.298082	-0.0428467	1.17644	-0.875371	2.19113	1.77264	-0.958403	3.59412	3.02087	-0.242784	-0.329143	-0.376823	1.09572	-0.191716	-0.229299	0.0880636	0.19201	0.258716	-0.0886344	0.270411	0.381039	0.446232	1.13541	-0.338533	-0.721401	-0.625116	5
1,4-dimethyl-7-[1-(4-methylphenyl)ethyl]-2,3,5,6-tetraoxabicyclo[2.2.1]heptane	[H]c1c([H])c(c([H])c([H])c1C([H])([H])[H])C([H])(C([H])([H])[H])C1([H])C2(OOC1(OO2)C([H])([H])[H])C([H])([H])[H]	AID:704018	Active	0.0043883	-0.720538	-0.597951	-0.734173	-0.628794	-0.628075	-0.474587	-0.693538	-0.584819	-0.69215	-0.418741	-0.360463	-0.68551	-0.587822	-0.350263	-0.183772	-0.875371	0.847435	0.566391	-0.958403	1.57452	1.21196	-0.242784	-0.329143	-0.376823	0.830798	-0.503787	-0.58434	-0.368777	-0.357376	-0.276363	-0.446065	-0.190189	-0.171419	-0.0903482	1.13541	-0.530475	-0.747007	-0.639036	5
(3R,6R)-1,3-dimethyl-6-(4-methylphenyl)-2,4,5,10-tetraoxatricyclo[4.3.1.0?,?]decane	[H]c1c([H])c(c([H])c([H])c1C([H])([H])[H])C12OOC3(OC(O1)(C([H])([H])[H])C([H])([H])C([H])([H])C23[H])C([H])([H])[H]	AID:704018	Active	-0.0374281	-0.65621	-0.50848	-0.734173	-0.546348	-0.54563	-0.474587	-0.693538	-0.818178	-0.69215	-0.418741	-0.360463	-0.68551	-0.491242	-0.306347	1.17644	-0.875371	2.19113	1.77264	-0.958403	3.59412	3.02087	-0.242784	-0.329143	-0.376823	0.930879	-0.450332	-0.441708	-0.196395	-0.157841	-0.0224883	-0.302473	-0.0163885	0.0292315	0.164239	1.13541	-0.561956	-0.849222	-0.701023	5
2-(tert-butylperoxy)-2-[(4-chlorophenyl)methyl]propanedinitrile	[H]c1c([H])c(c([H])c([H])c1Cl)C([H])([H])C(OOC(C([H])([H])[H])(C([H])([H])[H])C([H])([H])[H])(C#N)C#N	AID:704018	Active	0.204712	-0.545304	-0.417623	-0.121506	-0.433541	-0.435967	-0.474587	-0.693538	0.115258	-0.69215	-0.418741	-0.360463	-0.371448	-0.491242	-0.438096	-1.54399	-0.875371	-0.496259	-0.639861	-0.958403	-0.445072	-0.596963	-0.242784	-0.329143	-0.376823	0.330395	-0.382516	-0.6179	-0.361042	-0.903612	-0.972775	-0.577811	-0.30817	-0.809162	-0.842681	0.550704	-0.125977	-0.157396	0.503171	5
ethyl 2-(tert-butylperoxy)-3-(4-chlorophenyl)-2-cyanopropanoate	[H]c1c([H])c(c([H])c([H])c1Cl)C([H])([H])C(OOC(C([H])([H])[H])(C([H])([H])[H])C([H])([H])[H])(C#N)C(=O)OC([H])([H])C([H])([H])[H]	AID:704018	Active	0.227696	-0.261405	-0.12741	-0.0686974	-0.11056	-0.112882	-0.143403	-0.693538	0.815335	-0.69215	-0.0332944	-0.360463	-0.0573867	-0.201502	-0.0867633	-1.54399	-0.875371	-0.496259	-0.639861	-0.958403	-0.445072	-0.596963	-0.242784	-0.329143	-0.376823	0.580597	-0.0530255	-0.314004	-0.187058	-0.755405	-0.837652	-0.27187	-0.132755	-0.660126	-0.707179	0.532713	0.232276	0.248697	0.647915	5
7-[1-(4-chlorophenyl)ethyl]-1,4-dimethyl-2,3,5,6-tetraoxabicyclo[2.2.1]heptane	[H]c1c([H])c(c([H])c([H])c1Cl)C([H])(C([H])([H])[H])C1([H])C2(OOC1(OO2)C([H])([H])[H])C([H])([H])[H]	AID:704018	Active	0.205026	-0.713505	-0.533056	-0.734173	-0.48864	-0.491042	-0.474587	-0.693538	-0.584819	-0.69215	-0.418741	-0.360463	-0.371448	-0.587822	-0.482013	-0.183772	-0.875371	0.847435	0.566391	-0.958403	1.57452	1.21196	-0.242784	-0.329143	-0.376823	0.715321	-0.48254	-0.567105	-0.34668	-0.341796	-0.266831	-0.526674	-0.29369	-0.244204	-0.134755	1.39628	-0.497326	-0.709407	-0.612432	5
(3R,6R)-3-(4-chlorophenyl)-1,6-dimethyl-2,4,5,10-tetraoxatricyclo[4.3.1.0?,?]decane	[H]c1c([H])c(c([H])c([H])c1Cl)C12OOC3(OC(O1)(C([H])([H])[H])C([H])([H])C([H])([H])C23[H])C([H])([H])[H]	AID:704018	Active	0.163209	-0.649177	-0.443585	-0.734173	-0.406194	-0.408598	-0.474587	-0.693538	-0.818178	-0.69215	-0.418741	-0.360463	-0.371448	-0.491242	-0.438096	1.17644	-0.875371	2.19113	1.77264	-0.958403	3.59412	3.02087	-0.242784	-0.329143	-0.376823	0.830798	-0.429085	-0.424473	-0.174298	-0.142261	-0.0129564	-0.383082	-0.119889	-0.0435539	0.119832	1.39628	-0.529752	-0.816282	-0.678714	5
4-(4-chlorophenyl)-3-cyano-1,2,5-oxadiazol-2-ium-2-olate	[H]c1c([H])c(c([H])c([H])c1Cl)-c1non(=O)c1C#N	AID: 438764	Active	-0.909082	-1.07116	-0.878208	0.104036	-0.825735	-0.828149	-0.143403	-0.693538	-0.818178	-0.69215	-0.418741	-0.360463	-0.0573867	-0.877562	-1.09685	-0.863881	-0.151506	-0.496259	-0.639861	0.015093	-0.445072	-0.596963	-0.242784	-0.329143	-0.376823	-1.17081	-0.979152	-1.07119	-1.04334	-1.01698	-1.02285	-1.03415	-0.99608	-0.92316	-0.892902	0.127916	-0.84621	-0.794382	-0.632126	4
1,4-dimethyl-7-[(4-nitrophenyl)methyl]-2,3,5,6-tetraoxabicyclo[2.2.1]heptane	[H]c1c([H])c(c([H])c([H])c1N(=O)=O)C([H])([H])C1([H])C2(OOC1(OO2)C([H])([H])[H])C([H])([H])[H]	AID:704018	Active	-0.554649	-0.792507	-0.566263	0.173466	-0.512494	-0.511596	0.518965	-0.693538	-0.35146	-0.69215	0.352152	-0.360463	0.256675	-0.491242	-0.52593	-0.183772	-0.875371	0.847435	0.566391	-0.958403	1.57452	1.21196	-0.242784	-0.329143	-0.376823	0.580597	-0.600034	-0.674138	-0.510773	-0.49005	-0.526454	-0.536467	-0.333354	-0.304835	-0.341142	0.595682	-0.484739	-0.695008	-0.533387	5
(3R,6S)-1,3,6-trimethyl-7-[(4-nitrophenyl)methyl]-2,4,5,10-tetraoxatricyclo[4.3.1.0?,?]decane	[H]c1c([H])c(c([H])c([H])c1N(=O)=O)C([H])([H])C12C([H])([H])C([H])([H])C3(OC1(OOC2(O3)C([H])([H])[H])C([H])([H])[H])C([H])([H])[H]	AID:704018	Active	0.00670304	-0.365319	-0.162151	0.173466	-0.141195	-0.140273	0.518965	-0.693538	-0.35146	-0.69215	0.352152	-0.360463	0.256675	-0.104922	-0.0867633	1.17644	-0.875371	2.19113	1.77264	-0.958403	3.59412	3.02087	-0.242784	-0.329143	-0.376823	1.01845	-0.149869	-0.206449	0.0703294	0.20128	0.271353	-0.0656309	0.25253	0.390361	0.458904	0.595682	-0.18051	-0.610807	-0.555398	5
2-(tert-butylperoxy)-2-[(4-methoxyphenyl)methyl]propanedinitrile	[H]c1c([H])c(c([H])c([H])c1OC([H])([H])[H])C([H])([H])C(OOC(C([H])([H])[H])(C([H])([H])[H])C([H])([H])[H])(C#N)C#N	AID:704018	Active	-0.170298	-0.505579	-0.398258	0.0726872	-0.463874	-0.463108	-0.143403	-0.693538	0.348617	-0.69215	-0.0332944	-0.360463	-0.371448	-0.394662	-0.26243	-1.54399	-0.875371	-0.496259	-0.639861	-0.958403	-0.445072	-0.596963	-0.242784	-0.329143	-0.376823	0.463836	-0.33898	-0.606206	-0.422449	-0.905769	-0.966307	-0.468077	-0.244303	-0.722879	-0.782229	0.109925	-0.0646887	-0.0667257	0.385048	5
bis(4-methoxybenzoyl)-1,2,5-oxadiazol-2-ium-2-olate	[H]c1c([H])c(c([H])c([H])c1OC([H])([H])[H])C(=O)c1non(=O)c1C(=O)c1c([H])c([H])c(OC([H])([H])[H])c([H])c1[H]	AID: 1011	Active	-0.742096	-0.100134	0.0776055	0.71018	0.0852484	0.0862021	0.85015	-0.693538	0.348617	-0.69215	0.737598	-0.360463	0.570737	0.184818	-0.174597	-0.183772	0.572358	-0.496259	-0.639861	0.015093	-0.445072	-0.596963	0.837185	-0.329143	-0.376823	-0.781611	-0.0490577	-0.256673	-0.454464	-0.437838	-0.561234	-0.116193	-0.276582	-0.252331	-0.376019	-1.32935	0.077239	0.109054	-0.112302	4
(3R,6R)-3-(4-methoxyphenyl)-1,6-dimethyl-2,4,5,10-tetraoxatricyclo[4.3.1.0?,?]decane	[H]c1c([H])c(c([H])c([H])c1OC([H])([H])[H])C12OOC3(OC(O1)(C([H])([H])[H])C([H])([H])C([H])([H])C23[H])C([H])([H])[H]	AID:704018	Active	-0.211801	-0.609451	-0.42422	-0.539979	-0.436527	-0.435739	-0.143403	-0.693538	-0.584819	-0.69215	-0.0332944	-0.360463	-0.371448	-0.394662	-0.26243	1.17644	-0.875371	2.19113	1.77264	-0.958403	3.59412	3.02087	-0.242784	-0.329143	-0.376823	0.930879	-0.38555	-0.412779	-0.235705	-0.144418	-0.00648871	-0.273348	-0.0560224	0.0427293	0.180283	0.955502	-0.472952	-0.757177	-0.689078	5
dyclonine	[H]c1c([H])c(c([H])c([H])c1OC([H])([H])C([H])([H])C([H])([H])C([H])([H])[H])C(=O)C([H])([H])C([H])([H])N1C([H])([H])C([H])([H])C([H])([H])C([H])([H])C1([H])[H]	PMID: 19597541	Active	0.500765	-0.157648	-0.248824	-0.889444	-0.360232	-0.359555	-0.805772	-0.693538	0.815335	-0.69215	-0.804187	-0.360463	-0.999572	-0.298082	0.176737	-0.863881	-0.875371	0.175588	-0.0367353	-0.958403	0.564727	0.307496	-0.242784	-0.329143	-0.376823	0.969799	-0.178947	-0.0617932	-0.294575	-0.333471	-0.427831	0.0799983	-0.115377	-0.147381	-0.242242	0.766596	-0.0583925	0.571956	0.718465	5
3-cyano-4-(3-nitrophenyl)-1,2,5-oxadiazol-2-ium-2-olate	[H]c1c([H])c(c([H])c(c1[H])N(=O)=O)-c1non(=O)c1C#N	AID: 438764	Active	-1.34248	-1.0288	-0.806535	1.01167	-0.753304	-0.752409	0.85015	-0.693538	-0.584819	-0.69215	0.352152	-0.360463	0.570737	-0.684402	-1.00901	-0.863881	-0.151506	-0.496259	-0.639861	0.015093	-0.445072	-0.596963	-0.242784	-0.329143	-0.376823	-1.17081	-0.958552	-1.06557	-1.08218	-1.03067	-1.00875	-0.930532	-0.909464	-0.848477	-0.824789	-0.672683	-0.71714	-0.715259	-0.583676	4
verapamil	[H]c1c([H])c(c([H])c(OC([H])([H])[H])c1OC([H])([H])[H])C([H])([H])C([H])([H])N(C([H])([H])[H])C([H])([H])C([H])([H])C([H])([H])C(C#N)(c1c([H])c([H])c(OC([H])([H])[H])c(OC([H])([H])[H])c1[H])C([H])(C([H])([H])[H])C([H])([H])[H]	PMID: 2883021	Active	1.18058	1.0164	0.91664	-0.165479	0.77368	0.7746	0.187781	-0.693538	1.98213	-0.69215	0.352152	-0.360463	-0.0573867	0.860878	1.18682	-0.863881	-0.151506	-0.496259	-0.639861	-0.958403	-0.445072	-0.596963	0.837185	-0.329143	-0.376823	0.645464	1.08422	0.736725	0.520629	0.496713	0.241461	0.883889	0.706535	0.687446	0.428929	-0.636701	1.18519	1.4934	1.00503	3
2-methyl-5-(propan-2-yl)phenyl acetate	[H]c1c([H])c(c(OC(=O)C([H])([H])[H])c([H])c1C([H])(C([H])([H])[H])C([H])([H])[H])C([H])([H])[H]	PMID: 23086444	Active	-0.0113147	-0.917798	-0.956441	-0.957611	-1.02717	-1.02659	-1.13696	-0.693538	-0.35146	-0.69215	-1.18963	-0.360463	-1.31363	-0.974142	-0.613763	-1.54399	-0.875371	-0.496259	-0.639861	-0.958403	-0.445072	-0.596963	-0.242784	-0.329143	-0.376823	0.288695	-0.816585	-0.9587	-0.874436	-1.00166	-1.03344	-0.822943	-0.70001	-0.819308	-0.849548	0.802578	-0.692438	-0.618313	-0.296567	5
felodipine	[H]c1c([H])c(Cl)c(Cl)c(c1[H])C1([H])C(C(=O)OC([H])([H])C([H])([H])[H])=C(N=C(C([H])([H])[H])C1([H])C(=O)OC([H])([H])[H])C([H])([H])[H]	PMID: 20060828	Active	0.648256	0.127474	0.21795	-0.144229	0.29077	0.285333	-0.143403	-0.693538	0.348617	-0.69215	-0.0332944	-0.360463	0.256675	0.0882375	0.00106995	-0.863881	-0.875371	-0.496259	-0.0367353	-0.958403	-0.445072	0.307496	-0.242784	-0.329143	-0.376823	0.191395	0.264999	0.00412619	-0.129476	-0.0255466	-0.0831124	-0.0495597	-0.175201	-0.130329	-0.0787648	0.316821	0.357098	0.360288	0.0983073	5
1-[3-(2H-1,3-benzodioxol-5-yloxy)propanesulfonyl]-3,5-dimethylpiperidine	[H]c1c([H])c(OC([H])([H])C([H])([H])C([H])([H])S(=O)(=O)N2C([H])([H])C([H])(C([H])([H])[H])C([H])([H])C([H])(C([H])([H])[H])C2([H])[H])c([H])c2OC([H])([H])Oc12	AID: 685510	Active	-0.332248	-0.0314577	0.00584927	-0.141914	0.0930599	0.0934858	0.187781	-0.693538	0.348617	-0.69215	-0.0332944	-0.360463	0.256675	-0.00834246	0.220653	-0.183772	-0.875371	0.175588	0.566391	-0.958403	0.564727	1.21196	-0.242784	-0.329143	-0.376823	1.09572	0.123429	0.394582	0.586605	0.445319	0.599706	0.122382	0.171163	-0.0275192	0.0582613	0.65865	0.101728	0.14345	0.240979	5
neostigmine	[H]c1c([H])c(OC(=O)N(C([H])([H])[H])C([H])([H])[H])c([H])c(c1[H])[N+](C([H])([H])[H])(C([H])([H])[H])C([H])([H])[H]	PMID: 6130710	Active	-0.651077	-0.682281	-0.763162	-0.889444	-0.814114	-0.813409	-0.474587	-0.693538	-0.118101	-0.69215	-1.18963	0.769739	-0.68551	-0.780982	-0.39418	-1.54399	-0.875371	-0.496259	-0.639861	-0.958403	-0.445072	-0.596963	-0.242784	-0.329143	-0.376823	0.288695	-0.595311	-0.875483	-0.588896	-0.9912	-1.06942	-0.739166	-0.41212	-0.808787	-0.885631	0.586686	-0.481412	-0.549888	-0.0703663	5
5-bromo-N-(7-chloro-4-methoxy-1,3-benzothiazol-2-yl)-N-[3-(dimethylamino)propyl]thiophene-2-carboxamide	[H]c1c([H])c(sc1Br)C(=O)N(c1nc2c(OC([H])([H])[H])c([H])c([H])c(Cl)c2s1)C([H])([H])C([H])([H])C([H])([H])N(C([H])([H])[H])C([H])([H])[H]	AID: 685509	Active	1.34791	0.665838	0.597325	-0.550078	1.00877	0.999233	-0.143403	-0.693538	0.815335	-0.69215	0.352152	0.769739	0.884798	0.281398	0.0889032	-0.183772	0.572358	-0.496259	-0.639861	0.988589	-0.445072	-0.596963	-0.242784	-0.329143	-0.376823	-0.00320641	0.771893	0.653898	0.902273	0.720003	0.669908	0.0737782	-0.0175844	-0.193881	-0.261817	0.910524	0.485788	0.583486	0.413723	3
(1S,13S)-16,17-dimethoxy-6-(propan-2-yl)-2,7,20-trioxapentacyclo[11.8.0.0?,??.0?,?.0??,??]henicosa-3,8,10,14(19),15,17-hexaen-12-one	[H]c1c([H])c2C(=O)C3([H])c4c([H])c(OC([H])([H])[H])c(OC([H])([H])[H])c([H])c4OC([H])([H])C3([H])Oc2c2c1OC([H])(C2([H])[H])C([H])(C([H])([H])[H])C([H])([H])[H]	PMID: 19597541	Active	0.41876	0.353601	0.432941	-0.180837	0.374376	0.375253	0.187781	-0.693538	-0.35146	-0.69215	0.352152	-0.360463	-0.0573867	0.474558	0.39632	1.17644	-0.151506	-0.496259	1.16952	-0.958403	-0.445072	2.11641	0.837185	-0.329143	-0.376823	0.352152	0.430135	0.365012	0.355938	0.379053	0.343138	0.509675	0.540489	0.569128	0.530892	-0.61871	0.198448	-0.0161259	-0.274605	3
sanguinarine	[H]c1c([H])c2c(c([H])[n+](c3c2c([H])c([H])c2c([H])c4OC([H])([H])Oc4c([H])c32)C([H])([H])[H])c2OC([H])([H])Oc12	PMID: 19597541	Active	0.212237	0.00461443	-0.0081896	-0.65254	-0.0656474	-0.0648975	-0.143403	-0.693538	-1.05154	-0.69215	-0.418741	-0.360463	-0.371448	0.0882375	-0.218513	1.85655	1.29622	-0.496259	0.566391	0.015093	-0.445072	1.21196	1.91715	-0.329143	-0.376823	-0.64539	-0.116792	-0.090801	-0.126768	0.00902421	0.1069	0.0507953	0.0538106	0.19703	0.29399	-0.906566	-0.408664	-0.571854	-0.625171	4
4-methyl-2-phenyl-4H,7H-pyrazolo[1,5-a]pyrimidine-7-thione	[H]c1c(nn2c1N(C([H])=C([H])C2=S)C([H])([H])[H])-c1c([H])c([H])c([H])c([H])c1[H]	PMID: 7241518	Active	0.00355663	-0.560838	-0.642506	-1.04324	-0.6904	-0.690273	-0.805772	-0.693538	-0.818178	-0.69215	-0.418741	-0.360463	-0.68551	-0.684402	-0.701596	-0.183772	0.572358	-0.496259	-0.639861	0.988589	-0.445072	-0.596963	-0.242784	-0.329143	-0.376823	-0.901365	-0.648492	-0.706795	-0.709937	-0.670934	-0.686688	-0.675153	-0.654703	-0.595206	-0.585443	0.235862	-0.757503	-0.73579	-0.618841	4
2-phenyl-4-propyl-4H,7H-pyrazolo[1,5-a]pyrimidine-7-thione	[H]c1c(nn2c1N(C([H])=C([H])C2=S)C([H])([H])C([H])([H])C([H])([H])[H])-c1c([H])c([H])c([H])c([H])c1[H]	PMID: 7241518	Active	0.511286	-0.320993	-0.432746	-1.04324	-0.497832	-0.497687	-0.805772	-0.693538	-0.35146	-0.69215	-0.418741	-0.360463	-0.68551	-0.491242	-0.438096	-0.183772	0.572358	-0.496259	-0.639861	0.988589	-0.445072	-0.596963	-0.242784	-0.329143	-0.376823	-0.470249	-0.424079	-0.429751	-0.543436	-0.547447	-0.532274	-0.396245	-0.486831	-0.471029	-0.430595	0.235862	-0.530475	-0.434231	-0.434939	4
3-cyano-4-(3,4,5-trimethoxyphenyl)-1,2,5-oxadiazol-2-ium-2-olate	[H]c1c(OC([H])([H])[H])c(OC([H])([H])[H])c(OC([H])([H])[H])c([H])c1-c1non(=O)c1C#N	AID: 438764	Active	-1.27409	-0.693848	-0.480563	0.686616	-0.443858	-0.442922	0.85015	-0.693538	-0.118101	-0.69215	0.737598	-0.360463	0.570737	-0.394662	-0.569846	-0.863881	-0.151506	-0.496259	-0.639861	0.015093	-0.445072	-0.596963	-0.242784	-0.329143	-0.376823	-0.295108	-0.513231	-0.787091	-0.908794	-0.818513	-0.816093	-0.65018	-0.734651	-0.635134	-0.631594	-0.672683	-0.365467	-0.334364	-0.483582	4
(1S,13S)-16,17-dimethoxy-6-(propan-2-yl)-2,7,20-trioxapentacyclo[11.8.0.0?,??.0?,?.0??,??]henicosa-3,5,8,10,14(19),15,17-heptaen-12-one	[H]c1c(oc2c([H])c([H])c3C(=O)C4([H])c5c([H])c(OC([H])([H])[H])c(OC([H])([H])[H])c([H])c5OC([H])([H])C4([H])Oc3c12)C([H])(C([H])([H])[H])C([H])([H])[H]	PMID: 19597541	Active	0.948067	0.376864	0.410505	-0.0985733	0.360537	0.361405	0.187781	-0.693538	-0.35146	-0.69215	0.352152	-0.360463	-0.0573867	0.474558	0.308486	1.17644	0.572358	-0.496259	0.566391	0.015093	-0.445072	1.21196	0.837185	-0.329143	-0.376823	0.0475591	0.39727	0.297899	0.251361	0.237599	0.211376	0.44211	0.435051	0.426883	0.39876	-0.852593	0.169137	-0.0518285	-0.29805	3
3-{[4-(2H-1,3-benzodioxol-5-ylmethyl)piperazin-1-yl]methyl}-1H-indole	[H]c1n([H])c2c([H])c([H])c([H])c([H])c2c1C([H])([H])N1C([H])([H])C([H])([H])N(C([H])([H])c2c([H])c([H])c3OC([H])([H])Oc3c2[H])C([H])([H])C1([H])[H]	PMID: 23762275	Active	0.0879513	0.237393	0.160306	-0.654013	0.0517236	0.0524949	-0.143403	-0.179785	-0.118101	-0.129583	-0.418741	-0.360463	-0.371448	0.184818	0.220653	1.17644	0.572358	0.175588	0.566391	0.015093	0.564727	1.21196	0.837185	-0.329143	-0.376823	-0.00320641	0.0805483	0.184113	0.0763189	0.130898	0.105215	0.327559	0.258569	0.319585	0.2923	-0.267886	-0.094153	0.00714697	-0.138824	3
2,2-dimethyl-1-{4-[6-(pyridin-4-yl)pyridazin-3-yl]piperazin-1-yl}propan-1-one	[H]c1nc([H])c([H])c(c1[H])-c1nnc(c([H])c1[H])N1C([H])([H])C([H])([H])N(C(=O)C(C([H])([H])[H])(C([H])([H])[H])C([H])([H])[H])C([H])([H])C1([H])[H]	AID: 685510	Active	-0.482648	0.0336999	-0.0142473	-0.201877	-0.113141	-0.112317	0.187781	-0.693538	-0.118101	-0.69215	-0.0332944	0.769739	-0.0573867	-0.00834246	0.13282	-0.183772	-0.151506	0.175588	-0.0367353	0.988589	0.564727	0.307496	-1.32275	-0.329143	-0.376823	0.385996	0.0261786	-0.0728823	0.0598839	-0.294256	-0.374401	0.0688346	0.241999	-0.107946	-0.188661	-0.267886	-0.0182471	-0.0233417	0.0300802	5
3-cyclohexyl-1-{4-[6-(pyridin-3-yl)pyridazin-3-yl]piperazin-1-yl}propan-1-one	[H]c1nc([H])c(c([H])c1[H])-c1nnc(c([H])c1[H])N1C([H])([H])C([H])([H])N(C(=O)C([H])([H])C([H])([H])C2([H])C([H])([H])C([H])([H])C([H])([H])C([H])([H])C2([H])[H])C([H])([H])C1([H])[H]	AID: 685510	Active	0.281796	0.455014	0.388699	-0.201877	0.258158	0.259006	0.187781	-0.693538	0.348617	-0.69215	-0.0332944	0.769739	-0.0573867	0.377978	0.571986	0.496336	-0.151506	0.847435	0.566391	0.988589	0.564727	0.307496	-1.32275	0.77575	0.563152	0.739816	0.347847	0.526531	0.313459	0.367713	0.277031	0.672281	0.497661	0.557724	0.464598	-0.267886	0.281147	0.649563	0.426411	3
oltipraz	[H]c1nc([H])c(nc1[H])C1=C(C(=S)SS1)C([H])([H])[H]	PMID: 7134632	Active	0.140359	-0.860709	-0.899979	-0.968552	-0.793144	-0.794002	-1.13696	-0.693538	-0.818178	-0.69215	-0.0332944	-0.360463	-0.371448	-1.07072	-1.09685	-0.863881	-0.151506	-0.496259	-0.639861	0.988589	-0.445072	-0.596963	-1.32275	-0.329143	-0.376823	-0.73296	-0.788845	-0.594787	-0.43363	-0.00457914	0.0482305	-1.11958	-1.06728	-0.99106	-0.974731	1.39628	-0.914506	-0.790019	-0.615409	4
miconazole	[H]c1nc([H])n(c1[H])C([H])([H])C([H])(OC([H])([H])c1c([H])c([H])c(Cl)c([H])c1Cl)c1c([H])c([H])c(Cl)c([H])c1Cl	PMID: 19597541	Active	1.97254	0.269938	0.373476	-0.941832	0.509573	0.497743	-0.805772	-0.693538	0.348617	-0.69215	-0.804187	-0.360463	0.256675	0.0882375	-0.218513	-0.183772	0.572358	-0.496259	-0.639861	0.015093	-0.445072	-0.596963	0.837185	-0.329143	-0.376823	-0.58701	0.278347	0.124452	0.0901981	-0.053149	-0.10594	-0.124345	-0.213703	-0.26896	-0.344891	0.874542	0.246593	0.4685	0.508516	4
ketoconazole	[H]c1nc([H])n(c1[H])C([H])([H])C1(OC([H])([H])C([H])(O1)C([H])([H])Oc1c([H])c([H])c(c([H])c1[H])N1C([H])([H])C([H])([H])N(C(=O)C([H])([H])[H])C([H])([H])C1([H])[H])c1c([H])c([H])c(Cl)c([H])c1Cl	PMID: 23710083	Active	0.664541	1.16942	1.26673	-0.0579673	1.30105	1.29583	0.85015	-0.693538	0.815335	-0.69215	0.737598	0.769739	1.19886	1.15062	0.879403	1.17644	0.572358	0.847435	0.566391	0.015093	1.57452	1.21196	0.837185	-0.329143	-0.376823	0.176425	1.14544	1.06061	0.849587	0.718914	0.636272	1.01403	0.795068	0.71859	0.588207	-0.51976	1.0105	1.05514	0.705536	3
3-[4-(2-fluorobenzoyl)piperazin-1-yl]-6-(pyridin-2-yl)pyridazine	[H]c1nc(c([H])c([H])c1[H])-c1nnc(c([H])c1[H])N1C([H])([H])C([H])([H])N(C(=O)c2c([H])c([H])c([H])c([H])c2F)C([H])([H])C1([H])[H]	AID: 685510	Active	-0.246057	0.19519	0.212534	-0.201877	0.147562	0.148478	0.187781	-0.693538	-0.118101	-0.69215	-0.0332944	0.769739	0.256675	0.281398	0.0449866	0.496336	0.572358	0.175588	-0.0367353	0.988589	0.564727	0.307496	-0.242784	-0.329143	-0.376823	-0.470249	0.0559106	0.0626374	-0.166237	-0.149768	-0.244165	0.205266	0.0140168	0.0373498	-0.0580603	-1.0325	0.0688361	0.222022	0.0626566	4
3-(4-chlorophenyl)-6-[4-(2-ethoxypyridine-3-carbonyl)piperazin-1-yl]pyridazine	[H]c1nc(OC([H])([H])C([H])([H])[H])c(c([H])c1[H])C(=O)N1C([H])([H])C([H])([H])N(c2nnc(c([H])c2[H])-c2c([H])c([H])c(Cl)c([H])c2[H])C([H])([H])C1([H])[H]	AID: 685510	Active	0.284936	0.613077	0.607691	-0.00768322	0.562901	0.560677	0.518965	-0.693538	0.348617	-0.69215	0.352152	0.769739	0.570737	0.571138	0.352403	0.496336	0.572358	0.175588	-0.0367353	0.988589	0.564727	0.307496	-0.242784	-0.329143	-0.376823	-0.215499	0.499264	0.445861	0.130364	0.07469	-0.0646009	0.493108	0.18728	0.17461	0.0680423	-0.888575	0.432256	0.639171	0.319531	3
azathioprine	[H]c1nc2nc([H])nc(Sc3c(nc([H])n3C([H])([H])[H])N(=O)=O)c2n1[H]	PMID: 6023684	Active	-1.11513	-0.683566	-0.545782	0.917418	-0.443632	-0.44314	1.18133	-0.179785	-0.35146	-0.129583	1.12304	-0.360463	1.19886	-0.491242	-0.78943	-0.183772	0.572358	-0.496259	-0.639861	1.96209	-0.445072	-0.596963	-1.32275	-0.329143	-0.376823	-0.781611	-0.605428	-0.658868	-0.637868	-0.494242	-0.492803	-0.732713	-0.743212	-0.718634	-0.712144	-0.25889	-0.593196	-0.60632	-0.533434	4
(1S,7R,8S,12R,20R)-7-(furan-3-yl)-1,8,12,17,17-pentamethyl-5,16-dioxo-3,6,14-trioxahexacyclo[9.9.0.0?,?.0?,?.0??,??.0??,??]icosan-20-yl acetate	[H]c1oc([H])c(c1[H])C1([H])OC(=O)C2([H])OC22C1(C([H])([H])[H])C([H])([H])C([H])([H])C1([H])C3(C([H])([H])[H])C4([H])OC4([H])C(=O)C(C([H])([H])[H])(C([H])([H])[H])C3([H])C([H])([H])C([H])(OC(=O)C([H])([H])[H])C21C([H])([H])[H]	PMID: 19597541	Active	0.412188	0.801128	1.10315	0.758571	1.07544	1.0765	0.85015	-0.693538	-0.35146	-0.69215	1.12304	-0.360463	0.570737	1.15062	1.1429	2.53666	-0.875371	3.53482	2.97889	0.015093	2.58432	2.11641	-1.32275	2.98554	2.4431	1.4563	1.17251	1.18548	1.82419	2.26968	2.72777	1.33566	2.02083	2.47033	2.92222	0.0109745	0.777963	-0.0522937	-0.414139	2
bis(furan-2-carbonyl)-1,2,5-oxadiazol-2-ium-2-olate	[H]c1oc(c([H])c1[H])C(=O)c1non(=O)c1C(=O)c1oc([H])c([H])c1[H]	AID: 1011	Active	-1.22551	-0.83621	-0.538142	0.874708	-0.46478	-0.463858	0.85015	-0.693538	-0.118101	-0.69215	0.737598	-0.360463	0.570737	-0.394662	-0.78943	-0.183772	0.572358	-0.496259	-0.639861	1.96209	-0.445072	-0.596963	-1.32275	-0.329143	-0.376823	-1.17081	-0.708343	-0.791427	-0.883917	-0.861791	-0.864211	-0.654544	-0.709568	-0.678655	-0.679847	-0.861589	-0.555587	-0.557815	-0.574522	4
3-[4-(2-chlorobenzenesulfonyl)piperazin-1-yl]-6-(furan-2-yl)pyridazine	[H]c1oc(c([H])c1[H])-c1nnc(c([H])c1[H])N1C([H])([H])C([H])([H])N(C([H])([H])C1([H])[H])S(=O)(=O)c1c([H])c([H])c([H])c([H])c1Cl	AID: 685510	Active	-0.0943775	0.25646	0.310523	0.162525	0.43231	0.429623	0.518965	-0.693538	-0.118101	-0.69215	0.352152	-0.360463	0.884798	0.281398	0.00106995	0.496336	0.572358	0.175588	-0.0367353	0.988589	0.564727	0.307496	-0.242784	-0.329143	-0.376823	-0.392409	0.257853	0.44495	0.444995	0.641499	0.536303	0.118956	-0.0364799	-0.00889261	-0.0958508	-0.195922	0.175394	0.172768	0.0397626	3
bis(thiophene-2-carbonyl)-1,2,5-oxadiazol-2-ium-2-olate	[H]c1sc(c([H])c1[H])C(=O)c1non(=O)c1C(=O)c1sc([H])c([H])c1[H]	AID: 1011	Active	-0.680563	-0.547107	-0.378438	0.321793	-0.244192	-0.24432	0.187781	-0.693538	-0.118101	-0.69215	0.737598	-0.360463	0.570737	-0.394662	-0.78943	-0.183772	0.572358	-0.496259	-0.639861	1.96209	-0.445072	-0.596963	-1.32275	-0.329143	-0.376823	-1.17081	-0.449213	-0.338499	-0.342131	-0.255344	-0.296463	-0.654544	-0.709568	-0.678655	-0.679847	-0.105967	-0.459543	-0.431269	-0.487101	4
N-[3-(dimethylamino)propyl]-N-(4-fluoro-1,3-benzothiazol-2-yl)-2-(thiophen-2-yl)quinoline-4-carboxamide	[H]c1sc(c([H])c1[H])-c1nc2c([H])c([H])c([H])c([H])c2c(c1[H])C(=O)N(c1nc2c(F)c([H])c([H])c([H])c2s1)C([H])([H])C([H])([H])C([H])([H])N(C([H])([H])[H])C([H])([H])[H]	AID: 685511	Active	1.88867	1.218	1.01709	-0.473074	1.02092	1.02088	-0.143403	-0.693538	0.815335	-0.69215	0.352152	0.769739	0.570737	0.957458	0.571986	1.17644	2.02009	-0.496259	-0.639861	1.96209	-0.445072	-0.596963	0.837185	-0.329143	-0.376823	-0.497194	0.987787	1.06641	0.963446	0.864251	0.82296	0.776187	0.589055	0.377448	0.287892	-0.897571	0.732136	0.766946	0.348174	3
2-(2-(2-(4-(4-chlorophenyl)thiazol-2-yl)hydrazono)ethyl)isoindoline-1,3-dione	[H]c1sc(N=NC([H])([H])C([H])([H])N2C(=O)c3c([H])c([H])c([H])c([H])c3C2=O)nc1-c1c([H])c([H])c(Cl)c([H])c1[H]	PMID: 24165185	Active	1.03536	0.29753	0.341948	0.0667962	0.377259	0.37448	0.187781	-0.693538	0.115258	-0.69215	0.352152	1.89994	0.570737	0.281398	-0.174597	0.496336	0.572358	-0.496259	-0.0367353	0.015093	-0.445072	0.307496	0.837185	-0.329143	-0.376823	-0.802095	0.206684	0.235538	0.067272	0.0226811	-0.0475918	0.0533819	-0.117423	-0.132143	-0.198357	-0.627706	0.120351	0.193386	0.0255149	3
2-(2-{2-[4-(4-fluorophenyl)-1,3-thiazol-2-yl]hydrazin-1-ylidene}ethyl)-2,3-dihydro-1H-isoindole-1,3-dione	[H]c1sc(N=NC([H])([H])C([H])([H])N2C(=O)c3c([H])c([H])c([H])c([H])c3C2=O)nc1-c1c([H])c([H])c(F)c([H])c1[H]	PMID: 24165185	Active	0.736251	0.167379	0.240812	0.0667962	0.264308	0.264757	0.187781	-0.693538	0.115258	-0.69215	0.352152	1.89994	0.570737	0.281398	-0.174597	0.496336	0.572358	-0.496259	-0.0367353	0.015093	-0.445072	0.307496	0.837185	-0.329143	-0.376823	-0.802095	0.0867295	0.138232	-0.0574807	-0.0652795	-0.101407	0.0533819	-0.117423	-0.132143	-0.198357	-0.951544	0.0791321	0.136375	-0.0186664	3
2-(2-(2-(4-(4-methoxyphenyl)thiazol-2-yl)hydrazono)ethyl)isoindoline-1,3-dione	[H]c1sc(N=NC([H])([H])C([H])([H])N2C(=O)c3c([H])c([H])c([H])c([H])c3C2=O)nc1-c1c([H])c([H])c(OC([H])([H])[H])c([H])c1[H]	PMID: 24165185	Active	0.660353	0.337255	0.361314	0.26099	0.346926	0.347339	0.518965	-0.693538	0.348617	-0.69215	0.737598	1.89994	0.570737	0.377978	0.00106995	0.496336	0.572358	-0.496259	-0.0367353	0.015093	-0.445072	0.307496	0.837185	-0.329143	-0.376823	-0.64539	0.250219	0.247233	0.00586486	0.020524	-0.0411241	0.163116	-0.0535563	-0.0458594	-0.137905	-1.06849	0.178837	0.275076	-0.00914476	3
2-[(E)-2-[1-(3-bromophenyl)propylidene]hydrazin-1-yl]-4-(4-nitrophenyl)-1,3-thiazole	[H]c1sc(N=NC([H])(c2c([H])c([H])c([H])c(Br)c2[H])C([H])([H])C([H])([H])[H])nc1-c1c([H])c([H])c(c([H])c1[H])N(=O)=O	PMID: 24165185	Active	2.12434	0.352722	0.321768	0.187983	0.613772	0.607834	0.187781	-0.693538	0.348617	-0.69215	0.352152	-0.360463	0.570737	0.184818	-0.13068	-0.183772	0.572358	-0.496259	-0.639861	0.015093	-0.445072	-0.596963	0.837185	-0.329143	-0.376823	-0.58701	0.317812	0.279849	0.123954	-0.00526665	-0.0761454	-0.00957689	-0.19839	-0.244943	-0.347081	-0.222908	0.220859	0.429925	0.329342	3
cisplatin	[H]N([H])[Pt](Cl)(Cl)N([H])[H]	PMID: 22164376	Active	-1.66793	-1.85802	-1.66238	-0.416058	-0.301124	-0.306407	-1.13696	1.36147	-1.05154	0.432983	-1.18963	-0.360463	-0.371448	-1.84336	-1.53601	-2.2241	-1.59923	-0.496259	-0.639861	-0.958403	-0.445072	-0.596963	-1.32275	-0.329143	-0.376823	-1.17081	-1.31088	0.087849	1.1824	-1.7461	-1.56335	-1.9088	-1.66451	-1.56791	-1.38095	3.04993	-1.24466	-1.27258	11.8092	5
(3-aminopropyl)(dodecyl)amine	[H]N([H])C([H])([H])C([H])([H])C([H])([H])N([H])C([H])([H])C([H])([H])C([H])([H])C([H])([H])C([H])([H])C([H])([H])C([H])([H])C([H])([H])C([H])([H])C([H])([H])C([H])([H])C([H])([H])[H]	PMID: 24024211	Active	0.45511	-0.355975	-0.563576	-0.710398	-0.68263	-0.681995	-1.13696	0.847721	2.21549	0.432983	-1.18963	-0.360463	-1.31363	-0.684402	0.308486	-2.2241	-1.59923	-0.496259	-0.639861	-0.958403	-0.445072	-0.596963	-1.32275	-0.329143	-0.376823	2.33201	-0.364185	-0.178976	-0.502572	-0.60642	-0.670838	-0.0379728	-0.325086	-0.421856	-0.485931	1.90902	0.0491424	2.42172	4.34608	5
(2-aminoethyl)(dodecyl)amine	[H]N([H])C([H])([H])C([H])([H])N([H])C([H])([H])C([H])([H])C([H])([H])C([H])([H])C([H])([H])C([H])([H])C([H])([H])C([H])([H])C([H])([H])C([H])([H])C([H])([H])C([H])([H])[H]	PMID: 24024211	Active	0.228231	-0.474919	-0.668456	-0.710398	-0.778914	-0.778288	-1.13696	0.847721	1.98213	0.432983	-1.18963	-0.360463	-1.31363	-0.780982	0.176737	-2.2241	-1.59923	-0.496259	-0.639861	-0.958403	-0.445072	-0.596963	-1.32275	-0.329143	-0.376823	2.33201	-0.476391	-0.307699	-0.603634	-0.689	-0.724231	-0.167562	-0.426979	-0.504898	-0.539473	1.90902	-0.0714163	2.1608	3.64956	5
dispiro[adamantane-2,2'-[1,3,5]trioxolane-4',1''-cyclohexane]-4''-ylmethanamine	[H]N([H])C([H])([H])C1([H])C([H])([H])C([H])([H])C2(OOC3(O2)C2([H])C([H])([H])C4([H])C([H])([H])C([H])(C2([H])[H])C([H])([H])C3([H])C4([H])[H])C([H])([H])C1([H])[H]	PMID: 17283188	Active	-0.0586097	-0.39747	-0.27652	-0.380922	-0.332857	-0.332108	-0.474587	0.333968	-0.818178	-0.129583	-0.418741	-0.360463	-0.68551	-0.298082	0.176737	1.85655	-1.59923	3.53482	2.97889	-0.958403	0.564727	0.307496	-1.32275	5.19532	4.32305	2.33201	-0.239924	0.119826	0.443599	0.74836	1.06277	0.262839	0.628872	0.9405	1.25254	1.83706	-0.387921	-0.574513	-0.563046	2
N-(3-carbamoyl-5-phenylthiophen-2-yl)-1-methyl-1H-pyrazole-5-carboxamide	[H]N([H])C(=O)c1c([H])c(sc1N([H])C(=O)c1c([H])c([H])nn1C([H])([H])[H])-c1c([H])c([H])c([H])c([H])c1[H]	AID: 685510	Active	-0.327654	-0.0713297	-0.112701	0.382808	-0.106517	-0.106178	0.187781	0.847721	0.115258	0.432983	-0.0332944	1.89994	0.256675	-0.104922	-0.306347	-0.183772	0.572358	-0.496259	-0.639861	0.988589	-0.445072	-0.596963	-0.242784	-0.329143	-0.376823	-0.951887	-0.180908	-0.220613	-0.25792	-0.197561	-0.179746	-0.291509	-0.38166	-0.396696	-0.44914	-0.654692	-0.184191	-0.15244	-0.155006	4
nitrofurazone	[H]N([H])C(=O)N([H])N=C([H])c1oc(c([H])c1[H])N(=O)=O	PMID: 14070254	Active	-1.67101	-1.19864	-1.07789	1.09289	-0.986803	-0.985895	0.85015	0.847721	-0.118101	0.432983	-0.0332944	1.89994	0.570737	-0.974142	-1.05293	-1.54399	-0.875371	-0.496259	-0.639861	0.015093	-0.445072	-0.596963	-1.32275	-0.329143	-0.376823	-1.17081	-1.17983	-1.31213	-1.33348	-1.34149	-1.27749	-1.17875	-1.16283	-1.16103	-1.09429	-0.15994	-0.820561	-0.681109	-0.296995	4
arterolane	[H]N([H])C(C([H])([H])[H])(C([H])([H])[H])C([H])([H])N([H])C(=O)C([H])([H])C1([H])C([H])([H])C([H])([H])C2(OOC3(O2)C2([H])C([H])([H])C4([H])C([H])([H])C([H])(C2([H])[H])C([H])([H])C3([H])C4([H])[H])C([H])([H])C1([H])[H]	PMID: 20922422	Active	0.107086	0.293951	0.407903	0.231324	0.347612	0.348529	0.187781	0.847721	0.115258	0.432983	-0.0332944	0.769739	-0.0573867	0.377978	0.879403	1.85655	-1.59923	3.53482	2.97889	-0.958403	0.564727	0.307496	-1.32275	5.19532	4.32305	2.17279	0.49246	0.736466	1.22502	1.05622	1.33152	0.883628	1.41672	1.25008	1.52204	1.3603	0.334144	0.00527072	-0.0135182	2
2-amino-7-benzyl-1H,4H,5H-pyrrolo[3,2-d]pyrimidin-4-one	[H]N([H])C1=Nc2c(c([H])n([H])c2C(=O)N1[H])C([H])([H])c1c([H])c([H])c([H])c([H])c1[H]	AID: 459941	Active	-0.953213	-0.562338	-0.66332	0.331261	-0.697628	-0.696912	-0.143403	1.36147	-0.584819	0.99555	-0.804187	-0.360463	-0.371448	-0.587822	-0.613763	-0.183772	0.572358	-0.496259	-0.639861	0.988589	-0.445072	-0.596963	-0.242784	-0.329143	-0.376823	-0.901365	-0.740714	-0.742092	-0.766448	-0.744225	-0.694074	-0.604877	-0.591133	-0.560431	-0.509232	-0.321859	-0.714603	-0.680579	-0.587531	4
2-amino-7-[(3-chlorophenyl)methyl]-1H,4H,5H-pyrrolo[3,2-d]pyrimidin-4-one	[H]N([H])C1=Nc2c(c([H])n([H])c2C(=O)N1[H])C([H])([H])c1c([H])c([H])c([H])c(Cl)c1[H]	AID: 459941	Active	-0.573202	-0.433269	-0.493545	0.331261	-0.461191	-0.463586	-0.143403	1.36147	-0.584819	0.99555	-0.804187	-0.360463	-0.0573867	-0.491242	-0.613763	-0.183772	0.572358	-0.496259	-0.639861	0.988589	-0.445072	-0.596963	-0.242784	-0.329143	-0.376823	-0.901365	-0.573058	-0.619127	-0.600442	-0.646028	-0.58133	-0.579046	-0.54954	-0.544212	-0.487358	-0.0609894	-0.568132	-0.574061	-0.43274	4
2-amino-7-{[4-(propan-2-yl)phenyl]methyl}-1H,4H,5H-pyrrolo[3,2-d]pyrimidin-4-one	[H]N([H])C1=Nc2c(c([H])n([H])c2C(=O)N1[H])C([H])([H])c1c([H])c([H])c(c([H])c1[H])C([H])(C([H])([H])[H])C([H])([H])[H]	AID: 459941	Active	-0.299854	-0.199375	-0.348679	0.331261	-0.408775	-0.408033	-0.143403	1.36147	-0.35146	0.99555	-0.804187	-0.360463	-0.371448	-0.298082	-0.218513	-0.183772	0.572358	-0.496259	-0.639861	0.988589	-0.445072	-0.596963	-0.242784	-0.329143	-0.376823	-0.295108	-0.344004	-0.393493	-0.363212	-0.463716	-0.512741	-0.253933	-0.184579	-0.278353	-0.32739	-0.321859	-0.372293	-0.404851	-0.312851	4
2-amino-7-{[4-(benzyloxy)phenyl]methyl}-1H,4H,5H-pyrrolo[3,2-d]pyrimidin-4-one	[H]N([H])C1=Nc2c(c([H])n([H])c2C(=O)N1[H])C([H])([H])c1c([H])c([H])c(OC([H])([H])c2c([H])c([H])c([H])c([H])c2[H])c([H])c1[H]	AID: 459941	Active	-0.0348807	0.230466	0.103484	0.525455	0.030829	0.0316361	0.187781	1.36147	0.115258	0.99555	-0.418741	-0.360463	-0.0573867	0.184818	0.00106995	0.496336	1.29622	-0.496259	-0.639861	0.988589	-0.445072	-0.596963	0.837185	-0.329143	-0.376823	-0.820531	-0.0385754	-0.0552954	-0.214018	-0.280345	-0.331615	0.0865398	-0.0341571	-0.0939573	-0.145755	-1.20342	-0.0669505	0.0311093	-0.0491948	4
2-amino-7-(pyridin-4-ylmethyl)-1H,4H,5H-pyrrolo[3,2-d]pyrimidin-4-one	[H]N([H])C1=Nc2c(c([H])n([H])c2C(=O)N1[H])C([H])([H])c1c([H])c([H])nc([H])c1[H]	AID: 459941	Active	-1.30508	-0.619143	-0.676178	0.602459	-0.690846	-0.690074	0.187781	1.36147	-0.584819	0.99555	-0.418741	-0.360463	-0.0573867	-0.587822	-0.65768	-0.183772	0.572358	-0.496259	-0.639861	1.96209	-0.445072	-0.596963	-1.32275	-0.329143	-0.376823	-0.878911	-0.761365	-0.780778	-0.803647	-0.776853	-0.734747	-0.643824	-0.628638	-0.593242	-0.55002	-0.384827	-0.722515	-0.690826	-0.59508	4
2-amino-7-(pyridin-3-ylmethyl)-1H,4H,5H-pyrrolo[3,2-d]pyrimidin-4-one	[H]N([H])C1=Nc2c(c([H])n([H])c2C(=O)N1[H])C([H])([H])c1c([H])nc([H])c([H])c1[H]	AID: 459941	Active	-1.30508	-0.619143	-0.676178	0.602459	-0.690846	-0.690074	0.187781	1.36147	-0.584819	0.99555	-0.418741	-0.360463	-0.0573867	-0.587822	-0.65768	-0.183772	0.572358	-0.496259	-0.639861	1.96209	-0.445072	-0.596963	-1.32275	-0.329143	-0.376823	-0.878911	-0.761365	-0.780778	-0.801986	-0.786126	-0.73387	-0.643824	-0.626963	-0.602567	-0.549139	-0.384827	-0.722515	-0.690826	-0.59508	4
2-amino-7-(pyridin-2-ylmethyl)-1H,4H,5H-pyrrolo[3,2-d]pyrimidin-4-one	[H]N([H])C1=Nc2c(c([H])n([H])c2C(=O)N1[H])C([H])([H])c1nc([H])c([H])c([H])c1[H]	AID: 459941	Active	-1.30508	-0.619143	-0.676178	0.602459	-0.690846	-0.690074	0.187781	1.36147	-0.584819	0.99555	-0.418741	-0.360463	-0.0573867	-0.587822	-0.65768	-0.183772	0.572358	-0.496259	-0.639861	1.96209	-0.445072	-0.596963	-1.32275	-0.329143	-0.376823	-0.878911	-0.761365	-0.778186	-0.813476	-0.792986	-0.744456	-0.641215	-0.638548	-0.609465	-0.559756	-0.384827	-0.722515	-0.690826	-0.59508	4
sulphadimidine	[H]N([H])c1c([H])c([H])c(c([H])c1[H])S(=O)(=O)N([H])c1nc(c([H])c(n1)C([H])([H])[H])C([H])([H])[H]	PMID: 3088784	Active	-0.922831	-0.490356	-0.521228	0.550281	-0.436301	-0.435957	0.187781	0.847721	-0.35146	0.432983	-0.0332944	-0.360463	0.256675	-0.491242	-0.482013	-0.863881	-0.151506	-0.496259	-0.639861	0.015093	-0.445072	-0.596963	-0.242784	-0.329143	-0.376823	-0.58701	-0.455757	-0.376154	-0.286176	-0.43969	-0.477747	-0.620882	-0.591772	-0.726009	-0.696601	0.0469565	-0.389013	-0.467119	-0.0856595	4
prazosin	[H]N([H])c1nc(nc2c([H])c(OC([H])([H])[H])c(OC([H])([H])[H])c([H])c12)N1C([H])([H])C([H])([H])N(C(=O)c2oc([H])c([H])c2[H])C([H])([H])C1([H])[H]	PMID: 19597541	Active	-0.743608	0.300799	0.30089	0.739215	0.284928	0.285953	1.18133	0.333968	0.115258	-0.129583	1.12304	0.769739	0.884798	0.377978	0.220653	0.496336	0.572358	0.175588	-0.0367353	0.988589	0.564727	0.307496	-0.242784	-0.329143	-0.376823	-0.0646594	0.228903	0.0917303	-0.126536	-0.0703569	-0.165036	0.234555	0.0540451	0.117205	0.0212911	-1.15844	0.167361	0.161884	-0.101553	3
(10-2-(diethylamino)ethyl-9-acridanone(2-thiazolin- 2-yl)hydrazone)	[H]N([H])N(C1=NC([H])([H])C([H])([H])S1)c1c([H])c([H])c([H])c2C(=O)c3c([H])c([H])c([H])c([H])c3N(c12)C([H])([H])C([H])([H])N(C([H])([H])C([H])([H])[H])C([H])([H])C([H])([H])[H]	PMID: 2113009	Active	0.125755	0.843079	0.520241	-0.104254	0.464434	0.464818	0.187781	0.333968	0.581976	-0.129583	0.737598	-0.360463	0.256675	0.474558	0.52807	0.496336	0.572358	-0.496259	-0.0367353	0.015093	-0.445072	0.307496	0.837185	-0.329143	-0.376823	0.10294	0.557207	0.671374	0.374604	0.526019	0.457228	0.562652	0.253224	0.376169	0.308988	-0.132953	0.413769	0.50344	0.0747332	3
fluoxetine	[H]N(C([H])([H])[H])C([H])([H])C([H])([H])C([H])(Oc1c([H])c([H])c(c([H])c1[H])C(F)(F)F)c1c([H])c([H])c([H])c([H])c1[H]	PMID: 41672	Active	0.797842	-0.319558	-0.254864	-1.06365	-0.223552	-0.222629	-1.13696	-0.179785	0.581976	-0.129583	-1.18963	-0.360463	-0.371448	-0.201502	-0.174597	-0.863881	-0.151506	-0.496259	-0.639861	-0.958403	-0.445072	-0.596963	0.837185	-0.329143	-0.376823	-0.140572	-0.324035	-0.380598	-0.543353	-0.598362	-0.656312	-0.240952	-0.366202	-0.413753	-0.471364	0.172893	-0.0181227	0.175943	0.367162	4
nortriptyline	[H]N(C([H])([H])[H])C([H])([H])C([H])([H])C([H])=C1c2c([H])c([H])c([H])c([H])c2C([H])([H])C([H])([H])c2c([H])c([H])c([H])c([H])c12	PMID: 20060828	Active	0.443885	-0.161997	-0.363217	-1.25784	-0.538941	-0.538437	-1.46814	-0.179785	-0.35146	-0.129583	-1.57508	-0.360463	-1.6277	-0.394662	-0.13068	-0.183772	-0.151506	-0.496259	-0.0367353	-0.958403	-0.445072	-0.596963	0.837185	-0.329143	0.563152	-0.249018	-0.35661	-0.284575	-0.431079	-0.342248	-0.283075	-0.144282	-0.253004	-0.156206	-0.0970793	0.307826	-0.406771	-0.150514	-0.312494	4
N-ethyldodecanamine	[H]N(C([H])([H])C([H])([H])[H])C([H])([H])C([H])([H])C([H])([H])C([H])([H])C([H])([H])C([H])([H])C([H])([H])C([H])([H])C([H])([H])C([H])([H])C([H])([H])C([H])([H])[H]	PMID: 8604112	Active	0.845416	-0.562005	-0.756446	-1.25784	-0.88198	-0.881419	-1.46814	-0.179785	1.74877	-0.129583	-1.57508	-0.360463	-1.6277	-0.877562	0.0889032	-2.2241	-1.59923	-0.496259	-0.639861	-0.958403	-0.445072	-0.596963	-1.32275	-0.329143	-0.376823	2.33201	-0.52153	-0.359483	-0.65655	-0.713825	-0.74571	-0.219694	-0.48033	-0.529861	-0.561013	1.94501	-0.187153	1.91031	3.66349	5
4-(4-fluorobenzenesulfonyl)-N-{4H-thiochromeno[4,3-d][1,3]thiazol-2-yl}butanamide	[H]N(C(=O)C([H])([H])C([H])([H])C([H])([H])S(=O)(=O)c1c([H])c([H])c(F)c([H])c1[H])c1nc-2c(s1)C([H])([H])Sc1c([H])c([H])c([H])c([H])c-21	AID: 685509	Active	0.979589	0.546791	0.542276	0.0907811	0.732186	0.731697	-0.143403	-0.179785	0.581976	-0.129583	0.352152	0.769739	0.884798	0.474558	0.0889032	0.496336	0.572358	-0.496259	-0.0367353	0.015093	-0.445072	0.307496	0.837185	-0.329143	-0.376823	-0.470249	0.539449	0.993752	1.10842	1.22263	1.18672	0.247348	0.0858676	-0.0113148	-0.0919846	-0.0250075	0.427633	0.421238	0.375182	3
3-{1,4-dimethyl-2,3,5,6-tetraoxabicyclo[2.2.1]heptan-7-yl}-N-(2-phenylethyl)propanamide	[H]N(C(=O)C([H])([H])C([H])([H])C1([H])C2(OOC1(OO2)C([H])([H])[H])C([H])([H])[H])C([H])([H])C([H])([H])c1c([H])c([H])c([H])c([H])c1[H]	AID:704018	Active	-0.561512	-0.390893	-0.228169	-0.121927	-0.237177	-0.236316	0.187781	-0.179785	0.581976	-0.129583	-0.0332944	0.769739	-0.0573867	-0.201502	-0.0428467	-0.183772	-0.875371	0.847435	0.566391	-0.958403	1.57452	1.21196	-0.242784	-0.329143	-0.376823	0.799523	-0.228204	-0.246315	-0.225917	-0.262533	-0.304814	-0.105765	-0.0461534	-0.0760455	-0.11888	0.65865	-0.130896	-0.175847	-0.151653	5
ethyl 2-(3-{1,4-dimethyl-2,3,5,6-tetraoxabicyclo[2.2.1]heptan-7-yl}propanamido)acetate	[H]N(C(=O)C([H])([H])C([H])([H])C1([H])C2(OOC1(OO2)C([H])([H])[H])C([H])([H])[H])C([H])([H])C(=O)OC([H])([H])C([H])([H])[H]	AID:704018	Active	-1.53835	-0.739017	-0.443239	0.431409	-0.361158	-0.36016	0.85015	-0.179785	0.815335	-0.129583	0.737598	0.769739	0.570737	-0.394662	-0.218513	-0.863881	-1.59923	0.847435	0.566391	-0.958403	1.57452	1.21196	-1.32275	-0.329143	-0.376823	1.7482	-0.398037	-0.505475	-0.512847	-0.556966	-0.564585	-0.366668	-0.335445	-0.372125	-0.37938	0.883538	-0.161326	-0.259246	-0.17872	5
N-benzyl-3-{1,4-dimethyl-2,3,5,6-tetraoxabicyclo[2.2.1]heptan-7-yl}propanamide	[H]N(C(=O)C([H])([H])C([H])([H])C1([H])C2(OOC1(OO2)C([H])([H])[H])C([H])([H])[H])C([H])([H])c1c([H])c([H])c([H])c([H])c1[H]	AID:704018	Active	-0.586229	-0.516278	-0.333049	-0.121927	-0.333461	-0.332608	0.187781	-0.179785	0.348617	-0.129583	-0.0332944	0.769739	-0.0573867	-0.298082	-0.174597	-0.183772	-0.875371	0.847435	0.566391	-0.958403	1.57452	1.21196	-0.242784	-0.329143	-0.376823	0.697357	-0.340411	-0.375039	-0.318308	-0.348464	-0.387861	-0.235355	-0.139305	-0.162457	-0.20216	0.65865	-0.246642	-0.328111	-0.223375	5
3-{1,4-dimethyl-2,3,5,6-tetraoxabicyclo[2.2.1]heptan-7-yl}-N-(propan-2-yl)propanamide	[H]N(C(=O)C([H])([H])C([H])([H])C1([H])C2(OOC1(OO2)C([H])([H])[H])C([H])([H])[H])C([H])(C([H])([H])[H])C([H])([H])[H]	AID:704018	Active	-1.04673	-0.902967	-0.700952	-0.121927	-0.663245	-0.662386	0.187781	-0.179785	0.115258	-0.129583	-0.0332944	0.769739	-0.0573867	-0.684402	-0.350263	-0.863881	-1.59923	0.847435	0.566391	-0.958403	1.57452	1.21196	-1.32275	-0.329143	-0.376823	2.01357	-0.581057	-0.677388	-0.472697	-0.656649	-0.597482	-0.539738	-0.294964	-0.472366	-0.412369	1.3603	-0.452525	-0.635373	-0.395811	5
N-cyclohexyl-3-{1,4-dimethyl-2,3,5,6-tetraoxabicyclo[2.2.1]heptan-7-yl}propanamide	[H]N(C(=O)C([H])([H])C([H])([H])C1([H])C2(OOC1(OO2)C([H])([H])[H])C([H])([H])[H])C1([H])C([H])([H])C([H])([H])C([H])([H])C([H])([H])C1([H])[H]	AID:704018	Active	-0.509168	-0.600597	-0.402885	-0.121927	-0.388231	-0.387356	0.187781	-0.179785	0.115258	-0.129583	-0.0332944	0.769739	-0.0573867	-0.394662	-0.0428467	-0.183772	-1.59923	1.51928	1.16952	-0.958403	1.57452	1.21196	-1.32275	0.77575	0.563152	2.08181	-0.337392	-0.249564	-0.135334	-0.125827	-0.10515	-0.109036	0.045175	0.061425	0.0813451	1.3603	-0.272048	-0.3609	-0.302392	5
N-(adamantan-1-yl)-3-{1,4-dimethyl-2,3,5,6-tetraoxabicyclo[2.2.1]heptan-7-yl}propanamide	[H]N(C(=O)C([H])([H])C([H])([H])C1([H])C2(OOC1(OO2)C([H])([H])[H])C([H])([H])[H])C12C([H])([H])C3([H])C([H])([H])C([H])(C([H])([H])C([H])(C3([H])[H])C1([H])[H])C2([H])[H]	AID:704018	Active	-0.139218	-0.239154	-0.0165124	-0.121927	-0.0307704	-0.0298816	0.187781	-0.179785	0.115258	-0.129583	-0.0332944	0.769739	-0.0573867	-0.00834246	0.308486	1.85655	-1.59923	3.53482	2.97889	-0.958403	1.57452	1.21196	-1.32275	4.09043	3.38308	2.13741	0.0373899	0.234365	0.677497	0.737294	1.20841	0.378149	0.864695	0.929372	1.39859	1.3603	-0.115299	-0.444535	-0.409734	2
3-{1-tert-butyl-4-oxo-1H,4H,5H-pyrazolo[3,4-d]pyrimidin-5-yl}-N-[(2-chlorophenyl)methyl]propanamide	[H]N(C(=O)C([H])([H])C([H])([H])N1C([H])=Nc2c(c([H])nn2C(C([H])([H])[H])(C([H])([H])[H])C([H])([H])[H])C1=O)C([H])([H])c1c([H])c([H])c([H])c([H])c1Cl	AID: 685510	Active	-0.206625	0.321944	0.30619	0.210285	0.315563	0.313344	0.518965	-0.179785	0.581976	-0.129583	0.352152	0.769739	0.570737	0.281398	0.220653	-0.183772	0.572358	-0.496259	-0.639861	0.988589	-0.445072	-0.596963	-0.242784	-0.329143	-0.376823	0.1197	0.325746	0.14661	0.257408	-0.150004	-0.304435	0.191843	0.323795	-0.0923242	-0.205259	-0.420809	0.312154	0.230094	0.261089	3
N-(2H-1,3-benzodioxol-5-yl)-3-{1-tert-butyl-4-oxo-1H,4H,5H-pyrazolo[3,4-d]pyrimidin-5-yl}propanamide	[H]N(C(=O)C([H])([H])C([H])([H])N1C([H])=Nc2c(c([H])nn2C(C([H])([H])[H])(C([H])([H])[H])C([H])([H])[H])C1=O)c1c([H])c([H])c2OC([H])([H])Oc2c1[H]	AID: 685510	Active	-0.556975	0.267741	0.288361	0.598672	0.284928	0.285953	1.18133	-0.179785	0.348617	-0.129583	1.12304	0.769739	0.884798	0.377978	0.220653	0.496336	0.572358	-0.496259	-0.0367353	0.988589	-0.445072	0.307496	-0.242784	-0.329143	-0.376823	0.1197	0.263106	0.113715	0.211924	-0.201057	-0.273989	0.256688	0.39529	-0.0142258	-0.087968	-1.0415	0.182281	0.00674925	-0.0472883	3
3-{4-oxo-1-phenyl-1H,4H,5H-pyrazolo[3,4-d]pyrimidin-5-yl}-N-(1,3-thiazol-2-yl)propanamide	[H]N(C(=O)C([H])([H])C([H])([H])N1C([H])=Nc2c(c([H])nn2-c2c([H])c([H])c([H])c([H])c2[H])C1=O)c1nc([H])c([H])s1	AID: 685510	Active	-0.579076	0.161859	0.137938	0.481482	0.168223	0.168679	0.85015	-0.179785	0.348617	-0.129583	1.12304	0.769739	0.884798	0.184818	-0.174597	0.496336	1.29622	-0.496259	-0.639861	1.96209	-0.445072	-0.596963	-0.242784	-0.329143	-0.376823	-0.758717	0.0183762	0.0678046	-0.122939	-0.174447	-0.239183	-0.0175195	-0.20014	-0.229165	-0.286549	-1.01451	-0.0430373	0.0643475	-0.113413	4
N-(5-chloro-2-methoxyphenyl)-2-({5-[2-(4-fluorophenyl)acetamido]-1,3,4-thiadiazol-2-yl}sulfanyl)acetamide; methane	[H]N(C(=O)C([H])([H])c1c([H])c([H])c(F)c([H])c1[H])c1nnc(SC([H])([H])C(=O)N([H])c2c([H])c(Cl)c([H])c([H])c2OC([H])([H])[H])s1	AID: 685510	Active	0.690945	0.613074	0.685579	0.450134	0.858357	0.85533	0.518965	0.333968	1.28205	0.432983	0.737598	1.89994	1.51292	0.571138	0.0889032	-0.183772	0.572358	-0.496259	-0.639861	0.015093	-0.445072	-0.596963	0.837185	-0.329143	-0.376823	-0.617736	0.597337	0.573929	0.488797	0.313561	0.188543	0.154972	-0.085367	-0.271502	-0.369557	-0.4388	0.662246	0.97423	1.03377	3
N-{2-[(4-benzylpiperazin-1-yl)sulfonyl]ethyl}-2-(2-methylphenoxy)acetamide	[H]N(C(=O)C([H])([H])Oc1c([H])c([H])c([H])c([H])c1C([H])([H])[H])C([H])([H])C([H])([H])S(=O)(=O)N1C([H])([H])C([H])([H])N(C([H])([H])c2c([H])c([H])c([H])c([H])c2[H])C([H])([H])C1([H])[H]	AID: 685510	Active	-0.82909	0.632708	0.581618	0.150112	0.61544	0.615927	0.518965	-0.179785	1.28205	-0.129583	-0.0332944	0.769739	0.570737	0.571138	0.65982	-0.183772	-0.151506	0.175588	-0.0367353	-0.958403	0.564727	0.307496	0.837185	-0.329143	-0.376823	0.262159	0.608284	0.829712	0.753769	0.690555	0.446993	0.56044	0.339703	0.225247	0.0619811	-0.195922	0.694055	1.02361	1.0824	3
N-(3-cyanothiophen-2-yl)-2,2-diphenylacetamide	[H]N(C(=O)C([H])(c1c([H])c([H])c([H])c([H])c1[H])c1c([H])c([H])c([H])c([H])c1[H])c1sc([H])c([H])c1C#N	AID: 685510	Active	0.771891	0.00483856	-0.0750666	-0.398174	-0.161293	-0.161149	-0.805772	-0.179785	0.115258	-0.129583	-0.804187	0.769739	-0.68551	-0.104922	-0.306347	-0.183772	0.572358	-0.496259	-0.639861	0.015093	-0.445072	-0.596963	0.837185	-0.329143	-0.376823	-0.986454	-0.188217	-0.118695	-0.256534	-0.21703	-0.194477	-0.205274	-0.341045	-0.321592	-0.325366	-0.627706	-0.180718	0.0698969	-0.0467648	4
N-{2-[(2,3-dihydro-1,4-benzodioxin-6-yl)carbamoyl]-1-benzofuran-3-yl}-9H-xanthene-9-carboxamide	[H]N(C(=O)C1([H])c2c([H])c([H])c([H])c([H])c2Oc2c([H])c([H])c([H])c([H])c12)c1c(oc2c([H])c([H])c([H])c([H])c12)C(=O)N([H])c1c([H])c([H])c2OC([H])([H])C([H])([H])Oc2c1[H]	AID: 685510	Active	1.90147	1.36094	1.31352	0.572583	1.2124	1.21337	0.85015	0.333968	0.348617	0.432983	0.352152	1.89994	0.570737	1.44036	0.747653	2.53666	2.02009	-0.496259	0.566391	0.015093	-0.445072	1.21196	2.99712	-0.329143	-0.376823	-0.83183	1.00438	1.0372	0.681016	0.6249	0.583541	1.18639	0.868243	0.81635	0.771969	-2.73265	0.772385	0.682159	0.203393	3
5-oxo-N-(4-{[(pyridin-2-ylmethyl)carbamoyl]methyl}-1,3-thiazol-2-yl)pyrrolidine-2-carboxamide	[H]N(C(=O)C1([H])N([H])C(=O)C([H])([H])C1([H])[H])c1nc(c([H])s1)C([H])([H])C(=O)N([H])C([H])([H])c1nc([H])c([H])c([H])c1[H]	AID: 685510	Active	-1.42436	-0.0130558	0.0770443	0.868186	0.120208	0.120692	0.85015	0.847721	0.815335	0.99555	0.352152	3.03014	0.884798	0.0882375	-0.0867633	-0.183772	-0.151506	0.175588	-0.0367353	0.988589	0.564727	0.307496	-1.32275	-0.329143	-0.376823	-0.0761818	-0.02149	0.0447776	-0.116541	-0.198024	-0.247393	-0.0407014	-0.18318	-0.294298	-0.366781	-0.546746	0.0620863	0.313814	0.484258	3
N-{4H-thiochromeno[4,3-d][1,3]thiazol-2-yl}-1-(thiophene-2-sulfonyl)pyrrolidine-2-carboxamide	[H]N(C(=O)C1([H])N(C([H])([H])C([H])([H])C1([H])[H])S(=O)(=O)c1sc([H])c([H])c1[H])c1nc-2c(s1)C([H])([H])Sc1c([H])c([H])c([H])c([H])c-21	AID: 685509	Active	0.701356	0.638144	0.620202	0.158949	0.835596	0.834593	0.187781	-0.179785	0.115258	-0.129583	0.737598	0.769739	1.19886	0.474558	0.0889032	1.17644	0.572358	0.175588	0.566391	0.988589	0.564727	1.21196	-0.242784	-0.329143	-0.376823	-0.249018	0.665444	1.21618	1.45902	1.92888	2.08029	0.29828	0.163853	0.184737	0.182195	0.433763	0.330743	0.228199	-0.00627618	3
N-{4H-thiochromeno[4,3-d][1,3]thiazol-2-yl}-2,3-dihydro-1,4-benzodioxine-2-carboxamide	[H]N(C(=O)C1([H])Oc2c([H])c([H])c([H])c([H])c2OC1([H])[H])c1nc-2c(s1)C([H])([H])Sc1c([H])c([H])c([H])c([H])c-21	AID: 685509	Active	0.657853	0.254808	0.246754	-0.239116	0.278462	0.278294	-0.143403	-0.179785	-0.35146	-0.129583	0.352152	0.769739	0.256675	0.184818	-0.174597	1.17644	0.572358	-0.496259	0.566391	0.015093	-0.445072	1.21196	0.837185	-0.329143	-0.376823	-0.617736	0.152328	0.379638	0.3423	0.516996	0.60847	0.0573342	-0.0787038	-0.0832236	-0.104699	-0.276881	-0.0952666	-0.0791414	-0.247525	3
ethyl 2-(2,3-dihydro-1,4-benzodioxine-2-amido)-5,5,7,7-tetramethyl-4H,5H,6H,7H-thieno[2,3-c]pyridine-3-carboxylate	[H]N(C(=O)C1([H])Oc2c([H])c([H])c([H])c([H])c2OC1([H])[H])c1sc2c(c1C(=O)OC([H])([H])C([H])([H])[H])C([H])([H])C(N([H])C2(C([H])([H])[H])C([H])([H])[H])(C([H])([H])[H])C([H])([H])[H]	AID: 685510	Active	0.464997	0.695578	0.703346	0.296125	0.70464	0.705132	0.518965	0.333968	0.348617	0.432983	0.737598	0.769739	0.570737	0.667718	0.65982	0.496336	-0.151506	-0.496259	0.566391	0.015093	-0.445072	1.21196	-0.242784	-0.329143	-0.376823	0.504449	0.793768	0.702636	0.910896	0.639104	0.847375	0.637952	0.805875	0.31421	0.493426	-0.33985	0.618716	0.312582	0.243571	3
2-oxo-N-(4-{[(pyridin-4-ylmethyl)carbamoyl]methyl}-1,3-thiazol-2-yl)-1,2-dihydropyridine-3-carboxamide	[H]N(C(=O)C1=C([H])C([H])=C([H])N([H])C1=O)c1nc(c([H])s1)C([H])([H])C(=O)N([H])C([H])([H])c1c([H])c([H])nc([H])c1[H]	AID: 685510	Active	-1.00358	0.121461	0.147453	0.947294	0.188816	0.189288	0.85015	0.847721	0.815335	0.99555	0.352152	1.89994	0.884798	0.184818	-0.13068	-0.183772	0.572358	-0.496259	-0.639861	1.96209	-0.445072	-0.596963	-1.32275	-0.329143	-0.376823	-0.758717	0.0166715	0.0176939	-0.187028	-0.272184	-0.348566	-0.0679673	-0.254247	-0.368873	-0.464857	-1.01451	0.118061	0.398747	0.405789	4
N-(4-{[(2,3-dihydro-1,4-benzodioxin-6-yl)carbamoyl]methyl}-1,3-thiazol-2-yl)-2-oxo-1,2-dihydropyridine-3-carboxamide	[H]N(C(=O)C1=C([H])C([H])=C([H])N([H])C1=O)c1nc(c([H])s1)C([H])([H])C(=O)N([H])c1c([H])c([H])c2OC([H])([H])C([H])([H])Oc2c1[H]	AID: 685510	Active	-0.597338	0.378515	0.417137	1.06448	0.484121	0.484677	1.18133	0.847721	0.581976	0.99555	0.737598	1.89994	1.19886	0.474558	0.0449866	0.496336	0.572358	-0.496259	-0.0367353	0.988589	-0.445072	0.307496	-0.242784	-0.329143	-0.376823	-0.617736	0.254545	0.276714	0.0343361	-0.0673088	-0.108296	0.192795	-0.0310615	-0.162852	-0.223912	-1.31136	0.262732	0.393831	0.346053	3
N-{4-[2-(2-methyl-2,3-dihydro-1H-indol-1-yl)-2-oxoethyl]-1,3-thiazol-2-yl}-2-oxo-1,2-dihydropyridine-3-carboxamide	[H]N(C(=O)C1=C([H])C([H])=C([H])N([H])C1=O)c1nc(c([H])s1)C([H])([H])C(=O)N1c2c([H])c([H])c([H])c([H])c2C([H])([H])C1([H])C([H])([H])[H]	AID: 685510	Active	-0.267052	0.40511	0.356958	0.49116	0.360764	0.361187	0.518965	0.333968	0.348617	0.432983	-0.0332944	1.89994	0.570737	0.377978	0.0889032	0.496336	0.572358	-0.496259	-0.0367353	0.988589	-0.445072	0.307496	-0.242784	-0.329143	-0.376823	-0.470249	0.266972	0.314889	0.188402	0.156341	0.188529	0.231227	0.124272	0.0620483	0.0737453	-0.951544	0.193763	0.197721	0.00648474	3
6-oxo-N-(4-{[(thiophen-2-ylmethyl)carbamoyl]methyl}-1,3-thiazol-2-yl)-1,6-dihydropyridine-3-carboxamide	[H]N(C(=O)C1=C([H])N([H])C(=O)C([H])=C1[H])c1nc(c([H])s1)C([H])([H])C(=O)N([H])C([H])([H])c1sc([H])c([H])c1[H]	AID: 685510	Active	-0.615949	0.123574	0.12143	0.676097	0.223418	0.223373	0.518965	0.847721	0.815335	0.99555	0.352152	1.89994	0.884798	0.0882375	-0.218513	-0.183772	0.572358	-0.496259	-0.639861	1.96209	-0.445072	-0.596963	-1.32275	-0.329143	-0.376823	-0.73296	0.048437	0.148586	0.0373103	-0.0414999	-0.135676	-0.164182	-0.325552	-0.444541	-0.527462	-0.51976	0.0655826	0.319094	0.489392	4
N-[3-methyl-1-(4-oxo-6-propyl-1,4-dihydropyrimidin-2-yl)-1H-pyrazol-5-yl]adamantane-1-carboxamide	[H]N(C(=O)C12C([H])([H])C3([H])C([H])([H])C([H])(C([H])([H])C([H])(C3([H])[H])C1([H])[H])C2([H])[H])c1c([H])c(nn1C1=NC(=C([H])C(=O)N1[H])C([H])([H])C([H])([H])C([H])([H])[H])C([H])([H])[H]	AID: 685509	Active	0.179273	0.457111	0.443651	0.438772	0.367978	0.368897	0.518965	0.333968	0.348617	0.432983	-0.0332944	0.769739	0.256675	0.474558	0.615903	1.85655	-0.151506	2.19113	1.77264	0.988589	-0.445072	-0.596963	-1.32275	4.09043	3.38308	1.05825	0.464924	0.620159	0.775409	0.72611	1.15582	0.766538	0.963412	0.918126	1.34586	-0.213913	0.249256	0.0463031	-0.0486415	2
N-[2-({3-phenyl-[1,2,4]triazolo[4,3-b]pyridazin-6-yl}oxy)ethyl]-2-(trifluoromethyl)benzamide	[H]N(C(=O)c1c([H])c([H])c([H])c([H])c1C(F)(F)F)C([H])([H])C([H])([H])Oc1nn2c(nnc2c([H])c1[H])-c1c([H])c([H])c([H])c([H])c1[H]	AID: 685510	Active	0.323205	0.342309	0.512468	0.201869	0.586802	0.588017	0.518965	-0.179785	0.815335	-0.129583	0.352152	0.769739	1.19886	0.667718	0.13282	0.496336	1.29622	-0.496259	-0.639861	0.988589	-0.445072	-0.596963	0.837185	-0.329143	-0.376823	-0.67041	0.274911	0.197338	-0.101046	-0.215375	-0.299022	0.340873	0.0797444	-0.0286243	-0.113071	-1.57223	0.460001	0.465914	0.358957	3
3-(ethanesulfonyl)-N-{4H-thiochromeno[4,3-d][1,3]thiazol-2-yl}benzamide	[H]N(C(=O)c1c([H])c([H])c([H])c(c1[H])S(=O)(=O)C([H])([H])C([H])([H])[H])c1nc-2c(s1)C([H])([H])Sc1c([H])c([H])c([H])c([H])c-21	AID: 685509	Active	0.81337	0.438732	0.368757	0.0907811	0.512415	0.511802	-0.143403	-0.179785	0.115258	-0.129583	0.352152	0.769739	0.570737	0.281398	-0.0428467	0.496336	0.572358	-0.496259	-0.0367353	0.015093	-0.445072	0.307496	0.837185	-0.329143	-0.376823	-0.617736	0.413743	0.843035	1.00264	1.13031	0.928825	0.0956168	-0.0695115	-0.0745596	-0.176604	0.037961	0.205248	0.121483	0.0275482	3
imatinib	[H]N(C(=O)c1c([H])c([H])c(c([H])c1[H])C([H])([H])N1C([H])([H])C([H])([H])N(C([H])([H])[H])C([H])([H])C1([H])[H])c1c([H])c([H])c(c(N([H])c2nc([H])c([H])c(n2)-c2c([H])nc([H])c([H])c2[H])c1[H])C([H])([H])[H]	PMID: 24037106	Active	0.888174	1.40896	1.21962	0.304331	1.04141	1.04238	0.85015	0.333968	0.815335	0.432983	0.737598	0.769739	0.570737	1.2472	1.05507	1.17644	1.29622	0.175588	-0.0367353	0.988589	0.564727	0.307496	0.837185	-0.329143	-0.376823	-0.325305	1.09707	1.01414	0.731747	0.548419	0.263887	1.16317	0.91939	0.739441	0.451418	-1.74315	0.968984	1.21147	1.01486	3
N-{10,13-dioxa-4-thia-6-azatricyclo[7.4.0.0?,?]trideca-1(9),2,5,7-tetraen-5-yl}-4-[methyl(oxolan-2-ylmethyl)sulfamoyl]benzamide; methane	[H]N(C(=O)c1c([H])c([H])c(c([H])c1[H])S(=O)(=O)N(C([H])([H])[H])C([H])([H])C1([H])OC([H])([H])C([H])([H])C1([H])[H])c1nc2c([H])c3OC([H])([H])C([H])([H])Oc3c([H])c2s1	AID: 685510	Active	0.032642	0.81388	0.855778	0.741529	1.01368	1.01382	1.18133	-0.179785	0.581976	-0.129583	1.12304	0.769739	1.51292	0.860878	0.52807	1.17644	0.572358	0.175588	0.566391	0.015093	0.564727	1.21196	0.837185	-0.329143	-0.376823	0.10294	0.841919	1.1159	1.17905	1.16995	0.953649	0.680766	0.484018	0.391664	0.254929	-0.474782	0.671412	0.589821	0.381599	3
4-[(furan-2-ylmethyl)(methyl)sulfamoyl]-N-{4H-thiochromeno[4,3-d][1,3]thiazol-2-yl}benzamide	[H]N(C(=O)c1c([H])c([H])c(c([H])c1[H])S(=O)(=O)N(C([H])([H])[H])C([H])([H])c1oc([H])c([H])c1[H])c1nc-2c(s1)C([H])([H])Sc1c([H])c([H])c([H])c([H])c-21	AID: 685509	Active	1.17401	0.944545	0.924827	0.435406	1.06892	1.06845	0.518965	-0.179785	0.581976	-0.129583	0.737598	0.769739	1.19886	0.860878	0.352403	1.17644	1.29622	-0.496259	-0.0367353	0.988589	-0.445072	0.307496	0.837185	-0.329143	-0.376823	-0.713923	0.903683	1.2258	1.34571	1.49101	1.30432	0.53595	0.343638	0.258187	0.10942	-0.645697	0.649666	0.560807	0.313976	3
N-{5-[({[(2-chlorophenyl)methyl]carbamoyl}methyl)sulfanyl]-1,3,4-thiadiazol-2-yl}-2,4-dimethoxybenzamide; methane	[H]N(C(=O)c1c([H])c([H])c(OC([H])([H])[H])c([H])c1OC([H])([H])[H])c1nnc(SC([H])([H])C(=O)N([H])C([H])([H])c2c([H])c([H])c([H])c([H])c2Cl)s1	AID: 685510	Active	0.468952	0.752976	0.80608	0.644327	0.940975	0.937912	0.85015	0.333968	1.51541	0.432983	1.12304	1.89994	1.51292	0.667718	0.26457	-0.183772	0.572358	-0.496259	-0.639861	0.015093	-0.445072	-0.596963	0.837185	-0.329143	-0.376823	-0.470249	0.760827	0.68447	0.52168	0.481594	0.257342	0.266256	-0.0437871	-0.149438	-0.317357	-0.555742	0.764786	1.13417	1.00601	3
N-(4,7-dichloro-1,3-benzothiazol-2-yl)-4-ethoxybenzamide	[H]N(C(=O)c1c([H])c([H])c(OC([H])([H])C([H])([H])[H])c([H])c1[H])c1nc2c(Cl)c([H])c([H])c(Cl)c2s1	AID: 685510	Active	1.27422	0.0773203	0.0595852	-0.43331	0.174064	0.168059	-0.474587	-0.179785	0.115258	-0.129583	-0.418741	0.769739	0.256675	-0.104922	-0.39418	-0.183772	0.572358	-0.496259	-0.639861	0.015093	-0.445072	-0.596963	0.837185	-0.329143	-0.376823	-0.73296	0.0246878	-0.019495	-0.109041	-0.0599035	-0.0886005	-0.284959	-0.450952	-0.481716	-0.508511	0.343808	-0.0554479	0.0272886	-0.00817736	4
1-methyl-N-{4H-thiochromeno[4,3-d][1,3]thiazol-2-yl}-1H-pyrazole-5-carboxamide	[H]N(C(=O)c1c([H])c([H])nn1C([H])([H])[H])c1nc-2c(s1)C([H])([H])Sc1c([H])c([H])c([H])c([H])c-21	AID: 685510	Active	0.196825	-0.101263	-0.131889	-0.252582	-0.0925071	-0.0927021	-0.143403	-0.179785	-0.35146	-0.129583	0.352152	0.769739	0.256675	-0.201502	-0.438096	0.496336	0.572358	-0.496259	-0.0367353	0.988589	-0.445072	0.307496	-0.242784	-0.329143	-0.376823	-0.70377	-0.14302	0.00482832	0.0395041	0.25269	0.358719	-0.319997	-0.383992	-0.349008	-0.351769	0.073943	-0.358761	-0.360137	-0.424275	4
2,5-dichloro-N-{3-[6-(ethanesulfonyl)pyridazin-3-yl]phenyl}benzamide	[H]N(C(=O)c1c([H])c(Cl)c([H])c([H])c1Cl)c1c([H])c([H])c([H])c(c1[H])-c1nnc(c([H])c1[H])S(=O)(=O)C([H])([H])C([H])([H])[H]	AID: 685510	Active	0.833493	0.448444	0.478698	0.361979	0.648127	0.642262	0.187781	-0.179785	0.348617	-0.129583	-0.0332944	0.769739	0.884798	0.377978	-0.0428467	-0.183772	0.572358	-0.496259	-0.639861	0.015093	-0.445072	-0.596963	0.837185	-0.329143	-0.376823	-0.802095	0.435285	0.546602	0.587604	0.386021	-0.0573355	0.0683332	-0.110344	-0.189046	-0.346953	-0.249895	0.451726	0.423435	0.366826	3
5-chloro-N-(2-{[3-(4-fluorophenyl)-[1,2,4]triazolo[4,3-b]pyridazin-6-yl]oxy}ethyl)-2-methoxybenzamide	[H]N(C(=O)c1c([H])c(Cl)c([H])c([H])c1OC([H])([H])[H])C([H])([H])C([H])([H])Oc1nn2c(nnc2c([H])c1[H])-c1c([H])c([H])c(F)c([H])c1[H]	AID: 685510	Active	0.196593	0.510227	0.629225	0.396062	0.686086	0.684029	0.85015	-0.179785	0.815335	-0.129583	0.737598	0.769739	1.19886	0.667718	0.176737	0.496336	1.29622	-0.496259	-0.639861	0.988589	-0.445072	-0.596963	0.837185	-0.329143	-0.376823	-0.67041	0.454464	0.293294	0.00716466	-0.133484	-0.25068	0.339514	0.0630665	-0.0288028	-0.138312	-1.36534	0.486608	0.607301	0.390284	3
1-(4-chlorophenyl)-5-methyl-N-{[4-(4-methylpiperidin-1-yl)phenyl]methyl}-1H-pyrazole-4-carboxamide	[H]N(C(=O)c1c([H])nn(c1C([H])([H])[H])-c1c([H])c([H])c(Cl)c([H])c1[H])C([H])([H])c1c([H])c([H])c(c([H])c1[H])N1C([H])([H])C([H])([H])C([H])(C([H])([H])[H])C([H])([H])C1([H])[H]	PMID: 23762275	Active	1.12669	0.755637	0.64701	-0.455612	0.556421	0.55409	-0.143403	-0.179785	0.348617	-0.129583	-0.418741	0.769739	-0.0573867	0.571138	0.571986	0.496336	0.572358	0.175588	-0.0367353	0.015093	0.564727	0.307496	0.837185	-0.329143	-0.376823	-0.00320641	0.622192	0.59142	0.472956	0.388815	0.132435	0.639646	0.532691	0.490492	0.265632	-0.528755	0.478508	0.59569	0.374036	3
2-ethoxy-N-[3-methyl-1-(6-methyl-4-oxo-1,4-dihydropyrimidin-2-yl)-1H-pyrazol-5-yl]naphthalene-1-carboxamide	[H]N(C(=O)c1c(OC([H])([H])C([H])([H])[H])c([H])c([H])c2c([H])c([H])c([H])c([H])c12)c1c([H])c(nn1C1=NC(=C([H])C(=O)N1[H])C([H])([H])[H])C([H])([H])[H]	AID: 685509	Active	0.182309	0.575037	0.480238	0.632966	0.422446	0.423395	0.85015	0.333968	0.348617	0.432983	0.352152	0.769739	0.570737	0.571138	0.308486	0.496336	1.29622	-0.496259	-0.639861	0.988589	-0.445072	-0.596963	0.837185	-0.329143	-0.376823	-0.533937	0.41582	0.270645	0.00220158	-0.158232	-0.130762	0.414673	0.183842	0.0288386	0.0556616	-1.56324	0.345671	0.309273	0.0791957	3
5-bromo-N-[3-methyl-1-(4-oxo-6-propyl-1,4-dihydropyrimidin-2-yl)-1H-pyrazol-5-yl]furan-2-carboxamide	[H]N(C(=O)c1oc(Br)c([H])c1[H])c1c([H])c(nn1C1=NC(=C([H])C(=O)N1[H])C([H])([H])C([H])([H])C([H])([H])[H])C([H])([H])[H]	AID: 685509	Active	-0.138916	0.0739377	0.132008	0.71523	0.441652	0.436306	0.85015	0.333968	0.348617	0.432983	0.352152	0.769739	0.884798	0.0882375	-0.13068	-0.183772	0.572358	-0.496259	-0.639861	1.96209	-0.445072	-0.596963	-1.32275	-0.329143	-0.376823	-0.295108	0.155842	-0.0064624	-0.171465	-0.424715	-0.431792	-0.0698271	-0.216502	-0.388746	-0.377524	-0.429805	0.077239	0.109054	0.151136	4
ethyl 3-(3-methyl-1,2-oxazole-5-amido)-1-benzofuran-2-carboxylate	[H]N(C(=O)c1onc(c1[H])C([H])([H])[H])c1c(oc2c([H])c([H])c([H])c([H])c12)C(=O)OC([H])([H])C([H])([H])[H]	AID: 685510	Active	0.0552775	-0.27924	-0.201019	0.478747	-0.189464	-0.188578	0.518965	-0.179785	0.348617	-0.129583	0.352152	0.769739	0.256675	-0.104922	-0.306347	-0.183772	0.572358	-0.496259	-0.639861	0.988589	-0.445072	-0.596963	-0.242784	-0.329143	-0.376823	-0.514034	-0.268106	-0.38263	-0.578243	-0.647678	-0.642571	-0.242997	-0.401379	-0.463344	-0.457584	-0.79862	-0.202708	-0.177841	-0.221529	4
N-[(1E)-1-(benzenesulfonyl)-5-phenylpent-1-en-3-yl]-2-{[(E)-4-methylpiperazine-1-carbonyl]amino}-3-phenylpropanamide	[H]N(C(=O)N1C([H])([H])C([H])([H])N(C([H])([H])[H])C([H])([H])C1([H])[H])C([H])(C(=O)N([H])C([H])(C([H])=C([H])S(=O)(=O)c1c([H])c([H])c([H])c([H])c1[H])C([H])([H])C([H])([H])c1c([H])c([H])c([H])c([H])c1[H])C([H])([H])c1c([H])c([H])c([H])c([H])c1[H]	PMID: 17214506	Active	0.34705	1.77229	1.64097	0.568165	1.59832	1.5989	0.85015	0.333968	2.21549	0.432983	-0.0332944	3.03014	0.884798	1.63352	1.53815	0.496336	0.572358	0.175588	-0.0367353	-0.958403	0.564727	0.307496	1.91715	-0.329143	-0.376823	-0.0761818	1.57093	1.78517	1.51762	1.2589	0.893909	1.53862	1.1833	0.946763	0.616244	-1.57223	1.62832	2.08093	2.03955	3
flubendazole	[H]N(C(=O)OC([H])([H])[H])c1nc2c([H])c([H])c(c([H])c2n1[H])C(=O)c1c([H])c([H])c(F)c([H])c1[H]	PMID: 11190780	Active	0.0279893	-0.264036	-0.21577	0.258044	-0.19639	-0.195476	0.187781	0.333968	0.115258	0.432983	-0.418741	0.769739	0.256675	-0.104922	-0.39418	-0.183772	0.572358	-0.496259	-0.639861	0.015093	-0.445072	-0.596963	0.837185	-0.329143	-0.376823	-0.951887	-0.346011	-0.463775	-0.589547	-0.609369	-0.655377	-0.324688	-0.412776	-0.424821	-0.470427	-0.915562	-0.217745	-0.198383	-0.143231	4
physostigmine	[H]N(C(=O)Oc1c([H])c([H])c2N(C([H])([H])[H])C3([H])N(C([H])([H])[H])C([H])([H])C([H])([H])C3(c2c1[H])C([H])([H])[H])C([H])([H])[H]	PMID: 4123928	Active	-0.749831	-0.357763	-0.39368	-0.568172	-0.456791	-0.456021	-0.143403	-0.179785	-0.35146	-0.129583	-0.418741	0.769739	-0.371448	-0.394662	-0.13068	-0.183772	-0.875371	0.175588	0.566391	-0.958403	0.564727	1.21196	-0.242784	-0.329143	-0.376823	0.697357	-0.291556	-0.405315	-0.251911	-0.0998084	0.0498359	-0.265835	-0.0723621	0.0875888	0.236766	0.406776	-0.394135	-0.58942	-0.608703	5
methomyl	[H]N(C(=O)ON=C(SC([H])([H])[H])C([H])([H])[H])C([H])([H])[H]	PMID: 19597541	Active	-1.17736	-1.28909	-1.30082	-0.444461	-1.23339	-1.23318	-0.474587	-0.179785	-0.118101	-0.129583	-0.418741	0.769739	-0.371448	-1.36046	-1.05293	-2.2241	-1.59923	-0.496259	-0.639861	-0.958403	-0.445072	-0.596963	-1.32275	-0.329143	-0.376823	0.930879	-1.15576	-1.1884	-1.2549	-1.2497	-1.43502	-1.37162	-1.37154	-1.3023	-1.30014	1.34231	-0.87072	-0.400206	0.263366	5
2-{[(2-fluorophenyl)amino](phenyl)phosphoroso}-1,3-benzothiazole	[H]N(c1c([H])c([H])c([H])c([H])c1F)P(=O)(c1nc2c([H])c([H])c([H])c([H])c2s1)c1c([H])c([H])c([H])c([H])c1[H]	AID: 1011	Active	0.996397	0.277105	0.085818	-0.627503	0.181725	0.182179	-0.805772	-0.179785	-0.118101	-0.129583	-0.804187	-0.360463	-0.0573867	0.0882375	-0.218513	0.496336	1.29622	-0.496259	-0.639861	0.015093	-0.445072	-0.596963	1.91715	-0.329143	-0.376823	-1.17081	0.084657	0.442513	0.681336	1.0213	1.14973	-0.0662852	-0.202191	-0.225716	-0.277125	-0.25889	-0.0612589	-0.0541729	-0.164087	4
mirasan	[H]N(c1c([H])c([H])c(c(Cl)c1[H])C([H])([H])[H])C([H])([H])C([H])([H])N(C([H])([H])C([H])([H])[H])C([H])([H])C([H])([H])[H]	PMID: 6035771	Active	0.197128	-0.508446	-0.648259	-1.18968	-0.694114	-0.696649	-1.13696	-0.179785	0.348617	-0.129583	-1.18963	-0.360463	-0.999572	-0.780982	-0.306347	-1.54399	-0.875371	-0.496259	-0.639861	-0.958403	-0.445072	-0.596963	-0.242784	-0.329143	-0.376823	0.715321	-0.496727	-0.578284	-0.71678	-0.618348	-0.802376	-0.537928	-0.65841	-0.576791	-0.695172	1.32432	-0.383002	0.0335256	0.204672	5
lucanthone	[H]N(c1c([H])c([H])c(c2Sc3c([H])c([H])c([H])c([H])c3C(=O)c12)C([H])([H])[H])C([H])([H])C([H])([H])N(C([H])([H])C([H])([H])[H])C([H])([H])C([H])([H])[H]	PMID: 6022391	Active	0.822164	0.371305	0.0581835	-0.830533	-0.0096561	-0.0094628	-0.805772	-0.179785	0.348617	-0.129583	-0.418741	-0.360463	-0.68551	-0.00834246	0.176737	-0.183772	0.572358	-0.496259	-0.639861	0.015093	-0.445072	-0.596963	0.837185	-0.329143	-0.376823	0.0551739	0.17469	0.222871	0.0671555	0.302794	0.247061	0.154959	-0.0539098	0.0339444	-0.0670258	0.262848	0.050434	0.178984	-0.0956976	4
amoscanate	[H]N(c1c([H])c([H])c(N=C=S)c([H])c1[H])c1c([H])c([H])c(c([H])c1[H])N(=O)=O	PMID: 7409075	Active	0.587131	-0.378594	-0.471759	-0.0901576	-0.484597	-0.484339	-0.143403	-0.179785	-0.118101	-0.129583	-0.0332944	-0.360463	-0.0573867	-0.491242	-0.701596	-0.863881	-0.151506	-0.496259	-0.639861	-0.958403	-0.445072	-0.596963	0.837185	-0.329143	-0.376823	-1.17081	-0.589893	-0.70195	-0.849212	-0.873347	-0.875413	-0.670275	-0.727195	-0.72232	-0.736231	-0.321859	-0.437244	-0.203266	0.00263802	4
1-N-{3,3-dimethyl-1,2,5-trioxaspiro[5.5]undecan-9-yl}-4-N-[7-(trifluoromethyl)quinolin-4-yl]cyclohexane-1,4-diamine	[H]N(c1c([H])c([H])nc2c([H])c(c([H])c([H])c12)C(F)(F)F)C1([H])C([H])([H])C([H])([H])C([H])(N([H])C2([H])C([H])([H])C([H])([H])C3(OOC(C([H])([H])[H])(C([H])([H])[H])C([H])([H])O3)C([H])([H])C2([H])[H])C([H])([H])C1([H])[H]	AID: 562280	Active	1.68605	0.889631	0.996002	-0.150961	1.0411	1.04235	0.187781	0.333968	0.115258	0.432983	0.352152	-0.360463	0.884798	1.05404	1.09899	1.17644	-0.151506	1.51928	1.16952	0.015093	0.564727	0.307496	-0.242784	1.88064	1.50313	1.11949	0.954762	1.05168	1.14776	0.864206	0.744102	1.20096	1.33883	1.05699	0.932981	0.235862	0.992044	0.746482	0.79978	2
7-chloro-N-(2-{6,7,14-trioxa-11-azadispiro[4.2.5?.2?]pentadecan-11-yl}ethyl)quinolin-4-amine	[H]N(c1c([H])c([H])nc2c([H])c(Cl)c([H])c([H])c12)C([H])([H])C([H])([H])N1C([H])([H])C([H])([H])C2(OOC3(C([H])([H])C([H])([H])C([H])([H])C3([H])[H])C([H])([H])O2)C([H])([H])C1([H])[H]	AID: 562278	Active	0.767832	0.534971	0.5438	-0.335898	0.521942	0.5197	0.187781	-0.179785	-0.118101	-0.129583	0.352152	-0.360463	0.256675	0.474558	0.571986	1.17644	-0.151506	1.51928	1.16952	0.015093	1.57452	1.21196	-0.242784	0.77575	0.563152	0.899035	0.49924	0.651046	0.614156	0.622281	0.511666	0.699673	0.675053	0.731188	0.628641	0.685637	0.362495	0.356341	0.227375	3
7-chloro-N-(2-{7,8,16-trioxa-3-azadispiro[5.2.5?.2?]hexadecan-3-yl}ethyl)quinolin-4-amine	[H]N(c1c([H])c([H])nc2c([H])c(Cl)c([H])c([H])c12)C([H])([H])C([H])([H])N1C([H])([H])C([H])([H])C2(OOC3(C([H])([H])O2)C([H])([H])C([H])([H])C([H])([H])C([H])([H])C3([H])[H])C([H])([H])C1([H])[H]	AID: 562280	Active	0.99471	0.653915	0.64868	-0.335898	0.618227	0.615993	0.187781	-0.179785	-0.118101	-0.129583	0.352152	-0.360463	0.256675	0.571138	0.703736	1.17644	-0.151506	1.51928	1.16952	0.015093	1.57452	1.21196	-0.242784	0.77575	0.563152	0.961338	0.611446	0.779769	0.715218	0.709552	0.587175	0.829262	0.776946	0.818947	0.704362	0.685637	0.47616	0.510496	0.297625	3
1-N-(7-chloroquinolin-4-yl)-4-N-{3,3-dimethyl-1,2,5-trioxaspiro[5.5]undecan-9-yl}cyclohexane-1,4-diamine	[H]N(c1c([H])c([H])nc2c([H])c(Cl)c([H])c([H])c12)C1([H])C([H])([H])C([H])([H])C([H])(N([H])C2([H])C([H])([H])C([H])([H])C3(OOC(C([H])([H])[H])(C([H])([H])[H])C([H])([H])O3)C([H])([H])C2([H])[H])C([H])([H])C1([H])[H]	AID: 562278	Active	1.47353	0.889837	0.85498	-0.150961	0.810795	0.808579	0.187781	0.333968	-0.118101	0.432983	0.352152	-0.360463	0.256675	0.764298	0.967236	1.17644	-0.151506	1.51928	1.16952	0.015093	0.564727	0.307496	-0.242784	1.88064	1.50313	1.07099	0.87542	0.987316	1.11009	0.818761	0.728369	1.03821	1.17507	0.928768	0.845952	0.685637	0.704627	0.634337	0.559474	2
1-N-(7-chloroquinolin-4-yl)-4-N-{6,7,14-trioxadispiro[4.2.5?.2?]pentadecan-11-yl}cyclohexane-1,4-diamine	[H]N(c1c([H])c([H])nc2c([H])c(Cl)c([H])c([H])c12)C1([H])C([H])([H])C([H])([H])C([H])(N([H])C2([H])C([H])([H])C([H])([H])C3(OOC4(C([H])([H])C([H])([H])C([H])([H])C4([H])[H])C([H])([H])O3)C([H])([H])C2([H])[H])C([H])([H])C1([H])[H]	AID: 562278	Active	1.78422	1.07326	1.04817	-0.150961	0.989525	0.987316	0.187781	0.333968	-0.118101	0.432983	0.352152	-0.360463	0.256675	0.957458	1.1429	1.85655	-0.151506	2.19113	1.77264	0.015093	0.564727	0.307496	-0.242784	2.98554	2.4431	1.1644	1.00688	1.29808	1.29029	1.30099	1.23253	1.35106	1.35676	1.41369	1.35153	0.685637	0.780731	0.759163	0.474622	2
4-N-(7-chloroquinolin-4-yl)-1-N-{3,3-dimethyl-1,2,5-trioxaspiro[5.5]undecan-9-yl}-1-N-methylcyclohexane-1,4-diamine	[H]N(c1c([H])c([H])nc2c([H])c(Cl)c([H])c([H])c12)C1([H])C([H])([H])C([H])([H])C([H])(N(C([H])([H])[H])C2([H])C([H])([H])C([H])([H])C3(OOC(C([H])([H])[H])(C([H])([H])[H])C([H])([H])O3)C([H])([H])C2([H])[H])C([H])([H])C1([H])[H]	AID: 562280	Active	1.67255	1.00905	0.96332	-0.335898	0.907079	0.904872	0.187781	-0.179785	-0.118101	-0.129583	0.352152	-0.360463	0.256675	0.860878	1.09899	1.17644	-0.151506	1.51928	1.16952	0.015093	0.564727	0.307496	-0.242784	1.88064	1.50313	1.11949	1.02573	1.08676	1.22803	1.03504	0.904856	1.13832	1.29398	1.14626	1.02293	0.685637	0.819369	0.696641	0.595915	2
6-chloro-5-beta-diethylaminoethylamino-8-methylquinoline	[H]N(c1c(Cl)c([H])c(c2nc([H])c([H])c([H])c12)C([H])([H])[H])C([H])([H])C([H])([H])N(C([H])([H])C([H])([H])[H])C([H])([H])C([H])([H])[H]	PMID: 4964494	Active	0.515956	-0.11426	-0.287374	-0.918478	-0.34371	-0.346185	-0.805772	-0.179785	0.348617	-0.129583	-0.804187	-0.360463	-0.68551	-0.394662	-0.0867633	-0.863881	-0.151506	-0.496259	-0.639861	0.015093	-0.445072	-0.596963	-0.242784	-0.329143	-0.376823	0.361671	-0.175461	-0.249662	-0.434968	-0.365493	-0.379599	-0.207095	-0.374279	-0.284222	-0.336202	0.793583	-0.173147	0.0709145	-0.0763472	4
6-chloro-N-[3-({4-[(6-chloro-2-methoxyacridin-9-yl)amino]butyl}amino)propyl]-2-methoxyacridin-9-amine	[H]N(c1c2c([H])c([H])c(Cl)c([H])c2nc2c([H])c([H])c(OC([H])([H])[H])c([H])c12)C([H])([H])C([H])([H])C([H])([H])N([H])C([H])([H])C([H])([H])C([H])([H])C([H])([H])N([H])c1c2c([H])c([H])c(Cl)c([H])c2nc2c([H])c([H])c(OC([H])([H])[H])c([H])c12	AID: 322086	Active	3.27676	2.39895	2.03471	0.179146	1.968	1.96272	0.518965	0.847721	1.98213	0.99555	0.737598	-0.360463	0.884798	1.92326	1.53815	1.85655	2.74395	-0.496259	-0.639861	0.988589	-0.445072	-0.596963	2.99712	-0.329143	-0.376823	-0.270088	1.91767	1.82833	1.36273	1.14101	0.957031	1.78691	1.30401	1.17029	1.004	-1.65319	1.62679	1.84852	1.08372	3
6-chloro-N-[3-({3-[(6-chloro-2-methoxyacridin-9-yl)amino]propyl}amino)propyl]-2-methoxyacridin-9-amine	[H]N(c1c2c([H])c([H])c(Cl)c([H])c2nc2c([H])c([H])c(OC([H])([H])[H])c([H])c12)C([H])([H])C([H])([H])C([H])([H])N([H])C([H])([H])C([H])([H])C([H])([H])N([H])c1c2c([H])c([H])c(Cl)c([H])c2nc2c([H])c([H])c(OC([H])([H])[H])c([H])c12	AID: 322086	Active	3.04988	2.28	1.92983	0.179146	1.87172	1.86643	0.518965	0.847721	1.74877	0.99555	0.737598	-0.360463	0.884798	1.82668	1.4064	1.85655	2.74395	-0.496259	-0.639861	0.988589	-0.445072	-0.596963	2.99712	-0.329143	-0.376823	-0.34662	1.80546	1.6996	1.26167	1.05374	0.888	1.65732	1.20211	1.08253	0.934779	-1.65319	1.5116	1.68112	1.01131	3
bis({3-[(6-chloro-2-methoxyacridin-9-yl)amino]propyl})(methyl)amine	[H]N(c1c2c([H])c([H])c(Cl)c([H])c2nc2c([H])c([H])c(OC([H])([H])[H])c([H])c12)C([H])([H])C([H])([H])C([H])([H])N(C([H])([H])[H])C([H])([H])C([H])([H])C([H])([H])N([H])c1c2c([H])c([H])c(Cl)c([H])c2nc2c([H])c([H])c(OC([H])([H])[H])c([H])c12	AID: 322086	Active	3.2489	2.39921	2.03817	-0.00578967	1.968	1.96272	0.518965	0.333968	1.74877	0.432983	0.737598	-0.360463	0.884798	1.92326	1.53815	1.85655	2.74395	-0.496259	-0.639861	0.988589	-0.445072	-0.596963	2.99712	-0.329143	-0.376823	-0.270088	1.95577	1.79552	1.41982	1.1838	0.998191	1.75388	1.36157	1.21332	1.04528	-1.65319	1.62679	1.73912	1.03327	3
6-chloro-9-[11-(6-chloro-2-methoxyacridin-9-yl)-1,4,8,11-tetraazaundecan-1-yl]-2-methoxyacridine	[H]N(c1c2c([H])c([H])c(Cl)c([H])c2nc2c([H])c([H])c(OC([H])([H])[H])c([H])c12)C([H])([H])C([H])([H])N([H])C([H])([H])C([H])([H])C([H])([H])N([H])C([H])([H])C([H])([H])N([H])c1c2c([H])c([H])c(Cl)c([H])c2nc2c([H])c([H])c(OC([H])([H])[H])c([H])c12	AID: 322086	Active	2.58432	2.49261	2.12616	0.43225	2.07107	2.06585	0.85015	1.36147	2.21549	1.55812	1.12304	-0.360463	1.19886	2.01984	1.62599	1.85655	2.74395	-0.496259	-0.639861	0.988589	-0.445072	-0.596963	2.99712	-0.329143	-0.376823	-0.270088	1.99701	1.88164	1.37499	1.14101	0.957031	1.84059	1.31637	1.17029	1.004	-1.68917	1.73759	2.01144	1.27418	3
7-chloro-N-(3-{[4-({7-chloro-2-methoxybenzo[b]1,5-naphthyridin-10-yl}amino)butyl]amino}propyl)-2-methoxybenzo[b]1,5-naphthyridin-10-amine	[H]N(c1c2nc(OC([H])([H])[H])c([H])c([H])c2nc2c([H])c(Cl)c([H])c([H])c12)C([H])([H])C([H])([H])C([H])([H])N([H])C([H])([H])C([H])([H])C([H])([H])C([H])([H])N([H])c1c2nc(OC([H])([H])[H])c([H])c([H])c2nc2c([H])c(Cl)c([H])c([H])c12	AID: 322086	Active	2.57303	2.28534	2.00899	0.721542	1.98157	1.97639	1.18133	0.847721	1.98213	0.99555	1.50849	-0.360463	1.51292	1.92326	1.45032	1.85655	2.74395	-0.496259	-0.639861	2.93558	-0.445072	-0.596963	0.837185	-0.329143	-0.376823	-0.215499	1.87636	1.76132	1.27027	1.01623	0.83135	1.71946	1.21078	1.04482	0.877971	-1.77913	1.61065	1.82494	1.06523	3
2-{phenyl[(1,3-thiazol-2-yl)amino]phosphoroso}-1,3-benzothiazole	[H]N(c1nc([H])c([H])s1)P(=O)(c1nc2c([H])c([H])c([H])c([H])c2s1)c1c([H])c([H])c([H])c([H])c1[H]	AID: 1011	Active	0.599403	0.166689	-0.0345608	-0.356306	0.106404	0.106337	-0.474587	-0.179785	-0.118101	-0.129583	-0.0332944	-0.360463	0.256675	-0.104922	-0.39418	0.496336	1.29622	-0.496259	-0.639861	0.988589	-0.445072	-0.596963	0.837185	-0.329143	-0.376823	-1.17081	0.0274186	0.472965	0.753362	1.14151	1.34928	-0.263616	-0.387383	-0.389419	-0.409123	0.172893	-0.233693	-0.195825	-0.259436	4
2-{[(5-chloropyridin-2-yl)amino](phenyl)phosphoroso}-1,3-benzothiazole	[H]N(c1nc([H])c(Cl)c([H])c1[H])P(=O)(c1nc2c([H])c([H])c([H])c([H])c2s1)c1c([H])c([H])c([H])c([H])c1[H]	AID: 1011	Active	0.943647	0.35045	0.174096	-0.356306	0.301457	0.29874	-0.474587	-0.179785	-0.118101	-0.129583	-0.418741	-0.360463	0.256675	0.0882375	-0.26243	0.496336	1.29622	-0.496259	-0.639861	0.988589	-0.445072	-0.596963	0.837185	-0.329143	-0.376823	-1.17081	0.18396	0.502184	0.772305	1.04204	1.11891	-0.104174	-0.236253	-0.279204	-0.32777	0.00197903	-0.0282229	-0.00985303	-0.0889622	4
N-(4-{[4-(diethylamino)-6-methylpyrimidin-2-yl]amino}phenyl)-2,4-dimethylbenzene-1-sulfonamide	[H]N(c1nc(c([H])c(n1)C([H])([H])[H])N(C([H])([H])C([H])([H])[H])C([H])([H])C([H])([H])[H])c1c([H])c([H])c(N([H])S(=O)(=O)c2c([H])c([H])c(c([H])c2C([H])([H])[H])C([H])([H])[H])c([H])c1[H]	AID: 685510	Active	1.00574	0.890759	0.679205	0.324108	0.670539	0.671002	0.518965	0.333968	0.815335	0.432983	0.352152	-0.360463	0.570737	0.667718	0.703736	-0.183772	0.572358	-0.496259	-0.639861	0.015093	-0.445072	-0.596963	0.837185	-0.329143	-0.376823	-0.104737	0.816276	0.838902	0.645618	0.516953	0.429454	0.602348	0.356791	0.166672	0.0664597	-0.834602	0.728234	0.705854	0.724224	3
5-chloro-2-methoxy-4-methyl-N-(4-{[4-methyl-6-(morpholin-4-yl)pyrimidin-2-yl]amino}phenyl)benzene-1-sulfonamide	[H]N(c1nc(c([H])c(n1)C([H])([H])[H])N1C([H])([H])C([H])([H])OC([H])([H])C1([H])[H])c1c([H])c([H])c(N([H])S(=O)(=O)c2c([H])c(Cl)c(c([H])c2OC([H])([H])[H])C([H])([H])[H])c([H])c1[H]	AID: 685511	Active	0.624202	1.05296	1.00093	0.712495	1.11278	1.11026	1.18133	0.333968	0.581976	0.432983	1.12304	-0.360463	1.51292	0.957458	0.703736	0.496336	0.572358	0.175588	-0.0367353	0.015093	0.564727	0.307496	0.837185	-0.329143	-0.376823	-0.104737	1.02054	1.03434	0.879333	0.736974	0.569891	0.701136	0.475076	0.293784	0.130841	-0.789625	0.909633	0.887952	0.723367	3
4-methyl-N'-[(7-nitro-2-{[(propan-2-yl)amino]methyl}-1,2,3,4-tetrahydroquinolin-6-yl)methylidene]benzene-1-sulfonohydrazide	[H]N(N=C([H])c1c([H])c2c(N([H])C([H])(C([H])([H])N([H])C([H])(C([H])([H])[H])C([H])([H])[H])C([H])([H])C2([H])[H])c([H])c1N(=O)=O)S(=O)(=O)c1c([H])c([H])c(c([H])c1[H])C([H])([H])[H]	AID: 202228	Active	-0.0714512	0.743454	0.638606	1.13433	0.711449	0.712047	1.18133	0.847721	0.815335	0.99555	0.737598	-0.360463	1.19886	0.667718	0.615903	-0.183772	-0.151506	-0.496259	-0.0367353	-0.958403	-0.445072	0.307496	0.837185	-0.329143	-0.376823	0.163595	0.681988	0.78471	0.789668	0.449562	0.20263	0.547792	0.499137	0.205262	0.0510555	-0.69967	0.745918	0.731103	0.820402	3
4-methoxy-N'-[(7-nitro-2-{[(propan-2-yl)amino]methyl}-1,2,3,4-tetrahydroquinolin-6-yl)methylidene]benzene-1-sulfonohydrazide	[H]N(N=C([H])c1c([H])c2c(N([H])C([H])(C([H])([H])N([H])C([H])(C([H])([H])[H])C([H])([H])[H])C([H])([H])C2([H])[H])c([H])c1N(=O)=O)S(=O)(=O)c1c([H])c([H])c(OC([H])([H])[H])c([H])c1[H]	AID: 202228	Active	-0.245824	0.790212	0.722866	1.32853	0.82127	0.821938	1.51252	0.847721	1.04869	0.99555	1.12304	-0.360463	1.51292	0.764298	0.65982	-0.183772	-0.151506	-0.496259	-0.0367353	-0.958403	-0.445072	0.307496	0.837185	-0.329143	-0.376823	0.163595	0.74677	0.81364	0.750358	0.462985	0.21863	0.576916	0.459503	0.21876	0.0671	-0.87958	0.840299	0.867053	0.800242	3
(2-{9-[2-(4,5-dihydro-1,3-thiazol-2-yl)hydrazin-1-ylidene]-9,10-dihydroacridin-10-yl}ethyl)diethylamine	[H]N(N=C1c2c([H])c([H])c([H])c([H])c2N(c2c([H])c([H])c([H])c([H])c12)C([H])([H])C([H])([H])N(C([H])([H])C([H])([H])[H])C([H])([H])C([H])([H])[H])C1=NC([H])([H])C([H])([H])S1	PMID: 2515579	Active	0.338036	0.733906	0.440883	-0.565858	0.354614	0.354927	-0.143403	-0.179785	0.581976	-0.129583	0.352152	-0.360463	-0.0573867	0.377978	0.484153	0.496336	0.572358	-0.496259	-0.0367353	0.015093	-0.445072	0.307496	0.837185	-0.329143	-0.376823	0.10294	0.492424	0.638166	0.306304	0.405486	0.320843	0.529221	0.178151	0.286615	0.222107	-0.0969714	0.303027	0.562931	0.123459	3
10-(2-(4-Methyl-1-piperazinyl)ethyl)-9(10H)-acridinone (4,5-dihydro-2-thiazolyl)hydrazone	[H]N(N=C1c2c([H])c([H])c([H])c([H])c2N(c2c([H])c([H])c([H])c([H])c12)C([H])([H])C([H])([H])N1C([H])([H])C([H])([H])N(C([H])([H])[H])C([H])([H])C1([H])[H])C1=NC([H])([H])C([H])([H])S1	PMID: 24265055	Active	-0.298458	0.892318	0.624099	-0.49769	0.540126	0.540502	0.187781	-0.179785	0.115258	-0.129583	0.737598	-0.360463	0.256675	0.571138	0.615903	1.17644	0.572358	0.175588	0.566391	0.015093	0.564727	1.21196	0.837185	-0.329143	-0.376823	0.199856	0.629119	0.809486	0.625888	0.650357	0.547929	0.701693	0.500364	0.532855	0.449831	-0.132953	0.372708	0.562614	0.184658	3
homidium	[H]N=C1C([H])=C([H])C2=C3C([H])=C([H])C(N([H])[H])=C([H])C3=C(N(C2=C1[H])C([H])([H])C([H])([H])[H])c1c([H])c([H])c([H])c([H])c1[H]	PMID: 19597541	Active	0.832545	0.19925	-0.0420075	-0.357989	-0.195594	-0.194984	-0.805772	0.847721	-0.584819	0.432983	-0.804187	-0.360463	-0.999572	-0.00834246	-0.0428467	0.496336	-0.151506	-0.496259	0.566391	-0.958403	-0.445072	0.307496	0.837185	-0.329143	0.563152	-0.837211	-0.109389	-0.0956885	-0.239129	-0.171452	-0.0781619	0.0458749	-0.0594748	0.0155443	0.108409	-0.780629	-0.240473	-0.288699	-0.441712	4
N-(3-chloro-4-methylphenyl)-piperazine	[H]N1C([H])([H])C([H])([H])N(c2c([H])c([H])c(c(Cl)c2[H])C([H])([H])[H])C([H])([H])C1([H])[H]	PMID: 6035771	Active	-0.584589	-0.796853	-0.874593	-1.18968	-0.90052	-0.903083	-1.13696	-0.179785	-0.818178	-0.129583	-1.18963	-0.360463	-0.999572	-0.974142	-0.65768	-0.863881	-0.875371	0.175588	-0.0367353	-0.958403	0.564727	0.307496	-0.242784	-0.329143	-0.376823	0.421378	-0.814096	-0.810831	-0.787409	-0.683227	-0.76191	-0.772039	-0.72962	-0.642033	-0.652125	1.32432	-0.807912	-0.637094	-0.49542	5
1H,7H-pyrazolo[1,5-a]pyrimidine-7-thione	[H]N1C([H])=C([H])C2=NC([H])=C([H])C(=S)N12	PMID: 7241518	Active	-0.972005	-1.33515	-1.32851	-0.814754	-1.30904	-1.30893	-0.805772	-0.179785	-1.05154	-0.129583	-0.804187	-0.360463	-0.68551	-1.36046	-1.27251	-0.863881	-0.151506	-0.496259	-0.639861	0.988589	-0.445072	-0.596963	-1.32275	-0.329143	-0.376823	-1.17081	-1.32395	-1.34386	-1.27916	-1.17776	-1.10916	-1.31651	-1.22861	-1.10825	-1.01419	0.937511	-1.31417	-1.23251	-0.969327	4
5-methyl-1H,7H-pyrazolo[1,5-a]pyrimidine-7-thione	[H]N1C([H])=C([H])C2=NC(=C([H])C(=S)N12)C([H])([H])[H]	PMID: 7241518	Active	-0.79263	-1.21312	-1.22363	-0.814754	-1.21275	-1.21264	-0.805772	-0.179785	-1.05154	-0.129583	-0.804187	-0.360463	-0.68551	-1.26388	-1.14076	-0.863881	-0.151506	-0.496259	-0.639861	0.988589	-0.445072	-0.596963	-1.32275	-0.329143	-0.376823	-0.67041	-1.17754	-1.23554	-1.14976	-1.11453	-0.980817	-1.20746	-1.09815	-1.03827	-0.932474	0.937511	-1.20178	-1.16711	-0.866571	4
5-phenyl-1H,7H-pyrazolo[1,5-a]pyrimidine-7-thione	[H]N1C([H])=C([H])C2=NC(=C([H])C(=S)N12)c1c([H])c([H])c([H])c([H])c1[H]	PMID: 7241518	Active	-0.00249192	-0.679867	-0.750846	-0.814754	-0.786684	-0.786566	-0.805772	-0.179785	-0.818178	-0.129583	-0.804187	-0.360463	-0.68551	-0.780982	-0.833346	-0.183772	0.572358	-0.496259	-0.639861	0.988589	-0.445072	-0.596963	-0.242784	-0.329143	-0.376823	-1.17081	-0.7988	-0.808006	-0.832507	-0.785878	-0.733563	-0.777044	-0.778281	-0.707777	-0.659285	0.235862	-0.869779	-0.800129	-0.698372	4
ethyl 5-methyl-7-sulfanylidene-1H,7H-pyrazolo[1,5-a]pyrimidine-3-carboxylate	[H]N1C([H])=C(C(=O)OC([H])([H])C([H])([H])[H])C2=NC(=C([H])C(=S)N12)C([H])([H])[H]	PMID: 7241518	Active	-0.689863	-0.802044	-0.756156	-0.261418	-0.718097	-0.717824	-0.143403	-0.179785	-0.35146	-0.129583	-0.0332944	-0.360463	-0.0573867	-0.780982	-0.745513	-0.863881	-0.151506	-0.496259	-0.639861	0.988589	-0.445072	-0.596963	-1.32275	-0.329143	-0.376823	-0.119967	-0.710016	-0.831172	-0.889484	-0.900808	-0.809524	-0.800367	-0.835727	-0.823349	-0.757675	0.460749	-0.686812	-0.67484	-0.601297	4
3-phenyl-1H,7H-pyrazolo[1,5-a]pyrimidine-7-thione	[H]N1C([H])=C(C2=NC([H])=C([H])C(=S)N12)c1c([H])c([H])c([H])c([H])c1[H]	PMID: 7241518	Active	-0.00249192	-0.679867	-0.750846	-0.814754	-0.786684	-0.786566	-0.805772	-0.179785	-0.818178	-0.129583	-0.804187	-0.360463	-0.68551	-0.780982	-0.833346	-0.183772	0.572358	-0.496259	-0.639861	0.988589	-0.445072	-0.596963	-0.242784	-0.329143	-0.376823	-1.17081	-0.7988	-0.809057	-0.834353	-0.758733	-0.731765	-0.778102	-0.780142	-0.68688	-0.632711	0.235862	-0.869779	-0.800129	-0.728153	4
3,5-diphenyl-1H,7H-pyrazolo[1,5-a]pyrimidin-7-one	[H]N1C([H])=C(C2=NC(=C([H])C(=O)N12)c1c([H])c([H])c([H])c([H])c1[H])c1c([H])c([H])c([H])c([H])c1[H]	PMID: 7241518	Active	0.170654	-0.14216	-0.2753	-0.455612	-0.374626	-0.373971	-0.474587	-0.179785	-0.584819	-0.129583	-0.804187	-0.360463	-0.68551	-0.201502	-0.39418	0.496336	1.29622	-0.496259	-0.639861	0.988589	-0.445072	-0.596963	0.837185	-0.329143	-0.376823	-1.17081	-0.403216	-0.378301	-0.507263	-0.471259	-0.466331	-0.238638	-0.329815	-0.285939	-0.280849	-0.843598	-0.472952	-0.427143	-0.495953	4
3-(3-methylphenyl)-5-phenyl-1H,7H-pyrazolo[1,5-a]pyrimidin-7-one	[H]N1C([H])=C(C2=NC(=C([H])C(=O)N12)c1c([H])c([H])c([H])c([H])c1[H])c1c([H])c([H])c([H])c(c1[H])C([H])([H])[H]	PMID: 7241518	Active	0.350028	-0.0201249	-0.17042	-0.455612	-0.278342	-0.277678	-0.474587	-0.179785	-0.584819	-0.129583	-0.804187	-0.360463	-0.68551	-0.104922	-0.26243	0.496336	1.29622	-0.496259	-0.639861	0.988589	-0.445072	-0.596963	0.837185	-0.329143	-0.376823	-0.986454	-0.256806	-0.272571	-0.363354	-0.385983	-0.383087	-0.132198	-0.184721	-0.200186	-0.197372	-0.843598	-0.361007	-0.363039	-0.383108	4
5-methyl-3-phenyl-1H,7H-pyrazolo[1,5-a]pyrimidine-7-thione	[H]N1C([H])=C(C2=NC(=C([H])C(=S)N12)C([H])([H])[H])c1c([H])c([H])c([H])c([H])c1[H]	PMID: 7241518	Active	0.176882	-0.557832	-0.645966	-0.814754	-0.6904	-0.690273	-0.805772	-0.179785	-0.818178	-0.129583	-0.804187	-0.360463	-0.68551	-0.684402	-0.701596	-0.183772	0.572358	-0.496259	-0.639861	0.988589	-0.445072	-0.596963	-0.242784	-0.329143	-0.376823	-0.901365	-0.65239	-0.700736	-0.704955	-0.695041	-0.608304	-0.669053	-0.64968	-0.616432	-0.55589	0.235862	-0.757503	-0.73579	-0.618841	4
6-methyl-2-phenoxy-1,2,3,4-tetrahydro-1,3,2??-diazaphosphinine-2,4-dione	[H]N1C(=O)C([H])=C(N([H])P1(=O)Oc1c([H])c([H])c([H])c([H])c1[H])C([H])([H])[H]	AID: 1011	Active	-0.736571	-0.837036	-0.821931	-0.0922615	-0.711926	-0.710998	-0.143403	0.333968	-0.584819	0.432983	-0.804187	0.769739	-0.0573867	-0.780982	-0.745513	-0.863881	-0.875371	-0.496259	-0.0367353	-0.958403	-0.445072	0.307496	-0.242784	-0.329143	-0.376823	-0.820531	-0.752383	-0.562338	-0.494115	-0.511928	-0.37112	-0.845009	-0.815935	-0.898944	-0.806192	0.415772	-0.692647	-0.682653	-0.349809	5
2-(4-chlorophenoxy)-6-methyl-1,2,3,4-tetrahydro-1,3,2??-diazaphosphinine-2,4-dione	[H]N1C(=O)C([H])=C(N([H])P1(=O)Oc1c([H])c([H])c(Cl)c([H])c1[H])C([H])([H])[H]	AID: 1011	Active	-0.356559	-0.707968	-0.652156	-0.0922615	-0.475489	-0.477673	-0.143403	0.333968	-0.584819	0.432983	-0.804187	0.769739	0.256675	-0.684402	-0.745513	-0.863881	-0.875371	-0.496259	-0.0367353	-0.958403	-0.445072	0.307496	-0.242784	-0.329143	-0.376823	-0.820531	-0.584726	-0.439374	-0.329096	-0.399381	-0.311282	-0.819178	-0.775337	-0.874219	-0.800152	0.676641	-0.541742	-0.575649	-0.146712	5
2-(4-ethoxyphenoxy)-6-methyl-1,2,3,4-tetrahydro-1,3,2??-diazaphosphinine-2,4-dione	[H]N1C(=O)C([H])=C(N([H])P1(=O)Oc1c([H])c([H])c(OC([H])([H])C([H])([H])[H])c([H])c1[H])C([H])([H])[H]	AID: 1011	Active	-0.50469	-0.549299	-0.527911	0.101932	-0.409537	-0.408522	0.187781	0.333968	-0.118101	0.432983	-0.418741	0.769739	0.256675	-0.491242	-0.438096	-0.863881	-0.875371	-0.496259	-0.0367353	-0.958403	-0.445072	0.307496	-0.242784	-0.329143	-0.376823	-0.295108	-0.428984	-0.276421	-0.325076	-0.375252	-0.250649	-0.557167	-0.645506	-0.761503	-0.685383	0.235862	-0.364289	-0.332709	0.0253905	5
6-methyl-2-(naphthalen-2-yloxy)-1,2,3,4-tetrahydro-1,3,2??-diazaphosphinine-2,4-dione	[H]N1C(=O)C([H])=C(N([H])P1(=O)Oc1c([H])c([H])c2c([H])c([H])c([H])c([H])c2c1[H])C([H])([H])[H]	AID: 1011	Active	-0.0658796	-0.386045	-0.448187	-0.0922615	-0.368304	-0.367372	-0.143403	0.333968	-0.584819	0.432983	-0.804187	0.769739	-0.0573867	-0.394662	-0.482013	-0.183772	-0.151506	-0.496259	-0.0367353	-0.958403	-0.445072	0.307496	0.837185	-0.329143	-0.376823	-0.920612	-0.410466	-0.200703	-0.152272	-0.170621	-0.057306	-0.48094	-0.471279	-0.555728	-0.488005	-0.0519939	-0.452667	-0.508688	-0.315898	4
N-[(2S)-1,4-dioxan-2-ylmethyl]-4-methoxy-N-[(7-methoxy-2-oxo-1,2-dihydroquinolin-3-yl)methyl]benzene-1-sulfonamide	[H]N1C(=O)C(=C([H])c2c([H])c([H])c(OC([H])([H])[H])c([H])c12)C([H])([H])N(C([H])([H])C1([H])OC([H])([H])C([H])([H])OC1([H])[H])S(=O)(=O)c1c([H])c([H])c(OC([H])([H])[H])c([H])c1[H]	AID: 1011	Active	-0.530164	0.77458	0.799164	0.743633	0.910443	0.911066	1.18133	-0.179785	0.815335	-0.129583	0.737598	-0.360463	1.19886	0.860878	0.65982	0.496336	0.572358	0.175588	-0.0367353	0.015093	0.564727	0.307496	0.837185	-0.329143	-0.376823	0.0475591	0.791757	0.865611	0.778413	0.79944	0.624914	0.640408	0.407935	0.350915	0.192483	-0.645697	0.811715	0.855877	0.610416	3
N-[(5,8-dimethyl-2-oxo-1,2-dihydroquinolin-3-yl)methyl]-4-methoxy-N-[3-(2-oxopyrrolidin-1-yl)propyl]benzene-1-sulfonamide	[H]N1C(=O)C(=C([H])c2c1c(c([H])c([H])c2C([H])([H])[H])C([H])([H])[H])C([H])([H])N(C([H])([H])C([H])([H])C([H])([H])N1C(=O)C([H])([H])C([H])([H])C1([H])[H])S(=O)(=O)c1c([H])c([H])c(OC([H])([H])[H])c([H])c1[H]	AID: 1011	Active	0.170851	1.10418	1.02451	0.588362	1.06888	1.06944	0.85015	-0.179785	1.04869	-0.129583	-0.0332944	0.769739	0.884798	1.05404	0.967236	0.496336	0.572358	0.175588	-0.0367353	0.015093	0.564727	0.307496	0.837185	-0.329143	-0.376823	0.176425	1.09171	1.20178	1.16318	1.19696	0.974589	0.978842	0.795866	0.738893	0.540167	-0.870584	1.01589	0.932418	0.631915	3
nilutamide	[H]N1C(=O)N(C(=O)C1(C([H])([H])[H])C([H])([H])[H])c1c([H])c([H])c(c(c1[H])C(F)(F)F)N(=O)=O	PMID: 20576641	Active	-0.357548	-0.618491	-0.354978	0.436248	-0.169379	-0.168159	0.518965	-0.179785	-0.35146	-0.129583	-0.418741	3.03014	1.19886	-0.201502	-0.52593	-0.863881	-0.875371	0.175588	-0.0367353	-0.958403	0.564727	0.307496	-0.242784	-0.329143	-0.376823	-0.00320641	-0.456774	-0.655164	-0.480326	-0.663696	-0.695263	-0.517365	-0.302656	-0.479452	-0.510424	-0.402818	-0.0939051	-0.510662	-0.338687	5
pimozide	[H]N1C(=O)N(c2c([H])c([H])c([H])c([H])c12)C1([H])C([H])([H])C([H])([H])N(C([H])([H])C([H])([H])C([H])([H])C([H])(c2c([H])c([H])c(F)c([H])c2[H])c2c([H])c([H])c(F)c([H])c2[H])C([H])([H])C1([H])[H]	PMID: 4155765	Active	1.62486	1.00328	0.897326	-0.647701	0.821352	0.822313	-0.474587	-0.179785	0.581976	-0.129583	-0.804187	-0.360463	-0.0573867	0.957458	0.835486	1.17644	1.29622	0.175588	-0.0367353	0.015093	0.564727	0.307496	1.91715	-0.329143	-0.376823	-0.0449066	0.76476	0.898672	0.673342	0.71777	0.688913	1.04693	0.860505	0.909739	0.877637	-0.942548	0.726404	0.860153	0.48155	3
niridazole	[H]N1C(=O)N(c2nc([H])c(s2)N(=O)=O)C([H])([H])C1([H])[H]	PMID: 2609988	Active	-1.44367	-1.09978	-0.995848	0.348303	-0.876509	-0.876126	0.518965	-0.179785	-0.584819	-0.129583	-0.0332944	1.89994	0.570737	-0.974142	-1.05293	-0.863881	-0.875371	0.175588	-0.0367353	0.015093	0.564727	0.307496	-1.32275	-0.329143	-0.376823	-0.00320641	-1.02973	-0.994403	-0.921309	-0.796277	-0.76169	-1.07051	-1.03188	-0.953976	-0.901208	0.451754	-0.920283	-0.892411	-0.713524	5
ethyl 3,9-diazatricyclo[8.4.0.0?,?]tetradeca-1(10),4,6,11,13-pentaene-8-carboxylate	[H]N1c2c([H])c([H])c([H])c([H])c2C([H])([H])n2c([H])c([H])c([H])c2C1([H])C(=O)OC([H])([H])C([H])([H])[H]	PMID: 23707253	Active	-0.289094	-0.49541	-0.51722	-0.600783	-0.587533	-0.586848	-0.474587	-0.179785	-0.35146	-0.129583	-0.418741	-0.360463	-0.68551	-0.491242	-0.39418	-0.183772	-0.151506	-0.496259	-0.0367353	0.015093	-0.445072	0.307496	-0.242784	-0.329143	-0.376823	-0.236728	-0.551451	-0.531196	-0.653129	-0.579954	-0.516606	-0.392563	-0.476881	-0.395242	-0.331266	-0.0250075	-0.563571	-0.479575	-0.468239	4
ethyl 2-thia-3,9-diazatricyclo[8.4.0.0?,?]tetradeca-1(10),4,6,11,13-pentaene-8-carboxylate	[H]N1c2c([H])c([H])c([H])c([H])c2Sn2c([H])c([H])c([H])c2C1([H])C(=O)OC([H])([H])C([H])([H])[H]	PMID: 23707253	Active	0.00583065	-0.439944	-0.453063	-0.600783	-0.463703	-0.46348	-0.474587	-0.179785	-0.35146	-0.129583	-0.0332944	-0.360463	-0.371448	-0.491242	-0.482013	-0.183772	-0.151506	-0.496259	-0.0367353	0.015093	-0.445072	0.307496	-0.242784	-0.329143	-0.376823	-0.420209	-0.46931	-0.404966	-0.469049	-0.340514	-0.251372	-0.465932	-0.584035	-0.534256	-0.484829	0.289835	-0.523621	-0.424784	-0.427965	4
ethyl 4-chloro-2-thia-3,9-diazatricyclo[8.4.0.0?,?]tetradeca-1(10),4,6,11,13-pentaene-8-carboxylate	[H]N1c2c([H])c([H])c([H])c([H])c2Sn2c(Cl)c([H])c([H])c2C1([H])C(=O)OC([H])([H])C([H])([H])[H]	PMID: 23707253	Active	0.385842	-0.310876	-0.283288	-0.600783	-0.227265	-0.230155	-0.474587	-0.179785	-0.35146	-0.129583	-0.0332944	-0.360463	-0.0573867	-0.394662	-0.482013	-0.183772	-0.151506	-0.496259	-0.0367353	0.015093	-0.445072	0.307496	-0.242784	-0.329143	-0.376823	-0.420209	-0.301653	-0.27941	-0.333143	-0.156806	-0.125389	-0.437492	-0.550474	-0.509627	-0.472351	0.550704	-0.375743	-0.317875	-0.406796	4
5-(2-chlorophenyl)-3-methyl-7-nitro-2,3,4,5-tetrahydro-1H-1,4-benzodiazepin-2-one	[H]N1c2c([H])c([H])c(c([H])c2C([H])(N([H])C([H])(C1=O)C([H])([H])[H])c1c([H])c([H])c([H])c([H])c1Cl)N(=O)=O	PMID: 22321778	Active	0.119008	-0.118096	-0.095249	0.262042	-0.0696012	-0.0719047	0.187781	0.333968	-0.584819	0.432983	-0.418741	0.769739	0.256675	-0.104922	-0.306347	-0.183772	-0.151506	-0.496259	-0.0367353	-0.958403	-0.445072	0.307496	0.837185	-0.329143	-0.376823	-0.514034	-0.201508	-0.275911	-0.304258	-0.285111	-0.331403	-0.233521	-0.242493	-0.219578	-0.250419	-0.213913	-0.127418	-0.171199	-0.186278	4
5-(2-chlorophenyl)-3-methyl-7-nitro-2,3,4,5-tetrahydro-1H-1,4-benzodiazepine-2-thione	[H]N1c2c([H])c([H])c(c([H])c2C([H])(N([H])C([H])(C1=S)C([H])([H])[H])c1c([H])c([H])c([H])c([H])c1Cl)N(=O)=O	PMID: 22321778	Active	0.584747	0.0774645	0.00686813	-0.0971006	0.0406929	0.0378644	-0.143403	0.333968	-0.584819	0.432983	-0.418741	-0.360463	0.256675	-0.104922	-0.306347	-0.183772	-0.151506	-0.496259	-0.0367353	-0.958403	-0.445072	0.307496	0.837185	-0.329143	-0.376823	-0.514034	-0.0719429	-0.170809	-0.178536	-0.126063	-0.255373	-0.233521	-0.242493	-0.219578	-0.250419	0.163898	-0.0786796	-0.105667	-0.134219	4
clonazepam	[H]N1c2c([H])c([H])c(c([H])c2C(=NC([H])([H])C1=O)c1c([H])c([H])c([H])c([H])c1Cl)N(=O)=O	PMID: 17316476	Active	-0.0148158	-0.219462	-0.210914	0.268985	-0.179724	-0.182046	0.187781	-0.179785	-0.584819	-0.129583	-0.418741	0.769739	0.256675	-0.201502	-0.52593	-0.183772	-0.151506	-0.496259	-0.0367353	-0.958403	-0.445072	0.307496	0.837185	-0.329143	-0.376823	-0.937292	-0.360253	-0.437418	-0.498901	-0.495503	-0.501804	-0.396114	-0.438738	-0.426016	-0.4129	-0.474782	-0.276665	-0.278113	-0.307157	4
meclonazepam	[H]N1c2c([H])c([H])c(c([H])c2C(=NC([H])(C1=O)C([H])([H])[H])c1c([H])c([H])c([H])c([H])c1Cl)N(=O)=O	PMID: 22321778	Active	0.211132	-0.101085	-0.106034	0.268985	-0.0834395	-0.0857529	0.187781	-0.179785	-0.584819	-0.129583	-0.418741	0.769739	0.256675	-0.104922	-0.39418	-0.183772	-0.151506	-0.496259	-0.0367353	-0.958403	-0.445072	0.307496	0.837185	-0.329143	-0.376823	-0.73296	-0.222159	-0.320423	-0.376011	-0.388965	-0.451573	-0.278332	-0.314836	-0.318882	-0.362528	-0.474782	-0.16103	-0.215933	-0.221543	4
5-(2-chlorophenyl)-3-methyl-7-nitro-2,3-dihydro-1H-1,4-benzodiazepine-2-thione	[H]N1c2c([H])c([H])c(c([H])c2C(=NC([H])(C1=S)C([H])([H])[H])c1c([H])c([H])c([H])c([H])c1Cl)N(=O)=O	PMID: 22321778	Active	0.676871	0.0944753	-0.00391724	-0.0901576	0.0268546	0.0240161	-0.143403	-0.179785	-0.584819	-0.129583	-0.418741	-0.360463	0.256675	-0.104922	-0.39418	-0.183772	-0.151506	-0.496259	-0.0367353	-0.958403	-0.445072	0.307496	0.837185	-0.329143	-0.376823	-0.73296	-0.0925935	-0.21532	-0.250289	-0.234261	-0.382094	-0.278332	-0.314836	-0.318882	-0.362528	-0.0969714	-0.112339	-0.151009	-0.170288	4
2-phenyl-1H,7H-pyrazolo[1,5-a]pyrimidine-7-thione	[H]N1N2C(=NC([H])=C([H])C2=S)C([H])=C1c1c([H])c([H])c([H])c([H])c1[H]	PMID: 7241518	Active	-0.00249192	-0.679867	-0.750846	-0.814754	-0.786684	-0.786566	-0.805772	-0.179785	-0.818178	-0.129583	-0.804187	-0.360463	-0.68551	-0.780982	-0.833346	-0.183772	0.572358	-0.496259	-0.639861	0.988589	-0.445072	-0.596963	-0.242784	-0.329143	-0.376823	-1.17081	-0.7988	-0.809057	-0.829409	-0.774761	-0.758527	-0.778102	-0.775158	-0.702998	-0.659547	0.235862	-0.869779	-0.800129	-0.698372	4
5-methyl-2-phenyl-1H,7H-pyrazolo[1,5-a]pyrimidine-7-thione	[H]N1N2C(=NC(=C([H])C2=S)C([H])([H])[H])C([H])=C1c1c([H])c([H])c([H])c([H])c1[H]	PMID: 7241518	Active	0.176882	-0.557832	-0.645966	-0.814754	-0.6904	-0.690273	-0.805772	-0.179785	-0.818178	-0.129583	-0.804187	-0.360463	-0.68551	-0.684402	-0.701596	-0.183772	0.572358	-0.496259	-0.639861	0.988589	-0.445072	-0.596963	-0.242784	-0.329143	-0.376823	-0.901365	-0.65239	-0.700736	-0.700011	-0.711537	-0.629854	-0.669053	-0.644695	-0.63302	-0.577501	0.235862	-0.757503	-0.73579	-0.58432	4
5-methyl-2-(3,4,5-trimethoxyphenyl)-1H,7H-pyrazolo[1,5-a]pyrimidine-7-thione	[H]N1N2C(=NC(=C([H])C2=S)C([H])([H])[H])C([H])=C1c1c([H])c(OC([H])([H])[H])c(OC([H])([H])[H])c(OC([H])([H])[H])c1[H]	PMID: 7241518	Active	0.191888	-0.0514517	-0.0785459	-0.232173	-0.0720861	-0.0717213	0.187781	-0.179785	-0.118101	-0.129583	0.352152	-0.360463	0.256675	-0.104922	-0.174597	-0.183772	0.572358	-0.496259	-0.639861	0.988589	-0.445072	-0.596963	-0.242784	-0.329143	-0.376823	-0.295108	-0.0188127	-0.293678	-0.400449	-0.400526	-0.365506	-0.259256	-0.342668	-0.32027	-0.312411	-0.303868	-0.139012	-0.186673	-0.280983	4
2,5-diphenyl-1H,7H-pyrazolo[1,5-a]pyrimidine-7-thione	[H]N1N2C(=NC(=C([H])C2=S)c2c([H])c([H])c([H])c([H])c2[H])C([H])=C1c1c([H])c([H])c([H])c([H])c1[H]	PMID: 7241518	Active	0.967021	-0.0245818	-0.173183	-0.814754	-0.264332	-0.264202	-0.805772	-0.179785	-0.584819	-0.129583	-0.804187	-0.360463	-0.68551	-0.201502	-0.39418	0.496336	1.29622	-0.496259	-0.639861	0.988589	-0.445072	-0.596963	0.837185	-0.329143	-0.376823	-1.17081	-0.27365	-0.273198	-0.382757	-0.382881	-0.3826	-0.238638	-0.324831	-0.302526	-0.304312	-0.465787	-0.426023	-0.365351	-0.420281	4
perphenazine	[H]OC([H])([H])C([H])([H])N1C([H])([H])C([H])([H])N(C([H])([H])C([H])([H])C([H])([H])N2c3c([H])c([H])c([H])c([H])c3Sc3c([H])c([H])c(Cl)c([H])c23)C([H])([H])C1([H])[H]	PMID: 20060828	Active	0.511524	0.551384	0.45019	-0.880817	0.426132	0.423286	-0.474587	-0.179785	0.348617	-0.129583	-0.0332944	-0.360463	-0.0573867	0.281398	0.39632	0.496336	-0.151506	0.175588	0.566391	-0.958403	0.564727	1.21196	0.837185	-0.329143	-0.376823	0.330395	0.441306	0.596364	0.509293	0.589373	0.621976	0.433004	0.256986	0.301333	0.278321	0.865547	0.311091	0.574915	0.347324	3
ergonovine	[H]OC([H])([H])C([H])(N([H])C(=O)C1([H])C([H])=C2c3c([H])c([H])c([H])c4n([H])c([H])c(c34)C([H])([H])C2([H])N(C([H])([H])[H])C1([H])[H])C([H])([H])[H]	PMID: 19597541	Active	-0.889006	0.0611932	-0.033608	-0.0726949	-0.113168	-0.112394	-0.143403	0.847721	-0.118101	0.99555	-0.804187	0.769739	-0.371448	-0.00834246	0.13282	0.496336	-0.151506	-0.496259	0.566391	0.015093	-0.445072	0.307496	-0.242784	-0.329143	0.563152	0.304058	-0.0363504	-0.00273292	0.0542658	0.0926976	0.149529	0.139456	0.236335	0.281171	0.336739	0.0829385	-0.131745	-0.23016	-0.377834	5
perseitol	[H]OC([H])([H])C([H])(O[H])C([H])(O[H])C([H])(O[H])C([H])(O[H])C([H])(O[H])C([H])([H])O[H]	PMID: 19597541	Active	-4.23845	-1.23651	-1.02907	1.46844	-0.890293	-0.889361	0.518965	2.90273	0.348617	3.24582	0.737598	-0.360463	0.256675	-0.974142	-0.613763	-2.2241	-1.59923	-0.496259	-0.639861	-0.958403	-0.445072	-0.596963	-1.32275	-0.329143	-0.376823	2.33201	-1.08547	-1.14419	-1.10359	-1.09597	-1.19036	-1.00968	-0.931044	-0.914146	-1.00691	1.72911	-0.336645	-0.101435	0.00794956	5
9-(S)-[3-hydroxy-2-(phosphonomethoxy)propyl]adenine	[H]OC([H])([H])C([H])(OC([H])([H])P(=O)(O[H])O[H])C([H])([H])n1c([H])nc2c(nc([H])nc12)N([H])[H]	PMID: 14638494	Active	-2.40894	-0.607924	-0.494175	1.78403	-0.265533	-0.264269	1.51252	1.87523	0.348617	1.55812	1.12304	-0.360463	1.51292	-0.394662	-0.438096	-0.863881	-0.151506	-0.496259	-0.639861	0.988589	-0.445072	-0.596963	-1.32275	-0.329143	-0.376823	0.385996	-0.484386	-0.291436	-0.329223	-0.699782	-0.699493	-0.617091	-0.607842	-0.686139	-0.688148	0.5597	-0.203869	-0.214909	0.019182	5
(2R,3R,4R,5S)-2-(hydroxymethyl)-1-[(pentafluorophenyl)methyl]piperidine-3,4,5-triol	[H]OC([H])([H])C1([H])N(C([H])([H])c2c(F)c(F)c(F)c(F)c2F)C([H])([H])C([H])(O[H])C([H])(O[H])C1([H])O[H]	PMID: 22101135	Active	-1.99013	-0.68699	-0.26687	0.259727	0.00926166	0.0106218	-0.143403	1.36147	-0.35146	1.55812	-0.0332944	-0.360463	1.19886	-0.104922	-0.306347	-0.863881	-0.875371	0.175588	-0.0367353	-0.958403	0.564727	0.307496	-0.242784	-0.329143	-0.376823	0.715321	-0.430869	-0.494611	-0.444788	-0.392382	-0.473109	-0.355732	-0.266826	-0.206621	-0.287647	0.784587	0.181167	0.00385113	-0.138938	5
ribostamycin	[H]OC([H])([H])C1([H])OC([H])(OC2([H])C([H])(O[H])C([H])(N([H])[H])C([H])([H])C([H])(N([H])[H])C2([H])OC2([H])OC([H])(C([H])([H])N([H])[H])C([H])(O[H])C([H])(O[H])C2([H])N([H])[H])C([H])(O[H])C1([H])O[H]	PMID: 19597541	Active	-5.65044	0.246866	0.580012	4.00937	0.772761	0.774218	2.83726	6.499	0.348617	4.93352	3.43572	-0.360463	2.45511	0.667718	0.923319	-0.183772	-1.59923	1.51928	1.16952	-0.958403	1.57452	1.21196	-1.32275	0.77575	0.563152	2.33201	0.405919	0.433307	0.419287	0.392772	0.214888	0.578429	0.604359	0.582924	0.402282	1.47724	1.03172	0.915728	0.499146	2
hycanthone	[H]OC([H])([H])c1c([H])c([H])c(N([H])C([H])([H])C([H])([H])N(C([H])([H])C([H])([H])[H])C([H])([H])C([H])([H])[H])c2C(=O)c3c([H])c([H])c([H])c([H])c3Sc12	PMID: 6022391	Active	0.347516	0.401853	0.137182	-0.404907	0.100164	0.100428	-0.474587	0.333968	0.581976	0.432983	-0.0332944	-0.360463	-0.371448	0.0882375	0.220653	-0.183772	0.572358	-0.496259	-0.639861	0.015093	-0.445072	-0.596963	0.837185	-0.329143	-0.376823	0.0551739	0.199178	0.26658	0.0672525	0.301131	0.282598	0.198962	-0.0538119	0.0532596	-0.0462334	0.226866	0.162424	0.342981	0.0341302	3
oxamniquine	[H]OC([H])([H])c1c([H])c2c(N([H])C([H])(C([H])([H])N([H])C([H])(C([H])([H])[H])C([H])([H])[H])C([H])([H])C2([H])[H])c([H])c1N(=O)=O	PMID: 3838223	Active	-0.727789	-0.36874	-0.412741	0.328526	-0.429416	-0.428574	0.187781	0.847721	0.115258	0.99555	-0.0332944	-0.360463	-0.0573867	-0.394662	-0.13068	-0.863881	-0.875371	-0.496259	-0.0367353	-0.958403	-0.445072	0.307496	-0.242784	-0.329143	-0.376823	0.830798	-0.384511	-0.411597	-0.381955	-0.50135	-0.506263	-0.272159	-0.203476	-0.316198	-0.320894	0.487736	-0.213319	-0.116064	-0.0626673	5
6-{dispiro[adamantane-2,2'-[1,3,5]trioxolane-4',1''-cyclohexane]-4''-yl}hexan-3-ol	[H]OC([H])(C([H])([H])C([H])([H])[H])C([H])([H])C([H])([H])C([H])([H])C1([H])C([H])([H])C([H])([H])C2(OOC3(O2)C2([H])C([H])([H])C4([H])C([H])([H])C([H])(C2([H])[H])C([H])([H])C3([H])C4([H])[H])C([H])([H])C1([H])[H]	PMID: 17283188	Active	1.0944	0.145966	0.23889	-0.50274	0.155318	0.156116	-0.474587	-0.179785	0.115258	-0.129583	-0.418741	-0.360463	-0.68551	0.184818	0.791569	1.85655	-1.59923	3.53482	2.97889	-0.958403	0.564727	0.307496	-1.32275	5.19532	4.32305	2.33201	0.326346	0.73089	0.945906	1.19785	1.44688	0.878015	1.13531	1.3925	1.63773	1.83706	0.168011	0.0208559	-0.168029	2
metrifonate	[H]OC([H])(C(Cl)(Cl)Cl)P(=O)(OC([H])([H])[H])OC([H])([H])[H]	PMID: 3088784	Active	-0.524755	-1.14079	-0.95097	-0.337791	-0.579763	-0.588212	-0.474587	-0.179785	-0.118101	-0.129583	-0.418741	-0.360463	0.570737	-1.1673	-1.05293	-2.2241	-1.59923	-0.496259	-0.639861	-0.958403	-0.445072	-0.596963	-1.32275	-0.329143	-0.376823	2.33201	-0.75839	-0.781527	-0.09836	-0.286198	-0.522733	-1.35621	-1.26286	-1.18133	-1.18669	2.86255	-0.425859	-0.566443	-0.140974	5
3-[hydroxy(phenyl)methyl]-4-[(1-methyl-1H-imidazol-4-yl)methyl]oxolan-2-one	[H]OC([H])(c1c([H])c([H])c([H])c([H])c1[H])C1([H])C(=O)OC([H])([H])C1([H])C([H])([H])c1nc([H])n(c1[H])C([H])([H])[H]	PMID: 22420337	Active	-0.91762	-0.410908	-0.332769	-0.157063	-0.381428	-0.380664	-0.143403	-0.179785	-0.118101	-0.129583	-0.0332944	-0.360463	-0.371448	-0.298082	-0.218513	-0.183772	-0.151506	0.175588	-0.0367353	0.015093	0.564727	0.307496	-0.242784	-0.329143	-0.376823	0.142744	-0.384971	-0.387121	-0.379141	-0.373984	-0.344865	-0.247518	-0.200638	-0.188119	-0.159043	0.055952	-0.323945	-0.246471	-0.213487	5
quinine	[H]OC([H])(c1c([H])c([H])nc2c([H])c([H])c(OC([H])([H])[H])c([H])c12)C1([H])N2C([H])([H])C([H])([H])C([H])(C1([H])[H])C([H])(C([H])=C([H])[H])C2([H])[H]	PMID: 4218352	Active	0.0639898	0.0727501	-0.0103306	-0.551762	-0.11995	-0.119232	-0.474587	-0.179785	-0.118101	-0.129583	-0.418741	-0.360463	-0.68551	-0.00834246	0.176737	1.17644	-0.151506	1.51928	1.16952	0.015093	2.58432	2.11641	-0.242784	-0.329143	-0.376823	0.405456	-0.0337912	0.0425645	0.0405846	0.285381	0.334996	0.185058	0.222541	0.474932	0.522727	0.262848	-0.109029	-0.117676	-0.326728	5
[truncated: 610 more rows]
